# Supplementary material for: Expression profile and bioinformatics analysis of circular RNAs in acute ischemic stroke in a South Chinese Han population
Source: PubMed Central journal article supplement (PMC7311391; doi:10.1038/s41598-020-66990-y), 2020-06-23
Supplement: 41598_2020_66990_MOESM1_ESM.pdf [file 41598_2020_66990_MOESM1_ESM.pdf]

## Supplementary information

### Expression profile and bioinformatics analysis of circular RNAs in acute ischemic stroke in a South Chinese Han population

Shenghua Li, Lan Chen, Chen Xu, Xiang Qu, Zhenxiu Qin, Jinggui Gao, Jinpin Li, Jingli Liu

stroke\_vs\_control.DE circRNAs

| ID                 | stroke_readcount | control_readcount | log2(FC) | pval       | padj      |
|--------------------|------------------|-------------------|----------|------------|-----------|
| hsa_circ_0001439   | 14.7896824       | 629.2338212       | -5.3498  | 6.3472E-26 | 2.964E-22 |
| hsa_circ_0001481   | 8.065262512      | 601.4670998       | -6.1868  | 7.9807E-22 | 1.456E-18 |
| hsa_circ_0001522   | 16.74131407      | 666.2746833       | -5.2781  | 9.3568E-22 | 1.456E-18 |
| hsa_circ_0087391   | 7.976769331      | 215.1937078       | -4.7032  | 1.1499E-18 | 1.342E-15 |
| novel_circ_0020133 | 209.7459284      | 12.46375399       | 4.0399   | 8.4267E-16 | 7.869E-13 |
| hsa_circ_0001085   | 5.853662677      | 177.8263166       | -4.8569  | 1.389E-15  | 1.081E-12 |
| hsa_circ_0000839   | 16.71093888      | 219.4278249       | -3.6843  | 1.6754E-14 | 1.118E-11 |
| hsa_circ_0001451   | 18.88382572      | 205.8928587       | -3.423   | 2.5875E-14 | 1.393E-11 |
| hsa_circ_0091382   | 13.93547749      | 197.6087774       | -3.8156  | 2.6854E-14 | 1.393E-11 |
| hsa_circ_0001707   | 24.33664074      | 228.120169        | -3.2113  | 3.6064E-14 | 1.684E-11 |
| hsa_circ_0001346   | 20.95572583      | 222.442467        | -3.3893  | 8.1311E-14 | 3.451E-11 |
| hsa_circ_0074623   | 131.0282593      | 6.766348687       | 4.2665   | 1.0305E-13 | 4.009E-11 |
| hsa_circ_0000471   | 48.52263785      | 362.9973433       | -2.8914  | 1.2876E-13 | 4.624E-11 |
| hsa_circ_0004089   | 5.636686549      | 137.1418743       | -4.5521  | 1.4271E-13 | 4.76E-11  |
| novel_circ_0010890 | 146.8435772      | 7.563005115       | 4.2562   | 2.2301E-13 | 6.942E-11 |
| hsa_circ_0001868   | 0.874939251      | 151.2306097       | -7.01    | 3.5687E-13 | 1.041E-10 |
| hsa_circ_0000231   | 2.446554613      | 206.2053504       | -6.3474  | 1.814E-12  | 4.982E-10 |
| novel_circ_0002839 | 2.346994228      | 104.2811922       | -5.4702  | 1.9628E-12 | 5.091E-10 |
| hsa_circ_0003632   | 6.085888048      | 99.97379625       | -4.0077  | 4.1821E-12 | 1.028E-09 |
| hsa_circ_0000396   | 14.08612112      | 164.0239523       | -3.523   | 1.0681E-11 | 2.494E-09 |
| hsa_circ_0004036   | 114.1530298      | 9.371758295       | 3.5944   | 1.3338E-11 | 2.965E-09 |
| novel_circ_0007625 | 4.511543278      | 102.1670589       | -4.4852  | 2.4631E-11 | 5.227E-09 |
| hsa_circ_0001550   | 29.20210419      | 292.7339351       | -3.2961  | 2.6575E-11 | 5.333E-09 |
| hsa_circ_0067735   | 16.21195719      | 343.4462705       | -4.3465  | 2.7413E-11 | 5.333E-09 |
| hsa_circ_0001315   | 1.148607018      | 106.0757439       | -6.4258  | 3.3044E-11 | 6.171E-09 |
| hsa_circ_0000826   | 1.223277306      | 89.97055856       | -6.1972  | 3.8399E-11 | 6.64E-09  |
| novel_circ_0001345 | 152.7984469      | 3.716014939       | 5.2933   | 3.7447E-11 | 6.64E-09  |
| hsa_circ_0001524   | 6.145309094      | 91.23958603       | -3.8319  | 4.3202E-11 | 7.204E-09 |
| novel_circ_0001660 | 75.94308828      | 1.00724855        | 6.216    | 5.6637E-11 | 9.119E-09 |
| hsa_circ_0005720   | 1589.427047      | 105.4324708       | 3.8768   | 7.658E-11  | 1.117E-08 |
| hsa_circ_0043837   | 700.7504989      | 107.2124834       | 2.6959   | 7.5425E-11 | 1.117E-08 |
| novel_circ_0016587 | 140.938805       | 7.666361895       | 4.1723   | 7.455E-11  | 1.117E-08 |
| hsa_circ_0001663   | 7.867568092      | 88.46153924       | -3.4728  | 8.4568E-11 | 1.197E-08 |
| hsa_circ_0007723   | 0.765738012      | 92.21665031       | -6.7746  | 8.7934E-11 | 1.208E-08 |
| hsa_circ_0091669   | 1.731899852      | 76.21711768       | -5.3283  | 9.1008E-11 | 1.214E-08 |
| hsa_circ_0000398   | 5.56201626       | 81.95133673       | -3.8278  | 1.1439E-10 | 1.484E-08 |
| hsa_circ_0001492   | 49.71411362      | 342.3460313       | -2.769   | 1.2205E-10 | 1.54E-08  |
| hsa_circ_0006660   | 157.9537342      | 8.927803796       | 4.1044   | 1.6451E-10 | 2.021E-08 |
| hsa_circ_0040356   | 144.2312267      | 9.137426278       | 3.954    | 1.6939E-10 | 2.028E-08 |
| hsa_circ_0007765   | 7.968431535      | 108.6220109       | -3.7219  | 1.7524E-10 | 2.046E-08 |
| hsa_circ_0009043   | 1.631036409      | 88.86561307       | -5.7655  | 2.0394E-10 | 2.267E-08 |
| novel_circ_0010889 | 94.15770782      | 1.683595786       | 5.778    | 2.0282E-10 | 2.267E-08 |
| hsa_circ_0001263   | 7.267722958      | 103.4956704       | -3.8097  | 2.4454E-10 | 2.655E-08 |
| hsa_circ_0001083   | 1.349030846      | 71.30989734       | -5.5456  | 2.8865E-10 | 3.063E-08 |
| hsa_circ_0007292   | 14.34466294      | 160.9818903       | -3.4625  | 4.055E-10  | 4.207E-08 |
| hsa_circ_0058494   | 129.205436       | 15.11664339       | 3.0573   | 4.5342E-10 | 4.504E-08 |
| novel_circ_0006144 | 1.148607018      | 71.93278894       | -5.895   | 4.4393E-10 | 4.504E-08 |
| hsa_circ_0008179   | 1021.066571      | 138.8228446       | 2.8618   | 5.7956E-10 | 5.637E-08 |
| hsa_circ_0002538   | 36.12697418      | 225.1123088       | -2.6237  | 6.0632E-10 | 5.777E-08 |
| hsa_circ_0003764   | 3.75544612       | 95.04410263       | -4.5647  | 7.5006E-10 | 7.004E-08 |
| novel_circ_0009889 | 83.64729077      | 1.00724855        | 6.3068   | 7.7831E-10 | 7.125E-08 |
| hsa_circ_0072437   | 5.161168604      | 81.22704118       | -3.9534  | 1.4321E-09 | 1.286E-07 |
| hsa_circ_0001661   | 6.318113418      | 72.82326375       | -3.5291  | 2.121E-09  | 1.869E-07 |

|                    |             |             |         |            |           |
|--------------------|-------------|-------------|---------|------------|-----------|
| hsa_circ_0000118   | 1.398811038 | 56.97794514 | -5.2191 | 2.4703E-09 | 2.097E-07 |
| novel_circ_0016791 | 50.40660769 | 2.16436403  | 4.4027  | 2.4536E-09 | 2.097E-07 |
| hsa_circ_0000160   | 25.6387441  | 259.0333465 | -3.2998 | 2.8933E-09 | 2.412E-07 |
| novel_circ_0009875 | 55.8345589  | 2.268690451 | 4.5157  | 3.4523E-09 | 2.828E-07 |
| hsa_circ_0001769   | 12.68600703 | 118.9918225 | -3.2271 | 4.442E-09  | 3.576E-07 |
| hsa_circ_0001460   | 16.36963556 | 171.1100542 | -3.3501 | 6.8809E-09 | 5.445E-07 |
| novel_circ_0014827 | 49.85772252 | 0.694269288 | 5.7291  | 7.0772E-09 | 5.507E-07 |
| novel_circ_0002974 | 5.087924666 | 59.56399453 | -3.4804 | 8.1005E-09 | 6.2E-07   |
| hsa_circ_0000567   | 38.25972169 | 261.0772298 | -2.7488 | 8.6539E-09 | 6.313E-07 |
| hsa_circ_0004379   | 133.8355748 | 16.57915256 | 3.0051  | 8.5211E-09 | 6.313E-07 |
| hsa_circ_0007411   | 3.13071089  | 53.09042066 | -4.018  | 8.5228E-09 | 6.313E-07 |
| hsa_circ_0000982   | 1.166585668 | 56.60167487 | -5.2598 | 9.187E-09  | 6.599E-07 |
| hsa_circ_0001535   | 58.39562399 | 401.7510232 | -2.7598 | 9.6005E-09 | 6.792E-07 |
| hsa_circ_0001648   | 0.765738012 | 55.54145825 | -6.0615 | 1.0264E-08 | 7.153E-07 |
| hsa_circ_0001577   | 2.315192685 | 51.87550246 | -4.3459 | 1.0863E-08 | 7.246E-07 |
| hsa_circ_0004592   | 5.470793671 | 60.94654371 | -3.4205 | 1.0747E-08 | 7.246E-07 |
| novel_circ_0015652 | 0.815518204 | 54.87366622 | -6.0376 | 1.0776E-08 | 7.246E-07 |
| hsa_circ_0058493   | 1030.497071 | 233.6923708 | 2.1315  | 1.58E-08   | 1.039E-06 |
| hsa_circ_0001358   | 6.602848389 | 69.16490707 | -3.3427 | 1.6877E-08 | 1.094E-06 |
| hsa_circ_0004833   | 150.4221602 | 24.18317954 | 2.6141  | 2.3642E-08 | 1.512E-06 |
| hsa_circ_0001518   | 8.334748241 | 92.13814203 | -3.4197 | 2.699E-08  | 1.68E-06  |
| hsa_circ_0002988   | 101.6811462 | 15.28751284 | 2.7172  | 2.6695E-08 | 1.68E-06  |
| hsa_circ_0007313   | 114.8397659 | 11.34733082 | 3.2968  | 2.7454E-08 | 1.687E-06 |
| novel_circ_0009625 | 38.3204458  | 1.134345225 | 4.9337  | 3.05E-08   | 1.849E-06 |
| novel_circ_0010112 | 85.5048997  | 5.755221575 | 3.8558  | 3.2347E-08 | 1.936E-06 |
| hsa_circ_0092166   | 42.38148452 | 2.017406022 | 4.435   | 3.546E-08  | 2.096E-06 |
| hsa_circ_0001772   | 66.59512741 | 391.4910073 | -2.5413 | 3.7183E-08 | 2.17E-06  |
| hsa_circ_0004771   | 20.18165003 | 180.3963371 | -3.1328 | 4.5167E-08 | 2.604E-06 |
| hsa_circ_0035943   | 46.65246463 | 4.983274682 | 3.2003  | 5.0634E-08 | 2.883E-06 |
| novel_circ_0020660 | 1.93232368  | 41.83498249 | -4.2658 | 5.3856E-08 | 3.03E-06  |
| novel_circ_0021918 | 18.41391617 | 124.5668213 | -2.7535 | 5.8455E-08 | 3.249E-06 |
| hsa_circ_0000397   | 0.583292834 | 47.77123845 | -5.8969 | 5.9322E-08 | 3.259E-06 |
| hsa_circ_0002024   | 8.307128736 | 101.7715729 | -3.5987 | 6.7435E-08 | 3.661E-06 |
| hsa_circ_0087243   | 0.765738012 | 44.74012596 | -5.7584 | 7.9579E-08 | 4.271E-06 |
| hsa_circ_0025006   | 39.06559904 | 2.816001731 | 3.797   | 8.3467E-08 | 4.429E-06 |
| hsa_circ_0001789   | 35.72339712 | 201.9669378 | -2.4882 | 9.1283E-08 | 4.789E-06 |
| hsa_circ_0068610   | 106.8492707 | 11.07230649 | 3.2463  | 1.2118E-07 | 6.287E-06 |
| hsa_circ_0006848   | 8.359638337 | 60.1016094  | -2.813  | 1.234E-07  | 6.331E-06 |
| hsa_circ_0001023   | 0.815518204 | 45.41146699 | -5.7487 | 1.4012E-07 | 7.111E-06 |
| hsa_circ_0000782   | 9.350690273 | 69.67426342 | -2.8607 | 1.4481E-07 | 7.193E-06 |
| hsa_circ_0004552   | 59.10622001 | 4.833407753 | 3.6218  | 1.4375E-07 | 7.193E-06 |
| hsa_circ_0014613   | 124.7655608 | 25.96140535 | 2.2497  | 1.4743E-07 | 7.246E-06 |
| hsa_circ_0006332   | 53.6229065  | 2.604439968 | 4.2786  | 1.5167E-07 | 7.377E-06 |
| hsa_circ_0006556   | 4.212985415 | 42.58706805 | -3.2948 | 1.5804E-07 | 7.607E-06 |
| hsa_circ_0005379   | 11.6976845  | 71.04133094 | -2.587  | 1.6515E-07 | 7.868E-06 |
| hsa_circ_0004293   | 2.038795511 | 54.84410848 | -4.7541 | 1.6744E-07 | 7.897E-06 |
| novel_circ_0016279 | 7.544120133 | 58.85163163 | -2.9194 | 1.7238E-07 | 8.048E-06 |
| hsa_circ_0003441   | 7.834340199 | 81.84619868 | -3.3482 | 2.0001E-07 | 9.07E-06  |
| novel_circ_0009897 | 34.3051548  | 1.932940934 | 4.0296  | 2.0008E-07 | 9.07E-06  |
| novel_circ_0021213 | 33.35281585 | 1.00724855  | 5.0532  | 1.9937E-07 | 9.07E-06  |
| novel_circ_0005300 | 45.06702638 | 4.415132429 | 3.3238  | 2.2103E-07 | 9.923E-06 |
| hsa_circ_0008803   | 61.82216334 | 7.818168105 | 2.9525  | 2.3581E-07 | 1.049E-05 |
| hsa_circ_0007185   | 40.80559011 | 3.174521502 | 3.624   | 2.4783E-07 | 1.092E-05 |
| hsa_circ_0000497   | 7.042409034 | 70.63822675 | -3.3173 | 2.6481E-07 | 1.156E-05 |
| hsa_circ_0007379   | 168.1422793 | 39.65269641 | 2.0743  | 2.9096E-07 | 1.258E-05 |
| hsa_circ_0001434   | 10.35829451 | 67.28800114 | -2.6657 | 3.0378E-07 | 1.301E-05 |
| hsa_circ_0008833   | 17.53897692 | 125.4250336 | -2.8317 | 3.1623E-07 | 1.342E-05 |
| hsa_circ_0004127   | 7.108741526 | 58.66090084 | -3.0517 | 3.3171E-07 | 1.383E-05 |
| novel_circ_0009164 | 3.162512432 | 47.25348491 | -3.9222 | 3.3121E-07 | 1.383E-05 |
| hsa_circ_0005505   | 2.389862974 | 37.29372303 | -3.8689 | 3.8333E-07 | 1.584E-05 |
| hsa_circ_0000347   | 18.73045268 | 130.7789132 | -2.7911 | 4.0187E-07 | 1.633E-05 |
| hsa_circ_0047505   | 36.38824541 | 1.010157472 | 5.152   | 4.0219E-07 | 1.633E-05 |
| hsa_circ_0087357   | 13.5000726  | 100.6305791 | -2.8436 | 4.4214E-07 | 1.78E-05  |
| hsa_circ_0006417   | 145.9102471 | 20.53417616 | 2.7995  | 4.5229E-07 | 1.805E-05 |
| novel_circ_0021473 | 39.74281759 | 0.694269288 | 5.4109  | 4.637E-07  | 1.835E-05 |

|                    |             |             |         |             |           |
|--------------------|-------------|-------------|---------|-------------|-----------|
| hsa_circ_0001684   | 6.250354575 | 114.3186317 | -4.1466 | 5.1263E-07  | 2.011E-05 |
| novel_circ_0009890 | 30.95055634 | 1.701517838 | 4.0817  | 5.4248E-07  | 2.111E-05 |
| hsa_circ_0000236   | 1.223277306 | 34.28522278 | -4.8284 | 6.0946E-07  | 2.352E-05 |
| hsa_circ_0001829   | 56.61967563 | 267.9171322 | -2.2263 | 6.2437E-07  | 2.39E-05  |
| hsa_circ_0017586   | 1.166585668 | 34.77568743 | -4.5749 | 6.4965E-07  | 2.427E-05 |
| hsa_circ_0037130   | 135.8964785 | 17.27518957 | 2.9357  | 6.4457E-07  | 2.427E-05 |
| hsa_circ_0046178   | 58.29921545 | 7.821077026 | 2.8624  | 6.4597E-07  | 2.427E-05 |
| hsa_circ_0000099   | 0.765738012 | 34.24162156 | -5.3764 | 6.5784E-07  | 2.438E-05 |
| hsa_circ_0007803   | 1.398811038 | 33.64716005 | -4.4697 | 7.3264E-07  | 2.694E-05 |
| hsa_circ_0085439   | 2.333171336 | 58.71580819 | -4.4104 | 7.4705E-07  | 2.725E-05 |
| hsa_circ_0001798   | 2.406415274 | 35.99449775 | -3.8083 | 7.8951E-07  | 2.858E-05 |
| hsa_circ_0008230   | 1.166585668 | 33.06738211 | -4.5036 | 8.7561E-07  | 3.145E-05 |
| hsa_circ_0000475   | 2.389862974 | 37.49461875 | -3.8724 | 9.8153E-07  | 3.498E-05 |
| hsa_circ_0000110   | 20.52044424 | 514.0703751 | -4.5261 | 1.0192E-06  | 3.551E-05 |
| hsa_circ_0003179   | 12.48973896 | 99.15307037 | -2.9504 | 1.0179E-06  | 3.551E-05 |
| hsa_circ_0050119   | 144.9014631 | 30.161269   | 2.2589  | 1.0039E-06  | 3.551E-05 |
| hsa_circ_0001112   | 24.87849118 | 111.1132723 | -2.1444 | 0.000001084 | 3.749E-05 |
| hsa_circ_0007641   | 6.188177841 | 63.0506972  | -3.2588 | 1.1399E-06  | 3.914E-05 |
| novel_circ_0010906 | 30.49304332 | 1.00724855  | 4.9032  | 1.1754E-06  | 4.006E-05 |
| hsa_circ_0000344   | 44.54448393 | 225.0150669 | -2.3198 | 1.2028E-06  | 4.069E-05 |
| hsa_circ_0001639   | 0.765738012 | 30.99022054 | -5.244  | 0.000001315 | 4.417E-05 |
| hsa_circ_0004368   | 44.44647318 | 180.3157912 | -2.0066 | 1.3437E-06  | 4.481E-05 |
| hsa_circ_0031319   | 27.00017149 | 0.925692384 | 4.4972  | 1.3766E-06  | 4.537E-05 |
| novel_circ_0016663 | 2.565396706 | 39.29206581 | -3.7911 | 1.3798E-06  | 4.537E-05 |
| hsa_circ_0008093   | 0.583292834 | 32.36341642 | -5.3506 | 1.4736E-06  | 4.811E-05 |
| novel_circ_0013936 | 541.6111883 | 134.5398286 | 2.0005  | 1.5772E-06  | 5.114E-05 |
| novel_circ_0002419 | 59.07043856 | 4.07453471  | 3.7839  | 1.6528E-06  | 5.322E-05 |
| hsa_circ_0003652   | 1.148607018 | 31.42174126 | -4.7159 | 1.6809E-06  | 5.375E-05 |
| hsa_circ_0000072   | 4.56132347  | 51.5544691  | -3.4874 | 1.7752E-06  | 5.638E-05 |
| hsa_circ_0014611   | 66.42517579 | 12.11105206 | 2.4427  | 1.8092E-06  | 5.708E-05 |
| novel_circ_0000163 | 1.148607018 | 34.60933662 | -4.8395 | 1.8372E-06  | 5.757E-05 |
| hsa_circ_0017523   | 27.39553405 | 0.462846192 | 5.3934  | 1.8585E-06  | 5.785E-05 |
| hsa_circ_0025843   | 0           | 115.767585  | -9.6453 | 0.000001997 | 6.175E-05 |
| hsa_circ_0024193   | 3.372577114 | 48.02286599 | -3.7259 | 2.2593E-06  | 6.94E-05  |
| novel_circ_0011611 | 5.761013738 | 86.22498589 | -3.8353 | 2.5038E-06  | 7.641E-05 |
| hsa_circ_0071311   | 76.38938451 | 14.01734418 | 2.4383  | 2.5277E-06  | 7.663E-05 |
| hsa_circ_0009034   | 6.659540028 | 64.96342015 | -3.2694 | 2.5457E-06  | 7.668E-05 |
| hsa_circ_0023923   | 10.59194623 | 83.07986411 | -2.9249 | 0.000002602 | 7.788E-05 |
| novel_circ_0009216 | 1.223277306 | 37.81696485 | -4.9203 | 2.6962E-06  | 8.018E-05 |
| novel_circ_0003380 | 2.315192685 | 32.09420994 | -3.6616 | 2.9408E-06  | 8.69E-05  |
| hsa_circ_0003395   | 26.34363471 | 1.809722821 | 3.819   | 3.0589E-06  | 8.882E-05 |
| hsa_circ_0005288   | 0.815518204 | 27.07685888 | -5.0433 | 3.0529E-06  | 8.882E-05 |
| novel_circ_0022226 | 22.54804925 | 1.134345225 | 4.1847  | 3.0627E-06  | 8.882E-05 |
| novel_circ_0004795 | 1.349030846 | 28.73363429 | -4.2612 | 3.2317E-06  | 9.314E-05 |
| hsa_circ_0000793   | 91.13634774 | 21.01996416 | 2.1136  | 0.000003298 | 9.447E-05 |
| novel_circ_0002098 | 90.91934533 | 13.76121155 | 2.7132  | 3.3417E-06  | 9.514E-05 |
| novel_circ_0008783 | 0           | 102.8521329 | -9.4869 | 3.4523E-06  | 9.769E-05 |
| hsa_circ_0008967   | 1.581256216 | 26.17490639 | -4.0754 | 3.5687E-06  | 0.0001004 |
| hsa_circ_0006258   | 31.16062102 | 150.7625451 | -2.2503 | 4.0169E-06  | 0.0001104 |
| hsa_circ_0008717   | 25.6469586  | 1.701517838 | 3.8157  | 3.9793E-06  | 0.0001104 |
| novel_circ_0005872 | 87.70976395 | 2.685996134 | 4.914   | 4.0177E-06  | 0.0001104 |
| novel_circ_0010089 | 22.26331428 | 0.462846192 | 5.102   | 3.9878E-06  | 0.0001104 |
| hsa_circ_0008207   | 22.90329876 | 97.34671145 | -2.0812 | 4.2249E-06  | 0.0001154 |
| hsa_circ_0000095   | 7710.941587 | 756.2260368 | 3.301   | 4.4411E-06  | 0.0001206 |
| hsa_circ_0000612   | 0.583292834 | 25.5820546  | -5.0249 | 4.5052E-06  | 0.0001216 |
| hsa_circ_0006054   | 23.71881696 | 1.010157472 | 4.5617  | 4.5537E-06  | 0.0001222 |
| hsa_circ_0003045   | 1.166585668 | 28.35719247 | -4.2902 | 4.7871E-06  | 0.0001277 |
| novel_circ_0016751 | 0.874939251 | 27.43361092 | -4.6059 | 4.8336E-06  | 0.0001282 |
| hsa_circ_0003142   | 112.1182667 | 24.83578688 | 2.1582  | 5.0478E-06  | 0.0001332 |
| hsa_circ_0001222   | 52.01836239 | 4.12395378  | 3.5289  | 5.1151E-06  | 0.0001342 |
| hsa_circ_0032965   | 1.166585668 | 27.20298591 | -4.2301 | 5.1905E-06  | 0.0001354 |
| hsa_circ_0000211   | 9.065955302 | 56.85876359 | -2.6427 | 0.000005392 | 0.0001391 |
| hsa_circ_0001617   | 4.645634613 | 34.28910135 | -2.8592 | 5.3748E-06  | 0.0001391 |
| hsa_circ_0000711   | 29.98166509 | 122.8732322 | -2.0226 | 5.6444E-06  | 0.0001448 |
| hsa_circ_0019170   | 0.765738012 | 24.90958593 | -4.9352 | 5.7114E-06  | 0.0001457 |

|                    |             |             |         |             |           |
|--------------------|-------------|-------------|---------|-------------|-----------|
| hsa_circ_0001551   | 3.788674013 | 40.83710079 | -3.3587 | 6.3346E-06  | 0.0001607 |
| hsa_circ_0025887   | 3.795585459 | 34.83641263 | -3.2055 | 6.7815E-06  | 0.0001712 |
| novel_circ_0007826 | 93.43896803 | 11.76560614 | 2.9577  | 0.000007193 | 0.0001806 |
| novel_circ_0018445 | 60.73585635 | 2.685996134 | 4.4337  | 7.4194E-06  | 0.0001853 |
| hsa_circ_0001746   | 13.41576146 | 77.09207825 | -2.479  | 7.7193E-06  | 0.000191  |
| hsa_circ_0007646   | 0.874939251 | 25.23015076 | -4.5004 | 7.7309E-06  | 0.000191  |
| novel_circ_0002443 | 27.57512652 | 2.06197689  | 3.569   | 8.0979E-06  | 0.000199  |
| hsa_circ_0006208   | 3.896448901 | 31.2017823  | -2.9682 | 9.2144E-06  | 0.0002253 |
| hsa_circ_0002058   | 541.6259256 | 122.5037032 | 2.13    | 9.8404E-06  | 0.0002393 |
| hsa_circ_0008620   | 0.583292834 | 30.04353917 | -5.2294 | 0.000009918 | 0.0002399 |
| hsa_circ_0001937   | 4.796278249 | 35.51275986 | -2.8282 | 0.000010085 | 0.0002415 |
| hsa_circ_0003184   | 143.0522708 | 41.11794295 | 1.7909  | 0.000010086 | 0.0002415 |
| hsa_circ_0000715   | 41.36541919 | 2.014497101 | 4.3226  | 0.00001019  | 0.0002427 |
| hsa_circ_0001520   | 8.508978915 | 101.2730215 | -3.5106 | 0.000010354 | 0.0002454 |
| hsa_circ_0000566   | 3.98767149  | 38.01351349 | -3.2149 | 0.000010688 | 0.000252  |
| novel_circ_0021868 | 2.505975659 | 35.94170123 | -3.7699 | 0.000010763 | 0.0002525 |
| novel_circ_0021952 | 10.68174247 | 53.71478301 | -2.3133 | 0.000010859 | 0.0002535 |
| hsa_circ_0000280   | 1.148607018 | 25.2632575  | -4.4075 | 0.000011005 | 0.0002556 |
| novel_circ_0012021 | 31.51444417 | 1.619961672 | 3.9992  | 0.000011152 | 0.0002578 |
| hsa_circ_0001924   | 0.815518204 | 23.08581962 | -4.8107 | 0.00001148  | 0.0002641 |
| hsa_circ_0078336   | 2.973155808 | 33.88891963 | -3.3956 | 0.000011555 | 0.0002645 |
| hsa_circ_0000175   | 21.86937807 | 98.59348333 | -2.166  | 0.000011659 | 0.0002655 |
| hsa_circ_0027904   | 19.88451851 | 0.671499034 | 4.8664  | 0.000012138 | 0.0002751 |
| hsa_circ_0017092   | 2.515616513 | 31.93480461 | -3.5075 | 0.000012425 | 0.0002803 |
| hsa_circ_0005325   | 1.93232368  | 31.93851162 | -3.8844 | 0.000013136 | 0.0002949 |
| hsa_circ_0005374   | 12.43162097 | 58.45870592 | -2.2058 | 0.000013565 | 0.0003028 |
| hsa_circ_0017521   | 49.52470443 | 2.9668383   | 3.9307  | 0.00001362  | 0.0003028 |
| hsa_circ_0001314   | 14.64452386 | 98.56634694 | -2.7201 | 0.000014009 | 0.0003071 |
| hsa_circ_0004720   | 54.77857454 | 10.42357771 | 2.3712  | 0.000013986 | 0.0003071 |
| hsa_circ_0006801   | 1.223277306 | 28.18294557 | -4.5217 | 0.000013955 | 0.0003071 |
| hsa_circ_0002103   | 21.11197786 | 107.4300075 | -2.34   | 0.000014456 | 0.000315  |
| novel_circ_0018049 | 1.223277306 | 24.2787792  | -4.3348 | 0.000014503 | 0.000315  |
| novel_circ_0001642 | 79.76216376 | 3.021745651 | 4.6129  | 0.000014668 | 0.0003171 |
| hsa_circ_0006856   | 40.30818434 | 216.4883602 | -2.4111 | 0.000014769 | 0.0003178 |
| hsa_circ_0007088   | 3.830116409 | 29.83230697 | -2.9059 | 0.000015434 | 0.0003306 |
| hsa_circ_0000091   | 13.47518251 | 77.5922393  | -2.474  | 0.000015638 | 0.0003334 |
| hsa_circ_0005204   | 180.3509822 | 22.10973852 | 2.9956  | 0.000016008 | 0.0003397 |
| hsa_circ_0044177   | 490.4702298 | 144.4028958 | 1.7581  | 0.000016415 | 0.0003468 |
| hsa_circ_0002926   | 139.8206257 | 35.62531193 | 1.9627  | 0.000016709 | 0.0003468 |
| hsa_circ_0005630   | 1.223277306 | 23.85485759 | -4.3042 | 0.000016607 | 0.0003468 |
| novel_circ_0010988 | 0.874939251 | 22.81547194 | -4.3567 | 0.00001652  | 0.0003468 |
| novel_circ_0013051 | 3.190131936 | 38.85650851 | -3.469  | 0.000016714 | 0.0003468 |
| hsa_circ_0002940   | 5.88689057  | 62.66793642 | -3.3441 | 0.000017102 | 0.0003533 |
| hsa_circ_0017310   | 8.421788791 | 110.3686008 | -3.6018 | 0.000017444 | 0.0003588 |
| hsa_circ_0000914   | 190.953933  | 47.80581595 | 1.9913  | 0.000017636 | 0.0003612 |
| hsa_circ_0006345   | 163.6721966 | 30.2626865  | 2.4208  | 0.000017963 | 0.0003662 |
| hsa_circ_0003472   | 790.5756557 | 225.6901204 | 1.7986  | 0.000018129 | 0.000367  |
| hsa_circ_0003644   | 6.568317439 | 44.26243819 | -2.7398 | 0.000018156 | 0.000367  |
| novel_circ_0001346 | 23.44099344 | 0.925692384 | 4.2949  | 0.00001853  | 0.0003729 |
| hsa_circ_0000209   | 1.166585668 | 27.72769849 | -4.2496 | 0.000020068 | 0.0004021 |
| hsa_circ_0001264   | 7.933900584 | 44.12062536 | -2.4665 | 0.000021162 | 0.0004204 |
| novel_circ_0013934 | 81.18566276 | 18.99964922 | 2.0891  | 0.000021142 | 0.0004204 |
| hsa_circ_0000607   | 0           | 63.6173687  | -8.8906 | 0.000021331 | 0.000422  |
| novel_circ_0010086 | 0           | 64.64077158 | -8.8979 | 0.000021524 | 0.000424  |
| hsa_circ_0015124   | 29.60568125 | 1.342998067 | 4.4279  | 0.000022322 | 0.0004379 |
| hsa_circ_0001436   | 92.43948129 | 16.48047243 | 2.455   | 0.000022817 | 0.0004458 |
| novel_circ_0020459 | 19.04138081 | 1.00724855  | 4.2552  | 0.000022973 | 0.0004469 |
| hsa_circ_0012883   | 22.42359877 | 1.680686865 | 3.7756  | 0.000023342 | 0.0004522 |
| hsa_circ_0008874   | 25.36495304 | 1.342998067 | 4.2314  | 0.000025321 | 0.0004885 |
| hsa_circ_0002775   | 2.223970097 | 27.13079659 | -3.4435 | 0.000026179 | 0.000503  |
| novel_circ_0005095 | 2.315192685 | 28.43116307 | -3.4847 | 0.000026364 | 0.0005045 |
| hsa_circ_0028381   | 45.54660307 | 2.350246618 | 4.2201  | 0.000027982 | 0.0005333 |
| hsa_circ_0008935   | 2.315192685 | 28.33909887 | -3.4932 | 0.00002825  | 0.0005362 |
| novel_circ_0000610 | 57.29416477 | 4.58292141  | 3.517   | 0.0000284   | 0.0005368 |
| novel_circ_0010762 | 0           | 56.90447565 | -8.7518 | 0.000032106 | 0.0006044 |

|                    |             |             |         |             |           |
|--------------------|-------------|-------------|---------|-------------|-----------|
| novel_circ_0021145 | 46.22399747 | 0           | 8.7368  | 0.000032709 | 0.0006133 |
| hsa_circ_0003788   | 2.389862974 | 24.23711725 | -3.254  | 0.000033035 | 0.0006164 |
| novel_circ_0009884 | 22.12373785 | 1.342998067 | 4.0517  | 0.000033134 | 0.0006164 |
| hsa_circ_0002490   | 475.4364726 | 104.4666063 | 2.1714  | 0.000034067 | 0.0006312 |
| hsa_circ_0008951   | 0.583292834 | 20.1985982  | -4.6851 | 0.000034741 | 0.0006408 |
| hsa_circ_0054886   | 7.792897803 | 48.17900574 | -2.6037 | 0.000034996 | 0.0006408 |
| novel_circ_0004646 | 45.98616371 | 0           | 8.7229  | 0.000034871 | 0.0006408 |
| hsa_circ_0005548   | 46.57912368 | 0           | 8.7262  | 0.000035321 | 0.0006442 |
| novel_circ_0001335 | 26.41269661 | 2.352185898 | 3.5194  | 0.000035735 | 0.0006492 |
| hsa_circ_0004877   | 1.166585668 | 22.27849714 | -3.9455 | 0.000036288 | 0.0006567 |
| hsa_circ_0001501   | 1.80657014  | 24.12714454 | -3.6676 | 0.000037549 | 0.0006769 |
| hsa_circ_0026233   | 0.815518204 | 22.15219855 | -4.731  | 0.000038636 | 0.0006938 |
| hsa_circ_0020028   | 0           | 52.9064909  | -8.6678 | 0.00003959  | 0.0007082 |
| novel_circ_0021440 | 0           | 52.52051068 | -8.6637 | 0.000039925 | 0.0007115 |
| hsa_circ_0000390   | 0           | 56.01256268 | -8.6973 | 0.000040398 | 0.0007118 |
| hsa_circ_0039100   | 16.76763052 | 1.134345225 | 3.7573  | 0.000040344 | 0.0007118 |
| novel_circ_0004161 | 0.583292834 | 18.45718614 | -4.5689 | 0.00004026  | 0.0007118 |
| hsa_circ_0001073   | 40.50848487 | 194.0598843 | -2.2469 | 0.000041565 | 0.0007296 |
| hsa_circ_0003571   | 133.3409429 | 21.84778805 | 2.5921  | 0.000042015 | 0.0007347 |
| hsa_circ_0000295   | 28.58831287 | 2.630119143 | 3.3126  | 0.000043324 | 0.0007548 |
| hsa_circ_0019607   | 1.166585668 | 23.01556957 | -3.9877 | 0.000043504 | 0.0007551 |
| hsa_circ_0000672   | 90.97997243 | 8.522133797 | 3.3443  | 0.00004442  | 0.0007681 |
| novel_circ_0018060 | 2.114768857 | 23.69853274 | -3.4135 | 0.000044966 | 0.0007747 |
| hsa_circ_0023919   | 630.7706262 | 197.7066269 | 1.6671  | 0.000045478 | 0.0007806 |
| hsa_circ_0059074   | 73.82268475 | 10.06117938 | 2.8403  | 0.000045721 | 0.0007819 |
| novel_circ_0020615 | 1.148607018 | 29.67388483 | -4.5726 | 0.000045927 | 0.0007826 |
| hsa_circ_0048965   | 19.17820155 | 1.010157472 | 4.2528  | 0.000046187 | 0.0007839 |
| novel_circ_0007268 | 30.24969819 | 2.06197689  | 3.7073  | 0.000046338 | 0.0007839 |
| hsa_circ_0030254   | 0           | 49.97937527 | -8.5949 | 0.000048769 | 0.000822  |
| hsa_circ_0008309   | 0           | 50.97872773 | -8.6045 | 0.000049377 | 0.0008293 |
| hsa_circ_0001726   | 0           | 49.08614954 | -8.5772 | 0.000050625 | 0.0008472 |
| hsa_circ_0001153   | 0.874939251 | 18.71137949 | -4.0773 | 0.000051014 | 0.0008507 |
| hsa_circ_0001614   | 0           | 48.61102759 | -8.5667 | 0.000052178 | 0.000858  |
| hsa_circ_0047270   | 1.223277306 | 21.19744955 | -4.1325 | 0.00005219  | 0.000858  |
| novel_circ_0007091 | 1.148607018 | 20.89868533 | -4.1293 | 0.00005219  | 0.000858  |
| novel_circ_0009562 | 16.77035992 | 0.671499034 | 4.6162  | 0.000051752 | 0.000858  |
| hsa_circ_0006978   | 0.815518204 | 19.12383697 | -4.5366 | 0.000053932 | 0.0008835 |
| hsa_circ_0008998   | 26.98634859 | 4.100213885 | 2.6428  | 0.000054146 | 0.0008839 |
| novel_circ_0015059 | 23.06228019 | 2.500113547 | 3.1101  | 0.00005597  | 0.0009105 |
| hsa_circ_0000831   | 6.702408774 | 64.5853957  | -3.208  | 0.000059282 | 0.0009512 |
| hsa_circ_0002457   | 5.186058701 | 34.22723496 | -2.7236 | 0.000059055 | 0.0009512 |
| novel_circ_0006472 | 16.22029498 | 0.694269288 | 4.1559  | 0.00005872  | 0.0009512 |
| novel_circ_0006637 | 43.87960936 | 2.350246618 | 4.1566  | 0.000059174 | 0.0009512 |
| hsa_circ_0000814   | 33.21311613 | 5.549477654 | 2.5538  | 0.000060096 | 0.0009609 |
| hsa_circ_0085440   | 2.515616513 | 28.6824475  | -3.3465 | 0.000063882 | 0.001018  |
| hsa_circ_0003871   | 0.583292834 | 19.11737905 | -4.6222 | 0.000067064 | 0.001065  |
| hsa_circ_0004524   | 0           | 45.37545133 | -8.4746 | 0.00006788  | 0.0010743 |
| hsa_circ_0007554   | 1.458232085 | 24.75229144 | -3.8102 | 0.000068273 | 0.0010769 |
| hsa_circ_0007332   | 0.583292834 | 17.22045378 | -4.4721 | 0.000069207 | 0.001088  |
| novel_circ_0008769 | 0           | 44.80827872 | -8.4595 | 0.000070606 | 0.0011062 |
| hsa_circ_0005689   | 1.166585668 | 19.847664   | -3.7878 | 0.000071005 | 0.0011088 |
| novel_circ_0009955 | 1.166585668 | 19.72153697 | -3.7773 | 0.00007328  | 0.0011405 |
| novel_circ_0002520 | 21.46301904 | 1.367707602 | 3.8224  | 0.000076862 | 0.0011923 |
| hsa_circ_0072758   | 27.67741632 | 4.62281563  | 2.59    | 0.000078338 | 0.0012111 |
| hsa_circ_0000652   | 4.413409243 | 29.65030294 | -2.6807 | 0.000078927 | 0.0012122 |
| novel_circ_0019508 | 0           | 46.64124032 | -8.4604 | 0.00007872  | 0.0012122 |
| hsa_circ_0068611   | 31.7978498  | 1.678747584 | 4.1914  | 0.000079699 | 0.0012201 |
| hsa_circ_0002965   | 14.49530658 | 0.462846192 | 4.501   | 0.000081779 | 0.0012437 |
| hsa_circ_0008774   | 52.92365056 | 9.981562495 | 2.3747  | 0.000081669 | 0.0012437 |
| novel_circ_0007532 | 18.79951458 | 1.932940934 | 3.1696  | 0.00008357  | 0.0012668 |
| hsa_circ_0084084   | 18.57550371 | 1.00724855  | 4.1913  | 0.000084669 | 0.0012752 |
| novel_circ_0009871 | 18.92526812 | 1.342998067 | 3.8325  | 0.000084598 | 0.0012752 |
| hsa_circ_0002968   | 20.54939308 | 83.22471129 | -1.9987 | 0.000085273 | 0.0012761 |
| hsa_circ_0025148   | 33.94014115 | 4.984244322 | 2.7361  | 0.000085274 | 0.0012761 |
| hsa_circ_0005496   | 15.00392912 | 0.694269288 | 4.044   | 0.000086659 | 0.0012927 |

|                    |             |             |         |             |           |
|--------------------|-------------|-------------|---------|-------------|-----------|
| hsa_circ_0005372   | 1.640677263 | 18.87740075 | -3.3687 | 0.00008823  | 0.0013036 |
| novel_circ_0001253 | 17.85679021 | 0.673438314 | 4.6779  | 0.000088226 | 0.0013036 |
| novel_circ_0011197 | 17.33437105 | 73.29999542 | -2.0637 | 0.000087929 | 0.0013036 |
| novel_circ_0007060 | 0           | 56.95603265 | -8.5424 | 0.000089146 | 0.001313  |
| hsa_circ_0001445   | 1.166585668 | 20.09603951 | -3.8084 | 0.000089965 | 0.0013209 |
| hsa_circ_0006373   | 9.083933952 | 45.8185942  | -2.3119 | 0.000090527 | 0.001325  |
| novel_circ_0016384 | 50.32903214 | 3.716014939 | 3.6893  | 0.000091195 | 0.0013306 |
| hsa_circ_0006687   | 1.631036409 | 22.80691673 | -3.8206 | 0.000092294 | 0.0013424 |
| novel_circ_0005061 | 1.223277306 | 18.71428841 | -3.964  | 0.000093695 | 0.0013586 |
| novel_circ_0003781 | 11.18906196 | 51.0292554  | -2.1796 | 0.00010044  | 0.0014518 |
| novel_circ_0002474 | 33.31267652 | 0           | 8.3258  | 0.00010161  | 0.0014642 |
| novel_circ_0019609 | 15.97557606 | 0.671499034 | 4.5222  | 0.00010722  | 0.0015403 |
| hsa_circ_0007865   | 32.73356572 | 0           | 8.2947  | 0.00011083  | 0.0015874 |
| hsa_circ_0007643   | 0           | 38.20052372 | -8.2716 | 0.00011165  | 0.0015942 |
| hsa_circ_0018992   | 0           | 38.4519797  | -8.2735 | 0.000112    | 0.0015943 |
| hsa_circ_0005227   | 4.529521928 | 28.36946824 | -2.5993 | 0.00011296  | 0.0016024 |
| novel_circ_0021439 | 0           | 38.32197411 | -8.2688 | 0.00011326  | 0.0016024 |
| hsa_circ_0000854   | 14.01287719 | 52.47109161 | -1.8887 | 0.00011496  | 0.0016167 |
| hsa_circ_0084143   | 4.612406721 | 39.1583532  | -3.0307 | 0.00011475  | 0.0016167 |
| hsa_circ_0074371   | 17.3357974  | 88.78197866 | -2.3273 | 0.00011568  | 0.001622  |
| novel_circ_0001647 | 31.78407947 | 0           | 8.259   | 0.00011926  | 0.0016672 |
| novel_circ_0010113 | 44.1201988  | 6.427690249 | 2.7537  | 0.00012146  | 0.0016928 |
| novel_circ_0010353 | 9.291269226 | 40.50522983 | -2.1114 | 0.00012425  | 0.0017266 |
| hsa_circ_0032969   | 1.964125222 | 21.75509731 | -3.4679 | 0.00012553  | 0.0017392 |
| hsa_circ_0003270   | 193.196102  | 55.00739237 | 1.8068  | 0.00013484  | 0.0018626 |
| novel_circ_0020469 | 15.6826003  | 0.462846192 | 4.6206  | 0.00013568  | 0.0018687 |
| hsa_circ_0003357   | 0           | 36.15179224 | -8.1931 | 0.00013685  | 0.0018793 |
| hsa_circ_0007099   | 854.4750214 | 271.62198   | 1.6457  | 0.00013826  | 0.0018931 |
| hsa_circ_0001654   | 7.44325669  | 37.86865277 | -2.3267 | 0.00014061  | 0.0019196 |
| hsa_circ_0008417   | 13.80554191 | 53.06217567 | -1.915  | 0.00014191  | 0.0019318 |
| hsa_circ_0070040   | 13.76137011 | 0.462846192 | 4.4211  | 0.00014258  | 0.0019352 |
| novel_circ_0011198 | 15.55269101 | 1.470094742 | 3.333   | 0.00014557  | 0.0019701 |
| hsa_circ_0005616   | 190.7784518 | 27.11060569 | 2.7795  | 0.00014655  | 0.0019719 |
| hsa_circ_0030253   | 28.83578748 | 122.8021514 | -2.0658 | 0.0001462   | 0.0019719 |
| novel_circ_0009887 | 19.77674362 | 2.037267355 | 3.2153  | 0.00014742  | 0.0019779 |
| hsa_circ_0006887   | 0.765738012 | 15.43350121 | -4.2614 | 0.00014976  | 0.0020036 |
| novel_circ_0018694 | 0           | 34.45398141 | -8.1435 | 0.00015164  | 0.0020229 |
| hsa_circ_0000274   | 64.11271251 | 14.10454663 | 2.1482  | 0.00015479  | 0.0020591 |
| novel_circ_0006235 | 28.74586795 | 0           | 8.1415  | 0.00015679  | 0.0020797 |
| hsa_circ_0002138   | 1.631036409 | 20.9432562  | -3.7033 | 0.00016051  | 0.002123  |
| hsa_circ_0015335   | 20.77052497 | 1.809722821 | 3.4697  | 0.00016205  | 0.0021373 |
| hsa_circ_0001098   | 0           | 33.48662708 | -8.1056 | 0.00016558  | 0.0021716 |
| novel_circ_0018138 | 7.133631622 | 35.38452199 | -2.3245 | 0.00016518  | 0.0021716 |
| novel_circ_0018167 | 0           | 34.62308314 | -8.1246 | 0.00016653  | 0.002178  |
| hsa_circ_0000019   | 33.61135767 | 6.197236793 | 2.4401  | 0.00016893  | 0.0021809 |
| hsa_circ_0000023   | 7.334055451 | 37.5543743  | -2.3505 | 0.00016728  | 0.0021809 |
| hsa_circ_0001635   | 1.690457455 | 17.59883488 | -3.2709 | 0.00016821  | 0.0021809 |
| hsa_circ_0003258   | 6.461845608 | 32.77540538 | -2.2881 | 0.00016909  | 0.0021809 |
| hsa_circ_0007383   | 1.964125222 | 19.16937748 | -3.3116 | 0.00016871  | 0.0021809 |
| hsa_circ_0003945   | 43.71526612 | 10.42454735 | 2.0513  | 0.00016991  | 0.0021854 |
| hsa_circ_0054853   | 0.583292834 | 15.40491311 | -4.3159 | 0.00017051  | 0.0021871 |
| novel_circ_0014471 | 192.1834433 | 22.82353958 | 3.024   | 0.00017512  | 0.0022401 |
| novel_circ_0002316 | 13.78756326 | 0.694269288 | 3.9226  | 0.00017877  | 0.0022805 |
| novel_circ_0017886 | 0           | 32.03736331 | -8.0531 | 0.00018658  | 0.0023737 |
| hsa_circ_0001367   | 1.458232085 | 21.88413327 | -3.6276 | 0.00018746  | 0.0023784 |
| novel_circ_0010426 | 34.84973465 | 4.305957806 | 2.9585  | 0.00019418  | 0.002457  |
| hsa_circ_0080835   | 0           | 32.02702682 | -8.0454 | 0.00019589  | 0.002472  |
| hsa_circ_0008426   | 1.989015318 | 17.99627923 | -3.2172 | 0.0001973   | 0.0024764 |
| novel_circ_0018542 | 15.92449281 | 1.00724855  | 3.9675  | 0.00019692  | 0.0024764 |
| hsa_circ_0003434   | 26.19847617 | 0           | 8.0205  | 0.00019992  | 0.0024957 |
| hsa_circ_0057657   | 1.148607018 | 16.33351442 | -3.7951 | 0.00019974  | 0.0024957 |
| hsa_circ_0018998   | 0           | 31.05482429 | -8.0142 | 0.00020524  | 0.0025553 |
| novel_circ_0009865 | 25.15215895 | 0           | 7.9834  | 0.00020995  | 0.0026071 |
| hsa_circ_0004860   | 22.80243531 | 4.079382912 | 2.4436  | 0.00021207  | 0.0026264 |
| hsa_circ_0004843   | 47.84657279 | 8.30184527  | 2.4735  | 0.00021364  | 0.0026389 |

|                    |             |             |         |            |           |
|--------------------|-------------|-------------|---------|------------|-----------|
| hsa_circ_0001685   | 0.874939251 | 15.49034784 | -3.8051 | 0.00021522 | 0.0026487 |
| novel_circ_0013810 | 25.57371466 | 0           | 7.996   | 0.00021557 | 0.0026487 |
| hsa_circ_0007798   | 2.098216557 | 21.99878263 | -3.3154 | 0.00021682 | 0.0026571 |
| hsa_circ_0001693   | 7.958790681 | 46.79547338 | -2.5395 | 0.00022149 | 0.0027001 |
| hsa_circ_0031607   | 0           | 30.3187215  | -7.9849 | 0.0002212  | 0.0027001 |
| novel_circ_0003231 | 16.67222589 | 0.925692384 | 3.8356  | 0.00022362 | 0.0027189 |
| hsa_circ_0087641   | 0           | 30.36038345 | -7.9824 | 0.00022597 | 0.0027404 |
| hsa_circ_0075501   | 26.45413901 | 3.044515905 | 3.0844  | 0.00022951 | 0.0027761 |
| novel_circ_0020352 | 13.94654469 | 1.00724855  | 3.8103  | 0.00023285 | 0.0028093 |
| hsa_circ_0003028   | 20.52307664 | 87.71040977 | -2.0809 | 0.00023474 | 0.0028248 |
| hsa_circ_0007716   | 2.038795511 | 24.27798111 | -3.5785 | 0.00023753 | 0.002851  |
| novel_circ_0013679 | 0           | 29.19956096 | -7.9379 | 0.00024295 | 0.0029084 |
| novel_circ_0014956 | 25.71053541 | 0           | 7.9782  | 0.00024356 | 0.0029084 |
| hsa_circ_0008415   | 17.20431218 | 0.462846192 | 4.7288  | 0.00025079 | 0.0029795 |
| hsa_circ_0069819   | 0           | 29.00689089 | -7.9288 | 0.00025022 | 0.0029795 |
| novel_circ_0019354 | 1.148607018 | 18.14146951 | -3.9096 | 0.00025257 | 0.002993  |
| hsa_circ_0009036   | 0.874939251 | 14.82078809 | -3.7438 | 0.00025703 | 0.0030382 |
| hsa_circ_0004270   | 0.583292834 | 15.76457408 | -4.3304 | 0.00026455 | 0.0031113 |
| novel_circ_0010101 | 46.26398724 | 3.021745651 | 3.8591  | 0.00026414 | 0.0031113 |
| hsa_circ_0008250   | 0           | 29.08667933 | -7.9092 | 0.00027224 | 0.0031937 |
| hsa_circ_0000862   | 26.45959783 | 0           | 7.9705  | 0.00027996 | 0.0032404 |
| hsa_circ_0001936   | 0           | 27.75029719 | -7.877  | 0.00027838 | 0.0032404 |
| hsa_circ_0004001   | 13.03837755 | 59.82802324 | -2.173  | 0.00028038 | 0.0032404 |
| novel_circ_0008880 | 0           | 28.12286045 | -7.8864 | 0.00027924 | 0.0032404 |
| novel_circ_0018673 | 0.765738012 | 13.80966098 | -4.1    | 0.00027765 | 0.0032404 |
| novel_circ_0020274 | 36.0328989  | 4.514610648 | 2.9522  | 0.0002774  | 0.0032404 |
| novel_circ_0020176 | 14.27272206 | 1.00724855  | 3.8377  | 0.00028143 | 0.0032445 |
| hsa_circ_0008836   | 117.4537367 | 29.75606753 | 1.968   | 0.00028439 | 0.0032704 |
| hsa_circ_0002458   | 0.583292834 | 15.26941924 | -4.3104 | 0.00029616 | 0.0033975 |
| novel_circ_0001763 | 504.1967779 | 33.04959902 | 3.8064  | 0.00029994 | 0.0034324 |
| hsa_circ_0003978   | 164.7200453 | 23.74923196 | 2.7547  | 0.00030099 | 0.003436  |
| hsa_circ_0001603   | 58.95690571 | 17.34076297 | 1.751   | 0.0003051  | 0.003469  |
| hsa_circ_0030608   | 32.01342586 | 6.891506081 | 2.2067  | 0.00030537 | 0.003469  |
| novel_circ_0019823 | 0           | 26.85028398 | -7.8333 | 0.00030847 | 0.0034958 |
| hsa_circ_0060762   | 1.458232085 | 21.20035847 | -3.5906 | 0.0003093  | 0.0034967 |
| hsa_circ_0003057   | 23.83763277 | 0           | 7.876   | 0.00031033 | 0.0034998 |
| hsa_circ_0001414   | 15.96317952 | 74.048848   | -2.1833 | 0.00031135 | 0.0035029 |
| hsa_circ_0078626   | 21.60677751 | 0           | 7.7969  | 0.00031233 | 0.0035054 |
| hsa_circ_0001051   | 0           | 26.38065031 | -7.8132 | 0.00031924 | 0.0035744 |
| novel_circ_0003666 | 1.989015318 | 17.65374223 | -3.183  | 0.00032224 | 0.0035994 |
| hsa_circ_0000119   | 2.91646417  | 39.81032046 | -3.5657 | 0.00032588 | 0.0036313 |
| hsa_circ_0007162   | 0           | 27.07896971 | -7.8229 | 0.00032842 | 0.003651  |
| hsa_circ_0000704   | 97.38792654 | 24.00569416 | 2.0074  | 0.0003316  | 0.0036721 |
| hsa_circ_0001181   | 9.692116882 | 41.85695466 | -2.0788 | 0.000333   | 0.0036721 |
| hsa_circ_0003234   | 1.631036409 | 20.45165036 | -3.6594 | 0.0003332  | 0.0036721 |
| hsa_circ_0028410   | 24.95173512 | 5.211788857 | 2.2264  | 0.00033347 | 0.0036721 |
| hsa_circ_0080285   | 12.64586769 | 0.694269288 | 3.7956  | 0.00033618 | 0.0036932 |
| hsa_circ_0005092   | 0           | 25.73676973 | -7.7815 | 0.00034397 | 0.003762  |
| hsa_circ_0050334   | 4.670524709 | 31.23310776 | -2.7157 | 0.00034405 | 0.003762  |
| hsa_circ_0007547   | 0.874939251 | 14.58548643 | -3.7209 | 0.00034591 | 0.0037735 |
| novel_circ_0002425 | 32.03280458 | 4.647525165 | 2.7463  | 0.00035555 | 0.0038696 |
| novel_circ_0000608 | 28.90209369 | 3.741694114 | 2.8981  | 0.00035808 | 0.0038881 |
| hsa_circ_0005398   | 0.815518204 | 13.52042161 | -4.0604 | 0.0003599  | 0.0038988 |
| hsa_circ_0005046   | 0.583292834 | 13.36667612 | -4.1183 | 0.00036186 | 0.0039019 |
| novel_circ_0005241 | 16.79940578 | 1.00724855  | 4.0323  | 0.00036181 | 0.0039019 |
| hsa_circ_0003513   | 8.886239532 | 43.41795887 | -2.234  | 0.00036904 | 0.003959  |
| hsa_circ_0008571   | 1.166585668 | 16.05752046 | -3.4843 | 0.0003697  | 0.003959  |
| hsa_circ_00087220  | 0           | 25.15893108 | -7.7506 | 0.00036936 | 0.003959  |
| hsa_circ_0006607   | 0.874939251 | 14.48019037 | -3.7123 | 0.00037148 | 0.003969  |
| novel_circ_0004757 | 0.874939251 | 14.4593594  | -3.7062 | 0.00038354 | 0.0040885 |
| novel_circ_0021217 | 13.87603016 | 0.671499034 | 4.3229  | 0.00038532 | 0.0040981 |
| hsa_circ_0002673   | 0           | 24.53023518 | -7.7182 | 0.00038948 | 0.0041049 |
| hsa_circ_0005593   | 33.35278957 | 6.578526819 | 2.3129  | 0.00038941 | 0.0041049 |
| hsa_circ_0025850   | 0           | 24.38601454 | -7.7185 | 0.00038819 | 0.0041049 |
| novel_circ_0004250 | 0.874939251 | 15.69512212 | -3.8219 | 0.00038732 | 0.0041049 |

|                    |             |             |         |            |           |
|--------------------|-------------|-------------|---------|------------|-----------|
| hsa_circ_0006473   | 0.765738012 | 14.59113272 | -4.1701 | 0.00039068 | 0.0041083 |
| hsa_circ_0045836   | 12.73433459 | 0.462846192 | 4.3337  | 0.00039431 | 0.0041279 |
| novel_circ_0001865 | 37.32378547 | 6.03315482  | 2.5686  | 0.00039351 | 0.0041279 |
| hsa_circ_0001402   | 8.26425999  | 79.44199531 | -3.2123 | 0.00040216 | 0.0042006 |
| hsa_circ_0006784   | 0           | 24.00375488 | -7.6951 | 0.00040783 | 0.0042503 |
| hsa_circ_0005501   | 0.815518204 | 13.26913718 | -4.0275 | 0.00041698 | 0.0043361 |
| hsa_circ_0063716   | 21.40780631 | 0           | 7.7249  | 0.00041843 | 0.0043415 |
| hsa_circ_0006318   | 27.42315355 | 3.092965335 | 3.0194  | 0.00042679 | 0.0044184 |
| novel_circ_0008779 | 0           | 23.52492591 | -7.6679 | 0.00042995 | 0.0044412 |
| hsa_circ_0001079   | 0           | 23.23083834 | -7.6586 | 0.00043522 | 0.0044826 |
| novel_circ_0012550 | 1.349030846 | 14.90605126 | -3.3404 | 0.00043587 | 0.0044826 |
| novel_circ_0003043 | 20.27560202 | 0           | 7.6823  | 0.00044232 | 0.0045389 |
| hsa_circ_0061395   | 0           | 25.09467043 | -7.706  | 0.00044402 | 0.0045463 |
| novel_circ_0015779 | 0.583292834 | 12.44583194 | -4.0146 | 0.00045299 | 0.0046281 |
| hsa_circ_0000279   | 0           | 23.70305138 | -7.6608 | 0.00045516 | 0.00464   |
| novel_circ_0006514 | 18.7524638  | 0           | 7.6162  | 0.00046487 | 0.0047287 |
| hsa_circ_0023883   | 33.97063964 | 6.553817284 | 2.3537  | 0.00046656 | 0.0047356 |
| hsa_circ_0004901   | 3.903360348 | 28.95295318 | -2.8929 | 0.0004731  | 0.0047806 |
| hsa_circ_0035228   | 0           | 23.51232059 | -7.6484 | 0.00047406 | 0.0047806 |
| novel_circ_0019368 | 1.80657014  | 16.70624924 | -3.1483 | 0.00047307 | 0.0047806 |
| hsa_circ_0007710   | 16.53540515 | 56.9210985  | -1.7705 | 0.00048484 | 0.0048682 |
| hsa_circ_0050386   | 17.20992057 | 2.942128765 | 2.5182  | 0.00048428 | 0.0048682 |
| novel_circ_0003933 | 0           | 22.77169916 | -7.6249 | 0.00048952 | 0.0049047 |
| hsa_circ_0001487   | 0           | 23.02589251 | -7.632  | 0.00049336 | 0.0049326 |
| novel_circ_0014749 | 5.846751231 | 30.43920225 | -2.297  | 0.00049639 | 0.0049523 |
| hsa_circ_0067864   | 38.06763566 | 9.49885497  | 1.9932  | 0.00050183 | 0.0049959 |
| hsa_circ_0026235   | 1.166585668 | 21.3715249  | -3.8912 | 0.00050405 | 0.0050072 |
| novel_circ_0003751 | 0           | 21.84036049 | -7.5791 | 0.00051042 | 0.0050597 |
| novel_circ_0022288 | 0           | 21.65059934 | -7.5695 | 0.00052435 | 0.0051869 |
| hsa_circ_0004961   | 41.10427126 | 9.685707198 | 2.0903  | 0.000528   | 0.0052119 |
| novel_circ_0012131 | 1.964125222 | 18.73723022 | -3.2481 | 0.00053056 | 0.0052261 |
| hsa_circ_0005583   | 0           | 21.69437212 | -7.5638 | 0.000532   | 0.0052293 |
| hsa_circ_0000660   | 0           | 22.35617475 | -7.5845 | 0.00053708 | 0.0052681 |
| hsa_circ_0012823   | 0           | 21.39640599 | -7.5516 | 0.00054444 | 0.0053291 |
| hsa_circ_0004314   | 0           | 21.56824508 | -7.5525 | 0.00054872 | 0.0053598 |
| hsa_circ_0000701   | 0           | 21.25429618 | -7.5406 | 0.00055475 | 0.0054073 |
| hsa_circ_0003428   | 0.815518204 | 12.76172012 | -3.9588 | 0.00056214 | 0.005468  |
| hsa_circ_0009033   | 32.82343269 | 5.548508014 | 2.5357  | 0.00056587 | 0.0054928 |
| hsa_circ_0031608   | 0           | 21.38703914 | -7.5471 | 0.00056863 | 0.0054967 |
| novel_circ_0019854 | 1.166585668 | 15.34903612 | -3.4335 | 0.0005685  | 0.0054967 |
| novel_circ_0010367 | 17.70056446 | 0           | 7.5258  | 0.00057567 | 0.0055533 |
| hsa_circ_0009110   | 0           | 20.77335638 | -7.5207 | 0.00057762 | 0.0055606 |
| hsa_circ_0003755   | 1.166585668 | 14.92705379 | -3.3807 | 0.00058012 | 0.0055732 |
| hsa_circ_0004417   | 0           | 20.6651514  | -7.5133 | 0.00058905 | 0.0056459 |
| novel_circ_0016280 | 0           | 20.51722375 | -7.5055 | 0.0005901  | 0.0056459 |
| novel_circ_0002466 | 16.86027946 | 0           | 7.4843  | 0.00059285 | 0.005649  |
| novel_circ_0020460 | 10.23254097 | 0.462846192 | 4.0157  | 0.00059172 | 0.005649  |
| novel_circ_0011151 | 17.18645682 | 2.81503209  | 2.6253  | 0.00059885 | 0.0056946 |
| novel_circ_0009862 | 16.63769494 | 0           | 7.4706  | 0.00061817 | 0.0058663 |
| novel_circ_0010555 | 48.62492765 | 14.71161347 | 1.717   | 0.00062567 | 0.0059221 |
| novel_circ_0013925 | 70.8066602  | 22.23586556 | 1.6729  | 0.00062658 | 0.0059221 |
| novel_circ_0013244 | 2.515616513 | 18.94280259 | -2.7649 | 0.00063092 | 0.0059511 |
| hsa_circ_0007848   | 0.583292834 | 12.08925145 | -3.9685 | 0.0006341  | 0.005969  |
| novel_circ_0011162 | 8.127412966 | 32.9023305  | -1.9768 | 0.00063567 | 0.0059717 |
| hsa_circ_0005347   | 1.166585668 | 14.59033463 | -3.3489 | 0.00064377 | 0.0060357 |
| novel_circ_0007773 | 0           | 19.8428158  | -7.4618 | 0.00064867 | 0.0060695 |
| novel_circ_0001665 | 16.67367852 | 0           | 7.4495  | 0.00065379 | 0.006105  |
| hsa_circ_0008952   | 2.098216557 | 16.16766472 | -2.8725 | 0.00066692 | 0.0062152 |
| hsa_circ_0001788   | 197.7738808 | 68.10680129 | 1.5342  | 0.00068425 | 0.0063514 |
| hsa_circ_0035292   | 0           | 19.47025254 | -7.4341 | 0.00068367 | 0.0063514 |
| hsa_circ_0008794   | 0           | 19.505127   | -7.4367 | 0.00068904 | 0.0063832 |
| hsa_circ_0001519   | 48.46319053 | 151.7923924 | -1.6325 | 0.00069449 | 0.0064209 |
| hsa_circ_0007683   | 15.19328575 | 59.28457698 | -1.9589 | 0.00069727 | 0.0064244 |
| hsa_circ_0074944   | 1.223277306 | 14.88054364 | -3.6096 | 0.00069762 | 0.0064244 |
| novel_circ_0017379 | 0           | 19.21588763 | -7.4214 | 0.00071342 | 0.006557  |

|                    |             |             |         |            |           |
|--------------------|-------------|-------------|---------|------------|-----------|
| hsa_circ_0045095   | 16.31700267 | 2.037267355 | 2.9284  | 0.00071526 | 0.006561  |
| hsa_circ_0000251   | 0.583292834 | 11.64335767 | -3.9192 | 0.00072363 | 0.0066248 |
| novel_circ_0007561 | 15.55960245 | 0           | 7.3789  | 0.00072589 | 0.0066324 |
| hsa_circ_0000972   | 2828.116454 | 1036.466067 | 1.4409  | 0.00073433 | 0.0066875 |
| hsa_circ_0005918   | 0           | 18.98463609 | -7.3973 | 0.00073765 | 0.0066875 |
| novel_circ_0001733 | 15.9687879  | 0           | 7.3976  | 0.00073715 | 0.0066875 |
| novel_circ_0014960 | 11.78472505 | 0.671499034 | 4.1011  | 0.00073615 | 0.0066875 |
| hsa_circ_0000356   | 0           | 18.87352219 | -7.3918 | 0.00074408 | 0.0067004 |
| hsa_circ_0002722   | 14.13863073 | 50.69206772 | -1.8145 | 0.00074533 | 0.0067004 |
| hsa_circ_0006783   | 1.166585668 | 14.59227392 | -3.3498 | 0.00074625 | 0.0067004 |
| hsa_circ_0008381   | 0           | 18.98252526 | -7.4033 | 0.0007439  | 0.0067004 |
| novel_circ_0011368 | 13.23880138 | 0.925692384 | 3.5044  | 0.00074113 | 0.0067004 |
| hsa_circ_0003525   | 12.0888913  | 1.134345225 | 3.288   | 0.00074982 | 0.0067196 |
| hsa_circ_0004870   | 0.583292834 | 11.71263807 | -3.9439 | 0.00075145 | 0.0067213 |
| hsa_circ_0001350   | 0           | 18.96186584 | -7.3895 | 0.00075766 | 0.006758  |
| hsa_circ_0001430   | 0           | 18.79972314 | -7.3863 | 0.00076098 | 0.006758  |
| hsa_circ_0006378   | 0           | 19.27387546 | -7.4    | 0.00075992 | 0.006758  |
| hsa_circ_0079449   | 1.148607018 | 17.66875536 | -3.8537 | 0.00076135 | 0.006758  |
| novel_circ_0013990 | 0.815518204 | 11.54194017 | -3.8304 | 0.00077201 | 0.0068397 |
| novel_circ_0019990 | 0           | 18.75013252 | -7.3856 | 0.00077375 | 0.0068421 |
| hsa_circ_0001322   | 0.874939251 | 12.44583194 | -3.4987 | 0.00077656 | 0.006854  |
| hsa_circ_0091365   | 0.583292834 | 11.4555358  | -3.9072 | 0.00077895 | 0.0068621 |
| hsa_circ_0017854   | 1.458232085 | 16.28894355 | -3.2151 | 0.0007862  | 0.0069129 |
| hsa_circ_0002553   | 0           | 18.12143663 | -7.3515 | 0.00079104 | 0.0069389 |
| hsa_circ_0069608   | 0           | 18.16406821 | -7.3559 | 0.00079361 | 0.0069389 |
| novel_circ_0013850 | 24.50253362 | 5.863426557 | 2.0726  | 0.00079269 | 0.0069389 |
| hsa_circ_0005289   | 14.7371728  | 0           | 7.322   | 0.00080345 | 0.0070118 |
| novel_circ_0014456 | 0           | 18.50757485 | -7.3643 | 0.00081069 | 0.0070618 |
| hsa_circ_0008621   | 1.148607018 | 13.41415591 | -3.5154 | 0.00081407 | 0.0070648 |
| hsa_circ_0010934   | 14.86019693 | 0           | 7.321   | 0.00081262 | 0.0070648 |
| hsa_circ_0077495   | 0           | 18.33573576 | -7.3592 | 0.00081886 | 0.0070801 |
| novel_circ_0000116 | 0           | 17.89098317 | -7.3347 | 0.00081747 | 0.0070801 |
| hsa_circ_0052877   | 25.94967222 | 5.110371357 | 2.3085  | 0.00082215 | 0.0070954 |
| novel_circ_0012462 | 0           | 18.16018965 | -7.3469 | 0.00082616 | 0.0071037 |
| novel_circ_0019152 | 10.39843385 | 0.671499034 | 3.9289  | 0.00082517 | 0.0071037 |
| novel_circ_0000126 | 1.223277306 | 13.24636693 | -3.4681 | 0.00084288 | 0.0072342 |
| hsa_circ_0054171   | 1.631036409 | 15.72274058 | -3.2988 | 0.00084455 | 0.0072352 |
| hsa_circ_0012144   | 29.60152549 | 7.590623571 | 1.9499  | 0.00084779 | 0.0072497 |
| hsa_circ_0007137   | 0           | 17.59786524 | -7.3172 | 0.0008533  | 0.0072835 |
| hsa_circ_0007192   | 14.8145725  | 1.346876629 | 3.468   | 0.00086719 | 0.0073886 |
| hsa_circ_0004431   | 0           | 18.10819122 | -7.335  | 0.0008754  | 0.0074178 |
| hsa_circ_0008350   | 3.221933479 | 19.52031168 | -2.5562 | 0.00087325 | 0.0074178 |
| hsa_circ_0029926   | 20.03112968 | 3.742663755 | 2.3716  | 0.00087407 | 0.0074178 |
| hsa_circ_0040414   | 181.8992207 | 69.28086918 | 1.3895  | 0.00087865 | 0.0074319 |
| novel_circ_0003047 | 12.92226486 | 1.00724855  | 3.6718  | 0.00088567 | 0.0074777 |
| novel_circ_0001353 | 27.79495535 | 3.484591843 | 2.9671  | 0.00088986 | 0.0074909 |
| novel_circ_0022222 | 10.18967222 | 0.671499034 | 3.8983  | 0.00089043 | 0.0074909 |
| novel_circ_0009396 | 0           | 17.43201554 | -7.294  | 0.00090103 | 0.0075664 |
| hsa_circ_0000564   | 0           | 17.33979333 | -7.292  | 0.00090326 | 0.0075715 |
| hsa_circ_0003823   | 0           | 17.32671948 | -7.2891 | 0.00090573 | 0.0075786 |
| hsa_circ_0037010   | 2.854313715 | 29.38253463 | -3.339  | 0.00091183 | 0.0075888 |
| hsa_circ_0077096   | 0           | 17.37032071 | -7.2935 | 0.00090879 | 0.0075888 |
| novel_circ_0016588 | 14.24783196 | 0           | 7.2754  | 0.0009105  | 0.0075888 |
| hsa_circ_0000605   | 0.583292834 | 12.06066335 | -3.9592 | 0.00091787 | 0.0076255 |
| hsa_circ_0007242   | 27.3084935  | 6.558665486 | 2.0454  | 0.00092213 | 0.0076473 |
| novel_circ_0013684 | 0           | 17.21269665 | -7.2805 | 0.00092456 | 0.0076538 |
| novel_circ_0021666 | 1.631036409 | 16.66635502 | -3.3724 | 0.00092816 | 0.0076701 |
| hsa_circ_0000592   | 0           | 17.06767793 | -7.2698 | 0.00093093 | 0.0076793 |
| novel_circ_0003610 | 21.61511531 | 4.307897087 | 2.2873  | 0.00093781 | 0.0077225 |
| novel_circ_0017571 | 0           | 17.50290566 | -7.2852 | 0.00094365 | 0.0077569 |
| hsa_circ_0024960   | 43.44432776 | 6.12343775  | 2.7727  | 0.00095067 | 0.0078009 |
| hsa_circ_0000051   | 0           | 16.79636061 | -7.2586 | 0.00095429 | 0.0078168 |
| hsa_circ_0004561   | 4.206073969 | 23.00329381 | -2.355  | 0.00095701 | 0.0078253 |
| hsa_circ_0066971   | 0           | 17.08463034 | -7.2645 | 0.00096631 | 0.0078876 |
| novel_circ_0001652 | 13.96036759 | 0           | 7.2342  | 0.00097576 | 0.0079094 |

|                    |             |             |         |            |           |
|--------------------|-------------|-------------|---------|------------|-----------|
| novel_circ_0004426 | 0           | 16.65231152 | -7.2452 | 0.00097214 | 0.0079094 |
| novel_circ_0008252 | 14.04883449 | 0           | 7.2519  | 0.00097305 | 0.0079094 |
| novel_circ_0014536 | 0           | 17.85884607 | -7.2992 | 0.00097532 | 0.0079094 |
| novel_circ_0013280 | 0           | 16.62663235 | -7.2404 | 0.00097954 | 0.0079263 |
| hsa_circ_0007976   | 0           | 16.63051091 | -7.2395 | 0.00098466 | 0.007954  |
| hsa_circ_0004132   | 1.640677263 | 14.06094541 | -2.9603 | 0.00099351 | 0.0079849 |
| hsa_circ_0008881   | 9.448824308 | 37.21781315 | -1.9799 | 0.00099363 | 0.0079849 |
| novel_circ_0017708 | 0           | 16.62469307 | -7.2375 | 0.00099289 | 0.0079849 |
| hsa_circ_0001317   | 0           | 17.0240767  | -7.2494 | 0.0010009  | 0.0080299 |
| hsa_circ_0002789   | 6.286311876 | 26.79149807 | -2.0657 | 0.0010136  | 0.0081082 |
| novel_circ_0017402 | 0           | 17.54295789 | -7.2791 | 0.0010142  | 0.0081082 |
| hsa_circ_0000502   | 0           | 18.87998011 | -7.3179 | 0.0010346  | 0.0082576 |
| hsa_circ_0003322   | 0           | 16.10500024 | -7.2078 | 0.0010408  | 0.0082925 |
| novel_circ_0022156 | 0           | 16.37631756 | -7.2131 | 0.0010445  | 0.0083076 |
| hsa_circ_0001177   | 0           | 16.50227304 | -7.2258 | 0.0010595  | 0.0083984 |
| novel_circ_0021516 | 9.958873203 | 0.673438314 | 3.8768  | 0.0010579  | 0.0083984 |
| hsa_circ_0001360   | 26.73899727 | 5.003136015 | 2.3634  | 0.0010791  | 0.0085392 |
| novel_circ_0014791 | 0           | 15.85274618 | -7.1841 | 0.0010872  | 0.0085888 |
| novel_circ_0004890 | 20.54666367 | 4.645585884 | 2.1092  | 0.0010891  | 0.0085895 |
| hsa_circ_0008282   | 57.43079149 | 12.18388146 | 2.218   | 0.0010961  | 0.0086303 |
| hsa_circ_0072780   | 0           | 16.91021188 | -7.2353 | 0.0011095  | 0.0087065 |
| novel_circ_0001732 | 13.0121844  | 0           | 7.1566  | 0.0011083  | 0.0087065 |
| hsa_circ_0006825   | 13.14757879 | 0           | 7.1704  | 0.0011122  | 0.008713  |
| novel_circ_0015097 | 7.385138701 | 32.51151562 | -2.104  | 0.0011237  | 0.0087882 |
| hsa_circ_0047705   | 1.166585668 | 13.13913158 | -3.2055 | 0.0011266  | 0.0087963 |
| hsa_circ_0001200   | 69.95240272 | 19.52806881 | 1.8395  | 0.0011421  | 0.0089022 |
| novel_circ_0009840 | 14.30176792 | 0           | 7.2315  | 0.0011447  | 0.0089073 |
| novel_circ_0020038 | 0           | 16.51357916 | -7.2018 | 0.001148   | 0.0089182 |
| hsa_circ_0000690   | 15.1173124  | 49.57370527 | -1.7165 | 0.0011544  | 0.0089388 |
| novel_circ_0015972 | 12.85462931 | 0           | 7.1406  | 0.0011544  | 0.0089388 |
| novel_circ_0016991 | 17.52776014 | 1.342998067 | 3.6617  | 0.0011584  | 0.0089546 |
| novel_circ_0022085 | 14.65140903 | 0           | 7.2448  | 0.0011603  | 0.0089546 |
| hsa_circ_0023891   | 9.274716926 | 46.21280006 | -2.2894 | 0.0011628  | 0.0089587 |
| novel_circ_0010818 | 0           | 17.10288195 | -7.2288 | 0.0011689  | 0.0089763 |
| novel_circ_0021264 | 16.52576429 | 50.03928883 | -1.5981 | 0.0011677  | 0.0089763 |
| hsa_circ_0069443   | 0           | 16.01101031 | -7.1694 | 0.0011769  | 0.0090233 |
| hsa_circ_0001516   | 0.815518204 | 13.15528591 | -3.9577 | 0.0011789  | 0.0090234 |
| novel_circ_0017847 | 12.6071547  | 0           | 7.1276  | 0.0011879  | 0.0090775 |
| hsa_circ_0005946   | 25.17429336 | 4.747973024 | 2.3861  | 0.0011986  | 0.009086  |
| novel_circ_0000570 | 0           | 15.88779219 | -7.1589 | 0.0011967  | 0.009086  |
| novel_circ_0002465 | 12.77031817 | 0           | 7.1243  | 0.0011988  | 0.009086  |
| novel_circ_0009629 | 12.67348719 | 0           | 7.1291  | 0.001196   | 0.009086  |
| novel_circ_0021529 | 15.24449229 | 2.016436382 | 2.9489  | 0.0011981  | 0.009086  |
| hsa_circ_0000418   | 22.70417799 | 105.9568403 | -2.1926 | 0.0012011  | 0.0090872 |
| hsa_circ_0002528   | 1.166585668 | 15.67074215 | -3.4588 | 0.0012028  | 0.0090872 |
| hsa_circ_0001246   | 0           | 15.15556797 | -7.126  | 0.0012096  | 0.0090945 |
| hsa_circ_0009144   | 0           | 15.25892475 | -7.1304 | 0.0012091  | 0.0090945 |
| hsa_circ_0044241   | 0           | 15.0740118  | -7.1257 | 0.0012073  | 0.0090945 |
| hsa_circ_0006374   | 0           | 15.37003865 | -7.1337 | 0.0012165  | 0.0091317 |
| novel_circ_0009893 | 13.02743364 | 0           | 7.1309  | 0.0012326  | 0.0092375 |
| novel_circ_0006234 | 13.0508711  | 0           | 7.1455  | 0.0012469  | 0.0093301 |
| hsa_circ_0001377   | 44.41454835 | 10.80971594 | 2.0017  | 0.0012684  | 0.0094453 |
| hsa_circ_0005656   | 9.150266445 | 0.671499034 | 3.7632  | 0.001268   | 0.0094453 |
| hsa_circ_0008382   | 0           | 14.96483718 | -7.1107 | 0.0012657  | 0.0094453 |
| hsa_circ_0070680   | 0           | 14.736323   | -7.0979 | 0.0012722  | 0.0094582 |
| hsa_circ_0000849   | 6.121845348 | 38.36266642 | -2.5611 | 0.0012767  | 0.0094768 |
| hsa_circ_0000024   | 28.97406085 | 88.04795411 | -1.5924 | 0.001284   | 0.0095157 |
| hsa_circ_0001405   | 0           | 14.63296622 | -7.0901 | 0.0012923  | 0.0095322 |
| hsa_circ_0007375   | 0           | 14.63296622 | -7.0901 | 0.0012923  | 0.0095322 |
| novel_circ_0001878 | 47.98754929 | 11.47636677 | 2.0307  | 0.0012923  | 0.0095322 |
| hsa_circ_0067772   | 0           | 14.61116561 | -7.0857 | 0.0012976  | 0.0095409 |
| novel_circ_0014737 | 1.148607018 | 15.40605431 | -3.6549 | 0.0012957  | 0.0095409 |
| novel_circ_0003507 | 0           | 15.56705581 | -7.1265 | 0.0013077  | 0.0096004 |
| hsa_circ_0003206   | 0.765738012 | 10.51095172 | -3.7065 | 0.0013154  | 0.0096086 |
| hsa_circ_0007542   | 0           | 14.50586955 | -7.0783 | 0.0013159  | 0.0096086 |

|                    |             |             |         |           |           |
|--------------------|-------------|-------------|---------|-----------|-----------|
| hsa_circ_0029703   | 4.255854161 | 26.15795398 | -2.5293 | 0.0013154 | 0.0096086 |
| novel_circ_0011710 | 12.89046332 | 0           | 7.1201  | 0.0013171 | 0.0096086 |
| novel_circ_0012423 | 0           | 14.69660034 | -7.082  | 0.0013259 | 0.009658  |
| hsa_circ_0069227   | 0           | 14.5656251  | -7.0678 | 0.0013633 | 0.0099067 |
| hsa_circ_0079799   | 0           | 14.57030175 | -7.0794 | 0.0013643 | 0.0099067 |
| hsa_circ_0004189   | 0           | 14.4642076  | -7.0619 | 0.0013729 | 0.0099082 |
| hsa_circ_0005653   | 0.583292834 | 11.95245837 | -3.9464 | 0.0013675 | 0.0099082 |
| novel_circ_0013486 | 38.10216661 | 11.09701603 | 1.7677  | 0.00137   | 0.0099082 |
| novel_circ_0015468 | 6.202000733 | 26.4974105  | -2.0973 | 0.001373  | 0.0099082 |
| novel_circ_0007941 | 11.97277862 | 0           | 7.0504  | 0.0013837 | 0.0099697 |
| hsa_circ_0013252   | 0           | 14.16915039 | -7.0497 | 0.0013873 | 0.0099721 |
| hsa_circ_0020506   | 0.874939251 | 11.35217902 | -3.381  | 0.0013883 | 0.0099721 |
| hsa_circ_0004405   | 0           | 14.14638014 | -7.0429 | 0.0014061 | 0.010054  |
| hsa_circ_0007180   | 3.937891298 | 25.90569991 | -2.6664 | 0.0014043 | 0.010054  |
| novel_circ_0013192 | 11.64790431 | 0           | 7.0266  | 0.0014061 | 0.010054  |
| hsa_circ_0026228   | 0           | 14.04302335 | -7.0366 | 0.0014181 | 0.010124  |
| novel_circ_0015098 | 1.690457455 | 14.75344697 | -2.9951 | 0.0014257 | 0.010142  |
| novel_circ_0018444 | 12.05839282 | 0           | 7.0562  | 0.0014239 | 0.010142  |
| novel_circ_0019852 | 0           | 14.65009019 | -7.0596 | 0.0014271 | 0.010142  |
| hsa_circ_0001554   | 0.874939251 | 11.09992495 | -3.3419 | 0.0014412 | 0.010226  |
| hsa_circ_0001069   | 0           | 13.91786596 | -7.0213 | 0.0014636 | 0.010319  |
| hsa_circ_0008463   | 0           | 15.3280336  | -7.1014 | 0.0014675 | 0.010319  |
| hsa_circ_0018484   | 0           | 13.91495704 | -7.0212 | 0.0014638 | 0.010319  |
| hsa_circ_0069607   | 0           | 13.98132852 | -7.0331 | 0.0014566 | 0.010319  |
| novel_circ_0004561 | 12.07637147 | 0           | 7.0532  | 0.0014665 | 0.010319  |
| novel_circ_0009754 | 0           | 15.50844145 | -7.0948 | 0.0014627 | 0.010319  |
| hsa_circ_0006620   | 0           | 13.9188356  | -7.0198 | 0.0014737 | 0.010334  |
| novel_circ_0013347 | 11.37423654 | 0           | 7.0026  | 0.0014741 | 0.010334  |
| hsa_circ_0040813   | 10.98445609 | 1.134345225 | 3.1703  | 0.001477  | 0.010339  |
| hsa_circ_0004936   | 0           | 14.10471819 | -7.0231 | 0.0014901 | 0.0104    |
| novel_circ_0016590 | 11.80961515 | 0           | 7.0337  | 0.0014881 | 0.0104    |
| novel_circ_0011689 | 4.138315126 | 27.42618336 | -2.659  | 0.001495  | 0.010418  |
| novel_circ_0007111 | 8.833729932 | 0.673438314 | 3.7119  | 0.0015076 | 0.010491  |
| hsa_circ_0000033   | 42.65930804 | 12.48943317 | 1.7516  | 0.0015194 | 0.010547  |
| hsa_circ_0003770   | 0           | 14.0488412  | -7.0212 | 0.0015203 | 0.010547  |
| hsa_circ_0001580   | 2.371884324 | 14.96968538 | -2.6998 | 0.0015352 | 0.010608  |
| hsa_circ_0002570   | 0           | 13.77267568 | -7.0116 | 0.0015359 | 0.010608  |
| novel_circ_0004925 | 0           | 14.64233306 | -7.0439 | 0.0015335 | 0.010608  |
| hsa_circ_0006681   | 1.166585668 | 13.0965     | -3.1937 | 0.0015445 | 0.010652  |
| novel_circ_0001349 | 8.984373567 | 0.671499034 | 3.7377  | 0.0015526 | 0.010692  |
| hsa_circ_0007082   | 0.765738012 | 10.4710575  | -3.7148 | 0.0015597 | 0.010725  |
| novel_circ_0003298 | 0           | 13.87135581 | -6.9988 | 0.0015682 | 0.010767  |
| hsa_circ_0007739   | 0           | 13.91010884 | -7.0048 | 0.0015744 | 0.010794  |
| hsa_circ_0001727   | 280.5884751 | 116.3654239 | 1.2638  | 0.0016062 | 0.010964  |
| hsa_circ_0006420   | 4.410679835 | 29.06115816 | -2.7254 | 0.0016053 | 0.010964  |
| hsa_circ_0067896   | 0           | 13.34778443 | -6.9695 | 0.0016046 | 0.010964  |
| novel_circ_0000475 | 0           | 14.65944348 | -7.0474 | 0.0016193 | 0.011037  |
| hsa_circ_0001240   | 15.80016562 | 1.388538576 | 3.2238  | 0.0016303 | 0.011096  |
| hsa_circ_0008186   | 9.360331127 | 0.673438314 | 3.7899  | 0.0016402 | 0.011147  |
| hsa_circ_0025750   | 19.54166555 | 68.05816676 | -1.7828 | 0.0016443 | 0.011153  |
| novel_circ_0015580 | 0           | 13.13816194 | -6.9543 | 0.0016458 | 0.011153  |
| novel_circ_0004645 | 10.8158338  | 0           | 6.938   | 0.0016506 | 0.011169  |
| hsa_circ_0008861   | 4.470100881 | 19.80115385 | -2.1558 | 0.0016558 | 0.011188  |
| hsa_circ_0003922   | 4.663613263 | 26.44428442 | -2.4257 | 0.0016685 | 0.011241  |
| hsa_circ_0006968   | 94.54901164 | 29.59489448 | 1.6629  | 0.0016672 | 0.011241  |
| hsa_circ_0027668   | 0           | 15.11744147 | -7.0598 | 0.0016762 | 0.011244  |
| hsa_circ_0064555   | 0           | 13.11830061 | -6.9463 | 0.0016756 | 0.011244  |
| novel_circ_0003779 | 0           | 13.44823229 | -6.965  | 0.0016727 | 0.011244  |
| novel_circ_0004485 | 0           | 13.05757542 | -6.9489 | 0.0016802 | 0.011255  |
| hsa_circ_0000857   | 0           | 13.23957944 | -6.9534 | 0.0016865 | 0.011265  |
| hsa_circ_0005982   | 0           | 13.3316301  | -6.9679 | 0.0016841 | 0.011265  |
| hsa_circ_0001747   | 21.06217139 | 80.8024469  | -1.9016 | 0.0016995 | 0.011287  |
| hsa_circ_0067774   | 11.60646191 | 36.56167036 | -1.6387 | 0.0016933 | 0.011287  |
| novel_circ_0001334 | 10.73152266 | 0           | 6.9215  | 0.0016971 | 0.011287  |
| novel_circ_0014264 | 0.765738012 | 10.59718454 | -3.728  | 0.0016952 | 0.011287  |

|                    |             |             |         |           |          |
|--------------------|-------------|-------------|---------|-----------|----------|
| hsa_circ_0079380   | 10.77296506 | 0           | 6.9225  | 0.0017076 | 0.011293 |
| novel_circ_0016912 | 11.43223124 | 0           | 6.972   | 0.001703  | 0.011293 |
| novel_circ_0021980 | 3.221933479 | 16.57075536 | -2.341  | 0.0017063 | 0.011293 |
| hsa_circ_0006127   | 144.8752962 | 56.9975095  | 1.3417  | 0.0017101 | 0.011294 |
| hsa_circ_0035999   | 1.166585668 | 12.48943317 | -3.1415 | 0.0017197 | 0.011334 |
| novel_circ_0002428 | 11.01352822 | 0           | 6.9335  | 0.0017211 | 0.011334 |
| hsa_circ_0002954   | 107.756064  | 14.54027549 | 2.8197  | 0.001732  | 0.011358 |
| novel_circ_0002449 | 11.37696595 | 0           | 6.972   | 0.001731  | 0.011358 |
| novel_circ_0019994 | 0           | 14.35486142 | -7.0124 | 0.0017318 | 0.011358 |
| hsa_circ_0000205   | 2.214329243 | 15.5538104  | -2.7915 | 0.0017366 | 0.011372 |
| hsa_circ_0000494   | 0           | 13.32113561 | -6.9466 | 0.0017482 | 0.011428 |
| hsa_circ_0005966   | 0           | 13.12217917 | -6.9368 | 0.0017501 | 0.011428 |
| hsa_circ_0005420   | 0           | 12.9484008  | -6.9337 | 0.0017538 | 0.011433 |
| novel_circ_0016356 | 10.54489544 | 0.671499034 | 3.9315  | 0.0017558 | 0.011433 |
| novel_circ_0007942 | 10.77439141 | 0           | 6.9209  | 0.0017584 | 0.011434 |
| novel_circ_0018747 | 0           | 12.71891698 | -6.9173 | 0.001778  | 0.011546 |
| hsa_circ_0017995   | 0           | 12.84892258 | -6.9248 | 0.0017865 | 0.011569 |
| novel_circ_0010833 | 0           | 12.67628539 | -6.9081 | 0.0017857 | 0.011569 |
| hsa_circ_0006668   | 42.83887424 | 10.23769513 | 2.0297  | 0.0017986 | 0.011631 |
| novel_circ_0008559 | 10.49799423 | 0.462846192 | 4.0368  | 0.0018339 | 0.011843 |
| hsa_circ_0037127   | 10.77712082 | 0           | 6.9173  | 0.0018521 | 0.011944 |
| hsa_circ_0008164   | 1.166585668 | 13.20373534 | -3.2052 | 0.0018631 | 0.011998 |
| novel_circ_0017753 | 0           | 12.4448623  | -6.8837 | 0.0018662 | 0.012002 |
| hsa_circ_0080849   | 0           | 12.54724944 | -6.8883 | 0.0018692 | 0.012005 |
| hsa_circ_0018273   | 9.339623069 | 0.671499034 | 3.7544  | 0.0018856 | 0.012027 |
| hsa_circ_0060521   | 0           | 12.36330613 | -6.8809 | 0.001884  | 0.012027 |
| novel_circ_0013740 | 0           | 12.44680158 | -6.882  | 0.0018809 | 0.012027 |
| novel_circ_0014081 | 0           | 13.2076139  | -6.9228 | 0.0018766 | 0.012027 |
| novel_circ_0016651 | 0           | 12.61846912 | -6.8985 | 0.0018849 | 0.012027 |
| novel_circ_0013287 | 1.349030846 | 11.47830605 | -2.9712 | 0.0018996 | 0.0121   |
| hsa_circ_0001630   | 1.640677263 | 13.20373534 | -2.8545 | 0.0019209 | 0.012136 |
| hsa_circ_0004024   | 0.874939251 | 10.6380484  | -3.2794 | 0.0019097 | 0.012136 |
| hsa_circ_0007455   | 0           | 12.23523981 | -6.8673 | 0.001918  | 0.012136 |
| hsa_circ_0040188   | 23.58196994 | 5.757160856 | 2.037   | 0.0019205 | 0.012136 |
| hsa_circ_0060950   | 19.98265255 | 5.085661822 | 1.9697  | 0.0019192 | 0.012136 |
| novel_circ_0012705 | 3.062952047 | 29.5800529  | -3.2015 | 0.0019121 | 0.012136 |
| novel_circ_0006921 | 0           | 14.07031225 | -6.9624 | 0.0019261 | 0.012153 |
| hsa_circ_0001649   | 0           | 12.36524541 | -6.875  | 0.0019327 | 0.012178 |
| hsa_circ_0058514   | 5.360289375 | 37.01755751 | -2.7588 | 0.0019366 | 0.012186 |
| hsa_circ_0058346   | 12.04875196 | 1.15711548  | 3.0867  | 0.001941  | 0.012189 |
| novel_circ_0010618 | 10.45094345 | 0           | 6.8799  | 0.0019423 | 0.012189 |
| hsa_circ_0001432   | 48.2351472  | 119.8752264 | -1.3024 | 0.0019628 | 0.012216 |
| hsa_circ_0003032   | 0           | 12.13188303 | -6.857  | 0.0019622 | 0.012216 |
| hsa_circ_0005789   | 0           | 12.12897411 | -6.8569 | 0.0019626 | 0.012216 |
| hsa_circ_0008638   | 10.06664809 | 0           | 6.8479  | 0.0019536 | 0.012216 |
| hsa_circ_0009090   | 0           | 12.28078032 | -6.8706 | 0.0019598 | 0.012216 |
| hsa_circ_0060849   | 0           | 12.28078032 | -6.8706 | 0.0019598 | 0.012216 |
| novel_circ_0001644 | 10.0003156  | 0           | 6.8428  | 0.001965  | 0.012216 |
| hsa_circ_0008199   | 0           | 12.30064166 | -6.8714 | 0.0019821 | 0.012307 |
| novel_circ_0020276 | 10.61268057 | 0           | 6.8667  | 0.0020117 | 0.012474 |
| hsa_circ_0001470   | 0           | 12.97716045 | -6.892  | 0.0020233 | 0.012529 |
| hsa_circ_0004587   | 34.13104742 | 93.02556896 | -1.4336 | 0.0020319 | 0.012566 |
| hsa_circ_0002607   | 0           | 11.92226055 | -6.8367 | 0.0020481 | 0.0126   |
| hsa_circ_0006717   | 3.672561327 | 21.02561045 | -2.4432 | 0.0020407 | 0.0126   |
| novel_circ_0014238 | 40.67590111 | 9.054900471 | 2.1401  | 0.0020434 | 0.0126   |
| novel_circ_0020277 | 69.91619884 | 4.700493235 | 3.75    | 0.0020483 | 0.0126   |
| hsa_circ_0072688   | 0           | 12.12606519 | -6.8456 | 0.0020563 | 0.012633 |
| hsa_circ_0004383   | 1.914345029 | 17.51049123 | -3.1542 | 0.0020623 | 0.012653 |
| hsa_circ_0001613   | 0           | 11.8757504  | -6.824  | 0.0020787 | 0.012654 |
| hsa_circ_0003777   | 11.92299843 | 1.15711548  | 3.067   | 0.0020741 | 0.012654 |
| hsa_circ_0004322   | 8.06799192  | 0.462846192 | 3.6865  | 0.0020756 | 0.012654 |
| hsa_circ_0008042   | 17.62601747 | 2.014497101 | 3.117   | 0.0020733 | 0.012654 |
| hsa_circ_0023555   | 27.09554983 | 7.102098204 | 1.9434  | 0.0020774 | 0.012654 |
| novel_circ_0007916 | 0           | 12.00769528 | -6.8341 | 0.0020785 | 0.012654 |
| hsa_circ_0002473   | 0.583292834 | 9.813773514 | -3.6727 | 0.0020879 | 0.012677 |

|                    |             |             |         |           |          |
|--------------------|-------------|-------------|---------|-----------|----------|
| novel_circ_0013968 | 0           | 12.50170893 | -6.8558 | 0.002086  | 0.012677 |
| hsa_circ_0031657   | 1.640677263 | 12.86781427 | -2.845  | 0.002113  | 0.012796 |
| hsa_circ_0044954   | 33.80617311 | 5.648955873 | 2.5392  | 0.0021109 | 0.012796 |
| hsa_circ_0005585   | 10.87525485 | 36.30439653 | -1.7081 | 0.0021197 | 0.012803 |
| hsa_circ_0006871   | 19.00957926 | 3.994917824 | 2.1641  | 0.0021196 | 0.012803 |
| novel_circ_0010964 | 9.725221483 | 0.694269288 | 3.4413  | 0.0021268 | 0.01283  |
| hsa_circ_0064557   | 1.223277306 | 11.09895531 | -3.2198 | 0.0021477 | 0.012936 |
| novel_circ_0013942 | 75.89731427 | 28.56875423 | 1.4014  | 0.00215   | 0.012936 |
| novel_circ_0020721 | 0           | 11.68695889 | -6.8094 | 0.0021573 | 0.012963 |
| hsa_circ_0054086   | 10.13025118 | 0           | 6.8169  | 0.0021609 | 0.012968 |
| hsa_circ_0007930   | 0.583292834 | 9.312972383 | -3.6233 | 0.0021643 | 0.012972 |
| hsa_circ_0003054   | 0           | 11.75253229 | -6.8045 | 0.0021683 | 0.012979 |
| novel_circ_0001666 | 720.7048615 | 8.099808358 | 5.7379  | 0.0021803 | 0.013034 |
| hsa_circ_0001173   | 0           | 11.67097612 | -6.8014 | 0.0021914 | 0.013084 |
| hsa_circ_0083557   | 10.19240163 | 0.694269288 | 3.5124  | 0.0022011 | 0.013125 |
| novel_circ_0011800 | 9.751537929 | 0           | 6.7974  | 0.0022339 | 0.013304 |
| hsa_circ_0001478   | 0           | 11.53806161 | -6.786  | 0.0022397 | 0.013321 |
| novel_circ_0010267 | 0.874939251 | 11.05923264 | -3.3262 | 0.0022657 | 0.013459 |
| hsa_circ_0064690   | 0           | 11.53709197 | -6.7822 | 0.0022763 | 0.013505 |
| novel_circ_0012546 | 0           | 11.41484349 | -6.7714 | 0.0022823 | 0.013523 |
| novel_circ_0002521 | 9.732132929 | 0           | 6.7801  | 0.0022888 | 0.013545 |
| hsa_circ_0000740   | 12.34730983 | 1.932940934 | 2.5738  | 0.0022988 | 0.013582 |
| hsa_circ_0002041   | 0           | 11.37397963 | -6.7779 | 0.002301  | 0.013582 |
| novel_circ_0022167 | 9.631269486 | 0           | 6.7652  | 0.0023115 | 0.013627 |
| hsa_circ_0076198   | 19.46163346 | 3.277878282 | 2.5386  | 0.0023171 | 0.013642 |
| novel_circ_0022114 | 9.866224264 | 1.010157472 | 3.3046  | 0.0023213 | 0.01365  |
| hsa_circ_0001820   | 0.765738012 | 11.15386266 | -3.7524 | 0.0023313 | 0.013692 |
| hsa_circ_0028899   | 215.7194189 | 89.40549678 | 1.2643  | 0.0023401 | 0.013726 |
| hsa_circ_0081778   | 9.241489034 | 0           | 6.7379  | 0.0023474 | 0.013751 |
| hsa_circ_0006664   | 17.85133139 | 3.025624213 | 2.5906  | 0.0023713 | 0.013874 |
| novel_circ_0017946 | 0           | 11.63947911 | -6.7769 | 0.002383  | 0.013925 |
| hsa_circ_0001977   | 0           | 11.14449582 | -6.7534 | 0.0023917 | 0.013944 |
| hsa_circ_0005476   | 0           | 11.09798567 | -6.7438 | 0.0023921 | 0.013944 |
| novel_circ_0013159 | 0           | 11.28677718 | -6.7498 | 0.0023952 | 0.013944 |
| hsa_circ_0000650   | 71.04164125 | 11.15225294 | 2.6064  | 0.0024122 | 0.013973 |
| hsa_circ_0006610   | 1.80657014  | 12.10814314 | -2.7017 | 0.0024079 | 0.013973 |
| novel_circ_0002475 | 9.184797395 | 0           | 6.7356  | 0.0024059 | 0.013973 |
| novel_circ_0017524 | 9.175156541 | 0           | 6.7275  | 0.0024111 | 0.013973 |
| novel_circ_0001382 | 46.80180521 | 15.8914992  | 1.5384  | 0.0024218 | 0.013996 |
| novel_circ_0017107 | 0           | 11.07812434 | -6.7358 | 0.0024222 | 0.013996 |
| novel_circ_0017723 | 0           | 11.01545986 | -6.7392 | 0.0024323 | 0.014037 |
| hsa_circ_0075842   | 10.38734036 | 0           | 6.8259  | 0.0024357 | 0.01404  |
| hsa_circ_0005115   | 0           | 10.99753781 | -6.7326 | 0.0024522 | 0.014118 |
| hsa_circ_0035197   | 17.90932609 | 61.22497807 | -1.7571 | 0.0024627 | 0.014131 |
| hsa_circ_0035803   | 11.7391269  | 1.342998067 | 3.1382  | 0.0024667 | 0.014131 |
| novel_circ_0009051 | 9.059043856 | 0           | 6.7159  | 0.0024591 | 0.014131 |
| novel_circ_0010466 | 9.143354999 | 0           | 6.7268  | 0.0024661 | 0.014131 |
| hsa_circ_0000042   | 46.81702817 | 12.06727928 | 1.9198  | 0.0024742 | 0.014133 |
| hsa_circ_0009118   | 0.874939251 | 10.09073712 | -3.2122 | 0.0024791 | 0.014133 |
| hsa_circ_0060624   | 33.57955613 | 10.84670124 | 1.6331  | 0.002471  | 0.014133 |
| novel_circ_0015651 | 0           | 11.0401694  | -6.739  | 0.0024784 | 0.014133 |
| hsa_circ_0012553   | 0           | 11.5022175  | -6.7537 | 0.0024848 | 0.014148 |
| hsa_circ_0006163   | 0           | 10.86947149 | -6.7183 | 0.0024886 | 0.014152 |
| novel_circ_0018334 | 9.157177891 | 0           | 6.7114  | 0.0024948 | 0.01417  |
| novel_circ_0005594 | 0           | 10.87044113 | -6.7165 | 0.0025074 | 0.014217 |
| novel_circ_0020239 | 9.132287795 | 0           | 6.7087  | 0.002509  | 0.014217 |
| hsa_circ_0003664   | 0           | 10.78500641 | -6.7147 | 0.0025205 | 0.014264 |
| hsa_circ_0003192   | 0           | 11.09507675 | -6.7299 | 0.0025338 | 0.014288 |
| hsa_circ_0007403   | 14.25616976 | 2.06197689  | 2.6449  | 0.002531  | 0.014288 |
| novel_circ_0018204 | 9.202776045 | 0           | 6.7292  | 0.0025319 | 0.014288 |
| hsa_circ_0003433   | 0           | 10.78403677 | -6.713  | 0.0025373 | 0.01429  |
| novel_circ_0004741 | 0           | 10.86559293 | -6.7131 | 0.0025409 | 0.014293 |
| hsa_circ_0007892   | 28.16402775 | 8.074300736 | 1.7551  | 0.00255   | 0.014327 |
| hsa_circ_0015259   | 1.690457455 | 17.51615107 | -3.2208 | 0.0025604 | 0.014368 |
| novel_circ_0005245 | 8.893150978 | 0           | 6.6958  | 0.0025679 | 0.014393 |

|                    |             |             |         |           |          |
|--------------------|-------------|-------------|---------|-----------|----------|
| novel_circ_0003937 | 0           | 10.84476196 | -6.7049 | 0.0025746 | 0.014408 |
| novel_circ_0013756 | 0           | 10.74237482 | -6.6989 | 0.0025778 | 0.014408 |
| novel_circ_0018366 | 8.991285013 | 0           | 6.6933  | 0.0025828 | 0.014408 |
| novel_circ_0020540 | 0           | 11.37318155 | -6.7348 | 0.0025802 | 0.014408 |
| hsa_circ_0057521   | 3.263375875 | 19.46540433 | -2.5369 | 0.0025935 | 0.01445  |
| hsa_circ_0072440   | 0           | 10.7443141  | -6.6958 | 0.0026133 | 0.014509 |
| hsa_circ_0073068   | 0           | 10.76708435 | -6.7012 | 0.0026118 | 0.014509 |
| novel_circ_0001344 | 8.018211727 | 0.671499034 | 3.5759  | 0.0026107 | 0.014509 |
| hsa_circ_0003863   | 4.3125458   | 23.71371742 | -2.4202 | 0.0026393 | 0.014582 |
| hsa_circ_0007567   | 1.223277306 | 11.14255654 | -3.2253 | 0.0026454 | 0.014582 |
| hsa_circ_0017311   | 1.458232085 | 14.01637454 | -3.0047 | 0.0026371 | 0.014582 |
| hsa_circ_0031814   | 0           | 11.16144823 | -6.7323 | 0.002634  | 0.014582 |
| novel_circ_0002904 | 0           | 10.66178829 | -6.6925 | 0.0026443 | 0.014582 |
| novel_circ_0019752 | 0           | 10.82860763 | -6.7123 | 0.002635  | 0.014582 |
| hsa_circ_0024872   | 13.869145   | 2.141593776 | 2.6597  | 0.0026623 | 0.014632 |
| hsa_circ_0070930   | 0           | 10.53372198 | -6.6797 | 0.0026638 | 0.014632 |
| novel_circ_0002870 | 9.954691165 | 0           | 6.7751  | 0.0026614 | 0.014632 |
| novel_circ_0008152 | 0           | 10.88545426 | -6.7059 | 0.0026675 | 0.014635 |
| hsa_circ_0001147   | 4.188095318 | 20.99170563 | -2.2813 | 0.0026788 | 0.014663 |
| novel_circ_0020836 | 0           | 11.47072048 | -6.732  | 0.0026777 | 0.014663 |
| hsa_circ_0079422   | 0           | 10.55164403 | -6.6826 | 0.0026866 | 0.014671 |
| novel_circ_0012759 | 0           | 10.5773232  | -6.6878 | 0.0026852 | 0.014671 |
| hsa_circ_0006993   | 1.398811038 | 11.37785819 | -2.944  | 0.0027137 | 0.014742 |
| hsa_circ_0007349   | 0           | 10.50998208 | -6.6692 | 0.0027183 | 0.014742 |
| hsa_circ_0020822   | 5.636686549 | 23.24311411 | -2.0081 | 0.0027128 | 0.014742 |
| novel_circ_0009577 | 8.933290317 | 0           | 6.677   | 0.0027185 | 0.014742 |
| novel_circ_0014967 | 9.528953413 | 0           | 6.739   | 0.0027107 | 0.014742 |
| novel_circ_0015850 | 0           | 11.68422153 | -6.7414 | 0.0027118 | 0.014742 |
| hsa_circ_0005868   | 0           | 11.53224376 | -6.7385 | 0.002727  | 0.014748 |
| hsa_circ_0008153   | 3.669831919 | 33.46676574 | -3.142  | 0.0027323 | 0.014748 |
| novel_circ_0004661 | 0           | 10.97961576 | -6.7026 | 0.0027257 | 0.014748 |
| novel_circ_0020480 | 0           | 10.50901244 | -6.6681 | 0.0027307 | 0.014748 |
| hsa_circ_0008934   | 0           | 10.68455855 | -6.6879 | 0.0027445 | 0.01478  |
| novel_circ_0017697 | 0           | 10.55746187 | -6.6778 | 0.0027415 | 0.01478  |
| hsa_circ_0039264   | 0           | 10.32312985 | -6.6599 | 0.0027558 | 0.014823 |
| novel_circ_0016484 | 0           | 11.46215173 | -6.7435 | 0.0027655 | 0.014859 |
| novel_circ_0000527 | 0           | 10.42454735 | -6.6641 | 0.0027709 | 0.01487  |
| hsa_circ_0000117   | 0           | 10.34396083 | -6.663  | 0.0027784 | 0.014894 |
| hsa_circ_0001290   | 14.79529079 | 56.23345869 | -1.9017 | 0.0027831 | 0.014902 |
| hsa_circ_0006146   | 0           | 10.34590011 | -6.6611 | 0.0027999 | 0.014974 |
| hsa_circ_0002179   | 74.66024035 | 29.49444662 | 1.3284  | 0.0028085 | 0.014986 |
| novel_circ_0004660 | 0           | 10.82005242 | -6.68   | 0.0028074 | 0.014986 |
| hsa_circ_0040507   | 8.81990704  | 0           | 6.6715  | 0.0028347 | 0.015092 |
| novel_circ_0005025 | 0           | 10.42357771 | -6.6586 | 0.002833  | 0.015092 |
| hsa_circ_0085441   | 0           | 10.61042994 | -6.6644 | 0.0028474 | 0.015142 |
| novel_circ_0009053 | 8.785376089 | 0           | 6.662   | 0.002853  | 0.015154 |
| hsa_circ_0001675   | 0           | 10.4017771  | -6.6512 | 0.0028598 | 0.015164 |
| hsa_circ_0002301   | 0           | 11.02870527 | -6.6878 | 0.0028646 | 0.015164 |
| hsa_circ_0008058   | 27.03470244 | 68.46982615 | -1.3323 | 0.0028634 | 0.015164 |
| hsa_circ_0004619   | 13.63000818 | 1.683595786 | 3.0258  | 0.0028796 | 0.015226 |
| hsa_circ_0008345   | 0           | 10.27758935 | -6.6376 | 0.0028859 | 0.015241 |
| hsa_circ_0067163   | 16.72057973 | 2.604439968 | 2.6238  | 0.0028912 | 0.015241 |
| novel_circ_0016211 | 0           | 10.53760054 | -6.6599 | 0.0028921 | 0.015241 |
| hsa_circ_0009140   | 6.412065415 | 29.79840215 | -2.1543 | 0.002907  | 0.015289 |
| hsa_circ_0088095   | 0           | 10.08976748 | -6.6294 | 0.0029079 | 0.015289 |
| hsa_circ_0001776   | 135.7319675 | 328.2582052 | -1.2692 | 0.0029129 | 0.015299 |
| hsa_circ_0001380   | 103.0440706 | 254.4633519 | -1.2949 | 0.0029433 | 0.015441 |
| hsa_circ_0005202   | 0           | 10.37997649 | -6.6384 | 0.0029526 | 0.015472 |
| hsa_circ_0003400   | 3.828690059 | 35.29908726 | -3.1287 | 0.0029634 | 0.015478 |
| hsa_circ_0004995   | 0           | 10.17132364 | -6.6252 | 0.0029619 | 0.015478 |
| novel_circ_0006127 | 0           | 9.987380337 | -6.6189 | 0.0029637 | 0.015478 |
| hsa_circ_0070997   | 9.30091008  | 1.010157472 | 3.2283  | 0.0030003 | 0.015652 |
| hsa_circ_0035575   | 0           | 9.962670802 | -6.6091 | 0.0030118 | 0.015694 |
| novel_circ_0013505 | 8.275327194 | 0           | 6.5944  | 0.0030198 | 0.015718 |
| hsa_circ_0002922   | 18.19954615 | 64.38643926 | -1.803  | 0.00303   | 0.015732 |

|                    |             |             |         |           |          |
|--------------------|-------------|-------------|---------|-----------|----------|
| hsa_circ_0003351   | 0           | 10.25772801 | -6.6206 | 0.0030352 | 0.015732 |
| novel_circ_0017110 | 7.45980899  | 0.462846192 | 3.5728  | 0.0030327 | 0.015732 |
| novel_circ_0021693 | 8.532442661 | 0           | 6.6104  | 0.0030358 | 0.015732 |
| novel_circ_0020020 | 20.28263676 | 5.548508014 | 1.8519  | 0.0030447 | 0.01576  |
| hsa_circ_0046843   | 0           | 9.861253303 | -6.5999 | 0.0030533 | 0.01577  |
| novel_circ_0021665 | 0           | 9.861253303 | -6.5999 | 0.0030533 | 0.01577  |
| hsa_circ_0007477   | 10.91396784 | 33.57092061 | -1.6258 | 0.0030743 | 0.015826 |
| hsa_circ_0017924   | 3.372577114 | 17.68329997 | -2.3152 | 0.0030722 | 0.015826 |
| hsa_circ_0023694   | 6.293223322 | 23.38264455 | -1.9053 | 0.0030725 | 0.015826 |
| hsa_circ_0008500   | 0.583292834 | 9.35754325  | -3.6383 | 0.0030801 | 0.015838 |
| hsa_circ_0005954   | 51.88827724 | 144.9942497 | -1.4666 | 0.0031075 | 0.015943 |
| hsa_circ_0006648   | 0           | 10.46444157 | -6.6283 | 0.003107  | 0.015943 |
| hsa_circ_0007334   | 370.7042238 | 156.5192184 | 1.2381  | 0.0031107 | 0.015943 |
| hsa_circ_0087249   | 0           | 11.00787429 | -6.6641 | 0.0031156 | 0.01595  |
| hsa_circ_0035949   | 39.28936332 | 12.29887393 | 1.6789  | 0.0031259 | 0.015969 |
| novel_circ_0002442 | 8.200656905 | 0           | 6.5813  | 0.0031292 | 0.015969 |
| novel_circ_0021690 | 1.166585668 | 12.19631524 | -3.1183 | 0.0031295 | 0.015969 |
| novel_circ_0003027 | 0           | 9.982532135 | -6.6045 | 0.0031333 | 0.015971 |
| hsa_circ_0004179   | 4.95383333  | 20.03160731 | -1.9878 | 0.0031462 | 0.015986 |
| hsa_circ_0007911   | 0           | 9.732217347 | -6.5802 | 0.0031468 | 0.015986 |
| novel_circ_0014464 | 0.874939251 | 10.72428121 | -3.3129 | 0.00315   | 0.015986 |
| novel_circ_0020284 | 8.043101824 | 0           | 6.5696  | 0.003144  | 0.015986 |
| hsa_circ_0004098   | 0           | 9.856405101 | -6.5914 | 0.0031561 | 0.016    |
| hsa_circ_0005199   | 3.246823575 | 15.9929167  | -2.2826 | 0.0031622 | 0.016013 |
| novel_circ_0018427 | 0.815518204 | 8.979162147 | -3.4801 | 0.0031673 | 0.016022 |
| hsa_circ_0076715   | 8.10252287  | 0           | 6.5788  | 0.0031758 | 0.016048 |
| novel_circ_0020289 | 8.349997483 | 0           | 6.5869  | 0.0031794 | 0.016048 |
| hsa_circ_0003273   | 2.446554613 | 19.57651824 | -2.995  | 0.0031912 | 0.016085 |
| hsa_circ_0007449   | 0           | 9.627890926 | -6.5705 | 0.0031936 | 0.016085 |
| novel_circ_0001355 | 20.74563487 | 3.275939001 | 2.6218  | 0.003199  | 0.016095 |
| hsa_circ_0004217   | 0           | 9.629830207 | -6.5691 | 0.003213  | 0.016148 |
| novel_circ_0022121 | 7.951879235 | 0           | 6.5572  | 0.0032253 | 0.016192 |
| hsa_circ_0001851   | 10.24779021 | 1.010157472 | 3.3271  | 0.0032373 | 0.016212 |
| hsa_circ_0002832   | 0           | 9.864162224 | -6.5849 | 0.0032437 | 0.016212 |
| hsa_circ_0003585   | 0           | 9.673431434 | -6.5767 | 0.0032582 | 0.016212 |
| hsa_circ_0006448   | 7.926989138 | 0           | 6.5534  | 0.0032545 | 0.016212 |
| hsa_circ_0006705   | 0           | 9.647752259 | -6.5714 | 0.0032544 | 0.016212 |
| hsa_circ_0079813   | 0           | 9.647752259 | -6.5714 | 0.0032544 | 0.016212 |
| novel_circ_0001310 | 0           | 9.947657671 | -6.5848 | 0.0032604 | 0.016212 |
| novel_circ_0007329 | 7.685122914 | 0.671499034 | 3.5136  | 0.0032569 | 0.016212 |
| novel_circ_0014721 | 0           | 9.922948136 | -6.5794 | 0.0032555 | 0.016212 |
| hsa_circ_0005667   | 0           | 10.1296617  | -6.5914 | 0.003275  | 0.016267 |
| hsa_circ_0006965   | 0           | 9.709447093 | -6.5642 | 0.0032798 | 0.016273 |
| hsa_circ_0003164   | 0           | 9.501763891 | -6.5488 | 0.0033148 | 0.016411 |
| hsa_circ_0035654   | 0           | 9.631769488 | -6.5612 | 0.003318  | 0.016411 |
| novel_circ_0009866 | 13.8442549  | 1.678747584 | 3.0353  | 0.0033112 | 0.016411 |
| hsa_circ_0004813   | 0           | 9.5473044   | -6.5603 | 0.0033222 | 0.016414 |
| novel_circ_0002242 | 0           | 9.567165733 | -6.564  | 0.0033405 | 0.016487 |
| hsa_circ_0006987   | 2.456195467 | 12.8469833  | -2.3507 | 0.0033616 | 0.016565 |
| novel_circ_0020244 | 21.42160293 | 5.400580365 | 2.0041  | 0.0033634 | 0.016565 |
| novel_circ_0014976 | 49.26345949 | 11.46781156 | 2.0964  | 0.0033751 | 0.016605 |
| hsa_circ_0000439   | 0.583292834 | 9.148092322 | -3.5756 | 0.0033867 | 0.016645 |
| hsa_circ_0006324   | 30.43908109 | 81.69472203 | -1.4169 | 0.0033941 | 0.016663 |
| hsa_circ_0001268   | 7.944967789 | 0           | 6.5493  | 0.0034128 | 0.016703 |
| hsa_circ_0004245   | 9.526224005 | 34.09529008 | -1.8088 | 0.0034097 | 0.016703 |
| hsa_circ_0005643   | 0           | 9.632739128 | -6.5544 | 0.0034106 | 0.016703 |
| hsa_circ_0001146   | 6.821250867 | 36.95409495 | -2.3625 | 0.0034307 | 0.016773 |
| novel_circ_0010913 | 8.143965267 | 0           | 6.5608  | 0.003439  | 0.016796 |
| novel_circ_0014660 | 76.75033942 | 21.32421666 | 1.8366  | 0.0034487 | 0.016826 |
| hsa_circ_0006677   | 0           | 9.68958576  | -6.5464 | 0.0034558 | 0.016843 |
| novel_circ_0016647 | 0.874939251 | 9.651630821 | -3.1545 | 0.0034602 | 0.016846 |
| novel_circ_0018693 | 0           | 9.583320058 | -6.5388 | 0.0034647 | 0.016851 |
| hsa_circ_0005565   | 0           | 9.461869671 | -6.547  | 0.0034776 | 0.016861 |
| novel_circ_0000694 | 1.398811038 | 10.21880343 | -2.7931 | 0.0034703 | 0.016861 |
| novel_circ_0018100 | 0           | 9.462839312 | -6.5471 | 0.0034774 | 0.016861 |

|                    |             |             |         |           |          |
|--------------------|-------------|-------------|---------|-----------|----------|
| hsa_circ_0000776   | 0           | 10.37512828 | -6.5978 | 0.0034897 | 0.01687  |
| hsa_circ_0003622   | 0           | 9.336712277 | -6.5335 | 0.0035083 | 0.01687  |
| hsa_circ_0003730   | 0           | 9.422147005 | -6.5353 | 0.0034971 | 0.01687  |
| hsa_circ_0023918   | 6.226890829 | 24.94075338 | -1.9896 | 0.0035069 | 0.01687  |
| hsa_circ_0025570   | 0           | 9.336712277 | -6.5335 | 0.0035083 | 0.01687  |
| hsa_circ_0046420   | 7.660232818 | 0           | 6.5095  | 0.0034863 | 0.01687  |
| novel_circ_0015940 | 0.765738012 | 8.99902348  | -3.5    | 0.0035012 | 0.01687  |
| novel_circ_0022148 | 7.826125696 | 0           | 6.519   | 0.0035064 | 0.01687  |
| hsa_circ_0004095   | 8.521349176 | 0           | 6.5945  | 0.0035133 | 0.016876 |
| hsa_circ_0003937   | 8.701064946 | 0.694269288 | 3.2843  | 0.003517  | 0.016877 |
| hsa_circ_0002505   | 17.45321314 | 4.518489209 | 1.9549  | 0.0035392 | 0.016914 |
| hsa_circ_0016102   | 8.949842617 | 1.010157472 | 3.1647  | 0.0035392 | 0.016914 |
| hsa_circ_0069285   | 0           | 9.289232488 | -6.5198 | 0.003538  | 0.016914 |
| novel_circ_0014593 | 1.166585668 | 11.81211629 | -3.0665 | 0.0035372 | 0.016914 |
| novel_circ_0016257 | 0.765738012 | 9.169892936 | -3.5036 | 0.0035622 | 0.017006 |
| hsa_circ_0004669   | 0           | 9.809894952 | -6.5505 | 0.0035698 | 0.017025 |
| hsa_circ_0003073   | 0.583292834 | 8.282953578 | -3.4573 | 0.0035773 | 0.017043 |
| hsa_circ_0001313   | 1.223277306 | 11.95342801 | -3.281  | 0.003583  | 0.017053 |
| hsa_circ_0006171   | 15.72679839 | 2.708766389 | 2.5003  | 0.0035906 | 0.017072 |
| hsa_circ_0004303   | 0           | 9.061687954 | -6.4943 | 0.003631  | 0.017229 |
| hsa_circ_0067582   | 0           | 9.288262848 | -6.5132 | 0.0036307 | 0.017229 |
| hsa_circ_0025039   | 7.593900325 | 0           | 6.4931  | 0.0036483 | 0.017293 |
| hsa_circ_0001368   | 0           | 9.475115075 | -6.5182 | 0.0036708 | 0.017332 |
| hsa_circ_0079481   | 35.04324703 | 10.29842032 | 1.7608  | 0.0036713 | 0.017332 |
| hsa_circ_0081028   | 0           | 9.062657594 | -6.4918 | 0.0036673 | 0.017332 |
| hsa_circ_0088281   | 0           | 9.370788655 | -6.5116 | 0.0036672 | 0.017332 |
| novel_circ_0018326 | 0           | 9.799730023 | -6.5393 | 0.0036751 | 0.017332 |
| hsa_circ_0000842   | 0           | 8.955422252 | -6.4831 | 0.0036981 | 0.017406 |
| hsa_circ_0037353   | 8.391439879 | 0.694269288 | 3.2176  | 0.0036945 | 0.017406 |
| hsa_circ_0007282   | 7.625701867 | 0           | 6.4827  | 0.0037023 | 0.017408 |
| novel_circ_0009187 | 0           | 8.977222866 | -6.4887 | 0.003708  | 0.017417 |
| hsa_circ_0008177   | 16.91136271 | 48.96840616 | -1.5179 | 0.0037413 | 0.017521 |
| hsa_circ_0018274   | 7.990592223 | 0           | 6.5082  | 0.0037391 | 0.017521 |
| novel_circ_0013054 | 10.8323861  | 48.278345   | -2.1234 | 0.0037396 | 0.017521 |
| hsa_circ_0000219   | 22.73752917 | 71.29375656 | -1.635  | 0.0037753 | 0.017574 |
| hsa_circ_0002782   | 11.2899254  | 37.82761735 | -1.7359 | 0.0037613 | 0.017574 |
| hsa_circ_0042802   | 0           | 8.934591279 | -6.4712 | 0.0037742 | 0.017574 |
| novel_circ_0007263 | 12.95549276 | 2.353155539 | 2.5102  | 0.0037621 | 0.017574 |
| novel_circ_0009700 | 0           | 9.380485059 | -6.5054 | 0.0037701 | 0.017574 |
| novel_circ_0011698 | 7.47778764  | 0           | 6.477   | 0.0037654 | 0.017574 |
| hsa_circ_0015779   | 0           | 8.852065471 | -6.4697 | 0.0038002 | 0.017637 |
| hsa_circ_0040357   | 13.28858157 | 1.678747584 | 2.9862  | 0.0037983 | 0.017637 |
| hsa_circ_0054322   | 0           | 8.932651998 | -6.4696 | 0.0037972 | 0.017637 |
| hsa_circ_0004894   | 0           | 9.379343864 | -6.5191 | 0.0038234 | 0.01771  |
| hsa_circ_0005649   | 0           | 9.331864075 | -6.51   | 0.0038218 | 0.01771  |
| novel_circ_0005440 | 0           | 9.892420759 | -6.5352 | 0.0038348 | 0.017745 |
| hsa_circ_0029767   | 0           | 8.936530559 | -6.467  | 0.0038419 | 0.017749 |
| novel_circ_0015406 | 12.43580301 | 44.84815939 | -1.8566 | 0.0038444 | 0.017749 |
| novel_circ_0021895 | 0           | 8.853035112 | -6.4665 | 0.0038472 | 0.017749 |
| hsa_circ_0007609   | 50.40400158 | 15.79202098 | 1.6478  | 0.0038514 | 0.017752 |
| hsa_circ_0084575   | 7.501251386 | 0           | 6.4645  | 0.0038555 | 0.017753 |
| novel_circ_0021401 | 34.98655539 | 9.64969154  | 1.8369  | 0.0038596 | 0.017754 |
| hsa_circ_0066187   | 0           | 8.959300814 | -6.4716 | 0.0038708 | 0.017771 |
| novel_circ_0014947 | 7.410028797 | 0           | 6.4571  | 0.0038674 | 0.017771 |
| hsa_circ_0001333   | 0           | 9.128059435 | -6.4936 | 0.0038789 | 0.01779  |
| hsa_circ_0005567   | 6.124574756 | 70.37367788 | -3.3455 | 0.0039162 | 0.017904 |
| hsa_circ_0007366   | 7.51231859  | 0           | 6.4765  | 0.0039132 | 0.017904 |
| novel_circ_0019364 | 0           | 9.390649988 | -6.5004 | 0.003916  | 0.017904 |
| novel_circ_0020463 | 7.361674955 | 0           | 6.4581  | 0.0039229 | 0.017904 |
| novel_circ_0021430 | 45.15967531 | 14.7600629  | 1.5972  | 0.0039225 | 0.017904 |
| hsa_circ_0009173   | 29.5103029  | 9.14324412  | 1.699   | 0.0039302 | 0.017919 |
| novel_circ_0003930 | 0           | 8.725938437 | -6.4475 | 0.0039339 | 0.017919 |
| hsa_circ_0077084   | 0           | 8.911821024 | -6.4531 | 0.0039546 | 0.017996 |
| hsa_circ_0001680   | 0           | 8.960270454 | -6.463  | 0.0040025 | 0.018071 |
| hsa_circ_0002474   | 0           | 9.146951128 | -6.4884 | 0.0040153 | 0.018071 |

|                    |             |             |         |           |          |
|--------------------|-------------|-------------|---------|-----------|----------|
| hsa_circ_0004815   | 0           | 8.702198542 | -6.4354 | 0.0040121 | 0.018071 |
| hsa_circ_0018881   | 3.556448642 | 19.21605919 | -2.3276 | 0.0040035 | 0.018071 |
| hsa_circ_0047720   | 0           | 8.743860489 | -6.4489 | 0.0040077 | 0.018071 |
| hsa_circ_0056838   | 0           | 9.123382787 | -6.4661 | 0.0039851 | 0.018071 |
| hsa_circ_0071175   | 0           | 8.641473349 | -6.4418 | 0.0040183 | 0.018071 |
| novel_circ_0001653 | 7.227583619 | 0           | 6.4366  | 0.0039801 | 0.018071 |
| novel_circ_0008620 | 0           | 8.766630743 | -6.4539 | 0.0040215 | 0.018071 |
| novel_circ_0013568 | 0.815518204 | 9.380485059 | -3.5031 | 0.0039915 | 0.018071 |
| novel_circ_0014604 | 0.583292834 | 8.304754192 | -3.4689 | 0.0039875 | 0.018071 |
| novel_circ_0019977 | 0           | 9.138395918 | -6.4701 | 0.0040103 | 0.018071 |
| novel_circ_0020551 | 0           | 8.620642376 | -6.436  | 0.0040078 | 0.018071 |
| hsa_circ_0084547   | 0           | 8.704137823 | -6.4342 | 0.0040347 | 0.018079 |
| novel_circ_0011356 | 0           | 8.704137823 | -6.4342 | 0.0040347 | 0.018079 |
| novel_circ_0013366 | 0.583292834 | 8.052500122 | -3.416  | 0.004034  | 0.018079 |
| novel_circ_0015547 | 0           | 8.640503709 | -6.4404 | 0.0040389 | 0.01808  |
| hsa_circ_0067474   | 0           | 8.621612016 | -6.4329 | 0.0040566 | 0.018142 |
| hsa_circ_0004650   | 0           | 9.223830647 | -6.4679 | 0.0040764 | 0.018179 |
| hsa_circ_0024235   | 0           | 8.598841762 | -6.4247 | 0.004075  | 0.018179 |
| hsa_circ_0029853   | 0.583292834 | 8.158765824 | -3.4296 | 0.0040767 | 0.018179 |
| hsa_circ_0003812   | 90.9037525  | 26.74659764 | 1.7528  | 0.0040837 | 0.018194 |
| hsa_circ_0021570   | 0.583292834 | 8.784724349 | -3.5119 | 0.0040898 | 0.018203 |
| novel_circ_0009318 | 0           | 8.639534068 | -6.4361 | 0.0041023 | 0.018241 |
| hsa_circ_0003263   | 0           | 8.973344304 | -6.461  | 0.004107  | 0.018245 |
| novel_circ_0012449 | 0           | 8.790370638 | -6.4515 | 0.0041354 | 0.018354 |
| hsa_circ_0001316   | 1.989015318 | 11.64626659 | -2.5885 | 0.0041506 | 0.018404 |
| hsa_circ_0002876   | 11.15307838 | 1.010157472 | 3.4396  | 0.0041634 | 0.01841  |
| hsa_circ_0005308   | 7.052049888 | 0           | 6.402   | 0.0041705 | 0.01841  |
| hsa_circ_0006588   | 1.166585668 | 10.99171997 | -2.9593 | 0.0041718 | 0.01841  |
| hsa_circ_0016646   | 7.270452366 | 0           | 6.4348  | 0.0041715 | 0.01841  |
| hsa_circ_0025005   | 7.052049888 | 0           | 6.402   | 0.0041705 | 0.01841  |
| novel_circ_0002214 | 0           | 8.95057405  | -6.4499 | 0.0041975 | 0.018506 |
| novel_circ_0009060 | 7.111470934 | 0           | 6.4132  | 0.0042143 | 0.018563 |
| hsa_circ_0006348   | 0           | 8.387279999 | -6.4009 | 0.0042373 | 0.018632 |
| hsa_circ_0054144   | 6.985717395 | 27.11012362 | -1.9355 | 0.0042419 | 0.018632 |
| novel_circ_0015910 | 0           | 8.680397928 | -6.4152 | 0.0042402 | 0.018632 |
| hsa_circ_0006355   | 0           | 8.575101867 | -6.4068 | 0.0042575 | 0.018665 |
| hsa_circ_0023233   | 0           | 8.575101867 | -6.4068 | 0.0042575 | 0.018665 |
| hsa_circ_0007272   | 7.027159791 | 0           | 6.3946  | 0.0042653 | 0.018682 |
| hsa_circ_0084443   | 0           | 8.471745087 | -6.3984 | 0.0042777 | 0.018718 |
| novel_circ_0013763 | 0           | 8.574132227 | -6.4048 | 0.0042912 | 0.01876  |
| hsa_circ_0000702   | 0           | 8.472714727 | -6.3971 | 0.0043016 | 0.018769 |
| novel_circ_0012915 | 7.360248605 | 0           | 6.4261  | 0.0043031 | 0.018769 |
| novel_circ_0021006 | 7.094918634 | 0           | 6.4057  | 0.0043054 | 0.018769 |
| hsa_circ_0055019   | 0           | 8.511467753 | -6.4076 | 0.004346  | 0.018929 |
| hsa_circ_0013093   | 0           | 8.364509745 | -6.3853 | 0.0043779 | 0.019039 |
| hsa_circ_0036768   | 19.13260339 | 5.548508014 | 1.7653  | 0.0043796 | 0.019039 |
| hsa_circ_0001192   | 0           | 9.262583672 | -6.4585 | 0.0043966 | 0.019061 |
| hsa_circ_0005399   | 10.28923261 | 31.03011476 | -1.5991 | 0.0043976 | 0.019061 |
| hsa_circ_0054877   | 0           | 8.261152964 | -6.3774 | 0.004392  | 0.019061 |
| novel_circ_0022124 | 7.633916371 | 0           | 6.4413  | 0.004401  | 0.019061 |
| hsa_circ_0070039   | 11.37281019 | 37.58957833 | -1.7131 | 0.0044104 | 0.019084 |
| hsa_circ_0015262   | 28.6782324  | 83.96275336 | -1.5293 | 0.0044342 | 0.01917  |
| hsa_circ_0006012   | 7.017518937 | 0           | 6.3722  | 0.0044568 | 0.019178 |
| hsa_circ_0055904   | 0           | 8.685246131 | -6.404  | 0.0044505 | 0.019178 |
| novel_circ_0007896 | 0           | 8.281014297 | -6.381  | 0.0044521 | 0.019178 |
| novel_circ_0017219 | 0.815518204 | 8.803616042 | -3.4212 | 0.0044555 | 0.019178 |
| novel_circ_0021920 | 0           | 8.178627157 | -6.3741 | 0.0044549 | 0.019178 |
| hsa_circ_0002101   | 0           | 8.488697498 | -6.3939 | 0.0044703 | 0.019219 |
| hsa_circ_0001423   | 156.6614476 | 66.41544838 | 1.2357  | 0.0044759 | 0.019226 |
| hsa_circ_0000609   | 0           | 8.264061885 | -6.3723 | 0.0044853 | 0.019248 |
| novel_circ_0014385 | 0           | 8.155856903 | -6.3646 | 0.0044908 | 0.019254 |
| hsa_circ_0002692   | 112.5867762 | 17.23288755 | 2.6328  | 0.0045109 | 0.019323 |
| hsa_circ_0034414   | 0           | 8.392128201 | -6.3846 | 0.0045155 | 0.019324 |
| hsa_circ_0007967   | 4.494990978 | 18.22673269 | -2.0304 | 0.0045238 | 0.019335 |
| hsa_circ_0071106   | 0           | 8.326554805 | -6.3886 | 0.0045303 | 0.019335 |

|                    |             |             |         |           |          |
|--------------------|-------------|-------------|---------|-----------|----------|
| hsa_circ_0087385   | 2.75475333  | 14.14734978 | -2.3922 | 0.0045274 | 0.019335 |
| hsa_circ_0003694   | 10.28232116 | 31.97099182 | -1.6184 | 0.0045364 | 0.019343 |
| hsa_circ_0003275   | 3.855006505 | 16.47773506 | -2.0483 | 0.0045717 | 0.019406 |
| hsa_circ_0004671   | 2.041524919 | 18.24676557 | -2.933  | 0.004572  | 0.019406 |
| hsa_circ_0007402   | 0           | 8.449944473 | -6.3756 | 0.0045663 | 0.019406 |
| novel_circ_0001348 | 6.942848648 | 0           | 6.361   | 0.0045635 | 0.019406 |
| novel_circ_0003178 | 0           | 8.345618052 | -6.3678 | 0.0045684 | 0.019406 |
| novel_circ_0014753 | 0           | 8.240321991 | -6.3596 | 0.0045773 | 0.019411 |
| novel_circ_0017295 | 0           | 8.448005192 | -6.3744 | 0.0045883 | 0.01944  |
| novel_circ_0015854 | 0           | 8.328494086 | -6.3846 | 0.0045965 | 0.019457 |
| hsa_circ_0012265   | 7.358945547 | 0.462846192 | 3.5408  | 0.0046073 | 0.019458 |
| hsa_circ_0021604   | 0.765738012 | 8.896636339 | -3.4742 | 0.0046175 | 0.019458 |
| hsa_circ_0047870   | 0           | 8.074300736 | -6.3578 | 0.0046119 | 0.019458 |
| hsa_circ_0073371   | 0           | 8.342709131 | -6.3657 | 0.0046046 | 0.019458 |
| hsa_circ_0083045   | 0           | 8.413928815 | -6.3849 | 0.0046136 | 0.019458 |
| novel_circ_0001678 | 6.835073759 | 0           | 6.3483  | 0.004628  | 0.019467 |
| novel_circ_0013209 | 6.835073759 | 0           | 6.3483  | 0.004628  | 0.019467 |
| hsa_circ_0083619   | 2.572308152 | 13.69014987 | -2.4127 | 0.0046389 | 0.019495 |
| novel_circ_0009320 | 0.815518204 | 8.304754192 | -3.3715 | 0.0046445 | 0.019501 |
| hsa_circ_0056589   | 0           | 8.242261272 | -6.3557 | 0.0046546 | 0.019512 |
| novel_circ_0015732 | 6.669180882 | 0           | 6.3344  | 0.0046554 | 0.019512 |
| hsa_circ_0002021   | 23.19910093 | 62.6614785  | -1.4109 | 0.0046789 | 0.019575 |
| novel_circ_0001088 | 0           | 8.029729868 | -6.3392 | 0.0046774 | 0.019575 |
| hsa_circ_0023900   | 39.82560537 | 7.80201378  | 2.2674  | 0.0046859 | 0.019587 |
| hsa_circ_0000478   | 9.143354999 | 34.40665962 | -1.8787 | 0.0047034 | 0.0196   |
| hsa_circ_0002860   | 0           | 8.028760228 | -6.3374 | 0.0047099 | 0.0196   |
| hsa_circ_0003362   | 6.728601928 | 0           | 6.3466  | 0.004698  | 0.0196   |
| novel_circ_0012987 | 6.917958552 | 0           | 6.3519  | 0.0046994 | 0.0196   |
| novel_circ_0016434 | 0           | 8.028760228 | -6.3374 | 0.0047099 | 0.0196   |
| novel_circ_0009602 | 9.168245095 | 1.00724855  | 3.1936  | 0.0047207 | 0.019627 |
| hsa_circ_0004802   | 0.765738012 | 8.053469763 | -3.3406 | 0.0047372 | 0.019678 |
| hsa_circ_0039349   | 0           | 8.137934851 | -6.3434 | 0.004745  | 0.019693 |
| hsa_circ_0001922   | 8.243525652 | 26.77712502 | -1.6607 | 0.0047643 | 0.019699 |
| hsa_circ_0002092   | 0           | 7.969004675 | -6.3407 | 0.0047825 | 0.019699 |
| hsa_circ_0006200   | 10.75223072 | 1.470094742 | 2.8137  | 0.0047608 | 0.019699 |
| hsa_circ_0012964   | 0           | 8.28780178  | -6.3623 | 0.0047801 | 0.019699 |
| hsa_circ_0079440   | 0           | 8.027790587 | -6.3338 | 0.004777  | 0.019699 |
| hsa_circ_0088058   | 1.166585668 | 10.8087463  | -2.9457 | 0.0047767 | 0.019699 |
| novel_circ_0003415 | 0           | 8.152947982 | -6.3479 | 0.0047845 | 0.019699 |
| novel_circ_0004279 | 0           | 7.924433807 | -6.3267 | 0.0047728 | 0.019699 |
| novel_circ_0005890 | 6.577958293 | 0           | 6.3203  | 0.0047824 | 0.019699 |
| novel_circ_0014475 | 40.00556773 | 9.114656024 | 2.119   | 0.0047943 | 0.019722 |
| novel_circ_0012700 | 0           | 7.927342728 | -6.324  | 0.0048271 | 0.01984  |
| hsa_circ_0089254   | 2.572308152 | 12.42306168 | -2.2541 | 0.0048618 | 0.019915 |
| novel_circ_0008764 | 0           | 7.821077026 | -6.3147 | 0.0048625 | 0.019915 |
| novel_circ_0010072 | 0           | 8.182505719 | -6.3506 | 0.0048578 | 0.019915 |
| novel_circ_0017271 | 7.403117351 | 0.671499034 | 3.4584  | 0.0048547 | 0.019915 |
| hsa_circ_0003548   | 0           | 7.94429514  | -6.3254 | 0.00493   | 0.020033 |
| hsa_circ_0003880   | 13.26511782 | 3.047424827 | 2.1309  | 0.0049187 | 0.020033 |
| hsa_circ_0006796   | 0           | 7.950112982 | -6.3259 | 0.0049273 | 0.020033 |
| hsa_circ_0008887   | 0           | 8.44412663  | -6.3571 | 0.0049207 | 0.020033 |
| hsa_circ_0013298   | 0           | 8.007929254 | -6.319  | 0.0049182 | 0.020033 |
| novel_circ_0007969 | 0           | 7.94429514  | -6.3254 | 0.00493   | 0.020033 |
| novel_circ_0017998 | 0           | 7.950112982 | -6.3259 | 0.0049273 | 0.020033 |
| novel_circ_0020287 | 6.619400689 | 0           | 6.3172  | 0.0049032 | 0.020033 |
| novel_circ_0021533 | 6.627738485 | 0           | 6.3161  | 0.0049232 | 0.020033 |
| hsa_circ_0006609   | 5.360166082 | 59.74419823 | -3.3472 | 0.0049792 | 0.020216 |
| hsa_circ_0002157   | 0           | 7.715780965 | -6.3008 | 0.0049847 | 0.020218 |
| novel_circ_0009616 | 6.461845608 | 0           | 6.3002  | 0.0049885 | 0.020218 |
| hsa_circ_0084756   | 0           | 7.799276413 | -6.2995 | 0.0049973 | 0.020236 |
| hsa_circ_0001364   | 51.74730074 | 20.8132506  | 1.3137  | 0.0050214 | 0.020294 |
| hsa_circ_0052943   | 0.583292834 | 7.902633193 | -3.3721 | 0.0050247 | 0.020294 |
| novel_circ_0017758 | 0           | 8.130177727 | -6.3285 | 0.0050246 | 0.020294 |
| novel_circ_0002623 | 0           | 8.882263287 | -6.3851 | 0.0050779 | 0.020492 |
| novel_circ_0007824 | 6.436955511 | 0           | 6.2919  | 0.0051072 | 0.020592 |

|                    |             |             |         |           |          |
|--------------------|-------------|-------------|---------|-----------|----------|
| hsa_circ_0084622   | 44.50592051 | 11.69923466 | 1.9199  | 0.0051213 | 0.020613 |
| novel_circ_0002885 | 0           | 8.109346754 | -6.317  | 0.0051207 | 0.020613 |
| novel_circ_0013592 | 0           | 7.943325499 | -6.3143 | 0.0051316 | 0.020637 |
| hsa_circ_0068174   | 0           | 7.817198465 | -6.2998 | 0.0051374 | 0.020642 |
| hsa_circ_0005406   | 0           | 7.988866008 | -6.3255 | 0.0051465 | 0.020644 |
| novel_circ_0009182 | 0           | 7.695919632 | -6.2846 | 0.0051448 | 0.020644 |
| hsa_circ_0007225   | 0           | 7.73952086  | -6.2981 | 0.0051681 | 0.020677 |
| hsa_circ_0080069   | 9.968514057 | 1.470094742 | 2.7101  | 0.0051625 | 0.020677 |
| novel_circ_0016592 | 6.685733182 | 0           | 6.3087  | 0.0051668 | 0.020677 |
| hsa_circ_0035336   | 0           | 7.589653931 | -6.2755 | 0.0051735 | 0.020681 |
| hsa_circ_0013608   | 0           | 8.222399939 | -6.323  | 0.0051782 | 0.020682 |
| novel_circ_0016286 | 8.808839835 | 0.925692384 | 2.9292  | 0.0051828 | 0.020682 |
| novel_circ_0010893 | 56.03077441 | 7.177836528 | 2.8922  | 0.0051921 | 0.020702 |
| hsa_circ_0069396   | 0           | 7.609515264 | -6.2817 | 0.0052025 | 0.020726 |
| hsa_circ_0005900   | 0           | 8.004050693 | -6.3045 | 0.0052138 | 0.020753 |
| novel_circ_0020297 | 6.86817836  | 0           | 6.3206  | 0.0052302 | 0.0208   |
| novel_circ_0021441 | 0           | 8.118073518 | -6.3118 | 0.0052446 | 0.02084  |
| novel_circ_0020035 | 0           | 7.69107143  | -6.279  | 0.0052502 | 0.020844 |
| novel_circ_0003687 | 0           | 8.651809832 | -6.3554 | 0.005267  | 0.020894 |
| hsa_circ_0001538   | 1.640677263 | 10.30132924 | -2.5141 | 0.0053055 | 0.020941 |
| hsa_circ_0004343   | 6.521266654 | 0           | 6.2971  | 0.0052926 | 0.020941 |
| hsa_circ_0008004   | 0           | 7.591593211 | -6.2688 | 0.0053079 | 0.020941 |
| hsa_circ_0010926   | 6.521266654 | 0           | 6.2971  | 0.0052926 | 0.020941 |
| hsa_circ_0061510   | 0           | 7.777475799 | -6.2766 | 0.0053085 | 0.020941 |
| hsa_circ_0073608   | 7.634039664 | 38.89770193 | -2.3145 | 0.0052904 | 0.020941 |
| novel_circ_0020645 | 0           | 7.586745009 | -6.2684 | 0.0053104 | 0.020941 |
| novel_circ_0021865 | 0           | 7.483388229 | -6.2605 | 0.0053193 | 0.020959 |
| novel_circ_0000701 | 0           | 7.775536518 | -6.2751 | 0.0053381 | 0.021015 |
| novel_circ_0019109 | 1.631036409 | 11.43470483 | -2.8438 | 0.0053434 | 0.021018 |
| hsa_circ_0000845   | 0           | 7.898754632 | -6.2889 | 0.0053721 | 0.021031 |
| hsa_circ_0001058   | 0           | 8.534409561 | -6.3374 | 0.0053829 | 0.021031 |
| hsa_circ_0002685   | 6.327754272 | 0           | 6.2579  | 0.0053947 | 0.021031 |
| hsa_circ_0005519   | 6.90413566  | 25.39714165 | -1.8181 | 0.0053942 | 0.021031 |
| hsa_circ_0005658   | 0           | 7.48629715  | -6.2568 | 0.0053954 | 0.021031 |
| hsa_circ_0008059   | 0           | 7.567853317 | -6.2579 | 0.0053594 | 0.021031 |
| hsa_circ_0010458   | 0           | 7.99371421  | -6.3118 | 0.0053995 | 0.021031 |
| hsa_circ_0047552   | 0           | 7.48629715  | -6.2568 | 0.0053954 | 0.021031 |
| hsa_circ_0078200   | 0.874939251 | 8.827355936 | -3.0198 | 0.0054008 | 0.021031 |
| novel_circ_0008689 | 0           | 7.568822957 | -6.2564 | 0.0053941 | 0.021031 |
| novel_circ_0014401 | 0           | 7.568822957 | -6.2564 | 0.0053941 | 0.021031 |
| novel_circ_0016290 | 0           | 7.670240457 | -6.2649 | 0.0053802 | 0.021031 |
| hsa_circ_0000038   | 0           | 7.462557255 | -6.247  | 0.0054224 | 0.021063 |
| hsa_circ_0000409   | 0           | 7.462557255 | -6.247  | 0.0054224 | 0.021063 |
| hsa_circ_0080826   | 0           | 7.462557255 | -6.247  | 0.0054224 | 0.021063 |
| hsa_circ_0062649   | 0           | 8.107407473 | -6.3023 | 0.0054273 | 0.021064 |
| hsa_circ_0002154   | 0           | 7.463526896 | -6.2461 | 0.0054417 | 0.021102 |
| hsa_circ_0001632   | 0           | 7.569792598 | -6.2531 | 0.0054668 | 0.021176 |
| novel_circ_0000370 | 0           | 7.564944396 | -6.2527 | 0.0054696 | 0.021176 |
| hsa_circ_0005668   | 0           | 7.400862422 | -6.249  | 0.0055473 | 0.021458 |
| hsa_circ_0002605   | 0           | 7.356291554 | -6.2321 | 0.0055688 | 0.021497 |
| hsa_circ_0005221   | 9.177885949 | 1.00724855  | 3.1939  | 0.0055894 | 0.021497 |
| hsa_circ_0073239   | 0           | 7.356291554 | -6.2321 | 0.0055688 | 0.021497 |
| novel_circ_0001098 | 1.148607018 | 10.76999327 | -3.1696 | 0.0055793 | 0.021497 |
| novel_circ_0009484 | 6.145309094 | 0           | 6.2338  | 0.0055821 | 0.021497 |
| novel_circ_0011616 | 0           | 7.676058299 | -6.2561 | 0.0055853 | 0.021497 |
| novel_circ_0021214 | 6.145309094 | 0           | 6.2338  | 0.0055821 | 0.021497 |
| hsa_circ_0001355   | 0           | 7.274735387 | -6.2297 | 0.0056328 | 0.021512 |
| hsa_circ_0004317   | 0           | 7.503249562 | -6.2511 | 0.0056486 | 0.021512 |
| hsa_circ_0005540   | 0           | 7.274735387 | -6.2297 | 0.0056328 | 0.021512 |
| hsa_circ_0024766   | 15.22508729 | 2.731536643 | 2.3737  | 0.0056408 | 0.021512 |
| hsa_circ_0032939   | 0           | 7.377122527 | -6.2367 | 0.0056417 | 0.021512 |
| hsa_circ_0035216   | 0           | 7.252934773 | -6.2211 | 0.0056391 | 0.021512 |
| hsa_circ_0073486   | 0           | 7.274735387 | -6.2297 | 0.0056328 | 0.021512 |
| hsa_circ_0083004   | 0           | 7.509067404 | -6.2516 | 0.005645  | 0.021512 |
| novel_circ_0002427 | 6.692644628 | 0           | 6.2779  | 0.0056355 | 0.021512 |

|                    |             |             |         |           |          |
|--------------------|-------------|-------------|---------|-----------|----------|
| novel_circ_0008484 | 6.177110637 | 0           | 6.2215  | 0.0056436 | 0.021512 |
| novel_circ_0009626 | 6.177110637 | 0           | 6.2215  | 0.0056436 | 0.021512 |
| novel_circ_0015952 | 0           | 7.381970729 | -6.2371 | 0.0056388 | 0.021512 |
| novel_circ_0010900 | 6.304290526 | 0           | 6.2513  | 0.0056715 | 0.021581 |
| novel_circ_0006318 | 6.085888048 | 0           | 6.2119  | 0.0056832 | 0.021591 |
| novel_circ_0011372 | 6.085888048 | 0           | 6.2119  | 0.0056832 | 0.021591 |
| novel_circ_0002418 | 8.240796244 | 0.694269288 | 3.1878  | 0.0056945 | 0.021599 |
| novel_circ_0008169 | 6.251780926 | 0           | 6.2254  | 0.0056917 | 0.021599 |
| hsa_circ_0002175   | 19.65920459 | 5.990523232 | 1.7183  | 0.0057069 | 0.021628 |
| novel_circ_0014734 | 0.765738012 | 7.694949992 | -3.2689 | 0.0057389 | 0.021732 |
| novel_circ_0006249 | 0           | 7.545083063 | -6.2317 | 0.0057631 | 0.021774 |
| novel_circ_0008565 | 0           | 7.546052703 | -6.2318 | 0.0057624 | 0.021774 |
| novel_circ_0018436 | 6.244869479 | 0           | 6.2323  | 0.0057641 | 0.021774 |
| hsa_circ_0008425   | 0           | 7.336430221 | -6.2143 | 0.0057719 | 0.021786 |
| hsa_circ_0004437   | 0           | 7.147638712 | -6.2057 | 0.0057999 | 0.021821 |
| hsa_circ_0008358   | 0           | 7.782324001 | -6.2552 | 0.0057961 | 0.021821 |
| hsa_circ_0080635   | 5.994665459 | 0           | 6.1992  | 0.0057915 | 0.021821 |
| hsa_circ_0080674   | 5.994665459 | 0           | 6.1992  | 0.0057915 | 0.021821 |
| hsa_circ_0057089   | 0.815518204 | 7.716750606 | -3.2659 | 0.0058071 | 0.02183  |
| hsa_circ_0003919   | 0           | 7.23113416  | -6.2037 | 0.0058229 | 0.021837 |
| hsa_circ_0009030   | 0           | 7.438817361 | -6.2209 | 0.0058135 | 0.021837 |
| hsa_circ_0076800   | 6.243443129 | 0           | 6.2198  | 0.005821  | 0.021837 |
| hsa_circ_0004985   | 3.14868954  | 17.70703986 | -2.3695 | 0.0058377 | 0.021847 |
| hsa_circ_0007504   | 0           | 7.649409483 | -6.2375 | 0.0058333 | 0.021847 |
| novel_circ_0003395 | 0           | 7.230164519 | -6.2027 | 0.0058443 | 0.021847 |
| novel_circ_0007064 | 0           | 7.2321038   | -6.2029 | 0.005843  | 0.021847 |
| hsa_circ_0004874   | 0           | 7.547991984 | -6.2282 | 0.0058534 | 0.021852 |
| hsa_circ_0008472   | 0           | 7.376152887 | -6.2262 | 0.0058549 | 0.021852 |
| hsa_circ_0078224   | 0           | 7.169439326 | -6.2107 | 0.0058641 | 0.021869 |
| novel_circ_0002636 | 0           | 7.875984377 | -6.2595 | 0.0058688 | 0.021869 |
| hsa_circ_0001345   | 0           | 7.3335213   | -6.2092 | 0.0058884 | 0.021882 |
| hsa_circ_0005373   | 0           | 7.255843695 | -6.2095 | 0.0058907 | 0.021882 |
| hsa_circ_0020915   | 6.783867217 | 0           | 6.2742  | 0.0058957 | 0.021882 |
| novel_circ_0009319 | 0           | 7.250025852 | -6.209  | 0.0058943 | 0.021882 |
| novel_circ_0019569 | 1.148607018 | 9.779697136 | -3.0568 | 0.0058788 | 0.021882 |
| novel_circ_0009987 | 0           | 7.125838098 | -6.1915 | 0.0059153 | 0.021937 |
| hsa_circ_0072351   | 0.583292834 | 7.921524886 | -3.3852 | 0.0059328 | 0.021967 |
| novel_circ_0021839 | 8.566973611 | 0.925692384 | 2.8854  | 0.0059327 | 0.021967 |
| hsa_circ_0079812   | 0           | 7.124868458 | -6.1893 | 0.0059639 | 0.022047 |
| novel_circ_0021248 | 0           | 7.124868458 | -6.1893 | 0.0059639 | 0.022047 |
| hsa_circ_0000483   | 0           | 7.753735904 | -6.2404 | 0.0059718 | 0.022059 |
| hsa_circ_0008664   | 0           | 7.021511677 | -6.1785 | 0.0060267 | 0.022174 |
| hsa_circ_0012134   | 5.962863916 | 0           | 6.1973  | 0.0060208 | 0.022174 |
| hsa_circ_0054894   | 0           | 7.562035474 | -6.2282 | 0.0060103 | 0.022174 |
| hsa_circ_0057523   | 0           | 7.021511677 | -6.1785 | 0.0060267 | 0.022174 |
| novel_circ_0002856 | 0           | 7.457709053 | -6.2192 | 0.0060248 | 0.022174 |
| hsa_circ_0077083   | 0           | 7.43687808  | -6.2115 | 0.0060341 | 0.022183 |
| hsa_circ_0024234   | 0           | 7.022481318 | -6.1774 | 0.0060534 | 0.022202 |
| novel_circ_0003412 | 0           | 7.022481318 | -6.1774 | 0.0060534 | 0.022202 |
| novel_circ_0003860 | 0           | 7.022481318 | -6.1774 | 0.0060534 | 0.022202 |
| hsa_circ_0031615   | 0           | 7.123898817 | -6.1848 | 0.0060653 | 0.022228 |
| hsa_circ_0068630   | 11.40603808 | 2.606379249 | 2.0836  | 0.0060725 | 0.022237 |
| hsa_circ_0001696   | 17.23766337 | 71.54696673 | -2.0159 | 0.006086  | 0.022269 |
| hsa_circ_0007917   | 0.583292834 | 7.379061808 | -3.2987 | 0.0060983 | 0.022297 |
| hsa_circ_0012824   | 0           | 7.479509667 | -6.2224 | 0.0061052 | 0.022305 |
| novel_circ_0012923 | 14.18568151 | 3.61653672  | 1.9553  | 0.0061111 | 0.022309 |
| novel_circ_0022044 | 2.779643426 | 13.78883    | -2.3432 | 0.0061423 | 0.022405 |
| hsa_circ_0002931   | 1.148607018 | 9.481902558 | -2.9984 | 0.0061545 | 0.022432 |
| hsa_circ_0005395   | 0           | 7.319306255 | -6.2165 | 0.0061724 | 0.022445 |
| hsa_circ_0006501   | 19.08009379 | 3.698092887 | 2.3762  | 0.0061687 | 0.022445 |
| hsa_circ_0025853   | 0           | 7.319306255 | -6.2165 | 0.0061724 | 0.022445 |
| hsa_circ_0006393   | 0.874939251 | 8.641473349 | -3.0056 | 0.0061958 | 0.022501 |
| hsa_circ_0006958   | 20.43876549 | 5.907027785 | 1.7446  | 0.0061975 | 0.022501 |
| hsa_circ_0077078   | 0           | 6.93898587  | -6.1708 | 0.006214  | 0.022543 |
| hsa_circ_0035944   | 110.4333914 | 37.37494964 | 1.5536  | 0.0062213 | 0.022552 |

|                    |             |             |         |           |          |
|--------------------|-------------|-------------|---------|-----------|----------|
| hsa_circ_0008433   | 0           | 7.210303186 | -6.1768 | 0.0062628 | 0.022652 |
| novel_circ_0007749 | 0           | 7.210303186 | -6.1768 | 0.0062628 | 0.022652 |
| novel_circ_0018382 | 10.21456232 | 2.039206636 | 2.2638  | 0.0062634 | 0.022652 |
| hsa_circ_0070934   | 0           | 7.103067844 | -6.1667 | 0.0062877 | 0.022722 |
| hsa_circ_0000213   | 0           | 6.937046589 | -6.1665 | 0.0063035 | 0.022727 |
| hsa_circ_0012439   | 0           | 6.937046589 | -6.1665 | 0.0063035 | 0.022727 |
| novel_circ_0010822 | 0           | 7.018602756 | -6.1666 | 0.0062943 | 0.022727 |
| hsa_circ_0015264   | 1.458232085 | 11.41484349 | -2.7129 | 0.006325  | 0.022787 |
| hsa_circ_0083536   | 5.819131727 | 0           | 6.1471  | 0.0063328 | 0.022797 |
| hsa_circ_0085124   | 6.5281781   | 0.462846192 | 3.4001  | 0.0063517 | 0.022847 |
| hsa_circ_0006007   | 5.787330185 | 19.59153137 | -1.7138 | 0.0063802 | 0.022932 |
| novel_circ_0016564 | 0           | 6.812858836 | -6.1459 | 0.0064018 | 0.022992 |
| novel_circ_0000921 | 0           | 6.896354283 | -6.1446 | 0.00641   | 0.023004 |
| hsa_circ_0000936   | 8.608416007 | 0.925692384 | 2.8927  | 0.0064446 | 0.023055 |
| hsa_circ_0008083   | 0           | 6.960786484 | -6.1682 | 0.0064301 | 0.023055 |
| hsa_circ_0031610   | 0           | 7.173317887 | -6.1833 | 0.006449  | 0.023055 |
| novel_circ_0005183 | 0           | 7.417986388 | -6.188  | 0.0064354 | 0.023055 |
| novel_circ_0020306 | 6.247598887 | 0           | 6.2165  | 0.0064452 | 0.023055 |
| hsa_circ_0030508   | 0           | 6.790088581 | -6.1338 | 0.0064645 | 0.023093 |
| novel_circ_0001635 | 5.727909138 | 0           | 6.1332  | 0.0064706 | 0.023097 |
| hsa_circ_0002688   | 0           | 7.417016747 | -6.1863 | 0.0064775 | 0.023104 |
| hsa_circ_0002207   | 0           | 6.897323924 | -6.1405 | 0.0065153 | 0.023107 |
| hsa_circ_0003617   | 5.860574123 | 0           | 6.1451  | 0.0064914 | 0.023107 |
| hsa_circ_0007235   | 0           | 6.809949914 | -6.1404 | 0.0065227 | 0.023107 |
| hsa_circ_0031757   | 0           | 6.892475722 | -6.14   | 0.0065189 | 0.023107 |
| hsa_circ_0083125   | 6.11768959  | 0           | 6.1689  | 0.0064995 | 0.023107 |
| hsa_circ_0083458   | 0           | 6.789118941 | -6.1325 | 0.0064939 | 0.023107 |
| novel_circ_0012275 | 5.837110377 | 0           | 6.1538  | 0.006497  | 0.023107 |
| novel_circ_0019761 | 0           | 7.213040553 | -6.1927 | 0.0065073 | 0.023107 |
| novel_circ_0019870 | 0           | 6.897323924 | -6.1405 | 0.0065153 | 0.023107 |
| hsa_circ_0047378   | 0           | 7.025390239 | -6.157  | 0.006533  | 0.023125 |
| hsa_circ_0001578   | 10.31685211 | 29.6396369  | -1.4921 | 0.0065757 | 0.023178 |
| hsa_circ_0004212   | 51.34372368 | 16.70140103 | 1.6127  | 0.0065778 | 0.023178 |
| hsa_circ_0061722   | 0           | 6.961756124 | -6.1625 | 0.0065556 | 0.023178 |
| novel_circ_0000371 | 0           | 6.792027862 | -6.1292 | 0.0065811 | 0.023178 |
| novel_circ_0006989 | 5.86891192  | 0           | 6.1422  | 0.0065627 | 0.023178 |
| novel_circ_0010369 | 5.6712175   | 0           | 6.1364  | 0.0065825 | 0.023178 |
| novel_circ_0011221 | 7.951879235 | 1.00724855  | 3.0047  | 0.0065772 | 0.023178 |
| novel_circ_0009524 | 0           | 6.685762161 | -6.1191 | 0.0066191 | 0.023289 |
| novel_circ_0018567 | 5.586906357 | 0           | 6.1139  | 0.0066449 | 0.023345 |
| novel_circ_0020462 | 5.586906357 | 0           | 6.1139  | 0.0066449 | 0.023345 |
| hsa_circ_0005587   | 11.55395231 | 2.017406022 | 2.5389  | 0.00667   | 0.023415 |
| hsa_circ_0081006   | 0           | 6.995832502 | -6.1425 | 0.0066759 | 0.023418 |
| hsa_circ_0025619   | 0           | 6.898293564 | -6.1337 | 0.0066882 | 0.023442 |
| novel_circ_0005365 | 0.583292834 | 8.004050693 | -3.3865 | 0.0066928 | 0.023442 |
| hsa_circ_0002663   | 0           | 7.214979834 | -6.1838 | 0.0067009 | 0.023443 |
| hsa_circ_0041695   | 5.653238849 | 0           | 6.1177  | 0.006703  | 0.023443 |
| novel_circ_0003862 | 2.371884324 | 12.86975355 | -2.478  | 0.0067222 | 0.02349  |
| novel_circ_0007454 | 5.636686549 | 0           | 6.1146  | 0.0067265 | 0.02349  |
| hsa_circ_0000085   | 0           | 6.78717966  | -6.1222 | 0.0067458 | 0.023504 |
| hsa_circ_0013171   | 0           | 6.808980274 | -6.1308 | 0.0067439 | 0.023504 |
| hsa_circ_0066241   | 0           | 6.78717966  | -6.1222 | 0.0067458 | 0.023504 |
| hsa_circ_0027851   | 1.148607018 | 8.932651998 | -2.926  | 0.0067844 | 0.023621 |
| novel_circ_0005703 | 8.434308626 | 29.46488888 | -1.7827 | 0.0067964 | 0.023646 |
| hsa_circ_0086190   | 0           | 6.768287968 | -6.1106 | 0.0068069 | 0.023647 |
| novel_circ_0009760 | 0           | 6.768287968 | -6.1106 | 0.0068069 | 0.023647 |
| hsa_circ_0004496   | 0           | 6.874553669 | -6.1187 | 0.0068416 | 0.023705 |
| hsa_circ_0031449   | 0           | 6.962725765 | -6.1496 | 0.0068435 | 0.023705 |
| hsa_circ_0046909   | 0           | 6.871644748 | -6.1184 | 0.0068438 | 0.023705 |
| novel_circ_0016750 | 0           | 6.871644748 | -6.1184 | 0.0068438 | 0.023705 |
| hsa_circ_0066970   | 0           | 6.662991906 | -6.0992 | 0.0068706 | 0.02378  |
| hsa_circ_0073396   | 0.583292834 | 7.273765747 | -3.2826 | 0.0069052 | 0.023864 |
| novel_circ_0010661 | 5.777689331 | 0           | 6.1203  | 0.006902  | 0.023864 |
| hsa_circ_0015263   | 0.815518204 | 7.461587615 | -3.205  | 0.0069273 | 0.02387  |
| hsa_circ_0086296   | 12.73160518 | 2.354125179 | 2.4721  | 0.0069324 | 0.02387  |

|                    |             |             |         |           |          |
|--------------------|-------------|-------------|---------|-----------|----------|
| novel_circ_0000673 | 5.520573864 | 0           | 6.0964  | 0.0069214 | 0.02387  |
| novel_circ_0005616 | 0           | 6.662022266 | -6.0971 | 0.0069248 | 0.02387  |
| novel_circ_0021292 | 0           | 6.662022266 | -6.0971 | 0.0069248 | 0.02387  |
| novel_circ_0008784 | 0           | 7.519403887 | -6.1773 | 0.0069401 | 0.023879 |
| hsa_circ_0000357   | 22.01311026 | 4.776561121 | 2.1465  | 0.0069508 | 0.023885 |
| hsa_circ_0015211   | 0           | 6.558665486 | -6.0869 | 0.0069623 | 0.023885 |
| hsa_circ_0035094   | 0           | 6.558665486 | -6.0869 | 0.0069623 | 0.023885 |
| hsa_circ_0082583   | 0           | 7.082236871 | -6.133  | 0.0069623 | 0.023885 |
| hsa_circ_0013012   | 0           | 6.557695845 | -6.0857 | 0.0069933 | 0.023956 |
| hsa_circ_0085611   | 0           | 6.557695845 | -6.0857 | 0.0069933 | 0.023956 |
| hsa_circ_0006056   | 0           | 6.975001529 | -6.1214 | 0.0070159 | 0.024015 |
| hsa_circ_0000087   | 2.797622076 | 13.39235529 | -2.2156 | 0.0070394 | 0.024078 |
| novel_circ_0000577 | 5.719571342 | 0           | 6.11    | 0.0070561 | 0.024118 |
| novel_circ_0002883 | 0           | 6.87649295  | -6.1108 | 0.0070639 | 0.024127 |
| hsa_circ_0055945   | 0           | 6.688671082 | -6.1009 | 0.0070754 | 0.02414  |
| hsa_circ_0089902   | 0           | 6.560604766 | -6.0824 | 0.0070851 | 0.02414  |
| novel_circ_0013220 | 0           | 6.556726205 | -6.082  | 0.0070883 | 0.02414  |
| novel_circ_0017178 | 0           | 6.560604766 | -6.0824 | 0.0070851 | 0.02414  |
| hsa_circ_0018478   | 0           | 6.454339065 | -6.0726 | 0.0071106 | 0.024181 |
| novel_circ_0009886 | 5.555104814 | 0           | 6.1033  | 0.0071159 | 0.024181 |
| novel_circ_0021296 | 0           | 6.453369424 | -6.0725 | 0.0071113 | 0.024181 |
| hsa_circ_0002063   | 5.54546396  | 0           | 6.0889  | 0.0071584 | 0.024307 |
| novel_circ_0016792 | 5.618707899 | 0           | 6.0828  | 0.0071721 | 0.024336 |
| hsa_circ_0011536   | 0           | 6.455308705 | -6.0699 | 0.0071813 | 0.02434  |
| novel_circ_0003736 | 0           | 6.452399784 | -6.0696 | 0.0071837 | 0.02434  |
| hsa_circ_0065052   | 5.404461179 | 0           | 6.0744  | 0.0072132 | 0.024387 |
| novel_circ_0003031 | 0           | 6.496970652 | -6.0867 | 0.0072101 | 0.024387 |
| novel_circ_0020275 | 5.404461179 | 0           | 6.0744  | 0.0072132 | 0.024387 |
| hsa_circ_0024843   | 0           | 6.731302669 | -6.1097 | 0.0072341 | 0.02444  |
| hsa_circ_0008038   | 0           | 6.561574407 | -6.0762 | 0.0072537 | 0.024471 |
| novel_circ_0009183 | 0           | 6.710471696 | -6.1019 | 0.0072503 | 0.024471 |
| hsa_circ_0001997   | 3.520491342 | 17.82267241 | -2.3393 | 0.0072644 | 0.024489 |
| hsa_circ_0008272   | 29.92212075 | 10.15146231 | 1.5646  | 0.0072727 | 0.0245   |
| hsa_circ_0002059   | 0           | 6.456278345 | -6.0643 | 0.0073331 | 0.024523 |
| hsa_circ_0004456   | 0           | 6.456278345 | -6.0643 | 0.0073331 | 0.024523 |
| hsa_circ_0006323   | 10.76605361 | 31.6182899  | -1.5243 | 0.0073005 | 0.024523 |
| hsa_circ_0030763   | 0           | 6.456278345 | -6.0643 | 0.0073331 | 0.024523 |
| hsa_circ_0054391   | 0           | 6.348073363 | -6.0555 | 0.007328  | 0.024523 |
| novel_circ_0000242 | 0           | 6.456278345 | -6.0643 | 0.0073331 | 0.024523 |
| novel_circ_0003273 | 16.87264972 | 3.763494728 | 2.0944  | 0.0072863 | 0.024523 |
| novel_circ_0011966 | 5.734820584 | 0           | 6.0892  | 0.0073222 | 0.024523 |
| novel_circ_0017330 | 0           | 6.348073363 | -6.0555 | 0.007328  | 0.024523 |
| novel_circ_0021773 | 0           | 6.451430143 | -6.0638 | 0.0073374 | 0.024523 |
| novel_circ_0021860 | 0           | 6.348073363 | -6.0555 | 0.007328  | 0.024523 |
| hsa_circ_0006456   | 1.223277306 | 10.89708995 | -3.144  | 0.0073995 | 0.024703 |
| hsa_circ_0007178   | 8.500641118 | 25.22450447 | -1.5529 | 0.0074043 | 0.024703 |
| novel_circ_0001877 | 9.530406043 | 1.344937348 | 2.8226  | 0.0074073 | 0.024703 |
| novel_circ_0019205 | 0           | 6.536864872 | -6.0602 | 0.0074226 | 0.024737 |
| hsa_circ_0007559   | 0           | 6.605175634 | -6.086  | 0.007434  | 0.024757 |
| hsa_circ_0007418   | 0           | 6.350982284 | -6.0508 | 0.0074565 | 0.024806 |
| hsa_circ_0044708   | 0           | 6.43156881  | -6.0494 | 0.0074594 | 0.024806 |
| hsa_circ_0006554   | 12.37768502 | 42.42492536 | -1.7749 | 0.0074794 | 0.024854 |
| hsa_circ_0008809   | 5.354680986 | 0           | 6.0594  | 0.0074845 | 0.024854 |
| novel_circ_0002437 | 5.693378188 | 0           | 6.0787  | 0.0074922 | 0.024862 |
| hsa_circ_0005645   | 11.40603808 | 1.678747584 | 2.7684  | 0.0075008 | 0.02487  |
| novel_circ_0019803 | 0           | 6.640221652 | -6.067  | 0.0075053 | 0.02487  |
| hsa_circ_0005328   | 2.023546268 | 12.30452022 | -2.514  | 0.0075412 | 0.024912 |
| hsa_circ_0009172   | 2.857043123 | 15.48743892 | -2.3106 | 0.0075344 | 0.024912 |
| hsa_circ_0016601   | 0           | 6.32724239  | -6.0375 | 0.007533  | 0.024912 |
| novel_circ_0001581 | 5.452815021 | 0           | 6.0537  | 0.0075447 | 0.024912 |
| novel_circ_0011104 | 0           | 6.32724239  | -6.0375 | 0.007533  | 0.024912 |
| hsa_circ_0071176   | 0           | 6.368904336 | -6.0559 | 0.0075537 | 0.024925 |
| novel_circ_0003021 | 0           | 6.746487354 | -6.0749 | 0.0075656 | 0.024929 |
| novel_circ_0004900 | 0           | 6.746487354 | -6.0749 | 0.0075656 | 0.024929 |
| hsa_circ_0003209   | 0           | 6.576587538 | -6.0719 | 0.0075825 | 0.024949 |

|                    |             |             |         |           |          |
|--------------------|-------------|-------------|---------|-----------|----------|
| novel_circ_0018392 | 0           | 6.392644231 | -6.0632 | 0.0075789 | 0.024949 |
| hsa_circ_0006565   | 0           | 6.450460503 | -6.0541 | 0.0075971 | 0.024979 |
| hsa_circ_0000371   | 0           | 6.222915969 | -6.0235 | 0.0076709 | 0.025014 |
| hsa_circ_0003501   | 1.982103872 | 10.76417543 | -2.3303 | 0.0076522 | 0.025014 |
| hsa_circ_0003715   | 6.163287745 | 22.93772041 | -1.8285 | 0.0076393 | 0.025014 |
| hsa_circ_0014156   | 5.204037351 | 0           | 6.0264  | 0.0076337 | 0.025014 |
| hsa_circ_0047869   | 0           | 6.245686223 | -6.0355 | 0.0076298 | 0.025014 |
| hsa_circ_0087828   | 0           | 6.221946328 | -6.0234 | 0.0076718 | 0.025014 |
| novel_circ_0000571 | 0           | 6.222915969 | -6.0235 | 0.0076709 | 0.025014 |
| novel_circ_0010075 | 8.826818486 | 30.79076298 | -1.7686 | 0.0076344 | 0.025014 |
| novel_circ_0010554 | 5.204037351 | 0           | 6.0264  | 0.0076337 | 0.025014 |
| novel_circ_0016252 | 0           | 6.265547556 | -6.0431 | 0.0076654 | 0.025014 |
| novel_circ_0018033 | 0           | 6.539773793 | -6.0526 | 0.0076553 | 0.025014 |
| novel_circ_0019110 | 0           | 6.325303109 | -6.0328 | 0.0076665 | 0.025014 |
| hsa_circ_0008938   | 1.982103872 | 11.24591332 | -2.4003 | 0.0076831 | 0.025023 |
| novel_circ_0018852 | 2.505975659 | 14.66977997 | -2.5042 | 0.0076853 | 0.025023 |
| hsa_circ_0006359   | 23.75477426 | 6.332090592 | 1.8957  | 0.0077094 | 0.025083 |
| hsa_circ_0062804   | 11.61337336 | 1.683595786 | 2.7846  | 0.0077147 | 0.025083 |
| novel_circ_0007750 | 0           | 6.220976688 | -6.0207 | 0.0077482 | 0.02514  |
| novel_circ_0015698 | 0           | 6.223885609 | -6.021  | 0.0077454 | 0.02514  |
| novel_circ_0022009 | 5.179147255 | 0           | 6.0201  | 0.0077471 | 0.02514  |
| hsa_circ_0031419   | 1.398811038 | 9.392589268 | -2.6584 | 0.0078043 | 0.025269 |
| hsa_circ_0042986   | 0           | 6.139420521 | -6.0202 | 0.0078026 | 0.025269 |
| novel_circ_0021146 | 5.369930229 | 0           | 6.0358  | 0.0077937 | 0.025269 |
| hsa_circ_0001906   | 3.613140281 | 16.21029631 | -2.144  | 0.0078454 | 0.025369 |
| hsa_circ_0006267   | 0           | 6.140390162 | -6.018  | 0.0078623 | 0.025369 |
| hsa_circ_0008637   | 0           | 6.241807661 | -6.0267 | 0.0078565 | 0.025369 |
| hsa_circ_0068090   | 11.55668172 | 2.354125179 | 2.3446  | 0.007848  | 0.025369 |
| novel_circ_0012898 | 0           | 6.540743433 | -6.0459 | 0.0078586 | 0.025369 |
| hsa_circ_0040364   | 8.036190378 | 1.00724855  | 3.0155  | 0.0078892 | 0.025421 |
| hsa_circ_0086466   | 0           | 6.116650267 | -6.0068 | 0.0078846 | 0.025421 |
| hsa_circ_0001020   | 18.35722453 | 50.57466745 | -1.454  | 0.0078984 | 0.025433 |
| novel_circ_0010827 | 0           | 6.220007048 | -6.015  | 0.0079103 | 0.025454 |
| novel_circ_0003985 | 5.253817543 | 0           | 6.0193  | 0.0079442 | 0.025545 |
| novel_circ_0002306 | 23.98281759 | 3.021745651 | 2.9316  | 0.0079542 | 0.02556  |
| hsa_circ_0003576   | 0           | 6.119559188 | -6.0023 | 0.0080197 | 0.025752 |
| hsa_circ_0002165   | 0           | 6.854692336 | -6.0695 | 0.0080313 | 0.025772 |
| hsa_circ_0027477   | 0           | 6.28734817  | -6.0353 | 0.008065  | 0.025862 |
| novel_circ_0019762 | 0           | 6.013293487 | -5.9909 | 0.0080826 | 0.025901 |
| novel_circ_0016541 | 17.73521871 | 4.389453253 | 2.0215  | 0.0080998 | 0.025938 |
| hsa_circ_0001807   | 0           | 6.323363828 | -6.0167 | 0.0081335 | 0.026    |
| novel_circ_0003474 | 0           | 6.323363828 | -6.0167 | 0.0081335 | 0.026    |
| novel_circ_0011617 | 0           | 6.162190775 | -6.0164 | 0.0081357 | 0.026    |
| hsa_circ_0002186   | 0           | 6.0350941   | -5.9977 | 0.008169  | 0.026074 |
| hsa_circ_0020252   | 0           | 6.03412446  | -5.9976 | 0.00817   | 0.026074 |
| hsa_circ_0004058   | 59.64251462 | 148.2771342 | -1.309  | 0.0081778 | 0.026075 |
| novel_circ_0002878 | 0           | 6.304472135 | -6.0056 | 0.0081817 | 0.026075 |
| hsa_circ_0079375   | 5.119726208 | 0           | 5.983   | 0.0081987 | 0.026094 |
| novel_circ_0007253 | 5.119726208 | 0           | 5.983   | 0.0081987 | 0.026094 |
| hsa_circ_0031641   | 0           | 6.199176074 | -5.9946 | 0.0082099 | 0.026112 |
| novel_circ_0002575 | 5.197125905 | 0           | 6.0158  | 0.0082318 | 0.026128 |
| novel_circ_0004484 | 0           | 6.094849653 | -5.9842 | 0.0082289 | 0.026128 |
| novel_circ_0007939 | 5.197125905 | 0           | 6.0158  | 0.0082318 | 0.026128 |
| hsa_circ_0070190   | 27.96357764 | 80.49025218 | -1.5048 | 0.0082418 | 0.026142 |
| hsa_circ_0070268   | 0           | 6.307381057 | -6.0035 | 0.0082608 | 0.026159 |
| hsa_circ_0084941   | 0           | 6.240838021 | -6.0121 | 0.0082529 | 0.026159 |
| novel_circ_0015060 | 5.172235808 | 0           | 6.0125  | 0.0082639 | 0.026159 |
| hsa_circ_0006893   | 0           | 6.114710986 | -5.9928 | 0.008281  | 0.02616  |
| novel_circ_0013647 | 0           | 6.114710986 | -5.9928 | 0.008281  | 0.02616  |
| novel_circ_0013931 | 6.794934421 | 0.673438314 | 3.3228  | 0.0082775 | 0.02616  |
| hsa_circ_0000712   | 0           | 5.991492873 | -5.9718 | 0.008315  | 0.026182 |
| hsa_circ_0006693   | 2.041524919 | 14.35988118 | -2.5989 | 0.0082967 | 0.026182 |
| hsa_circ_0042098   | 0           | 6.408798556 | -6.0117 | 0.0083134 | 0.026182 |
| hsa_circ_0067880   | 0           | 5.990523232 | -5.9717 | 0.008316  | 0.026182 |
| novel_circ_0012529 | 0.874939251 | 9.390649988 | -3.108  | 0.0083037 | 0.026182 |

|                    |             |             |         |           |          |
|--------------------|-------------|-------------|---------|-----------|----------|
| novel_circ_0013903 | 5.028503619 | 0           | 5.9695  | 0.0083288 | 0.026187 |
| novel_circ_0014298 | 5.327061482 | 0           | 6.0008  | 0.0083253 | 0.026187 |
| hsa_circ_0000786   | 1.749878502 | 13.33066046 | -2.7126 | 0.0083504 | 0.026237 |
| hsa_circ_0002871   | 25.19906016 | 4.895900673 | 2.292   | 0.0083735 | 0.026287 |
| hsa_circ_0026297   | 16.77178627 | 4.159969438 | 2.0383  | 0.0083854 | 0.026287 |
| hsa_circ_0049303   | 13.19735898 | 3.300648536 | 1.9314  | 0.0083946 | 0.026287 |
| novel_circ_0000114 | 0           | 5.992462513 | -5.9694 | 0.0083938 | 0.026287 |
| novel_circ_0019916 | 0           | 5.992462513 | -5.9694 | 0.0083938 | 0.026287 |
| hsa_circ_0082688   | 0           | 6.308350697 | -5.9992 | 0.0084023 | 0.026294 |
| novel_circ_0017143 | 0           | 6.010384565 | -5.9786 | 0.0084277 | 0.026338 |
| novel_circ_0021863 | 0           | 5.907027785 | -5.9697 | 0.0084241 | 0.026338 |
| novel_circ_0003543 | 0           | 6.1365116   | -5.9964 | 0.0084402 | 0.026347 |
| novel_circ_0008321 | 5.053393715 | 0           | 5.9679  | 0.0084476 | 0.026347 |
| novel_circ_0011583 | 0           | 6.845965573 | -6.0551 | 0.0084432 | 0.026347 |
| hsa_circ_0002682   | 1.914345029 | 12.9484008  | -2.7292 | 0.0084644 | 0.026376 |
| hsa_circ_0045220   | 0           | 5.886196812 | -5.9571 | 0.0084737 | 0.026376 |
| hsa_circ_0067480   | 1.349030846 | 9.355775524 | -2.6495 | 0.0084735 | 0.026376 |
| hsa_circ_0001495   | 112.5219145 | 42.68865711 | 1.3949  | 0.0084881 | 0.026403 |
| hsa_circ_0002083   | 0           | 6.514094618 | -6.0158 | 0.0085153 | 0.02647  |
| novel_circ_0011213 | 4.978723426 | 0           | 5.9578  | 0.0085487 | 0.026538 |
| novel_circ_0014963 | 4.978723426 | 0           | 5.9578  | 0.0085487 | 0.026538 |
| hsa_circ_0001771   | 0.874939251 | 8.802646401 | -3.0103 | 0.0085634 | 0.026567 |
| hsa_circ_0000698   | 111.0209188 | 296.7400913 | -1.41   | 0.0086312 | 0.02667  |
| hsa_circ_0003288   | 0           | 6.22679453  | -5.9917 | 0.0086152 | 0.02667  |
| hsa_circ_0069226   | 0           | 6.22679453  | -5.9917 | 0.0086152 | 0.02667  |
| hsa_circ_0084904   | 0           | 5.906058144 | -5.9624 | 0.0086309 | 0.02667  |
| novel_circ_0009670 | 0           | 5.909936706 | -5.9629 | 0.0086266 | 0.02667  |
| novel_circ_0013358 | 4.93728103  | 0           | 5.9509  | 0.0086171 | 0.02667  |
| hsa_circ_0002029   | 0           | 5.78090075  | -5.9398 | 0.0087142 | 0.026732 |
| hsa_circ_0002275   | 0           | 6.512155337 | -6.0099 | 0.0087002 | 0.026732 |
| hsa_circ_0002601   | 0           | 5.781870391 | -5.94   | 0.0087132 | 0.026732 |
| hsa_circ_0002793   | 0           | 5.888136092 | -5.9511 | 0.0086635 | 0.026732 |
| hsa_circ_0032135   | 0           | 5.781870391 | -5.94   | 0.0087132 | 0.026732 |
| hsa_circ_0083234   | 0.815518204 | 7.022481318 | -3.1259 | 0.0087029 | 0.026732 |
| novel_circ_0002759 | 0           | 5.884257531 | -5.9507 | 0.0086679 | 0.026732 |
| novel_circ_0003679 | 0           | 6.037033381 | -5.9795 | 0.0086721 | 0.026732 |
| novel_circ_0012468 | 0           | 5.78090075  | -5.9398 | 0.0087142 | 0.026732 |
| novel_circ_0019985 | 0           | 5.781870391 | -5.94   | 0.0087132 | 0.026732 |
| novel_circ_0021739 | 0           | 5.781870391 | -5.94   | 0.0087132 | 0.026732 |
| hsa_circ_0084464   | 8.619483211 | 27.80617418 | -1.6353 | 0.0087347 | 0.026762 |
| novel_circ_0020802 | 0           | 6.183991389 | -6.0014 | 0.0087353 | 0.026762 |
| novel_circ_0012267 | 0           | 6.091940732 | -5.965  | 0.0088319 | 0.02704  |
| hsa_circ_0063397   | 19.39663031 | 6.117619907 | 1.6339  | 0.0088539 | 0.02709  |
| hsa_circ_0009061   | 2.098216557 | 11.09604639 | -2.3408 | 0.0089608 | 0.027399 |
| hsa_circ_0004616   | 9.515156801 | 1.342998067 | 2.8228  | 0.0089871 | 0.027461 |
| novel_circ_0000526 | 0           | 5.865365838 | -5.9292 | 0.0090041 | 0.027495 |
| hsa_circ_0000111   | 23.62629131 | 64.3121391  | -1.4377 | 0.0090127 | 0.027504 |
| novel_circ_0000823 | 4.862610741 | 0           | 5.9305  | 0.009037  | 0.02756  |
| hsa_circ_0077409   | 59.21259483 | 24.9722504  | 1.245   | 0.0090457 | 0.027568 |
| hsa_circ_0002051   | 0           | 5.759100136 | -5.917  | 0.009064  | 0.027588 |
| hsa_circ_0011075   | 0           | 5.759100136 | -5.917  | 0.009064  | 0.027588 |
| hsa_circ_0007549   | 0           | 5.778961469 | -5.9279 | 0.0090775 | 0.027611 |
| novel_circ_0014575 | 4.413409243 | 20.68341656 | -2.1511 | 0.009093  | 0.02764  |
| hsa_circ_0007302   | 7.47778764  | 23.35308682 | -1.6062 | 0.009104  | 0.027656 |
| novel_circ_0019500 | 0           | 5.862456917 | -5.9255 | 0.0091206 | 0.027688 |
| hsa_circ_0062794   | 7.958790681 | 0.925692384 | 2.7793  | 0.0091337 | 0.02771  |
| novel_circ_0008884 | 0           | 5.966783338 | -5.9345 | 0.0091729 | 0.027811 |
| hsa_circ_0009133   | 24.74712926 | 63.23464051 | -1.3315 | 0.0091903 | 0.027845 |
| hsa_circ_0091291   | 7.368586401 | 1.00724855  | 2.8929  | 0.0092137 | 0.027898 |
| hsa_circ_0013148   | 0           | 5.699344584 | -5.9231 | 0.0092512 | 0.02795  |
| hsa_circ_0030154   | 0           | 5.653804075 | -5.9013 | 0.0092548 | 0.02795  |
| hsa_circ_0090160   | 0.874939251 | 8.448974833 | -2.9447 | 0.0092394 | 0.02795  |
| novel_circ_0015849 | 0           | 5.655743356 | -5.9015 | 0.0092524 | 0.02795  |
| novel_circ_0012142 | 0           | 5.67851361  | -5.9124 | 0.0092725 | 0.027985 |
| novel_circ_0017475 | 0           | 5.826441259 | -5.9374 | 0.0093582 | 0.028226 |

|                    |             |             |         |           |          |
|--------------------|-------------|-------------|---------|-----------|----------|
| novel_circ_0013991 | 0           | 5.572247909 | -5.8996 | 0.009375  | 0.028244 |
| novel_circ_0021266 | 0           | 5.571278268 | -5.8995 | 0.0093762 | 0.028244 |
| hsa_circ_0001911   | 0           | 5.965813697 | -5.9281 | 0.009394  | 0.028279 |
| hsa_circ_0005236   | 0           | 5.549477654 | -5.8859 | 0.0094379 | 0.028301 |
| hsa_circ_0008040   | 0           | 5.550447295 | -5.886  | 0.0094366 | 0.028301 |
| novel_circ_0011140 | 0           | 5.549477654 | -5.8859 | 0.0094379 | 0.028301 |
| novel_circ_0014158 | 0           | 5.550447295 | -5.886  | 0.0094366 | 0.028301 |
| novel_circ_0014272 | 0           | 5.549477654 | -5.8859 | 0.0094379 | 0.028301 |
| novel_circ_0021094 | 7.716924456 | 1.00724855  | 2.9342  | 0.0094295 | 0.028301 |
| novel_circ_0009565 | 22.2383009  | 3.738785193 | 2.4982  | 0.0094464 | 0.028309 |
| hsa_circ_0004888   | 0.874939251 | 7.949143342 | -2.8842 | 0.0094538 | 0.028313 |
| hsa_circ_0001496   | 0           | 5.570308628 | -5.8937 | 0.0095502 | 0.028492 |
| hsa_circ_00086694  | 4.803189695 | 0           | 5.8929  | 0.0095345 | 0.028492 |
| novel_circ_0008771 | 0           | 6.077897242 | -5.9351 | 0.0095494 | 0.028492 |
| novel_circ_0014410 | 4.711967106 | 0           | 5.883   | 0.0095293 | 0.028492 |
| novel_circ_0017951 | 2.273750289 | 11.7694847  | -2.2516 | 0.0095435 | 0.028492 |
| novel_circ_0018544 | 4.944192476 | 0           | 5.9084  | 0.0095334 | 0.028492 |
| hsa_circ_0012440   | 0           | 5.700314224 | -5.9121 | 0.0095798 | 0.028562 |
| hsa_circ_0076401   | 4.761747298 | 0           | 5.8854  | 0.0096175 | 0.028638 |
| novel_circ_0019805 | 4.761747298 | 0           | 5.8854  | 0.0096175 | 0.028638 |
| hsa_circ_0000836   | 6.468757054 | 20.87300616 | -1.6692 | 0.0096385 | 0.028665 |
| novel_circ_0015874 | 0           | 5.868274759 | -5.9112 | 0.009639  | 0.028665 |
| hsa_circ_0000106   | 6.700982424 | 22.34891874 | -1.7355 | 0.0096672 | 0.028731 |
| hsa_circ_0004327   | 0           | 5.651864794 | -5.888  | 0.0096998 | 0.028758 |
| hsa_circ_0005265   | 7.428007447 | 22.6389562  | -1.562  | 0.0096866 | 0.028758 |
| hsa_circ_0022601   | 0.583292834 | 7.002619985 | -3.2029 | 0.009707  | 0.028758 |
| hsa_circ_0065244   | 0           | 5.594048522 | -5.8986 | 0.0097056 | 0.028758 |
| novel_circ_0013554 | 4.620744517 | 0           | 5.8686  | 0.0096915 | 0.028758 |
| hsa_circ_0005704   | 4.388519147 | 15.62035344 | -1.7703 | 0.0097267 | 0.028798 |
| hsa_circ_0001486   | 1.148607018 | 9.35560397  | -2.988  | 0.0097697 | 0.028907 |
| hsa_circ_0002961   | 0           | 5.444181593 | -5.8656 | 0.0097846 | 0.028932 |
| hsa_circ_0030567   | 0           | 5.466951847 | -5.8762 | 0.0098058 | 0.028977 |
| hsa_circ_0003438   | 4.595854421 | 0           | 5.862   | 0.0098347 | 0.029025 |
| novel_circ_0002208 | 4.595854421 | 0           | 5.862   | 0.0098347 | 0.029025 |
| hsa_circ_0005164   | 0           | 5.721145197 | -5.9119 | 0.0098435 | 0.029033 |
| novel_circ_0016915 | 0           | 6.174466539 | -5.9357 | 0.0098785 | 0.029118 |
| novel_circ_0019973 | 0           | 5.632003461 | -5.87   | 0.0099342 | 0.029264 |
| novel_circ_0018704 | 0           | 5.527677041 | -5.8589 | 0.0099436 | 0.029273 |
| hsa_circ_0091244   | 0           | 5.737299523 | -5.8801 | 0.0099741 | 0.029344 |
| hsa_circ_0002500   | 8.707976392 | 26.256291   | -1.5975 | 0.010028  | 0.029439 |
| hsa_circ_00084188  | 0           | 5.634912383 | -5.8672 | 0.010051  | 0.029439 |
| novel_circ_0000441 | 0           | 5.5267074   | -5.8563 | 0.010036  | 0.029439 |
| novel_circ_0009646 | 0           | 5.42335062  | -5.8452 | 0.010056  | 0.029439 |
| novel_circ_0012561 | 0           | 5.631033821 | -5.8667 | 0.010057  | 0.029439 |
| novel_circ_0018087 | 0           | 5.634912383 | -5.8672 | 0.010051  | 0.029439 |
| novel_circ_0018430 | 0           | 5.529616321 | -5.8567 | 0.010032  | 0.029439 |
| novel_circ_0020183 | 4.670524709 | 0           | 5.8631  | 0.01005   | 0.029439 |
| hsa_circ_0035298   | 0           | 5.42432026  | -5.844  | 0.010107  | 0.029567 |
| novel_circ_0012766 | 1.458232085 | 10.7205742  | -2.6227 | 0.01017   | 0.029732 |
| novel_circ_0001510 | 0           | 5.735360242 | -5.8742 | 0.010195  | 0.029787 |
| hsa_circ_0001621   | 0           | 5.841625944 | -5.8847 | 0.010227  | 0.02986  |
| novel_circ_0020606 | 0           | 5.52573776  | -5.851  | 0.010232  | 0.02986  |
| hsa_circ_0001666   | 0           | 5.635882023 | -5.8616 | 0.010269  | 0.02988  |
| hsa_circ_0002168   | 4.554412024 | 0           | 5.8444  | 0.010272  | 0.02988  |
| hsa_circ_0005965   | 0           | 5.318054558 | -5.8288 | 0.010275  | 0.02988  |
| hsa_circ_0019172   | 0           | 5.421411339 | -5.8391 | 0.010276  | 0.02988  |
| novel_circ_0007987 | 0           | 5.553356216 | -5.8614 | 0.010282  | 0.02988  |
| novel_circ_0009645 | 0           | 5.341794453 | -5.841  | 0.010284  | 0.02988  |
| novel_circ_0017292 | 0           | 5.319024199 | -5.8289 | 0.010274  | 0.02988  |
| hsa_circ_0002535   | 22.66130924 | 6.451430143 | 1.7862  | 0.010298  | 0.029883 |
| hsa_circ_0066535   | 7.058961334 | 23.82853833 | -1.7594 | 0.010294  | 0.029883 |
| hsa_circ_0001542   | 0           | 5.488752461 | -5.8695 | 0.010311  | 0.029901 |
| hsa_circ_0004374   | 25.69400939 | 9.629830207 | 1.4042  | 0.01037   | 0.030053 |
| hsa_circ_0004730   | 0.583292834 | 6.682853239 | -3.1525 | 0.010441  | 0.030242 |
| hsa_circ_0005624   | 1.914345029 | 12.63833045 | -2.6945 | 0.01052   | 0.030453 |

|                    |             |             |         |          |          |
|--------------------|-------------|-------------|---------|----------|----------|
| hsa_circ_0031749   | 0           | 5.235528751 | -5.8232 | 0.010546 | 0.030469 |
| hsa_circ_0047700   | 0           | 5.213728138 | -5.8111 | 0.010543 | 0.030469 |
| novel_circ_0013617 | 0.815518204 | 8.091424702 | -3.2611 | 0.010542 | 0.030469 |
| novel_circ_0017999 | 0           | 5.426259541 | -5.8316 | 0.010575 | 0.030535 |
| novel_circ_0006422 | 0           | 5.420441698 | -5.8308 | 0.010584 | 0.030543 |
| hsa_circ_0077705   | 0           | 5.62909454  | -5.8516 | 0.010626 | 0.030605 |
| novel_circ_0005366 | 0           | 5.214697778 | -5.8091 | 0.010617 | 0.030605 |
| novel_circ_0019384 | 0           | 5.212758497 | -5.8089 | 0.01062  | 0.030605 |
| hsa_circ_0003502   | 4.771388152 | 16.39714853 | -1.7259 | 0.010667 | 0.03067  |
| novel_circ_0002881 | 0           | 5.32096348  | -5.8181 | 0.010676 | 0.03067  |
| novel_circ_0005680 | 1.690457455 | 9.416329163 | -2.3842 | 0.010694 | 0.03067  |
| novel_circ_0009151 | 0           | 5.236498392 | -5.82   | 0.010657 | 0.03067  |
| novel_circ_0009185 | 0.583292834 | 6.602266713 | -3.1532 | 0.010694 | 0.03067  |
| novel_circ_0010942 | 0           | 5.360686146 | -5.8392 | 0.010677 | 0.03067  |
| novel_circ_0014063 | 1.989015318 | 9.754987601 | -2.3461 | 0.010681 | 0.03067  |
| hsa_circ_0003679   | 6.420403211 | 0.671499034 | 3.2415  | 0.010735 | 0.030769 |
| hsa_circ_0071189   | 0.583292834 | 6.475170038 | -3.1199 | 0.010754 | 0.030804 |
| hsa_circ_0000853   | 9.03415376  | 25.53651409 | -1.4696 | 0.01077  | 0.03083  |
| novel_circ_0019046 | 2.371884324 | 15.27217015 | -2.654  | 0.010821 | 0.030958 |
| novel_circ_0012469 | 0           | 5.215667418 | -5.8025 | 0.010858 | 0.031021 |
| novel_circ_0013724 | 0           | 5.215667418 | -5.8025 | 0.010858 | 0.031021 |
| novel_circ_0016386 | 7.694763768 | 1.00724855  | 2.9469  | 0.01087  | 0.031021 |
| novel_circ_0021861 | 0           | 5.211788857 | -5.802  | 0.010865 | 0.031021 |
| hsa_circ_0081813   | 42.60679844 | 14.93287163 | 1.5065  | 0.010907 | 0.031109 |
| hsa_circ_0006956   | 27.87929277 | 71.39453398 | -1.3547 | 0.010928 | 0.03114  |
| novel_circ_0017404 | 1.148607018 | 8.134056289 | -2.7881 | 0.010931 | 0.03114  |
| hsa_circ_0006990   | 18.53130563 | 59.03233646 | -1.6309 | 0.010998 | 0.031196 |
| hsa_circ_0008073   | 0           | 5.296253945 | -5.7968 | 0.010996 | 0.031196 |
| hsa_circ_0060739   | 8.457772372 | 1.470094742 | 2.4478  | 0.010982 | 0.031196 |
| novel_circ_0000303 | 0           | 5.297223585 | -5.797  | 0.010995 | 0.031196 |
| novel_circ_0000416 | 0           | 5.296253945 | -5.7968 | 0.010996 | 0.031196 |
| novel_circ_0003493 | 0           | 5.296253945 | -5.7968 | 0.010996 | 0.031196 |
| novel_circ_0008889 | 0           | 5.297223585 | -5.797  | 0.010995 | 0.031196 |
| novel_circ_0014955 | 4.420320689 | 0           | 5.7919  | 0.011016 | 0.031228 |
| hsa_circ_0001383   | 0           | 5.237468032 | -5.809  | 0.011032 | 0.031256 |
| novel_circ_0017944 | 0           | 5.23358947  | -5.8085 | 0.011039 | 0.031256 |
| hsa_circ_0000414   | 0           | 5.295284304 | -5.7943 | 0.011095 | 0.031318 |
| hsa_circ_0007378   | 16.17051479 | 5.085661822 | 1.6721  | 0.011077 | 0.031318 |
| hsa_circ_0022306   | 4.3290981   | 0           | 5.779   | 0.011107 | 0.031318 |
| hsa_circ_0042880   | 0           | 5.192897164 | -5.7827 | 0.011115 | 0.031318 |
| hsa_circ_0064622   | 0           | 5.192897164 | -5.7827 | 0.011115 | 0.031318 |
| hsa_circ_0067479   | 0           | 5.419472058 | -5.817  | 0.011101 | 0.031318 |
| hsa_circ_0077292   | 0           | 5.295284304 | -5.7943 | 0.011095 | 0.031318 |
| novel_circ_0000727 | 0           | 5.400580365 | -5.8066 | 0.01107  | 0.031318 |
| hsa_circ_0053882   | 0           | 5.38442604  | -5.8339 | 0.011153 | 0.031388 |
| hsa_circ_0085323   | 0           | 5.38442604  | -5.8339 | 0.011153 | 0.031388 |
| novel_circ_0007914 | 0           | 5.315145637 | -5.8039 | 0.011185 | 0.03144  |
| novel_circ_0016502 | 0           | 5.315145637 | -5.8039 | 0.011185 | 0.03144  |
| hsa_circ_0004558   | 2.333171336 | 16.01488887 | -2.5756 | 0.011266 | 0.031514 |
| hsa_circ_0005612   | 0           | 5.086631462 | -5.768  | 0.011254 | 0.031514 |
| hsa_circ_0007183   | 0           | 5.506846067 | -5.814  | 0.011259 | 0.031514 |
| hsa_circ_0019006   | 0           | 5.086631462 | -5.768  | 0.011254 | 0.031514 |
| hsa_circ_0043975   | 4.304208004 | 0           | 5.7723  | 0.011272 | 0.031514 |
| novel_circ_0000755 | 0           | 5.086631462 | -5.768  | 0.011254 | 0.031514 |
| novel_circ_0004168 | 0           | 5.086631462 | -5.768  | 0.011254 | 0.031514 |
| novel_circ_0009052 | 4.304208004 | 0           | 5.7723  | 0.011272 | 0.031514 |
| novel_circ_0018284 | 0           | 5.087601103 | -5.7681 | 0.011253 | 0.031514 |
| hsa_circ_0005589   | 0           | 5.294314664 | -5.7892 | 0.011305 | 0.031551 |
| hsa_circ_0024242   | 0           | 5.294314664 | -5.7892 | 0.011305 | 0.031551 |
| hsa_circ_0081897   | 0           | 5.299162866 | -5.7899 | 0.011297 | 0.031551 |
| novel_circ_0005873 | 8.991285013 | 1.342998067 | 2.747   | 0.011319 | 0.031569 |
| novel_circ_0016603 | 0           | 5.210819216 | -5.789  | 0.011343 | 0.031619 |
| hsa_circ_0001723   | 0           | 5.088570743 | -5.7649 | 0.011387 | 0.031699 |
| hsa_circ_0049291   | 6.360982165 | 0.671499034 | 3.2146  | 0.011392 | 0.031699 |
| novel_circ_0019060 | 0           | 5.085661822 | -5.7645 | 0.011392 | 0.031699 |

|                    |             |             |         |          |          |
|--------------------|-------------|-------------|---------|----------|----------|
| hsa_circ_0008546   | 38.90100922 | 15.80623603 | 1.307   | 0.011421 | 0.031741 |
| novel_circ_0001873 | 10.55038054 | 1.15711548  | 2.9102  | 0.011416 | 0.031741 |
| hsa_circ_0027528   | 0           | 5.404458927 | -5.7984 | 0.011431 | 0.03175  |
| novel_circ_0011282 | 6.011217759 | 0.462846192 | 3.2745  | 0.01146  | 0.031812 |
| hsa_circ_0029633   | 0           | 4.982305042 | -5.7507 | 0.011509 | 0.031899 |
| hsa_circ_0032097   | 0           | 4.982305042 | -5.7507 | 0.011509 | 0.031899 |
| hsa_circ_0084642   | 0           | 5.003136015 | -5.7637 | 0.011512 | 0.031899 |
| hsa_circ_0005058   | 0           | 4.981335401 | -5.7486 | 0.01159  | 0.032021 |
| hsa_circ_0007442   | 0           | 4.983274682 | -5.7488 | 0.011587 | 0.032021 |
| hsa_circ_0039348   | 0           | 4.983274682 | -5.7488 | 0.011587 | 0.032021 |
| hsa_circ_0071234   | 1.223277306 | 8.030699509 | -2.7498 | 0.011587 | 0.032021 |
| novel_circ_0000124 | 0           | 4.983274682 | -5.7488 | 0.011587 | 0.032021 |
| hsa_circ_0007251   | 0           | 5.194836445 | -5.7707 | 0.011614 | 0.03205  |
| hsa_circ_0060527   | 0           | 5.194836445 | -5.7707 | 0.011614 | 0.03205  |
| hsa_circ_0012618   | 20.65716797 | 4.746033744 | 2.088   | 0.01164  | 0.032101 |
| hsa_circ_0058728   | 4.262765607 | 0           | 5.7565  | 0.011681 | 0.032195 |
| novel_circ_0013163 | 29.54628648 | 10.42357771 | 1.4803  | 0.011725 | 0.032297 |
| hsa_circ_0049540   | 1.223277306 | 8.578980429 | -2.8226 | 0.011734 | 0.032304 |
| novel_circ_0013863 | 12.5380928  | 33.03250765 | -1.389  | 0.011749 | 0.032325 |
| novel_circ_0018679 | 0           | 5.502967506 | -5.8016 | 0.011761 | 0.032338 |
| hsa_circ_0002416   | 0           | 4.984244322 | -5.7425 | 0.011844 | 0.032453 |
| hsa_circ_0016040   | 4.188095318 | 0           | 5.7447  | 0.011845 | 0.032453 |
| hsa_circ_0065623   | 4.188095318 | 0           | 5.7447  | 0.011845 | 0.032453 |
| novel_circ_0006163 | 0           | 4.984244322 | -5.7425 | 0.011844 | 0.032453 |
| novel_circ_0010801 | 0           | 4.980365761 | -5.7419 | 0.011851 | 0.032453 |
| novel_circ_0011717 | 4.188095318 | 0           | 5.7447  | 0.011845 | 0.032453 |
| novel_circ_0013764 | 0           | 4.980365761 | -5.7419 | 0.011851 | 0.032453 |
| hsa_circ_0071122   | 0           | 5.006044936 | -5.7532 | 0.011907 | 0.032473 |
| hsa_circ_0088048   | 0           | 4.87700898  | -5.7299 | 0.011905 | 0.032473 |
| hsa_circ_0091570   | 4.121762826 | 0           | 5.7353  | 0.011909 | 0.032473 |
| novel_circ_0003570 | 0           | 5.002166375 | -5.7526 | 0.011914 | 0.032473 |
| novel_circ_0006159 | 0           | 4.877978621 | -5.73   | 0.011903 | 0.032473 |
| novel_circ_0006316 | 11.2815876  | 2.060037609 | 2.3073  | 0.011905 | 0.032473 |
| novel_circ_0010861 | 0           | 5.002166375 | -5.7526 | 0.011914 | 0.032473 |
| novel_circ_0013948 | 4.121762826 | 0           | 5.7353  | 0.011909 | 0.032473 |
| novel_circ_0018569 | 7.828855103 | 1.00724855  | 2.9663  | 0.011942 | 0.03253  |
| hsa_circ_0007168   | 1.631036409 | 11.17663291 | -2.7758 | 0.011994 | 0.032652 |
| hsa_circ_0000349   | 0           | 4.898809594 | -5.7393 | 0.012028 | 0.032727 |
| hsa_circ_0020340   | 16.9722101  | 2.314230959 | 2.6759  | 0.012035 | 0.032727 |
| hsa_circ_0055906   | 5.045055919 | 18.49708036 | -1.8454 | 0.012064 | 0.032785 |
| hsa_circ_0001148   | 1.80657014  | 9.269371155 | -2.316  | 0.012099 | 0.032803 |
| hsa_circ_0003761   | 0           | 4.87603934  | -5.7245 | 0.012112 | 0.032803 |
| hsa_circ_0077296   | 0           | 4.878948261 | -5.7249 | 0.012107 | 0.032803 |
| novel_circ_0001028 | 0           | 4.87603934  | -5.7245 | 0.012112 | 0.032803 |
| novel_circ_0002247 | 6.402424561 | 0.694269288 | 2.8481  | 0.012093 | 0.032803 |
| novel_circ_0013334 | 0           | 4.87603934  | -5.7245 | 0.012112 | 0.032803 |
| novel_circ_0021685 | 1.223277306 | 8.431850867 | -2.8242 | 0.012154 | 0.032897 |
| hsa_circ_0076178   | 4.09687273  | 0           | 5.7262  | 0.012163 | 0.032902 |
| hsa_circ_0007335   | 2.315192685 | 10.76320579 | -2.1157 | 0.012255 | 0.033132 |
| novel_circ_0005567 | 0           | 4.960504428 | -5.7183 | 0.012265 | 0.03314  |
| hsa_circ_0004092   | 0           | 5.064830849 | -5.7299 | 0.012287 | 0.033143 |
| hsa_circ_0008278   | 0           | 5.064830849 | -5.7299 | 0.012287 | 0.033143 |
| novel_circ_0005131 | 0           | 5.064830849 | -5.7299 | 0.012287 | 0.033143 |
| hsa_circ_0000235   | 0           | 4.900748875 | -5.7307 | 0.012353 | 0.033177 |
| hsa_circ_0003572   | 1.458232085 | 10.48721183 | -2.5916 | 0.012363 | 0.033177 |
| hsa_circ_0004556   | 0           | 4.900748875 | -5.7307 | 0.012353 | 0.033177 |
| hsa_circ_0027836   | 0           | 4.961474068 | -5.7171 | 0.012324 | 0.033177 |
| hsa_circ_0066273   | 0           | 4.897839954 | -5.7303 | 0.012359 | 0.033177 |
| novel_circ_0006566 | 0           | 4.772682559 | -5.7075 | 0.012364 | 0.033177 |
| novel_circ_0007662 | 0           | 4.772682559 | -5.7075 | 0.012364 | 0.033177 |
| novel_circ_0020700 | 0           | 4.772682559 | -5.7075 | 0.012364 | 0.033177 |
| novel_circ_0020947 | 0           | 4.772682559 | -5.7075 | 0.012364 | 0.033177 |
| hsa_circ_0001647   | 0           | 4.856178007 | -5.7032 | 0.012412 | 0.033234 |
| hsa_circ_0004977   | 0           | 4.855208367 | -5.703  | 0.012414 | 0.033234 |
| novel_circ_0010903 | 14.52983753 | 3.023684932 | 2.2856  | 0.012409 | 0.033234 |

|                    |             |             |         |          |          |
|--------------------|-------------|-------------|---------|----------|----------|
| novel_circ_0020728 | 0           | 4.855208367 | -5.703  | 0.012414 | 0.033234 |
| hsa_circ_0002231   | 0           | 4.7736522   | -5.7044 | 0.012489 | 0.033369 |
| hsa_circ_0007123   | 0           | 4.962443709 | -5.713  | 0.012513 | 0.033369 |
| hsa_circ_0007698   | 0.874939251 | 7.252934773 | -2.7494 | 0.012504 | 0.033369 |
| hsa_circ_0056590   | 0           | 4.958565147 | -5.7124 | 0.012521 | 0.033369 |
| novel_circ_0004837 | 0           | 4.958565147 | -5.7124 | 0.012521 | 0.033369 |
| novel_circ_0005560 | 0           | 4.771712919 | -5.7041 | 0.012493 | 0.033369 |
| novel_circ_0011347 | 10.58087903 | 2.606379249 | 1.9656  | 0.012504 | 0.033369 |
| novel_circ_0015477 | 0.874939251 | 7.674119018 | -2.8135 | 0.012515 | 0.033369 |
| hsa_circ_0044698   | 0           | 4.857147647 | -5.7001 | 0.012555 | 0.03344  |
| hsa_circ_0032116   | 0           | 4.879917902 | -5.7132 | 0.012578 | 0.033462 |
| novel_circ_0008767 | 0           | 4.879917902 | -5.7132 | 0.012578 | 0.033462 |
| hsa_circ_0001955   | 0           | 4.750881946 | -5.6863 | 0.012642 | 0.033504 |
| hsa_circ_0004773   | 1.166585668 | 10.15323004 | -2.864  | 0.01265  | 0.033504 |
| hsa_circ_0005342   | 0           | 5.06773977  | -5.7231 | 0.012617 | 0.033504 |
| hsa_circ_0006126   | 0           | 4.750881946 | -5.6863 | 0.012642 | 0.033504 |
| hsa_circ_0007493   | 93.78315033 | 39.72649546 | 1.2359  | 0.012618 | 0.033504 |
| novel_circ_0006335 | 4.030540237 | 0           | 5.706   | 0.012651 | 0.033504 |
| novel_circ_0006778 | 0           | 4.750881946 | -5.6863 | 0.012642 | 0.033504 |
| novel_circ_0016581 | 4.030540237 | 0           | 5.706   | 0.012651 | 0.033504 |
| hsa_circ_0002901   | 0           | 4.749912305 | -5.6842 | 0.01273  | 0.033694 |
| hsa_circ_0006805   | 0           | 4.920610208 | -5.7299 | 0.012767 | 0.033773 |
| hsa_circ_0004271   | 13.87057135 | 3.743633395 | 1.8479  | 0.012802 | 0.033847 |
| hsa_circ_0000703   | 1.458232085 | 10.38676397 | -2.5799 | 0.012815 | 0.033861 |
| hsa_circ_0003131   | 0           | 4.858117288 | -5.6931 | 0.012873 | 0.033968 |
| hsa_circ_0004407   | 2.333171336 | 15.60340103 | -2.5421 | 0.012884 | 0.033968 |
| novel_circ_0016062 | 0           | 4.963413349 | -5.7054 | 0.012865 | 0.033968 |
| novel_circ_0018029 | 0           | 4.853269086 | -5.6923 | 0.012883 | 0.033968 |
| hsa_circ_0004700   | 0           | 4.77462184  | -5.6938 | 0.012912 | 0.034002 |
| novel_circ_0002430 | 34.04661299 | 6.99195394  | 2.2414  | 0.012908 | 0.034002 |
| hsa_circ_0002835   | 0           | 4.795452814 | -5.7049 | 0.012935 | 0.034025 |
| novel_circ_0018245 | 0.815518204 | 6.814798116 | -3.0731 | 0.012935 | 0.034025 |
| hsa_circ_0000417   | 3.903360348 | 16.98321284 | -2.1297 | 0.012946 | 0.034035 |
| hsa_circ_0002513   | 44.08158283 | 18.71234913 | 1.2278  | 0.01297  | 0.034035 |
| hsa_circ_0003748   | 0           | 4.667386498 | -5.68   | 0.013025 | 0.034035 |
| hsa_circ_0003873   | 0           | 4.645585884 | -5.6659 | 0.013022 | 0.034035 |
| hsa_circ_0007997   | 0           | 4.752821226 | -5.6783 | 0.013    | 0.034035 |
| hsa_circ_0064460   | 21.89151248 | 7.672179738 | 1.5292  | 0.013026 | 0.034035 |
| hsa_circ_0076402   | 4.128674272 | 0           | 5.6908  | 0.012986 | 0.034035 |
| novel_circ_0009780 | 0           | 4.645585884 | -5.6659 | 0.013022 | 0.034035 |
| novel_circ_0015262 | 4.062341779 | 0           | 5.6819  | 0.012986 | 0.034035 |
| novel_circ_0018607 | 0           | 4.668356139 | -5.6801 | 0.013023 | 0.034035 |
| novel_circ_0019826 | 0           | 4.752821226 | -5.6783 | 0.013    | 0.034035 |
| novel_circ_0022043 | 0           | 4.752821226 | -5.6783 | 0.013    | 0.034035 |
| hsa_circ_0001701   | 19.08006751 | 5.189018603 | 1.8824  | 0.013133 | 0.034205 |
| hsa_circ_0004015   | 1.148607018 | 7.904572474 | -2.7428 | 0.013119 | 0.034205 |
| hsa_circ_0015455   | 13.8193648  | 3.845050895 | 1.8164  | 0.013135 | 0.034205 |
| novel_circ_0003434 | 4.012561587 | 0           | 5.6735  | 0.013116 | 0.034205 |
| novel_circ_0013865 | 2.297214035 | 14.48988678 | -2.6125 | 0.013135 | 0.034205 |
| novel_circ_0022275 | 12.88773391 | 3.614597439 | 1.8227  | 0.013116 | 0.034205 |
| hsa_circ_0037052   | 3.921338998 | 0           | 5.6593  | 0.013246 | 0.034457 |
| novel_circ_0003647 | 0           | 4.647525165 | -5.6611 | 0.013247 | 0.034457 |
| hsa_circ_0002972   | 22.5549607  | 5.154942225 | 2.0388  | 0.013269 | 0.034494 |
| novel_circ_0018378 | 15.46980621 | 3.194382835 | 2.1766  | 0.01331  | 0.034582 |
| novel_circ_0004269 | 0           | 4.669325779 | -5.6715 | 0.013371 | 0.034649 |
| novel_circ_0004449 | 9.332711623 | 1.932940934 | 2.17    | 0.013373 | 0.034649 |
| novel_circ_0011955 | 4.146652922 | 15.00570104 | -1.8004 | 0.013366 | 0.034649 |
| novel_circ_0019984 | 0           | 4.669325779 | -5.6715 | 0.013371 | 0.034649 |
| novel_circ_0022217 | 0           | 4.669325779 | -5.6715 | 0.013371 | 0.034649 |
| hsa_circ_0000412   | 130.1367678 | 63.00207622 | 1.0457  | 0.013434 | 0.03477  |
| hsa_circ_0001017   | 292.8414287 | 654.7951056 | -1.1532 | 0.013451 | 0.03477  |
| hsa_circ_0001736   | 0           | 4.852299445 | -5.6795 | 0.013457 | 0.03477  |
| hsa_circ_0032849   | 3.97111919  | 0           | 5.6601  | 0.013457 | 0.03477  |
| hsa_circ_0073177   | 0           | 4.859086928 | -5.6806 | 0.013441 | 0.03477  |
| hsa_circ_0007365   | 0           | 4.541259464 | -5.6438 | 0.013467 | 0.034776 |

|                    |             |             |         |          |          |
|--------------------|-------------|-------------|---------|----------|----------|
| hsa_circ_0005952   | 1.148607018 | 7.58868429  | -2.7011 | 0.013529 | 0.034919 |
| hsa_circ_0004495   | 0           | 4.753790867 | -5.6663 | 0.01354  | 0.034928 |
| novel_circ_0015126 | 1.914345029 | 11.22799126 | -2.5304 | 0.013564 | 0.034969 |
| hsa_circ_0035185   | 0           | 4.540289823 | -5.6405 | 0.01361  | 0.035051 |
| novel_circ_0003022 | 0           | 4.540289823 | -5.6405 | 0.01361  | 0.035051 |
| novel_circ_0012369 | 3.98767149  | 0           | 5.6594  | 0.013627 | 0.035075 |
| novel_circ_0016790 | 3.830116409 | 0           | 5.6392  | 0.013651 | 0.035098 |
| novel_circ_0020281 | 3.830116409 | 0           | 5.6392  | 0.013651 | 0.035098 |
| hsa_circ_0000619   | 25.44929046 | 8.640503709 | 1.5148  | 0.013785 | 0.035268 |
| hsa_circ_0001431   | 0           | 4.648494806 | -5.6497 | 0.01375  | 0.035268 |
| hsa_circ_0047348   | 0           | 4.624754911 | -5.6335 | 0.013783 | 0.035268 |
| hsa_circ_0068013   | 0           | 4.623785271 | -5.6333 | 0.013785 | 0.035268 |
| novel_circ_0004242 | 0           | 4.643646604 | -5.6489 | 0.013761 | 0.035268 |
| novel_circ_0005028 | 0           | 4.623785271 | -5.6333 | 0.013785 | 0.035268 |
| novel_circ_0009989 | 0           | 4.563060077 | -5.6507 | 0.013768 | 0.035268 |
| novel_circ_0016851 | 0           | 4.689187112 | -5.6738 | 0.013727 | 0.035268 |
| novel_circ_0020914 | 0           | 4.648494806 | -5.6497 | 0.01375  | 0.035268 |
| hsa_circ_0008823   | 19.06066251 | 5.547538374 | 1.7634  | 0.01382  | 0.035317 |
| hsa_circ_0075854   | 0           | 4.728111691 | -5.646  | 0.013816 | 0.035317 |
| hsa_circ_0000847   | 11.43092818 | 29.70327101 | -1.3641 | 0.013892 | 0.035483 |
| novel_circ_0004470 | 0           | 4.834377393 | -5.6567 | 0.01394  | 0.035585 |
| hsa_circ_0017306   | 0           | 4.564029718 | -5.6455 | 0.013985 | 0.035662 |
| hsa_circ_0060735   | 0           | 4.564029718 | -5.6455 | 0.013985 | 0.035662 |
| novel_circ_0006417 | 0.583292834 | 6.554786924 | -3.1169 | 0.014    | 0.035681 |
| hsa_circ_0007779   | 0           | 4.52042849  | -5.6154 | 0.014025 | 0.035684 |
| hsa_circ_0030632   | 0           | 4.727142051 | -5.6417 | 0.014024 | 0.035684 |
| novel_circ_0019769 | 0           | 4.52042849  | -5.6154 | 0.014025 | 0.035684 |
| hsa_circ_0058495   | 220.8159017 | 100.0239673 | 1.1318  | 0.014053 | 0.035738 |
| novel_circ_0003932 | 0           | 4.539320183 | -5.63   | 0.014087 | 0.035785 |
| novel_circ_0016104 | 0           | 4.539320183 | -5.63   | 0.014087 | 0.035785 |
| hsa_circ_0016867   | 1.166585668 | 8.365479385 | -2.568  | 0.014118 | 0.035844 |
| hsa_circ_0012720   | 0           | 4.435963402 | -5.6166 | 0.014139 | 0.035858 |
| hsa_circ_0088744   | 7.211031319 | 1.010157472 | 2.8471  | 0.014139 | 0.035858 |
| hsa_circ_0003936   | 0           | 4.414162788 | -5.5972 | 0.014273 | 0.03606  |
| hsa_circ_0042881   | 0           | 4.415132429 | -5.5973 | 0.014271 | 0.03606  |
| novel_circ_0008086 | 0           | 4.415132429 | -5.5973 | 0.014271 | 0.03606  |
| novel_circ_0011786 | 0           | 4.414162788 | -5.5972 | 0.014273 | 0.03606  |
| novel_circ_0012278 | 0           | 4.415132429 | -5.5973 | 0.014271 | 0.03606  |
| novel_circ_0013305 | 0           | 4.415132429 | -5.5973 | 0.014271 | 0.03606  |
| novel_circ_0019998 | 0           | 4.415132429 | -5.5973 | 0.014271 | 0.03606  |
| novel_circ_0015995 | 0           | 4.626694192 | -5.6237 | 0.014305 | 0.036122 |
| hsa_circ_0001944   | 0           | 4.521398131 | -5.6095 | 0.014338 | 0.036126 |
| hsa_circ_0002687   | 0           | 4.62184599  | -5.6229 | 0.014317 | 0.036126 |
| novel_circ_0004482 | 0           | 4.521398131 | -5.6095 | 0.014338 | 0.036126 |
| novel_circ_0018886 | 0           | 4.521398131 | -5.6095 | 0.014338 | 0.036126 |
| novel_circ_0008781 | 0           | 4.517519569 | -5.6089 | 0.014346 | 0.036129 |
| novel_circ_0005279 | 3.73889382  | 0           | 5.6108  | 0.01442  | 0.036294 |
| novel_circ_0006018 | 13.76828155 | 36.69167595 | -1.4201 | 0.014447 | 0.036343 |
| hsa_circ_0006535   | 11.89537892 | 2.500113547 | 2.1538  | 0.014532 | 0.036404 |
| hsa_circ_0008126   | 0           | 4.416102069 | -5.5926 | 0.014516 | 0.036404 |
| hsa_circ_0008406   | 0           | 4.416102069 | -5.5926 | 0.014516 | 0.036404 |
| hsa_circ_0040528   | 10.58909353 | 1.830553794 | 2.3798  | 0.014492 | 0.036404 |
| hsa_circ_0085321   | 0           | 4.434993762 | -5.6079 | 0.014533 | 0.036404 |
| novel_circ_0003333 | 0           | 4.416102069 | -5.5926 | 0.014516 | 0.036404 |
| novel_circ_0004708 | 0           | 4.413193148 | -5.5921 | 0.014522 | 0.036404 |
| novel_circ_0020671 | 0           | 4.437902683 | -5.6083 | 0.014527 | 0.036404 |
| novel_circ_0010675 | 1.749878502 | 10.97282827 | -2.4227 | 0.01465  | 0.036676 |
| novel_circ_0021679 | 0           | 4.309836368 | -5.5755 | 0.014707 | 0.036798 |
| hsa_circ_0004705   | 8.999622809 | 2.143533057 | 2.0578  | 0.014775 | 0.036938 |
| hsa_circ_0004849   | 20.0255213  | 52.16552636 | -1.3696 | 0.014779 | 0.036938 |
| novel_circ_0014552 | 0           | 4.457764016 | -5.6143 | 0.014819 | 0.03702  |
| novel_circ_0010292 | 0           | 4.310806008 | -5.5726 | 0.014856 | 0.037083 |
| novel_circ_0021658 | 0           | 4.308866727 | -5.5723 | 0.01486  | 0.037083 |
| hsa_circ_0003118   | 0           | 4.331636981 | -5.5875 | 0.014905 | 0.037175 |
| hsa_circ_0085362   | 0           | 4.627663832 | -5.6115 | 0.01492  | 0.037194 |

|                    |             |             |         |          |          |
|--------------------|-------------|-------------|---------|----------|----------|
| hsa_circ_0068360   | 0           | 4.620876349 | -5.6104 | 0.014939 | 0.037221 |
| hsa_circ_0002081   | 0           | 4.522367771 | -5.5979 | 0.014953 | 0.037234 |
| hsa_circ_0072973   | 12.78268843 | 2.014497101 | 2.6514  | 0.015016 | 0.037351 |
| novel_circ_0012800 | 5.93797382  | 19.38675709 | -1.6456 | 0.01501  | 0.037351 |
| hsa_circ_0001236   | 5.228927447 | 0.462846192 | 3.0862  | 0.015041 | 0.037395 |
| hsa_circ_0007695   | 0           | 4.41707171  | -5.5816 | 0.015084 | 0.037482 |
| hsa_circ_0001961   | 0           | 4.332606622 | -5.5822 | 0.015156 | 0.03762  |
| novel_circ_0004751 | 0           | 4.332606622 | -5.5822 | 0.015156 | 0.03762  |
| hsa_circ_0002359   | 14.60162884 | 68.64360453 | -2.1651 | 0.015233 | 0.037791 |
| hsa_circ_0004820   | 33.95408734 | 12.4162742  | 1.4501  | 0.0153   | 0.037937 |
| hsa_circ_0003030   | 0           | 4.205509947 | -5.5489 | 0.015389 | 0.038043 |
| hsa_circ_0007995   | 0           | 4.311775648 | -5.5627 | 0.015363 | 0.038043 |
| hsa_circ_0056040   | 0           | 4.204540306 | -5.5487 | 0.015391 | 0.038043 |
| hsa_circ_0082988   | 0           | 4.204540306 | -5.5487 | 0.015391 | 0.038043 |
| novel_circ_0010709 | 0           | 4.307897087 | -5.562  | 0.015372 | 0.038043 |
| novel_circ_0019181 | 0           | 4.311775648 | -5.5627 | 0.015363 | 0.038043 |
| hsa_circ_0001974   | 3.770695362 | 0           | 5.5725  | 0.015407 | 0.038062 |
| hsa_circ_0002039   | 0           | 4.393331815 | -5.5579 | 0.015438 | 0.038063 |
| novel_circ_0004808 | 2.779643426 | 11.54097053 | -2.0928 | 0.015434 | 0.038063 |
| novel_circ_0012816 | 0           | 4.392362175 | -5.5577 | 0.015441 | 0.038063 |
| novel_circ_0020548 | 0           | 4.392362175 | -5.5577 | 0.015441 | 0.038063 |
| hsa_circ_0015365   | 0.815518204 | 6.116650267 | -2.9303 | 0.015458 | 0.038065 |
| novel_circ_0015633 | 3.654582677 | 0           | 5.556   | 0.01545  | 0.038065 |
| hsa_circ_0007081   | 3.570271534 | 16.5109998  | -2.2242 | 0.015475 | 0.038089 |
| hsa_circ_0008380   | 5.411372625 | 0.671499034 | 3.0012  | 0.015492 | 0.03811  |
| hsa_circ_0000944   | 21.57497597 | 7.339339142 | 1.566   | 0.015504 | 0.038118 |
| hsa_circ_0002468   | 0           | 4.287066113 | -5.5406 | 0.015588 | 0.038204 |
| hsa_circ_0005044   | 1.223277306 | 8.540055849 | -2.8209 | 0.015574 | 0.038204 |
| hsa_circ_0017850   | 0           | 4.287066113 | -5.5406 | 0.015588 | 0.038204 |
| hsa_circ_0060530   | 0           | 4.287066113 | -5.5406 | 0.015588 | 0.038204 |
| novel_circ_0012341 | 0           | 4.289005394 | -5.5409 | 0.015583 | 0.038204 |
| novel_circ_0019395 | 0           | 4.289005394 | -5.5409 | 0.015583 | 0.038204 |
| novel_circ_0017949 | 2.346994228 | 14.09211286 | -2.5522 | 0.015734 | 0.038542 |
| novel_circ_0019366 | 0           | 4.182739693 | -5.5232 | 0.015772 | 0.038615 |
| hsa_circ_0001513   | 0           | 4.206479587 | -5.5406 | 0.015805 | 0.038616 |
| hsa_circ_0018761   | 0           | 4.206479587 | -5.5406 | 0.015805 | 0.038616 |
| hsa_circ_0072700   | 0           | 4.206479587 | -5.5406 | 0.015805 | 0.038616 |
| novel_circ_0005014 | 0           | 4.206479587 | -5.5406 | 0.015805 | 0.038616 |
| hsa_circ_0014878   | 3.795585459 | 0           | 5.5681  | 0.015821 | 0.038635 |
| hsa_circ_0007440   | 26.53441769 | 9.774848934 | 1.4064  | 0.015836 | 0.03865  |
| hsa_circ_0012828   | 0.765738012 | 6.012323846 | -2.9299 | 0.01588  | 0.038737 |
| hsa_circ_0057980   | 0           | 4.286096473 | -5.5345 | 0.015932 | 0.038844 |
| hsa_circ_0001564   | 2.857043123 | 12.82518268 | -2.0521 | 0.01599  | 0.038908 |
| hsa_circ_0012545   | 0           | 4.184678973 | -5.5188 | 0.016034 | 0.038908 |
| hsa_circ_0029909   | 0           | 4.395271096 | -5.5483 | 0.01602  | 0.038908 |
| hsa_circ_0035572   | 0           | 4.181770052 | -5.5183 | 0.016042 | 0.038908 |
| hsa_circ_0078162   | 0           | 4.22731056  | -5.5512 | 0.01602  | 0.038908 |
| novel_circ_0002269 | 0           | 4.390422894 | -5.5475 | 0.016033 | 0.038908 |
| novel_circ_0002890 | 0           | 4.22731056  | -5.5512 | 0.01602  | 0.038908 |
| novel_circ_0003848 | 0           | 4.184678973 | -5.5188 | 0.016034 | 0.038908 |
| novel_circ_0004120 | 0           | 4.184678973 | -5.5188 | 0.016034 | 0.038908 |
| novel_circ_0011518 | 0           | 4.181770052 | -5.5183 | 0.016042 | 0.038908 |
| hsa_circ_0006810   | 9.549687751 | 2.375925793 | 1.9812  | 0.016087 | 0.038998 |
| hsa_circ_0000115   | 0           | 4.100213885 | -5.5198 | 0.016183 | 0.03909  |
| hsa_circ_0006747   | 0           | 4.078413272 | -5.5021 | 0.016181 | 0.03909  |
| hsa_circ_0038241   | 0           | 4.100213885 | -5.5198 | 0.016183 | 0.03909  |
| hsa_circ_0052508   | 1.166585668 | 8.78569399  | -2.6298 | 0.016156 | 0.03909  |
| novel_circ_0002876 | 0           | 4.078413272 | -5.5021 | 0.016181 | 0.03909  |
| novel_circ_0007333 | 0           | 4.100213885 | -5.5198 | 0.016183 | 0.03909  |
| novel_circ_0018396 | 0           | 4.078413272 | -5.5021 | 0.016181 | 0.03909  |
| hsa_circ_0010539   | 2.333171336 | 14.0202531  | -2.391  | 0.016235 | 0.039194 |
| hsa_circ_0006140   | 0           | 4.077443631 | -5.4989 | 0.016346 | 0.039381 |
| hsa_circ_0024323   | 0           | 4.077443631 | -5.4989 | 0.016346 | 0.039381 |
| novel_circ_0005120 | 0           | 4.077443631 | -5.4989 | 0.016346 | 0.039381 |
| novel_circ_0007778 | 0           | 4.079382912 | -5.4993 | 0.016341 | 0.039381 |

|                    |             |             |         |          |          |
|--------------------|-------------|-------------|---------|----------|----------|
| hsa_circ_0006434   | 0           | 4.099244245 | -5.5142 | 0.016457 | 0.039547 |
| hsa_circ_0009137   | 0           | 4.101183526 | -5.5146 | 0.016452 | 0.039547 |
| hsa_circ_0053860   | 0           | 4.099244245 | -5.5142 | 0.016457 | 0.039547 |
| hsa_circ_0077276   | 0           | 4.101183526 | -5.5146 | 0.016452 | 0.039547 |
| novel_circ_0011107 | 0           | 4.101183526 | -5.5146 | 0.016452 | 0.039547 |
| hsa_circ_0004663   | 1.148607018 | 7.464496536 | -2.6661 | 0.016537 | 0.039717 |
| hsa_circ_0000603   | 0           | 4.285126833 | -5.5229 | 0.016603 | 0.039814 |
| hsa_circ_0009098   | 3.447247403 | 0           | 5.5057  | 0.016653 | 0.039814 |
| hsa_circ_0029787   | 5.404461179 | 0.671499034 | 3.0159  | 0.016649 | 0.039814 |
| hsa_circ_0082401   | 0           | 4.180800412 | -5.5073 | 0.016662 | 0.039814 |
| hsa_circ_0084083   | 5.369930229 | 0.462846192 | 3.1117  | 0.016645 | 0.039814 |
| novel_circ_0007661 | 0           | 4.290944675 | -5.524  | 0.016586 | 0.039814 |
| novel_circ_0011929 | 3.447247403 | 0           | 5.5057  | 0.016653 | 0.039814 |
| novel_circ_0017865 | 0           | 4.180800412 | -5.5073 | 0.016662 | 0.039814 |
| novel_circ_0018291 | 3.447247403 | 0           | 5.5057  | 0.016653 | 0.039814 |
| novel_circ_0020178 | 3.447247403 | 0           | 5.5057  | 0.016653 | 0.039814 |
| hsa_circ_0005050   | 0           | 3.974086851 | -5.4758 | 0.016868 | 0.04023  |
| hsa_circ_0029638   | 0           | 3.974086851 | -5.4758 | 0.016868 | 0.04023  |
| hsa_circ_0075402   | 0           | 3.97311721  | -5.4757 | 0.016871 | 0.04023  |
| novel_circ_0004300 | 0           | 3.97311721  | -5.4757 | 0.016871 | 0.04023  |
| hsa_circ_0009084   | 32.79165743 | 12.95130972 | 1.3218  | 0.016886 | 0.040246 |
| hsa_circ_0002626   | 0.765738012 | 6.096788934 | -2.9243 | 0.016997 | 0.040489 |
| hsa_circ_0008608   | 25.67460439 | 5.954507574 | 2.0225  | 0.017024 | 0.040534 |
| hsa_circ_0002015   | 42.75198326 | 16.97933428 | 1.3197  | 0.017066 | 0.040598 |
| hsa_circ_0030585   | 1.93232368  | 9.313942023 | -2.1458 | 0.017069 | 0.040598 |
| hsa_circ_0001400   | 29.9318849  | 7.39601422  | 1.9597  | 0.017079 | 0.040602 |
| hsa_circ_0061509   | 0           | 4.493779674 | -5.5432 | 0.017098 | 0.040604 |
| novel_circ_0011234 | 6.103866698 | 0.694269288 | 2.8013  | 0.017094 | 0.040604 |
| novel_circ_0018613 | 0.765738012 | 6.428659889 | -2.9873 | 0.017241 | 0.040923 |
| hsa_circ_0000365   | 6.539245304 | 0.673438314 | 3.2398  | 0.017266 | 0.04093  |
| hsa_circ_0008520   | 0           | 4.122014499 | -5.5125 | 0.017278 | 0.04093  |
| novel_circ_0000176 | 0           | 4.122014499 | -5.5125 | 0.017278 | 0.04093  |
| novel_circ_0005013 | 0           | 4.122014499 | -5.5125 | 0.017278 | 0.04093  |
| hsa_circ_0002004   | 0           | 3.975056491 | -5.4678 | 0.017314 | 0.040952 |
| hsa_circ_0044793   | 0           | 3.975056491 | -5.4678 | 0.017314 | 0.040952 |
| novel_circ_0009843 | 0           | 3.97214757  | -5.4673 | 0.017323 | 0.040952 |
| novel_circ_0016860 | 0           | 3.97214757  | -5.4673 | 0.017323 | 0.040952 |
| novel_circ_0016838 | 0           | 4.056612658 | -5.4616 | 0.01741  | 0.041138 |
| hsa_circ_0000130   | 0           | 4.055643017 | -5.4596 | 0.01753  | 0.041254 |
| hsa_circ_0003399   | 0           | 4.055643017 | -5.4596 | 0.01753  | 0.041254 |
| hsa_circ_0005419   | 0           | 4.055643017 | -5.4596 | 0.01753  | 0.041254 |
| hsa_circ_0006768   | 0           | 4.057582298 | -5.46   | 0.017524 | 0.041254 |
| novel_circ_0004738 | 0           | 4.055643017 | -5.4596 | 0.01753  | 0.041254 |
| novel_circ_0007639 | 0           | 4.055643017 | -5.4596 | 0.01753  | 0.041254 |
| novel_circ_0013372 | 0           | 4.055643017 | -5.4596 | 0.01753  | 0.041254 |
| novel_circ_0018086 | 0           | 4.057582298 | -5.46   | 0.017524 | 0.041254 |
| hsa_circ_0078198   | 0           | 4.161908719 | -5.4748 | 0.017584 | 0.041327 |
| novel_circ_0002159 | 0           | 4.160939079 | -5.4746 | 0.017588 | 0.041327 |
| novel_circ_0014433 | 0           | 4.161908719 | -5.4748 | 0.017584 | 0.041327 |
| hsa_circ_0002153   | 0           | 3.952286237 | -5.4434 | 0.0176   | 0.041334 |
| hsa_circ_0007271   | 0           | 3.868790789 | -5.4471 | 0.017685 | 0.041514 |
| novel_circ_0017690 | 3.331134718 | 0           | 5.4698  | 0.017735 | 0.04161  |
| hsa_circ_0008131   | 12.87951941 | 2.9668383   | 2.0225  | 0.017759 | 0.041645 |
| hsa_circ_0004836   | 0           | 4.159969438 | -5.4713 | 0.017795 | 0.04171  |
| hsa_circ_0001337   | 0           | 4.058551939 | -5.4544 | 0.017896 | 0.041786 |
| hsa_circ_0001826   | 0           | 3.953255877 | -5.439  | 0.017887 | 0.041786 |
| hsa_circ_0043893   | 11.06876723 | 1.678747584 | 2.7056  | 0.017839 | 0.041786 |
| hsa_circ_0054960   | 0           | 4.054673377 | -5.4537 | 0.017908 | 0.041786 |
| hsa_circ_0060665   | 0           | 3.953255877 | -5.439  | 0.017887 | 0.041786 |
| hsa_circ_0067773   | 0           | 3.953255877 | -5.439  | 0.017887 | 0.041786 |
| novel_circ_0009921 | 0           | 3.953255877 | -5.439  | 0.017887 | 0.041786 |
| novel_circ_0016013 | 0           | 3.950346956 | -5.4384 | 0.017897 | 0.041786 |
| novel_circ_0019047 | 0           | 4.054673377 | -5.4537 | 0.017908 | 0.041786 |
| hsa_circ_0007473   | 0           | 3.846990176 | -5.4226 | 0.01796  | 0.041823 |
| hsa_circ_0008478   | 0           | 3.846990176 | -5.4226 | 0.01796  | 0.041823 |

|                    |             |             |         |          |          |
|--------------------|-------------|-------------|---------|----------|----------|
| hsa_circ_0038705   | 0           | 3.846990176 | -5.4226 | 0.01796  | 0.041823 |
| novel_circ_0007776 | 0           | 3.846990176 | -5.4226 | 0.01796  | 0.041823 |
| novel_circ_0000979 | 0           | 3.867821149 | -5.4416 | 0.017979 | 0.041846 |
| hsa_circ_0001483   | 0           | 3.846020535 | -5.4196 | 0.018139 | 0.04201  |
| hsa_circ_0001993   | 0           | 3.847959816 | -5.4199 | 0.018133 | 0.04201  |
| hsa_circ_0003991   | 0           | 3.846020535 | -5.4196 | 0.018139 | 0.04201  |
| hsa_circ_0004243   | 2.446554613 | 15.62793901 | -2.6554 | 0.018062 | 0.04201  |
| hsa_circ_0004768   | 0           | 3.846020535 | -5.4196 | 0.018139 | 0.04201  |
| hsa_circ_0005493   | 0           | 3.846020535 | -5.4196 | 0.018139 | 0.04201  |
| hsa_circ_0037000   | 0.583292834 | 6.197236793 | -3.0277 | 0.018113 | 0.04201  |
| hsa_circ_0052867   | 0           | 3.847959816 | -5.4199 | 0.018133 | 0.04201  |
| novel_circ_0015368 | 0           | 3.847959816 | -5.4199 | 0.018133 | 0.04201  |
| novel_circ_0019797 | 0           | 3.847959816 | -5.4199 | 0.018133 | 0.04201  |
| hsa_circ_0087264   | 20.81890509 | 51.14795488 | -1.3017 | 0.018218 | 0.042172 |
| novel_circ_0016018 | 0           | 4.158999798 | -5.4644 | 0.018247 | 0.042218 |
| hsa_circ_0002847   | 19.85689901 | 44.72575291 | -1.1648 | 0.018266 | 0.042241 |
| novel_circ_0022113 | 5.260728989 | 0.462846192 | 3.0653  | 0.018362 | 0.042442 |
| novel_circ_0013833 | 1.148607018 | 7.880832579 | -2.7175 | 0.018393 | 0.042492 |
| hsa_circ_0008731   | 26.63528113 | 4.028994202 | 2.6579  | 0.018488 | 0.04267  |
| hsa_circ_0047719   | 0.815518204 | 5.907027785 | -2.8874 | 0.018486 | 0.04267  |
| novel_circ_0002488 | 3.36293626  | 0           | 5.4354  | 0.018506 | 0.042691 |
| hsa_circ_0003939   | 0           | 3.949377316 | -5.4278 | 0.018571 | 0.042773 |
| hsa_circ_0039935   | 0           | 3.741694114 | -5.3967 | 0.018643 | 0.042773 |
| hsa_circ_0061137   | 0           | 3.742663755 | -5.3968 | 0.018639 | 0.042773 |
| novel_circ_0002760 | 0           | 4.059521579 | -5.4434 | 0.018629 | 0.042773 |
| novel_circ_0002877 | 0           | 3.741694114 | -5.3967 | 0.018643 | 0.042773 |
| novel_circ_0006731 | 0           | 3.741694114 | -5.3967 | 0.018643 | 0.042773 |
| novel_circ_0007211 | 6.662269436 | 1.00724855  | 2.7472  | 0.018625 | 0.042773 |
| novel_circ_0009757 | 0           | 3.742663755 | -5.3968 | 0.018639 | 0.042773 |
| novel_circ_0012430 | 0           | 4.059521579 | -5.4434 | 0.018629 | 0.042773 |
| novel_circ_0015554 | 0           | 4.059521579 | -5.4434 | 0.018629 | 0.042773 |
| novel_circ_0019521 | 0           | 3.741694114 | -5.3967 | 0.018643 | 0.042773 |
| hsa_circ_0002657   | 0           | 3.890591403 | -5.4444 | 0.018701 | 0.042848 |
| hsa_circ_0008755   | 0           | 3.848929457 | -5.4106 | 0.018721 | 0.042848 |
| novel_circ_0012505 | 0           | 3.848929457 | -5.4106 | 0.018721 | 0.042848 |
| novel_circ_0017736 | 0           | 3.890591403 | -5.4444 | 0.018701 | 0.042848 |
| novel_circ_0019966 | 0           | 3.848929457 | -5.4106 | 0.018721 | 0.042848 |
| hsa_circ_0001921   | 5.928332966 | 0.694269288 | 2.75    | 0.018741 | 0.042852 |
| novel_circ_0020740 | 0           | 3.845050895 | -5.4099 | 0.018735 | 0.042852 |
| hsa_circ_0037409   | 3.246823575 | 0           | 5.414   | 0.018791 | 0.042945 |
| novel_circ_0009055 | 3.387826356 | 0           | 5.4332  | 0.018852 | 0.043062 |
| hsa_circ_0003250   | 0           | 3.764464369 | -5.4105 | 0.018938 | 0.043141 |
| hsa_circ_0020001   | 0           | 3.764464369 | -5.4105 | 0.018938 | 0.043141 |
| hsa_circ_0030582   | 7.685122914 | 25.98012548 | -1.7356 | 0.018927 | 0.043141 |
| hsa_circ_0030586   | 11.33279415 | 32.35775658 | -1.4958 | 0.018942 | 0.043141 |
| novel_circ_0005542 | 0           | 3.764464369 | -5.4105 | 0.018938 | 0.043141 |
| novel_circ_0013658 | 0           | 3.763494728 | -5.4103 | 0.018942 | 0.043141 |
| hsa_circ_0030594   | 18.2618199  | 4.015748798 | 2.077   | 0.018984 | 0.043217 |
| hsa_circ_0000724   | 2.913734762 | 11.7743329  | -1.9951 | 0.019041 | 0.043283 |
| novel_circ_0002757 | 0           | 4.158030158 | -5.4523 | 0.019038 | 0.043283 |
| novel_circ_0008552 | 0           | 4.158030158 | -5.4523 | 0.019038 | 0.043283 |
| hsa_circ_0001344   | 0           | 3.743633395 | -5.3891 | 0.01912  | 0.043295 |
| hsa_circ_0003930   | 0           | 3.743633395 | -5.3891 | 0.01912  | 0.043295 |
| hsa_circ_0018054   | 0           | 3.743633395 | -5.3891 | 0.01912  | 0.043295 |
| hsa_circ_0029636   | 0           | 3.740724474 | -5.3885 | 0.01913  | 0.043295 |
| hsa_circ_0035958   | 0           | 3.743633395 | -5.3891 | 0.01912  | 0.043295 |
| hsa_circ_0039932   | 0           | 3.740724474 | -5.3885 | 0.01913  | 0.043295 |
| hsa_circ_0087765   | 13.39778281 | 3.275939001 | 2.0065  | 0.019083 | 0.043295 |
| novel_circ_0013219 | 0           | 3.743633395 | -5.3891 | 0.01912  | 0.043295 |
| novel_circ_0021240 | 0           | 3.743633395 | -5.3891 | 0.01912  | 0.043295 |
| hsa_circ_0033180   | 3.221933479 | 0           | 5.4042  | 0.019189 | 0.043386 |
| novel_circ_0014232 | 3.221933479 | 0           | 5.4042  | 0.019189 | 0.043386 |
| hsa_circ_0061009   | 3.313156068 | 0           | 5.4175  | 0.0192   | 0.04339  |
| hsa_circ_0005594   | 22.93782971 | 9.144213761 | 1.3357  | 0.01936  | 0.043732 |
| hsa_circ_0006209   | 17.38415124 | 5.531555602 | 1.6527  | 0.019444 | 0.043897 |

|                    |             |             |         |          |          |
|--------------------|-------------|-------------|---------|----------|----------|
| hsa_circ_0006914   | 0           | 3.637367694 | -5.3684 | 0.019471 | 0.043897 |
| hsa_circ_0027244   | 0           | 3.637367694 | -5.3684 | 0.019471 | 0.043897 |
| novel_circ_0012039 | 0           | 3.637367694 | -5.3684 | 0.019471 | 0.043897 |
| novel_circ_0001225 | 3.155600986 | 0           | 5.3884  | 0.019542 | 0.043993 |
| novel_circ_0007831 | 3.155600986 | 0           | 5.3884  | 0.019542 | 0.043993 |
| novel_circ_0016545 | 3.155600986 | 0           | 5.3884  | 0.019542 | 0.043993 |
| hsa_circ_0001980   | 15.03154863 | 4.625724551 | 1.7197  | 0.01959  | 0.04408  |
| hsa_circ_0007832   | 0           | 3.636398053 | -5.363  | 0.019788 | 0.044503 |
| hsa_circ_0000166   | 0           | 3.719893501 | -5.3559 | 0.019895 | 0.044617 |
| hsa_circ_0056362   | 4.128674272 | 14.10083963 | -1.771  | 0.01988  | 0.044617 |
| hsa_circ_0067233   | 0           | 3.720863141 | -5.3561 | 0.019892 | 0.044617 |
| novel_circ_0006799 | 0           | 3.719893501 | -5.3559 | 0.019895 | 0.044617 |
| novel_circ_0011459 | 0           | 3.719893501 | -5.3559 | 0.019895 | 0.044617 |
| novel_circ_0017182 | 0           | 3.719893501 | -5.3559 | 0.019895 | 0.044617 |
| hsa_circ_0008460   | 3.714003724 | 13.68918023 | -1.8386 | 0.019969 | 0.04476  |
| hsa_circ_0009353   | 46.3913167  | 20.4348695  | 1.1858  | 0.019989 | 0.044782 |
| hsa_circ_0056714   | 0           | 3.824219922 | -5.3704 | 0.020056 | 0.04489  |
| novel_circ_0018416 | 0           | 3.826159202 | -5.3708 | 0.020048 | 0.04489  |
| novel_circ_0000522 | 0           | 3.61556708  | -5.3361 | 0.020148 | 0.045052 |
| novel_circ_0015259 | 0           | 3.61556708  | -5.3361 | 0.020148 | 0.045052 |
| hsa_circ_0020181   | 1.398811038 | 7.274735387 | -2.3173 | 0.020176 | 0.045093 |
| hsa_circ_0024230   | 0           | 3.721832781 | -5.3518 | 0.020208 | 0.045101 |
| hsa_circ_0030509   | 0           | 3.721832781 | -5.3518 | 0.020208 | 0.045101 |
| novel_circ_0016187 | 0           | 3.721832781 | -5.3518 | 0.020208 | 0.045101 |
| novel_circ_0012153 | 0           | 3.71892386  | -5.3512 | 0.02022  | 0.045105 |
| hsa_circ_0009096   | 0           | 3.614597439 | -5.3332 | 0.020344 | 0.045161 |
| hsa_circ_0039388   | 0           | 3.614597439 | -5.3332 | 0.020344 | 0.045161 |
| hsa_circ_0039389   | 0           | 3.61653672  | -5.3336 | 0.020336 | 0.045161 |
| hsa_circ_0070552   | 8.6581962   | 1.932940934 | 2.0614  | 0.020361 | 0.045161 |
| hsa_circ_0071580   | 0           | 3.659168307 | -5.3713 | 0.020355 | 0.045161 |
| novel_circ_0007834 | 0           | 3.61653672  | -5.3336 | 0.020336 | 0.045161 |
| novel_circ_0010820 | 0           | 3.614597439 | -5.3332 | 0.020344 | 0.045161 |
| novel_circ_0011240 | 0           | 3.614597439 | -5.3332 | 0.020344 | 0.045161 |
| novel_circ_0011248 | 0           | 3.61653672  | -5.3336 | 0.020336 | 0.045161 |
| novel_circ_0016528 | 0           | 3.614597439 | -5.3332 | 0.020344 | 0.045161 |
| novel_circ_0018622 | 0           | 3.614597439 | -5.3332 | 0.020344 | 0.045161 |
| novel_circ_0019367 | 0           | 3.61653672  | -5.3336 | 0.020336 | 0.045161 |
| novel_circ_0013019 | 0.583292834 | 5.445151233 | -2.8738 | 0.020392 | 0.045208 |
| hsa_circ_0004599   | 1.690457455 | 8.264061885 | -2.1892 | 0.020404 | 0.045213 |
| hsa_circ_0087247   | 1.531476023 | 8.494515341 | -2.4518 | 0.020432 | 0.045238 |
| hsa_circ_0091072   | 0.874939251 | 7.107916046 | -2.7066 | 0.020434 | 0.045238 |
| novel_circ_0009379 | 0           | 3.823250281 | -5.3645 | 0.020482 | 0.045323 |
| hsa_circ_0003673   | 23.57505849 | 8.473684368 | 1.4843  | 0.020504 | 0.04535  |
| hsa_circ_0007108   | 2.680083041 | 15.26668187 | -2.4615 | 0.020523 | 0.045371 |
| hsa_circ_0062885   | 26.30910376 | 10.71960456 | 1.3023  | 0.020622 | 0.045568 |
| hsa_circ_0002801   | 28.25652711 | 9.370788655 | 1.5918  | 0.020757 | 0.045588 |
| hsa_circ_0003832   | 12.19248415 | 35.77356914 | -1.5135 | 0.02068  | 0.045588 |
| hsa_circ_0004227   | 0           | 3.511240659 | -5.311  | 0.020793 | 0.045588 |
| hsa_circ_0004550   | 5.828772581 | 17.45187687 | -1.5436 | 0.020666 | 0.045588 |
| hsa_circ_0005116   | 0           | 3.510271019 | -5.3108 | 0.020797 | 0.045588 |
| hsa_circ_0005394   | 0           | 3.532071632 | -5.3319 | 0.020791 | 0.045588 |
| hsa_circ_0007046   | 0           | 3.533041273 | -5.3321 | 0.020787 | 0.045588 |
| hsa_circ_0008434   | 0           | 3.511240659 | -5.311  | 0.020793 | 0.045588 |
| hsa_circ_0008945   | 0           | 3.511240659 | -5.311  | 0.020793 | 0.045588 |
| hsa_circ_0009063   | 0           | 3.532071632 | -5.3319 | 0.020791 | 0.045588 |
| hsa_circ_0044650   | 0           | 3.532071632 | -5.3319 | 0.020791 | 0.045588 |
| hsa_circ_0055002   | 0           | 3.510271019 | -5.3108 | 0.020797 | 0.045588 |
| hsa_circ_0056248   | 0.765738012 | 6.302532855 | -2.9463 | 0.020756 | 0.045588 |
| novel_circ_0003627 | 0           | 3.510271019 | -5.3108 | 0.020797 | 0.045588 |
| novel_circ_0004278 | 0           | 3.511240659 | -5.311  | 0.020793 | 0.045588 |
| novel_circ_0008088 | 0           | 3.532071632 | -5.3319 | 0.020791 | 0.045588 |
| novel_circ_0016135 | 2.023546268 | 9.610938514 | -2.1456 | 0.020735 | 0.045588 |
| hsa_circ_0000179   | 74.12397202 | 35.50015454 | 1.0632  | 0.020808 | 0.045589 |
| hsa_circ_0008212   | 11.10748022 | 1.851384767 | 2.3667  | 0.02089  | 0.045748 |
| hsa_circ_0001163   | 0           | 3.613627799 | -5.3238 | 0.020994 | 0.04575  |

|                    |             |             |         |          |          |
|--------------------|-------------|-------------|---------|----------|----------|
| hsa_circ_0002212   | 0           | 3.613627799 | -5.3238 | 0.020994 | 0.04575  |
| hsa_circ_0002669   | 0           | 3.613627799 | -5.3238 | 0.020994 | 0.04575  |
| hsa_circ_0005904   | 32.99210754 | 13.07549747 | 1.3004  | 0.020998 | 0.04575  |
| hsa_circ_0054178   | 0           | 3.613627799 | -5.3238 | 0.020994 | 0.04575  |
| hsa_circ_0074486   | 0           | 3.71795422  | -5.3409 | 0.020961 | 0.04575  |
| novel_circ_0004577 | 5.144616304 | 0.673438314 | 2.9141  | 0.020947 | 0.04575  |
| novel_circ_0005774 | 0           | 3.617506361 | -5.3246 | 0.020978 | 0.04575  |
| novel_circ_0016494 | 0           | 3.613627799 | -5.3238 | 0.020994 | 0.04575  |
| novel_circ_0018050 | 0           | 3.617506361 | -5.3246 | 0.020978 | 0.04575  |
| novel_circ_0021647 | 0           | 3.613627799 | -5.3238 | 0.020994 | 0.04575  |
| hsa_circ_0007430   | 2.839064473 | 10.78985461 | -1.9004 | 0.021075 | 0.045896 |
| hsa_circ_0003017   | 0.874939251 | 7.1306863   | -2.7216 | 0.021181 | 0.046105 |
| hsa_circ_0000234   | 0           | 3.828098483 | -5.3543 | 0.021278 | 0.04612  |
| hsa_circ_0001985   | 0           | 3.512210299 | -5.3035 | 0.021314 | 0.04612  |
| hsa_circ_0002802   | 3.372577114 | 12.95130972 | -1.8798 | 0.021245 | 0.04612  |
| hsa_circ_0007737   | 0           | 3.512210299 | -5.3035 | 0.021314 | 0.04612  |
| hsa_circ_0019610   | 0           | 3.512210299 | -5.3035 | 0.021314 | 0.04612  |
| hsa_circ_0057151   | 0           | 3.822280641 | -5.3531 | 0.021305 | 0.04612  |
| hsa_circ_0083974   | 0           | 3.512210299 | -5.3035 | 0.021314 | 0.04612  |
| novel_circ_0000523 | 0           | 3.822280641 | -5.3531 | 0.021305 | 0.04612  |
| novel_circ_0002294 | 0           | 3.509301378 | -5.3029 | 0.021326 | 0.04612  |
| novel_circ_0011067 | 0           | 3.509301378 | -5.3029 | 0.021326 | 0.04612  |
| novel_circ_0011526 | 0           | 3.822280641 | -5.3531 | 0.021305 | 0.04612  |
| novel_circ_0012193 | 0           | 3.509301378 | -5.3029 | 0.021326 | 0.04612  |
| novel_circ_0012288 | 0           | 3.512210299 | -5.3035 | 0.021314 | 0.04612  |
| novel_circ_0021438 | 0           | 3.512210299 | -5.3035 | 0.021314 | 0.04612  |
| novel_circ_0002422 | 10.16893789 | 2.16436403  | 2.1461  | 0.02135  | 0.04615  |
| novel_circ_0000965 | 0.874939251 | 6.578526819 | -2.6189 | 0.021362 | 0.046154 |
| hsa_circ_0054963   | 21.52116331 | 6.940925151 | 1.5848  | 0.021421 | 0.04626  |
| hsa_circ_0004608   | 1.166585668 | 7.801215694 | -2.471  | 0.021553 | 0.046523 |
| hsa_circ_0000182   | 12.08055351 | 30.01818956 | -1.2951 | 0.021591 | 0.046577 |
| hsa_circ_0001018   | 0           | 3.405944598 | -5.2829 | 0.021628 | 0.046577 |
| hsa_circ_0004348   | 0           | 3.405944598 | -5.2829 | 0.021628 | 0.046577 |
| novel_circ_0000799 | 0           | 3.405944598 | -5.2829 | 0.021628 | 0.046577 |
| novel_circ_0007635 | 1.148607018 | 7.228225238 | -2.6122 | 0.021625 | 0.046577 |
| novel_circ_0002251 | 1.349030846 | 7.528928737 | -2.3849 | 0.021681 | 0.04667  |
| hsa_circ_0034972   | 72.98773527 | 30.37927514 | 1.2481  | 0.021703 | 0.046696 |
| novel_circ_0004888 | 15.53195667 | 3.148842326 | 2.2774  | 0.021714 | 0.046699 |
| hsa_circ_0030049   | 4.212985415 | 13.30885985 | -1.6465 | 0.021728 | 0.046707 |
| hsa_circ_0000105   | 17.42286423 | 43.14762474 | -1.3079 | 0.021769 | 0.046755 |
| novel_circ_0001869 | 13.17116583 | 3.86976043  | 1.7014  | 0.02177  | 0.046755 |
| hsa_circ_0006428   | 29.16887629 | 11.24494368 | 1.3531  | 0.021809 | 0.046816 |
| hsa_circ_0008286   | 1.398811038 | 7.149577993 | -2.2853 | 0.021884 | 0.046956 |
| hsa_circ_0000469   | 0           | 3.406914238 | -5.2781 | 0.021962 | 0.047098 |
| novel_circ_0005232 | 0           | 3.404974957 | -5.2777 | 0.02197  | 0.047098 |
| novel_circ_0016686 | 0.583292834 | 5.528646681 | -2.8699 | 0.022028 | 0.0472   |
| novel_circ_0012925 | 38.8431641  | 14.84549763 | 1.3668  | 0.022117 | 0.047369 |
| hsa_circ_0005009   | 0.815518204 | 5.550447295 | -2.7919 | 0.022196 | 0.047481 |
| hsa_circ_0005728   | 131.4221248 | 61.11046767 | 1.1006  | 0.0222   | 0.047481 |
| novel_circ_0004309 | 0.815518204 | 5.549477654 | -2.7918 | 0.022198 | 0.047481 |
| novel_circ_0000677 | 1.531476023 | 8.367418666 | -2.4252 | 0.022212 | 0.047484 |
| novel_circ_0018203 | 10.16893789 | 2.141593776 | 2.2321  | 0.022275 | 0.047599 |
| novel_circ_0019466 | 0           | 3.427745211 | -5.2925 | 0.022305 | 0.047641 |
| hsa_circ_0001247   | 24.86742398 | 60.1287132  | -1.2735 | 0.02232  | 0.04765  |
| novel_circ_0018658 | 0.583292834 | 5.422380979 | -2.8495 | 0.022375 | 0.047746 |
| hsa_circ_0002566   | 8.116345762 | 22.37345672 | -1.473  | 0.022416 | 0.047812 |
| hsa_circ_0071174   | 4.083049837 | 24.15750037 | -2.4147 | 0.022466 | 0.047897 |
| hsa_circ_0002397   | 0.874939251 | 6.709502055 | -2.6532 | 0.022698 | 0.048368 |
| hsa_circ_0063408   | 2.955177158 | 0           | 5.2792  | 0.022776 | 0.048491 |
| hsa_circ_0088910   | 2.955177158 | 0           | 5.2792  | 0.022776 | 0.048491 |
| hsa_circ_0001403   | 0           | 3.384143984 | -5.2413 | 0.022907 | 0.048614 |
| hsa_circ_0023940   | 1.531476023 | 8.577041148 | -2.45   | 0.022895 | 0.048614 |
| hsa_circ_0030256   | 0           | 3.384143984 | -5.2413 | 0.022907 | 0.048614 |
| novel_circ_0008579 | 0           | 3.488470405 | -5.2593 | 0.022887 | 0.048614 |
| novel_circ_0012162 | 0           | 3.488470405 | -5.2593 | 0.022887 | 0.048614 |

|                    |             |             |         |          |          |
|--------------------|-------------|-------------|---------|----------|----------|
| novel_circ_0017707 | 0           | 3.384143984 | -5.2413 | 0.022907 | 0.048614 |
| novel_circ_0021053 | 0           | 3.489440045 | -5.2595 | 0.022882 | 0.048614 |
| hsa_circ_0008893   | 6.508896392 | 0.694269288 | 2.8566  | 0.022997 | 0.048626 |
| hsa_circ_0066278   | 0           | 3.300648536 | -5.2467 | 0.023006 | 0.048626 |
| novel_circ_0000592 | 0           | 3.300648536 | -5.2467 | 0.023006 | 0.048626 |
| novel_circ_0002750 | 0           | 3.300648536 | -5.2467 | 0.023006 | 0.048626 |
| novel_circ_0003344 | 2.980067254 | 0           | 5.2803  | 0.022956 | 0.048626 |
| novel_circ_0012189 | 2.980067254 | 0           | 5.2803  | 0.022956 | 0.048626 |
| novel_circ_0012477 | 0           | 3.300648536 | -5.2467 | 0.023006 | 0.048626 |
| novel_circ_0013294 | 0           | 3.301618177 | -5.2469 | 0.023001 | 0.048626 |
| novel_circ_0020707 | 0           | 3.300648536 | -5.2467 | 0.023006 | 0.048626 |
| hsa_circ_0057727   | 0.765738012 | 5.445151233 | -2.7897 | 0.02304  | 0.048677 |
| hsa_circ_0000073   | 0           | 3.385113624 | -5.2388 | 0.023115 | 0.0487   |
| hsa_circ_0002664   | 0.815518204 | 5.572247909 | -2.807  | 0.023078 | 0.0487   |
| novel_circ_0004733 | 0           | 3.385113624 | -5.2388 | 0.023115 | 0.0487   |
| novel_circ_0009586 | 19.14224425 | 4.705341437 | 2.03    | 0.023124 | 0.0487   |
| novel_circ_0015998 | 0           | 3.383174343 | -5.2384 | 0.023124 | 0.0487   |
| novel_circ_0021077 | 0           | 3.383174343 | -5.2384 | 0.023124 | 0.0487   |
| novel_circ_0022234 | 0           | 3.385113624 | -5.2388 | 0.023115 | 0.0487   |
| hsa_circ_0010051   | 4.996702077 | 0.673438314 | 2.9052  | 0.02314  | 0.04871  |
| novel_circ_0000445 | 11.07294927 | 1.851384767 | 2.3575  | 0.023203 | 0.048822 |
| hsa_circ_0049267   | 2.930287062 | 0           | 5.2688  | 0.023266 | 0.048887 |
| novel_circ_0002559 | 2.930287062 | 0           | 5.2688  | 0.023266 | 0.048887 |
| novel_circ_0017569 | 0           | 3.487500764 | -5.2547 | 0.023253 | 0.048887 |
| hsa_circ_0000819   | 0           | 3.279817563 | -5.2169 | 0.023464 | 0.04905  |
| hsa_circ_0000852   | 0           | 3.279817563 | -5.2169 | 0.023464 | 0.04905  |
| hsa_circ_0002485   | 0           | 3.278847923 | -5.2167 | 0.023469 | 0.04905  |
| hsa_circ_0014191   | 0           | 3.278847923 | -5.2167 | 0.023469 | 0.04905  |
| hsa_circ_0056840   | 0           | 3.278847923 | -5.2167 | 0.023469 | 0.04905  |
| hsa_circ_0081342   | 0           | 3.279817563 | -5.2169 | 0.023464 | 0.04905  |
| hsa_circ_0091576   | 2.863954569 | 0           | 5.2559  | 0.023394 | 0.04905  |
| novel_circ_0000585 | 2.863954569 | 0           | 5.2559  | 0.023394 | 0.04905  |
| novel_circ_0008817 | 1.148607018 | 7.942355859 | -2.7346 | 0.023378 | 0.04905  |
| novel_circ_0017043 | 0           | 3.279817563 | -5.2169 | 0.023464 | 0.04905  |
| novel_circ_0017806 | 0           | 3.278847923 | -5.2167 | 0.023469 | 0.04905  |
| novel_circ_0018719 | 0           | 3.278847923 | -5.2167 | 0.023469 | 0.04905  |
| hsa_circ_0002976   | 2.839064473 | 0           | 5.2503  | 0.023548 | 0.049171 |
| novel_circ_0006331 | 2.839064473 | 0           | 5.2503  | 0.023548 | 0.049171 |
| hsa_circ_0000669   | 11.96717023 | 1.851384767 | 2.4818  | 0.023641 | 0.049321 |
| novel_circ_0004304 | 5.778992388 | 21.03788622 | -1.8094 | 0.023641 | 0.049321 |
| hsa_circ_0000021   | 69.08870653 | 34.33173293 | 1.0026  | 0.023653 | 0.049324 |
| hsa_circ_0058497   | 52.6002026  | 21.97213381 | 1.2377  | 0.023684 | 0.049367 |
| hsa_circ_0001811   | 33.80619939 | 74.32890563 | -1.1371 | 0.023859 | 0.049545 |
| hsa_circ_0002542   | 13.17116583 | 3.090056414 | 1.9737  | 0.023861 | 0.049545 |
| hsa_circ_0006487   | 0           | 3.386083265 | -5.2301 | 0.023826 | 0.049545 |
| hsa_circ_0027353   | 0           | 3.382204703 | -5.2293 | 0.023846 | 0.049545 |
| hsa_circ_0056558   | 0           | 3.386083265 | -5.2301 | 0.023826 | 0.049545 |
| novel_circ_0002718 | 0           | 3.386083265 | -5.2301 | 0.023826 | 0.049545 |
| novel_circ_0006139 | 0           | 3.386083265 | -5.2301 | 0.023826 | 0.049545 |
| novel_circ_0015202 | 7.826125696 | 1.597191417 | 2.1546  | 0.023865 | 0.049545 |
| novel_circ_0015583 | 0           | 3.382204703 | -5.2293 | 0.023846 | 0.049545 |
| hsa_circ_0009104   | 0           | 3.280787203 | -5.2097 | 0.024035 | 0.049774 |
| hsa_circ_0031731   | 0           | 3.277878282 | -5.2091 | 0.02405  | 0.049774 |
| hsa_circ_0076410   | 0           | 3.277878282 | -5.2091 | 0.02405  | 0.049774 |
| novel_circ_0001976 | 0           | 3.277878282 | -5.2091 | 0.02405  | 0.049774 |
| novel_circ_0006252 | 0           | 3.277878282 | -5.2091 | 0.02405  | 0.049774 |
| novel_circ_0008804 | 0           | 3.280787203 | -5.2097 | 0.024035 | 0.049774 |
| novel_circ_0018260 | 0           | 3.277878282 | -5.2091 | 0.02405  | 0.049774 |
| hsa_circ_0001429   | 0           | 3.486531124 | -5.2443 | 0.024093 | 0.049818 |
| hsa_circ_0023806   | 0           | 3.486531124 | -5.2443 | 0.024093 | 0.049818 |
| hsa_circ_0002028   | 0           | 3.174521502 | -5.1893 | 0.024275 | 0.049951 |
| hsa_circ_0002117   | 0           | 3.174521502 | -5.1893 | 0.024275 | 0.049951 |
| hsa_circ_0003856   | 8.524104864 | 22.45598253 | -1.4091 | 0.024203 | 0.049951 |
| hsa_circ_0028201   | 0           | 3.174521502 | -5.1893 | 0.024275 | 0.049951 |
| hsa_circ_0046029   | 0           | 3.174521502 | -5.1893 | 0.024275 | 0.049951 |

|                    |             |             |         |          |          |
|--------------------|-------------|-------------|---------|----------|----------|
| hsa_circ_0054345   | 0           | 3.174521502 | -5.1893 | 0.024275 | 0.049951 |
| novel_circ_0010124 | 5.969775363 | 1.00724855  | 2.5883  | 0.024225 | 0.049951 |
| novel_circ_0011308 | 0           | 3.174521502 | -5.1893 | 0.024275 | 0.049951 |
| novel_circ_0015086 | 0           | 3.174521502 | -5.1893 | 0.024275 | 0.049951 |
| novel_circ_0015950 | 0           | 3.174521502 | -5.1893 | 0.024275 | 0.049951 |
| novel_circ_0019996 | 0           | 3.174521502 | -5.1893 | 0.024275 | 0.049951 |
| novel_circ_0013346 | 1.581256216 | 7.759382193 | -2.3402 | 0.024303 | 0.049986 |

raw Ct data-circRNA-0000607

| sample    | Raw Ct      | Ct Mean     |              |
|-----------|-------------|-------------|--------------|
| control-1 | 28.986166   | 28.96342468 | GAPDH        |
| control-1 | 27.96869659 | 28.96342468 | GAPDH        |
| control-1 | 29.93541336 | 28.96342468 | GAPDH        |
| control-2 | 27.99703979 | 27.13468361 | GAPDH        |
| control-2 | 26.42168617 | 27.13468361 | GAPDH        |
| control-2 | 26.98532677 | 27.13468361 | GAPDH        |
| control-3 | 24.32445526 | 24.02895927 | GAPDH        |
| control-3 | 23.98655128 | 24.02895927 | GAPDH        |
| control-3 | 23.77586937 | 24.02895927 | GAPDH        |
| control-4 | 24.01070595 | 24.58120155 | GAPDH        |
| control-4 | 24.95363426 | 24.58120155 | GAPDH        |
| control-4 | 24.77926636 | 24.58120155 | GAPDH        |
| control-5 | 27.71316719 | 28.22460938 | GAPDH        |
| control-5 | 28.46683121 | 28.22460938 | GAPDH        |
| control-5 | 28.49383354 | 28.22460938 | GAPDH        |
| control-6 | 23.99707031 | 23.90258789 | GAPDH        |
| control-6 | 23.96064949 | 23.90258789 | GAPDH        |
| control-6 | 23.75004387 | 23.90258789 | GAPDH        |
| control-7 | 25.62896347 | 26.07480049 | GAPDH        |
| control-7 | 25.98989105 | 26.07480049 | GAPDH        |
| control-7 | 26.60554886 | 26.07480049 | GAPDH        |
| control-8 | 23.97501373 | 24.74778175 | GAPDH        |
| control-8 | 24.88467979 | 24.74778175 | GAPDH        |
| control-8 | 25.38365364 | 24.74778175 | GAPDH        |
| stroke-1  | 22.81828117 | 23.25094604 | GAPDH        |
| stroke-1  | 23.6321888  | 23.25094604 | GAPDH        |
| stroke-1  | 23.30237007 | 23.25094604 | GAPDH        |
| stroke-2  | 24.24754715 | 24.11670876 | GAPDH        |
| stroke-2  | 23.96543312 | 24.11670876 | GAPDH        |
| stroke-2  | 24.13714218 | 24.11670876 | GAPDH        |
| stroke-3  | 24.44216728 | 23.7510891  | GAPDH        |
| stroke-3  | 21.98332214 | 23.7510891  | GAPDH        |
| stroke-3  | 24.82777214 | 23.7510891  | GAPDH        |
| stroke-4  | 21.99193001 | 21.82296753 | GAPDH        |
| stroke-4  | 21.22269249 | 21.82296753 | GAPDH        |
| stroke-4  | 22.254282   | 21.82296753 | GAPDH        |
| stroke-5  | 23.41270638 | 23.87949944 | GAPDH        |
| stroke-5  | 24.31710625 | 23.87949944 | GAPDH        |
| stroke-5  | 23.90868568 | 23.87949944 | GAPDH        |
| stroke-6  | 21.50953865 | 22.07132721 | GAPDH        |
| stroke-6  | 22.97553635 | 22.07132721 | GAPDH        |
| stroke-6  | 21.72891045 | 22.07132721 | GAPDH        |
| stroke-7  | 21.9685936  | 22.42323303 | GAPDH        |
| stroke-7  | 21.89948082 | 22.42323303 | GAPDH        |
| stroke-7  | 23.40161896 | 22.42323303 | GAPDH        |
| stroke-8  | 24.72301102 | 24.3835392  | GAPDH        |
| stroke-8  | 23.79771042 | 24.3835392  | GAPDH        |
| stroke-8  | 24.62989235 | 24.3835392  | GAPDH        |
| control-1 | 30.2010498  | 30.12251282 | circ-0000607 |
| control-1 | 29.85174179 | 30.12251282 | circ-0000607 |
| control-1 | 30.31474876 | 30.12251282 | circ-0000607 |
| control-2 | 29.86787224 | 30.4516468  | circ-0000607 |
| control-2 | 30.96028709 | 30.4516468  | circ-0000607 |

|            |             |             |              |
|------------|-------------|-------------|--------------|
| control-2  | 30.52678108 | 30.4516468  | circ-0000607 |
| control-3  | 27.002388   | 26.98674965 | circ-0000607 |
| control-3  | 27.23257637 | 26.98674965 | circ-0000607 |
| control-3  | 26.72528267 | 26.98674965 | circ-0000607 |
| control-4  | 26.16671371 | 26.52879333 | circ-0000607 |
| control-4  | 27.34694672 | 26.52879333 | circ-0000607 |
| control-4  | 26.07271767 | 26.52879333 | circ-0000607 |
| control-5  | 29.00901794 | 29.44142151 | circ-0000607 |
| control-5  | 29.97493172 | 29.44142151 | circ-0000607 |
| control-5  | 29.34031105 | 29.44142151 | circ-0000607 |
| control-6  | 26.46099281 | 26.09449768 | circ-0000607 |
| control-6  | 25.42113495 | 26.09449768 | circ-0000607 |
| control-6  | 26.40136909 | 26.09449768 | circ-0000607 |
| control-7  | 27.76145554 | 27.7904911  | circ-0000607 |
| control-7  | 27.78826141 | 27.7904911  | circ-0000607 |
| control-7  | 27.82175255 | 27.7904911  | circ-0000607 |
| control-8  | 26.03160095 | 26.35666656 | circ-0000607 |
| control-8  | 26.59160995 | 26.35666656 | circ-0000607 |
| control-8  | 26.44678688 | 26.35666656 | circ-0000607 |
| stroke-1   | 24.6139946  | 24.2837677  | circ-0000607 |
| stroke-1   | 23.85692978 | 24.2837677  | circ-0000607 |
| stroke-1   | 24.38037491 | 24.2837677  | circ-0000607 |
| stroke-2   | 25.96882057 | 27.04850769 | circ-0000607 |
| stroke-2   | 27.71820831 | 27.04850769 | circ-0000607 |
| stroke-2   | 27.45849609 | 27.04850769 | circ-0000607 |
| stroke-3   | 28.25543785 | 28.05039215 | circ-0000607 |
| stroke-3   | 28.0123024  | 28.05039215 | circ-0000607 |
| stroke-3   | 27.8834362  | 28.05039215 | circ-0000607 |
| stroke-4   | 25.77251244 | 26.16079712 | circ-0000607 |
| stroke-4   | 26.86099815 | 26.16079712 | circ-0000607 |
| stroke-4   | 25.84887886 | 26.16079712 | circ-0000607 |
| stroke-5   | 27.9960022  | 26.85706139 | circ-0000607 |
| stroke-5   | 26.64691353 | 26.85706139 | circ-0000607 |
| stroke-5   | 25.92826271 | 26.85706139 | circ-0000607 |
| stroke-6   | 25.91727257 | 25.67337036 | circ-0000607 |
| stroke-6   | 25.12128258 | 25.67337036 | circ-0000607 |
| stroke-6   | 25.98155403 | 25.67337036 | circ-0000607 |
| stroke-7   | 24.96683693 | 25.62806511 | circ-0000607 |
| stroke-7   | 24.76462936 | 25.62806511 | circ-0000607 |
| stroke-7   | 27.15273094 | 25.62806511 | circ-0000607 |
| stroke-8   | 26.74677086 | 26.77631378 | circ-0000607 |
| stroke-8   | 26.7318821  | 26.77631378 | circ-0000607 |
| stroke-8   | 26.85028839 | 26.77631378 | circ-0000607 |
| control-9  | 27.53953171 | 28.13417053 | GAPDH        |
| control-9  | 28.65486717 | 28.13417053 | GAPDH        |
| control-9  | 28.20811653 | 28.13417053 | GAPDH        |
| control-10 | 26.54609299 | 26.59030151 | GAPDH        |
| control-10 | 26.84967422 | 26.59030151 | GAPDH        |
| control-10 | 26.37513542 | 26.59030151 | GAPDH        |
| control-11 | 25.05536079 | 24.33853912 | GAPDH        |
| control-11 | 23.45033836 | 24.33853912 | GAPDH        |
| control-11 | 24.50991631 | 24.33853912 | GAPDH        |
| control-12 | 24.7355423  | 24.47111702 | GAPDH        |
| control-12 | 24.09218979 | 24.47111702 | GAPDH        |
| control-12 | 24.58562279 | 24.47111702 | GAPDH        |
| control-13 | 27.95845222 | 28.37546539 | GAPDH        |
| control-13 | 28.39027214 | 28.37546539 | GAPDH        |
| control-13 | 28.77766991 | 28.37546539 | GAPDH        |
| control-14 | 23.43803215 | 24.06204033 | GAPDH        |
| control-14 | 23.77913475 | 24.06204033 | GAPDH        |
| control-14 | 24.96895409 | 24.06204033 | GAPDH        |
| control-15 | 25.81467628 | 25.26215172 | GAPDH        |
| control-15 | 24.80905724 | 25.26215172 | GAPDH        |
| control-15 | 25.16272354 | 25.26215172 | GAPDH        |
| control-16 | 24.40066528 | 24.31707001 | GAPDH        |

|            |             |             |              |
|------------|-------------|-------------|--------------|
| control-16 | 24.26047897 | 24.31707001 | GAPDH        |
| control-16 | 24.29006767 | 24.31707001 | GAPDH        |
| stroke-9   | 22.51823997 | 22.15864372 | GAPDH        |
| stroke-9   | 22.14232445 | 22.15864372 | GAPDH        |
| stroke-9   | 21.81536484 | 22.15864372 | GAPDH        |
| stroke-10  | 24.56346893 | 24.30210304 | GAPDH        |
| stroke-10  | 23.81158829 | 24.30210304 | GAPDH        |
| stroke-10  | 24.53125191 | 24.30210304 | GAPDH        |
| stroke-11  | 24.77765274 | 24.3769989  | GAPDH        |
| stroke-11  | 24.04597473 | 24.3769989  | GAPDH        |
| stroke-11  | 24.30736732 | 24.3769989  | GAPDH        |
| stroke-12  | 22.65849876 | 22.55952263 | GAPDH        |
| stroke-12  | 21.888237   | 22.55952263 | GAPDH        |
| stroke-12  | 23.1318264  | 22.55952263 | GAPDH        |
| stroke-13  | 23.57981491 | 23.95546532 | GAPDH        |
| stroke-13  | 24.11337471 | 23.95546532 | GAPDH        |
| stroke-13  | 24.17320442 | 23.95546532 | GAPDH        |
| stroke-14  | 22.18286514 | 21.92886925 | GAPDH        |
| stroke-14  | 21.3039608  | 21.92886925 | GAPDH        |
| stroke-14  | 22.29978371 | 21.92886925 | GAPDH        |
| stroke-15  | 22.67212868 | 22.87604523 | GAPDH        |
| stroke-15  | 22.58248138 | 22.87604523 | GAPDH        |
| stroke-15  | 23.37352562 | 22.87604523 | GAPDH        |
| stroke-16  | 24.93684387 | 24.96379662 | GAPDH        |
| stroke-16  | 24.99489975 | 24.96379662 | GAPDH        |
| stroke-16  | 24.95964241 | 24.96379662 | GAPDH        |
| control-9  | 29.79476547 | 28.68559265 | circ-0000607 |
| control-9  | 28.9161396  | 28.68559265 | circ-0000607 |
| control-9  | 27.34587097 | 28.68559265 | circ-0000607 |
| control-10 | 30.24912453 | 30.37117004 | circ-0000607 |
| control-10 | 30.08897018 | 30.37117004 | circ-0000607 |
| control-10 | 30.77541924 | 30.37117004 | circ-0000607 |
| control-11 | 29.81713867 | 28.6261692  | circ-0000607 |
| control-11 | 28.21579361 | 28.6261692  | circ-0000607 |
| control-11 | 27.84558105 | 28.6261692  | circ-0000607 |
| control-12 | 27.64474678 | 27.66439629 | circ-0000607 |
| control-12 | 27.62210274 | 27.66439629 | circ-0000607 |
| control-12 | 27.72634125 | 27.66439629 | circ-0000607 |
| control-13 | 30.8066864  | 30.77066803 | circ-0000607 |
| control-13 | 31.57831573 | 30.77066803 | circ-0000607 |
| control-13 | 29.92700005 | 30.77066803 | circ-0000607 |
| control-14 | 27.18829536 | 27.44194603 | circ-0000607 |
| control-14 | 27.49446297 | 27.44194603 | circ-0000607 |
| control-14 | 27.64307976 | 27.44194603 | circ-0000607 |
| control-15 | 28.06015396 | 28.11866188 | circ-0000607 |
| control-15 | 28.44386292 | 28.11866188 | circ-0000607 |
| control-15 | 27.85197067 | 28.11866188 | circ-0000607 |
| control-16 | 27.93567276 | 27.87058449 | circ-0000607 |
| control-16 | 27.75416756 | 27.87058449 | circ-0000607 |
| control-16 | 27.92190933 | 27.87058449 | circ-0000607 |
| stroke-9   | 28.08120155 | 27.51510048 | circ-0000607 |
| stroke-9   | 27.15916443 | 27.51510048 | circ-0000607 |
| stroke-9   | 27.30493736 | 27.51510048 | circ-0000607 |
| stroke-10  | 28.92417336 | 28.55953789 | circ-0000607 |
| stroke-10  | 27.3516407  | 28.55953789 | circ-0000607 |
| stroke-10  | 29.40280151 | 28.55953789 | circ-0000607 |
| stroke-11  | 30.40820503 | 29.67177773 | circ-0000607 |
| stroke-11  | 29.67686081 | 29.67177773 | circ-0000607 |
| stroke-11  | 28.93027115 | 29.67177773 | circ-0000607 |
| stroke-12  | 27.23206902 | 28.00384331 | circ-0000607 |
| stroke-12  | 28.0997982  | 28.00384331 | circ-0000607 |
| stroke-12  | 28.67965698 | 28.00384331 | circ-0000607 |
| stroke-13  | 29.16504478 | 27.81465149 | circ-0000607 |
| stroke-13  | 27.65477943 | 27.81465149 | circ-0000607 |
| stroke-13  | 26.62412643 | 27.81465149 | circ-0000607 |

|            |             |             |              |
|------------|-------------|-------------|--------------|
| stroke-14  | 26.91100121 | 26.65208626 | circ-0000607 |
| stroke-14  | 27.22218323 | 26.65208626 | circ-0000607 |
| stroke-14  | 25.82307434 | 26.65208626 | circ-0000607 |
| stroke-15  | 26.37581444 | 27.00505638 | circ-0000607 |
| stroke-15  | 27.12553787 | 27.00505638 | circ-0000607 |
| stroke-15  | 27.51381111 | 27.00505638 | circ-0000607 |
| stroke-16  | 29.12075806 | 29.09998131 | circ-0000607 |
| stroke-16  | 29.22530174 | 29.09998131 | circ-0000607 |
| stroke-16  | 28.95388031 | 29.09998131 | circ-0000607 |
| control-17 | 24.37089729 | 23.65840721 | GAPDH        |
| control-17 | 23.34911919 | 23.65840721 | GAPDH        |
| control-17 | 23.25520515 | 23.65840721 | GAPDH        |
| control-18 | 23.85230255 | 24.05810547 | GAPDH        |
| control-18 | 24.2588501  | 24.05810547 | GAPDH        |
| control-18 | 24.06316757 | 24.05810547 | GAPDH        |
| control-19 | 23.52091026 | 23.08618927 | GAPDH        |
| control-19 | 22.92596436 | 23.08618927 | GAPDH        |
| control-19 | 22.81169128 | 23.08618927 | GAPDH        |
| control-20 | 23.92247963 | 24.03737068 | GAPDH        |
| control-20 | 24.12704659 | 24.03737068 | GAPDH        |
| control-20 | 24.06259155 | 24.03737068 | GAPDH        |
| control-21 | 25.32445526 | 25.54207039 | GAPDH        |
| control-21 | 25.60078812 | 25.54207039 | GAPDH        |
| control-21 | 25.70096779 | 25.54207039 | GAPDH        |
| control-22 | 24.53731346 | 24.4416275  | GAPDH        |
| control-22 | 24.68003845 | 24.4416275  | GAPDH        |
| control-22 | 24.10752869 | 24.4416275  | GAPDH        |
| control-23 | 30.08338928 | 34.30607986 | GAPDH        |
| control-23 | 35.84223938 | 34.30607986 | GAPDH        |
| control-23 | 36.99261475 | 34.30607986 | GAPDH        |
| control-24 | 25.50982666 | 25.45705605 | GAPDH        |
| control-24 | 25.03460693 | 25.45705605 | GAPDH        |
| control-24 | 25.82674026 | 25.45705605 | GAPDH        |
| stroke-17  | 23          | 22.60113525 | GAPDH        |
| stroke-17  | 22.4994278  | 22.60113525 | GAPDH        |
| stroke-17  | 22.30397797 | 22.60113525 | GAPDH        |
| stroke-18  | 22.84053612 | 22.13555145 | GAPDH        |
| stroke-18  | 22.1178112  | 22.13555145 | GAPDH        |
| stroke-18  | 21.44830322 | 22.13555145 | GAPDH        |
| stroke-19  | 23.27849579 | 23.36006355 | GAPDH        |
| stroke-19  | 23.28265762 | 23.36006355 | GAPDH        |
| stroke-19  | 23.51904106 | 23.36006355 | GAPDH        |
| stroke-20  | 26.08442116 | 25.90619469 | GAPDH        |
| stroke-20  | 25.99759102 | 25.90619469 | GAPDH        |
| stroke-20  | 25.63656807 | 25.90619469 | GAPDH        |
| stroke-21  | 23.81067276 | 23.56395721 | GAPDH        |
| stroke-21  | 23.95981598 | 23.56395721 | GAPDH        |
| stroke-21  | 22.9213829  | 23.56395721 | GAPDH        |
| stroke-22  | 22.7163105  | 22.07079124 | GAPDH        |
| stroke-22  | 21.4705925  | 22.07079124 | GAPDH        |
| stroke-22  | 22.02547264 | 22.07079124 | GAPDH        |
| stroke-23  | 22.53122139 | 22.12565041 | GAPDH        |
| stroke-23  | 21.69670296 | 22.12565041 | GAPDH        |
| stroke-23  | 22.14902687 | 22.12565041 | GAPDH        |
| stroke-24  | 25.28538322 | 25.17610168 | GAPDH        |
| stroke-24  | 25.12193108 | 25.17610168 | GAPDH        |
| stroke-24  | 25.12099075 | 25.17610168 | GAPDH        |
| control-17 | 26.08292961 | 25.84122658 | circ-0000607 |
| control-17 | 26.94491577 | 25.84122658 | circ-0000607 |
| control-17 | 24.49583626 | 25.84122658 | circ-0000607 |
| control-18 | 26.46812248 | 25.55987549 | circ-0000607 |
| control-18 | 23.39419746 | 25.55987549 | circ-0000607 |
| control-18 | 26.81730843 | 25.55987549 | circ-0000607 |
| control-19 | 25.63464546 | 25.08820152 | circ-0000607 |
| control-19 | 26.68480682 | 25.08820152 | circ-0000607 |

|            |             |             |              |
|------------|-------------|-------------|--------------|
| control-19 | 22.94515228 | 25.08820152 | circ-0000607 |
| control-20 | 26.65668106 | 26.79709435 | circ-0000607 |
| control-20 | 26.86416054 | 26.79709435 | circ-0000607 |
| control-20 | 26.87043953 | 26.79709435 | circ-0000607 |
| control-21 | 27.31864548 | 25.19190979 | circ-0000607 |
| control-21 | 23.79074287 | 25.19190979 | circ-0000607 |
| control-21 | 24.46634674 | 25.19190979 | circ-0000607 |
| control-22 | 26.63454437 | 26.64724731 | circ-0000607 |
| control-22 | 26.62876511 | 26.64724731 | circ-0000607 |
| control-22 | 26.67843056 | 26.64724731 | circ-0000607 |
| control-23 | 26.01900291 | 24.91068077 | circ-0000607 |
| control-23 | 26.65623856 | 24.91068077 | circ-0000607 |
| control-23 | 22.05679893 | 24.91068077 | circ-0000607 |
| control-24 | 27.06623459 | 27.12625694 | circ-0000607 |
| control-24 | 27.12368584 | 27.12625694 | circ-0000607 |
| control-24 | 27.1888504  | 27.12625694 | circ-0000607 |
| stroke-17  | 25.6360836  | 24.54557037 | circ-0000607 |
| stroke-17  | 20.94773865 | 24.54557037 | circ-0000607 |
| stroke-17  | 27.05288506 | 24.54557037 | circ-0000607 |
| stroke-18  | 27.26455688 | 26.56749916 | circ-0000607 |
| stroke-18  | 25.59686089 | 26.56749916 | circ-0000607 |
| stroke-18  | 26.84108353 | 26.56749916 | circ-0000607 |
| stroke-19  | 26.85122871 | 26.94378853 | circ-0000607 |
| stroke-19  | 26.94581985 | 26.94378853 | circ-0000607 |
| stroke-19  | 27.03432083 | 26.94378853 | circ-0000607 |
| stroke-20  | 27.28665924 | 27.15337372 | circ-0000607 |
| stroke-20  | 27.25465393 | 27.15337372 | circ-0000607 |
| stroke-20  | 26.91880608 | 27.15337372 | circ-0000607 |
| stroke-21  | 27.22332954 | 27.05043602 | circ-0000607 |
| stroke-21  | 26.91497803 | 27.05043602 | circ-0000607 |
| stroke-21  | 27.01300049 | 27.05043602 | circ-0000607 |
| stroke-22  | 26.92191887 | 26.83640862 | circ-0000607 |
| stroke-22  | 26.65605545 | 26.83640862 | circ-0000607 |
| stroke-22  | 26.93125153 | 26.83640862 | circ-0000607 |
| stroke-23  | 26.45792007 | 26.51346397 | circ-0000607 |
| stroke-23  | 26.50614548 | 26.51346397 | circ-0000607 |
| stroke-23  | 26.57632637 | 26.51346397 | circ-0000607 |
| stroke-24  | 27.09989929 | 26.748312   | circ-0000607 |
| stroke-24  | 27.0061245  | 26.748312   | circ-0000607 |
| stroke-24  | 26.13891411 | 26.748312   | circ-0000607 |
| control-25 | 25.09058762 | 25.78330421 | GAPDH        |
| control-25 | 26.45950699 | 25.78330421 | GAPDH        |
| control-25 | 25.79981422 | 25.78330421 | GAPDH        |
| control-26 | 25.61735535 | 25.61603546 | GAPDH        |
| control-26 | 25.59007454 | 25.61603546 | GAPDH        |
| control-26 | 25.64067841 | 25.61603546 | GAPDH        |
| control-27 | 24.85573387 | 25.14356995 | GAPDH        |
| control-27 | 25.42196655 | 25.14356995 | GAPDH        |
| control-27 | 25.1530056  | 25.14356995 | GAPDH        |
| control-28 | 24.89976501 | 25.32396698 | GAPDH        |
| control-28 | 25.32309341 | 25.32396698 | GAPDH        |
| control-28 | 25.7490406  | 25.32396698 | GAPDH        |
| control-29 | 26.63158798 | 26.85236549 | GAPDH        |
| control-29 | 26.92671967 | 26.85236549 | GAPDH        |
| control-29 | 26.99878502 | 26.85236549 | GAPDH        |
| control-30 | 25.79225922 | 25.69767761 | GAPDH        |
| control-30 | 25.60913086 | 25.69767761 | GAPDH        |
| control-30 | 25.69164467 | 25.69767761 | GAPDH        |
| control-31 | 25.68033981 | 25.92655373 | GAPDH        |
| control-31 | 25.97459984 | 25.92655373 | GAPDH        |
| control-31 | 26.12472153 | 25.92655373 | GAPDH        |
| control-32 | 27.30233383 | 27.23433495 | GAPDH        |
| control-32 | 27.28869057 | 27.23433495 | GAPDH        |
| control-32 | 27.11198235 | 27.23433495 | GAPDH        |
| stroke-25  | 23.66721344 | 24.02459717 | GAPDH        |

|            |             |             |              |
|------------|-------------|-------------|--------------|
| stroke-25  | 24.14888    | 24.02459717 | GAPDH        |
| stroke-25  | 24.25769997 | 24.02459717 | GAPDH        |
| stroke-26  | 28.53954315 | 28.14641571 | GAPDH        |
| stroke-26  | 27.82084656 | 28.14641571 | GAPDH        |
| stroke-26  | 28.07885933 | 28.14641571 | GAPDH        |
| stroke-27  | 24.53043365 | 24.71434784 | GAPDH        |
| stroke-27  | 24.66077805 | 24.71434784 | GAPDH        |
| stroke-27  | 24.95183182 | 24.71434784 | GAPDH        |
| stroke-28  | 26.83901787 | 26.77449036 | GAPDH        |
| stroke-28  | 26.897089   | 26.77449036 | GAPDH        |
| stroke-28  | 26.58736229 | 26.77449036 | GAPDH        |
| stroke-29  | 24.98485947 | 25.11204529 | GAPDH        |
| stroke-29  | 25.23482323 | 25.11204529 | GAPDH        |
| stroke-29  | 25.11645508 | 25.11204529 | GAPDH        |
| stroke-30  | 24.8253212  | 23.73656654 | GAPDH        |
| stroke-30  | 23.14415169 | 23.73656654 | GAPDH        |
| stroke-30  | 23.24023056 | 23.73656654 | GAPDH        |
| stroke-31  | 23.63295746 | 23.68496132 | GAPDH        |
| stroke-31  | 23.33071899 | 23.68496132 | GAPDH        |
| stroke-31  | 24.0912056  | 23.68496132 | GAPDH        |
| stroke-32  | 25.65545464 | 25.71642113 | GAPDH        |
| stroke-32  | 25.8227787  | 25.71642113 | GAPDH        |
| stroke-32  | 25.67102623 | 25.71642113 | GAPDH        |
| control-25 | 28.17640877 | 28.43628693 | circ-0000607 |
| control-25 | 28.97157478 | 28.43628693 | circ-0000607 |
| control-25 | 28.16087723 | 28.43628693 | circ-0000607 |
| control-26 | 28.88146973 | 28.34592628 | circ-0000607 |
| control-26 | 28.09176064 | 28.34592628 | circ-0000607 |
| control-26 | 28.06455421 | 28.34592628 | circ-0000607 |
| control-27 | 28.01698685 | 28.22145081 | circ-0000607 |
| control-27 | 28.32868385 | 28.22145081 | circ-0000607 |
| control-27 | 28.31868362 | 28.22145081 | circ-0000607 |
| control-28 | 27.7677002  | 27.06225014 | circ-0000607 |
| control-28 | 27.12875175 | 27.06225014 | circ-0000607 |
| control-28 | 26.29029846 | 27.06225014 | circ-0000607 |
| control-29 | 29.37800217 | 29.61915398 | circ-0000607 |
| control-29 | 29.80021477 | 29.61915398 | circ-0000607 |
| control-29 | 29.67924309 | 29.61915398 | circ-0000607 |
| control-30 | 28.13575935 | 28.08354187 | circ-0000607 |
| control-30 | 27.95761299 | 28.08354187 | circ-0000607 |
| control-30 | 28.15725517 | 28.08354187 | circ-0000607 |
| control-31 | 28.28242493 | 28.51596642 | circ-0000607 |
| control-31 | 28.58515167 | 28.51596642 | circ-0000607 |
| control-31 | 28.68031693 | 28.51596642 | circ-0000607 |
| control-32 | 29.09939957 | 28.37998009 | circ-0000607 |
| control-32 | 27.01730728 | 28.37998009 | circ-0000607 |
| control-32 | 29.02323151 | 28.37998009 | circ-0000607 |
| stroke-25  | 26.92085648 | 27.01782417 | circ-0000607 |
| stroke-25  | 26.91500854 | 27.01782417 | circ-0000607 |
| stroke-25  | 27.21760941 | 27.01782417 | circ-0000607 |
| stroke-26  | 30.30896759 | 30.4726696  | circ-0000607 |
| stroke-26  | 30.54724693 | 30.4726696  | circ-0000607 |
| stroke-26  | 30.56179428 | 30.4726696  | circ-0000607 |
| stroke-27  | 26.89507675 | 27.0796299  | circ-0000607 |
| stroke-27  | 27.39301491 | 27.0796299  | circ-0000607 |
| stroke-27  | 26.95079422 | 27.0796299  | circ-0000607 |
| stroke-28  | 30.1125412  | 29.84586143 | circ-0000607 |
| stroke-28  | 29.47126198 | 29.84586143 | circ-0000607 |
| stroke-28  | 29.95377922 | 29.84586143 | circ-0000607 |
| stroke-29  | 27.34066391 | 27.41553307 | circ-0000607 |
| stroke-29  | 27.51224709 | 27.41553307 | circ-0000607 |
| stroke-29  | 27.39368439 | 27.41553307 | circ-0000607 |
| stroke-30  | 26.21185112 | 26.31738091 | circ-0000607 |
| stroke-30  | 26.2661972  | 26.31738091 | circ-0000607 |
| stroke-30  | 26.47409248 | 26.31738091 | circ-0000607 |

|           |             |             |              |
|-----------|-------------|-------------|--------------|
| stroke-31 | 25.87304497 | 26.08994865 | circ-0000607 |
| stroke-31 | 26.46668816 | 26.08994865 | circ-0000607 |
| stroke-31 | 25.93010712 | 26.08994865 | circ-0000607 |
| stroke-32 | 28.64920807 | 27.4141407  | circ-0000607 |
| stroke-32 | 28.16283798 | 27.4141407  | circ-0000607 |
| stroke-32 | 25.43037987 | 27.4141407  | circ-0000607 |

| sample     | $\Delta CT$ |             | $\Delta\Delta CT$ | RQ          |
|------------|-------------|-------------|-------------------|-------------|
| control-1  | 1.159088135 | 5.444320679 | 4.285232544       | 19.49770675 |
| control-1  | 1.159088135 | 5.444320679 | 4.285232544       | 19.49770675 |
| control-1  | 1.159088135 | 5.444320679 | 4.285232544       | 19.49770675 |
| control-2  | 3.316962481 | 5.444320679 | 2.127358198       | 4.369166843 |
| control-2  | 3.316962481 | 5.444320679 | 2.127358198       | 4.369166843 |
| control-2  | 3.316962481 | 5.444320679 | 2.127358198       | 4.369166843 |
| control-3  | 2.957790375 | 5.444320679 | 2.486530304       | 5.604284921 |
| control-3  | 2.957790375 | 5.444320679 | 2.486530304       | 5.604284921 |
| control-3  | 2.957790375 | 5.444320679 | 2.486530304       | 5.604284921 |
| control-4  | 1.94759047  | 5.444320679 | 3.496730208       | 11.28809562 |
| control-4  | 1.94759047  | 5.444320679 | 3.496730208       | 11.28809562 |
| control-4  | 1.94759047  | 5.444320679 | 3.496730208       | 11.28809562 |
| control-5  | 1.21680963  | 5.444320679 | 4.227511048       | 18.73301292 |
| control-5  | 1.21680963  | 5.444320679 | 4.227511048       | 18.73301292 |
| control-5  | 1.21680963  | 5.444320679 | 4.227511048       | 18.73301292 |
| control-6  | 2.191910982 | 5.444320679 | 3.252409697       | 9.529560616 |
| control-6  | 2.191910982 | 5.444320679 | 3.252409697       | 9.529560616 |
| control-6  | 2.191910982 | 5.444320679 | 3.252409697       | 9.529560616 |
| control-7  | 1.715688705 | 5.444320679 | 3.728631973       | 13.25653634 |
| control-7  | 1.715688705 | 5.444320679 | 3.728631973       | 13.25653634 |
| control-7  | 1.715688705 | 5.444320679 | 3.728631973       | 13.25653634 |
| control-8  | 1.6088835   | 5.444320679 | 3.835437179       | 14.27518145 |
| control-8  | 1.6088835   | 5.444320679 | 3.835437179       | 14.27518145 |
| control-8  | 1.6088835   | 5.444320679 | 3.835437179       | 14.27518145 |
| stroke-1   | 1.032819748 | 5.444320679 | 4.411500931       | 21.28110165 |
| stroke-1   | 1.032819748 | 5.444320679 | 4.411500931       | 21.28110165 |
| stroke-1   | 1.032819748 | 5.444320679 | 4.411500931       | 21.28110165 |
| stroke-2   | 2.931800842 | 5.444320679 | 2.512519836       | 5.70615856  |
| stroke-2   | 2.931800842 | 5.444320679 | 2.512519836       | 5.70615856  |
| stroke-2   | 2.931800842 | 5.444320679 | 2.512519836       | 5.70615856  |
| stroke-3   | 4.299304962 | 5.444320679 | 1.145015717       | 2.211485398 |
| stroke-3   | 4.299304962 | 5.444320679 | 1.145015717       | 2.211485398 |
| stroke-3   | 4.299304962 | 5.444320679 | 1.145015717       | 2.211485398 |
| stroke-4   | 4.337828159 | 5.444320679 | 1.106492519       | 2.153215207 |
| stroke-4   | 4.337828159 | 5.444320679 | 1.106492519       | 2.153215207 |
| stroke-4   | 4.337828159 | 5.444320679 | 1.106492519       | 2.153215207 |
| stroke-5   | 2.977560043 | 5.444320679 | 2.466760635       | 5.52801157  |
| stroke-5   | 2.977560043 | 5.444320679 | 2.466760635       | 5.52801157  |
| stroke-5   | 2.977560043 | 5.444320679 | 2.466760635       | 5.52801157  |
| stroke-6   | 3.602041245 | 5.444320679 | 1.842279434       | 3.585761254 |
| stroke-6   | 3.602041245 | 5.444320679 | 1.842279434       | 3.585761254 |
| stroke-6   | 3.602041245 | 5.444320679 | 1.842279434       | 3.585761254 |
| stroke-7   | 3.2048347   | 5.444320679 | 2.239485979       | 4.722287832 |
| stroke-7   | 3.2048347   | 5.444320679 | 2.239485979       | 4.722287832 |
| stroke-7   | 3.2048347   | 5.444320679 | 2.239485979       | 4.722287832 |
| stroke-8   | 2.392775774 | 5.444320679 | 3.051544905       | 8.290993018 |
| stroke-8   | 2.392775774 | 5.444320679 | 3.051544905       | 8.290993018 |
| stroke-8   | 2.392775774 | 5.444320679 | 3.051544905       | 8.290993018 |
| control-9  | 0.551420212 | 5.444320679 | 4.892900467       | 29.71048944 |
| control-9  | 0.551420212 | 5.444320679 | 4.892900467       | 29.71048944 |
| control-9  | 0.551420212 | 5.444320679 | 4.892900467       | 29.71048944 |
| control-10 | 3.780870438 | 5.444320679 | 1.663450241       | 3.167731906 |
| control-10 | 3.780870438 | 5.444320679 | 1.663450241       | 3.167731906 |
| control-10 | 3.780870438 | 5.444320679 | 1.663450241       | 3.167731906 |
| control-11 | 4.287632465 | 5.444320679 | 1.156688213       | 2.22945057  |
| control-11 | 4.287632465 | 5.444320679 | 1.156688213       | 2.22945057  |
| control-11 | 4.287632465 | 5.444320679 | 1.156688213       | 2.22945057  |

|            |              |             |             |             |
|------------|--------------|-------------|-------------|-------------|
| control-12 | 3.193278551  | 5.444320679 | 2.251042128 | 4.760265786 |
| control-12 | 3.193278551  | 5.444320679 | 2.251042128 | 4.760265786 |
| control-12 | 3.193278551  | 5.444320679 | 2.251042128 | 4.760265786 |
| control-13 | 2.395202637  | 5.444320679 | 3.049118042 | 8.277057857 |
| control-13 | 2.395202637  | 5.444320679 | 3.049118042 | 8.277057857 |
| control-13 | 2.395202637  | 5.444320679 | 3.049118042 | 8.277057857 |
| control-14 | 3.379905701  | 5.444320679 | 2.064414978 | 4.182643327 |
| control-14 | 3.379905701  | 5.444320679 | 2.064414978 | 4.182643327 |
| control-14 | 3.379905701  | 5.444320679 | 2.064414978 | 4.182643327 |
| control-15 | 2.856510162  | 5.444320679 | 2.587810516 | 6.011856263 |
| control-15 | 2.856510162  | 5.444320679 | 2.587810516 | 6.011856263 |
| control-15 | 2.856510162  | 5.444320679 | 2.587810516 | 6.011856263 |
| control-16 | 3.553512573  | 5.444320679 | 1.890808105 | 3.708428891 |
| control-16 | 3.553512573  | 5.444320679 | 1.890808105 | 3.708428891 |
| control-16 | 3.553512573  | 5.444320679 | 1.890808105 | 3.708428891 |
| stroke-9   | 5.356458187  | 5.444320679 | 0.087862492 | 1.062794371 |
| stroke-9   | 5.356458187  | 5.444320679 | 0.087862492 | 1.062794371 |
| stroke-9   | 5.356458187  | 5.444320679 | 0.087862492 | 1.062794371 |
| stroke-10  | 4.257435322  | 5.444320679 | 1.186885357 | 2.276607141 |
| stroke-10  | 4.257435322  | 5.444320679 | 1.186885357 | 2.276607141 |
| stroke-10  | 4.257435322  | 5.444320679 | 1.186885357 | 2.276607141 |
| stroke-11  | 5.294780731  | 5.444320679 | 0.149539948 | 1.109215704 |
| stroke-11  | 5.294780731  | 5.444320679 | 0.149539948 | 1.109215704 |
| stroke-11  | 5.294780731  | 5.444320679 | 0.149539948 | 1.109215704 |
| stroke-12  | 5.444320679  | 5.444320679 | 0           | 1           |
| stroke-12  | 5.444320679  | 5.444320679 | 0           | 1           |
| stroke-12  | 5.444320679  | 5.444320679 | 0           | 1           |
| stroke-13  | 3.859185457  | 5.444320679 | 1.585135221 | 3.000359184 |
| stroke-13  | 3.859185457  | 5.444320679 | 1.585135221 | 3.000359184 |
| stroke-13  | 3.859185457  | 5.444320679 | 1.585135221 | 3.000359184 |
| stroke-14  | 4.723216534  | 5.444320679 | 0.721104145 | 1.648443163 |
| stroke-14  | 4.723216534  | 5.444320679 | 0.721104145 | 1.648443163 |
| stroke-14  | 4.723216534  | 5.444320679 | 0.721104145 | 1.648443163 |
| stroke-15  | 4.129009247  | 5.444320679 | 1.315311432 | 2.48856045  |
| stroke-15  | 4.129009247  | 5.444320679 | 1.315311432 | 2.48856045  |
| stroke-15  | 4.129009247  | 5.444320679 | 1.315311432 | 2.48856045  |
| stroke-16  | 4.136184692  | 5.444320679 | 1.308135986 | 2.476213975 |
| stroke-16  | 4.136184692  | 5.444320679 | 1.308135986 | 2.476213975 |
| stroke-16  | 4.136184692  | 5.444320679 | 1.308135986 | 2.476213975 |
| control-17 | 2.182820082  | 5.444320679 | 3.261500597 | 9.589799133 |
| control-17 | 2.182820082  | 5.444320679 | 3.261500597 | 9.589799133 |
| control-17 | 2.182820082  | 5.444320679 | 3.261500597 | 9.589799133 |
| control-18 | 1.501769423  | 5.444320679 | 3.942551255 | 15.37539165 |
| control-18 | 1.501769423  | 5.444320679 | 3.942551255 | 15.37539165 |
| control-18 | 1.501769423  | 5.444320679 | 3.942551255 | 15.37539165 |
| control-19 | 2.002012968  | 5.444320679 | 3.442307711 | 10.87020852 |
| control-19 | 2.002012968  | 5.444320679 | 3.442307711 | 10.87020852 |
| control-19 | 2.002012968  | 5.444320679 | 3.442307711 | 10.87020852 |
| control-20 | 2.759721041  | 5.444320679 | 2.684599638 | 6.429023561 |
| control-20 | 2.759721041  | 5.444320679 | 2.684599638 | 6.429023561 |
| control-20 | 2.759721041  | 5.444320679 | 2.684599638 | 6.429023561 |
| control-21 | -0.350158691 | 5.444320679 | 5.79447937  | 55.50244302 |
| control-21 | -0.350158691 | 5.444320679 | 5.79447937  | 55.50244302 |
| control-21 | -0.350158691 | 5.444320679 | 5.79447937  | 55.50244302 |
| control-22 | 2.205619812  | 5.444320679 | 3.238700867 | 9.439437339 |
| control-22 | 2.205619812  | 5.444320679 | 3.238700867 | 9.439437339 |
| control-22 | 2.205619812  | 5.444320679 | 3.238700867 | 9.439437339 |
| control-23 | -9.395401001 | 5.444320679 | 14.83972168 | 29322.52417 |
| control-23 | -9.395401001 | 5.444320679 | 14.83972168 | 29322.52417 |
| control-23 | -9.395401001 | 5.444320679 | 14.83972168 | 29322.52417 |
| control-24 | 1.66919899   | 5.444320679 | 3.775121689 | 13.69067515 |
| control-24 | 1.66919899   | 5.444320679 | 3.775121689 | 13.69067515 |
| control-24 | 1.66919899   | 5.444320679 | 3.775121689 | 13.69067515 |
| stroke-17  | 1.944433808  | 5.444320679 | 3.49988687  | 11.31282136 |
| stroke-17  | 1.944433808  | 5.444320679 | 3.49988687  | 11.31282136 |

|            |             |             |             |             |
|------------|-------------|-------------|-------------|-------------|
| stroke-17  | 1.944433808 | 5.444320679 | 3.49988687  | 11.31282136 |
| stroke-18  | 4.431950092 | 5.444320679 | 1.012370586 | 2.017223009 |
| stroke-18  | 4.431950092 | 5.444320679 | 1.012370586 | 2.017223009 |
| stroke-18  | 4.431950092 | 5.444320679 | 1.012370586 | 2.017223009 |
| stroke-19  | 3.583724976 | 5.444320679 | 1.860595703 | 3.631575825 |
| stroke-19  | 3.583724976 | 5.444320679 | 1.860595703 | 3.631575825 |
| stroke-19  | 3.583724976 | 5.444320679 | 1.860595703 | 3.631575825 |
| stroke-20  | 1.247179627 | 5.444320679 | 4.197141051 | 18.34278825 |
| stroke-20  | 1.247179627 | 5.444320679 | 4.197141051 | 18.34278825 |
| stroke-20  | 1.247179627 | 5.444320679 | 4.197141051 | 18.34278825 |
| stroke-21  | 3.486478806 | 5.444320679 | 1.957841873 | 3.884804164 |
| stroke-21  | 3.486478806 | 5.444320679 | 1.957841873 | 3.884804164 |
| stroke-21  | 3.486478806 | 5.444320679 | 1.957841873 | 3.884804164 |
| stroke-22  | 4.765616894 | 5.444320679 | 0.678703785 | 1.600700931 |
| stroke-22  | 4.765616894 | 5.444320679 | 0.678703785 | 1.600700931 |
| stroke-22  | 4.765616894 | 5.444320679 | 0.678703785 | 1.600700931 |
| stroke-23  | 4.387813568 | 5.444320679 | 1.056507111 | 2.079889828 |
| stroke-23  | 4.387813568 | 5.444320679 | 1.056507111 | 2.079889828 |
| stroke-23  | 4.387813568 | 5.444320679 | 1.056507111 | 2.079889828 |
| stroke-24  | 1.572210908 | 5.444320679 | 3.872109771 | 14.64270077 |
| stroke-24  | 1.572210908 | 5.444320679 | 3.872109771 | 14.64270077 |
| stroke-24  | 1.572210908 | 5.444320679 | 3.872109771 | 14.64270077 |
| control-25 | 2.652983904 | 5.444320679 | 2.791336775 | 6.922709335 |
| control-25 | 2.652983904 | 5.444320679 | 2.791336775 | 6.922709335 |
| control-25 | 2.652983904 | 5.444320679 | 2.791336775 | 6.922709335 |
| control-26 | 2.729892015 | 5.444320679 | 2.714428663 | 6.563333142 |
| control-26 | 2.729892015 | 5.444320679 | 2.714428663 | 6.563333142 |
| control-26 | 2.729892015 | 5.444320679 | 2.714428663 | 6.563333142 |
| control-27 | 3.077882767 | 5.444320679 | 2.366437912 | 5.156663525 |
| control-27 | 3.077882767 | 5.444320679 | 2.366437912 | 5.156663525 |
| control-27 | 3.077882767 | 5.444320679 | 2.366437912 | 5.156663525 |
| control-28 | 1.738283753 | 5.444320679 | 3.706036925 | 13.05053391 |
| control-28 | 1.738283753 | 5.444320679 | 3.706036925 | 13.05053391 |
| control-28 | 1.738283753 | 5.444320679 | 3.706036925 | 13.05053391 |
| control-29 | 2.766789198 | 5.444320679 | 2.677531481 | 6.39760305  |
| control-29 | 2.766789198 | 5.444320679 | 2.677531481 | 6.39760305  |
| control-29 | 2.766789198 | 5.444320679 | 2.677531481 | 6.39760305  |
| control-30 | 2.385864258 | 5.444320679 | 3.058456421 | 8.330807956 |
| control-30 | 2.385864258 | 5.444320679 | 3.058456421 | 8.330807956 |
| control-30 | 2.385864258 | 5.444320679 | 3.058456421 | 8.330807956 |
| control-31 | 2.589410782 | 5.444320679 | 2.854909897 | 7.234583172 |
| control-31 | 2.589410782 | 5.444320679 | 2.854909897 | 7.234583172 |
| control-31 | 2.589410782 | 5.444320679 | 2.854909897 | 7.234583172 |
| control-32 | 1.14564383  | 5.444320679 | 4.298676848 | 19.68025281 |
| control-32 | 1.14564383  | 5.444320679 | 4.298676848 | 19.68025281 |
| control-32 | 1.14564383  | 5.444320679 | 4.298676848 | 19.68025281 |
| stroke-25  | 2.993227005 | 5.444320679 | 2.451093674 | 5.468304851 |
| stroke-25  | 2.993227005 | 5.444320679 | 2.451093674 | 5.468304851 |
| stroke-25  | 2.993227005 | 5.444320679 | 2.451093674 | 5.468304851 |
| stroke-26  | 2.326253176 | 5.444320679 | 3.118067503 | 8.682241203 |
| stroke-26  | 2.326253176 | 5.444320679 | 3.118067503 | 8.682241203 |
| stroke-26  | 2.326253176 | 5.444320679 | 3.118067503 | 8.682241203 |
| stroke-27  | 2.365280867 | 5.444320679 | 3.079039812 | 8.450518197 |
| stroke-27  | 2.365280867 | 5.444320679 | 3.079039812 | 8.450518197 |
| stroke-27  | 2.365280867 | 5.444320679 | 3.079039812 | 8.450518197 |
| stroke-28  | 3.071371078 | 5.444320679 | 2.3729496   | 5.179991032 |
| stroke-28  | 3.071371078 | 5.444320679 | 2.3729496   | 5.179991032 |
| stroke-28  | 3.071371078 | 5.444320679 | 2.3729496   | 5.179991032 |
| stroke-29  | 2.30348587  | 5.444320679 | 3.140834808 | 8.820343299 |
| stroke-29  | 2.30348587  | 5.444320679 | 3.140834808 | 8.820343299 |
| stroke-29  | 2.30348587  | 5.444320679 | 3.140834808 | 8.820343299 |
| stroke-30  | 2.580812454 | 5.444320679 | 2.863508224 | 7.277829356 |
| stroke-30  | 2.580812454 | 5.444320679 | 2.863508224 | 7.277829356 |
| stroke-30  | 2.580812454 | 5.444320679 | 2.863508224 | 7.277829356 |
| stroke-31  | 2.404986143 | 5.444320679 | 3.039334536 | 8.221117627 |

|           |             |             |             |             |
|-----------|-------------|-------------|-------------|-------------|
| stroke-31 | 2.404986143 | 5.444320679 | 3.039334536 | 8.221117627 |
| stroke-31 | 2.404986143 | 5.444320679 | 3.039334536 | 8.221117627 |
| stroke-32 | 1.697722077 | 5.444320679 | 3.746598601 | 13.42265911 |
| stroke-32 | 1.697722077 | 5.444320679 | 3.746598601 | 13.42265911 |
| stroke-32 | 1.697722077 | 5.444320679 | 3.746598601 | 13.42265911 |

| sample     | RQ                      | sample    | RQ          |
|------------|-------------------------|-----------|-------------|
| control-1  | 19.49770675             | stroke-1  | 21.28110165 |
| control-2  | 4.369166843             | stroke-2  | 5.70615856  |
| control-3  | 5.604284921             | stroke-3  | 2.211485398 |
| control-4  | 11.28809562             | stroke-4  | 2.153215207 |
| control-5  | 18.73301292             | stroke-5  | 5.52801157  |
| control-6  | 9.529560616             | stroke-6  | 3.585761254 |
| control-7  | 13.25653634             | stroke-7  | 4.722287832 |
| control-8  | 14.27518145             | stroke-8  | 8.290993018 |
| control-9  | 29.71048944             | stroke-9  | 1.062794371 |
| control-10 | 3.167731906             | stroke-10 | 2.276607141 |
| control-11 | 2.22945057              | stroke-11 | 1.109215704 |
| control-12 | 4.760265786             | stroke-12 | 1           |
| control-13 | 8.277057857             | stroke-13 | 3.000359184 |
| control-14 | 4.182643327             | stroke-14 | 1.648443163 |
| control-15 | 6.011856263             | stroke-15 | 2.48856045  |
| control-16 | 3.708428891             | stroke-16 | 2.476213975 |
| control-17 | 9.589799133             | stroke-17 | 11.31282136 |
| control-18 | 15.37539165             | stroke-18 | 2.017223009 |
| control-19 | 10.87020852             | stroke-19 | 3.631575825 |
| control-20 | 6.429023561             | stroke-20 | 18.34278825 |
| control-21 | 55.50244302             | stroke-21 | 3.884804164 |
| control-22 | 9.439437339             | stroke-22 | 1.600700931 |
| control-23 | 29322.5241668528 (29.3) | stroke-23 | 2.079889828 |
| control-24 | 13.69067515             | stroke-24 | 14.64270077 |
| control-25 | 6.922709335             | stroke-25 | 5.468304851 |
| control-26 | 6.563333142             | stroke-26 | 8.682241203 |
| control-27 | 5.156663525             | stroke-27 | 8.450518197 |
| control-28 | 13.05053391             | stroke-28 | 5.179991032 |
| control-29 | 6.39760305              | stroke-29 | 8.820343299 |
| control-30 | 8.330807956             | stroke-30 | 7.277829356 |
| control-31 | 7.234583172             | stroke-31 | 8.221117627 |
| control-32 | 19.68025281             | stroke-32 | 13.42265911 |

raw Ct data circRNA-0002465

| Sample Name | Raw Ct      | Ct Mean     |       |
|-------------|-------------|-------------|-------|
| control-1   | 28.22517967 | 28.5207653  | GAPDH |
| control-1   | 28.78348351 | 28.5207653  | GAPDH |
| control-1   | 28.55363274 | 28.5207653  | GAPDH |
| control-2   | 28.53512192 | 28.58434296 | GAPDH |
| control-2   | 28.67719078 | 28.58434296 | GAPDH |
| control-2   | 28.54071617 | 28.58434296 | GAPDH |
| control-3   | 24.60255814 | 24.6583004  | GAPDH |
| control-3   | 24.68700218 | 24.6583004  | GAPDH |
| control-3   | 24.68533897 | 24.6583004  | GAPDH |
| control-4   | 24.88133621 | 24.9044857  | GAPDH |
| control-4   | 24.88339806 | 24.9044857  | GAPDH |
| control-4   | 24.94872665 | 24.9044857  | GAPDH |
| control-5   | 26.07564163 | 25.99196815 | GAPDH |
| control-5   | 25.96985626 | 25.99196815 | GAPDH |
| control-5   | 25.93041039 | 25.99196815 | GAPDH |
| control-6   | 24.87948418 | 24.92822075 | GAPDH |
| control-6   | 25.03196144 | 24.92822075 | GAPDH |
| control-6   | 24.87321091 | 24.92822075 | GAPDH |
| control-7   | 24.938797   | 25.27075768 | GAPDH |
| control-7   | 25.3934288  | 25.27075768 | GAPDH |

|           |             |             |              |
|-----------|-------------|-------------|--------------|
| control-7 | 25.48004532 | 25.27075768 | GAPDH        |
| control-8 | 24.70462418 | 24.73781395 | GAPDH        |
| control-8 | 24.66288757 | 24.73781395 | GAPDH        |
| control-8 | 24.84592438 | 24.73781395 | GAPDH        |
| stroke-1  | 23.93505478 | 24.06849098 | GAPDH        |
| stroke-1  | 24.06428909 | 24.06849098 | GAPDH        |
| stroke-1  | 24.20613098 | 24.06849098 | GAPDH        |
| stroke-2  | 25.20811081 | 25.35446739 | GAPDH        |
| stroke-2  | 25.35016632 | 25.35446739 | GAPDH        |
| stroke-2  | 25.50512886 | 25.35446739 | GAPDH        |
| stroke-3  | 23.91085052 | 24.03520775 | GAPDH        |
| stroke-3  | 24.16567802 | 24.03520775 | GAPDH        |
| stroke-3  | 24.02909088 | 24.03520775 | GAPDH        |
| stroke-4  | 23.28930473 | 23.68898201 | GAPDH        |
| stroke-4  | 23.87956429 | 23.68898201 | GAPDH        |
| stroke-4  | 23.8980751  | 23.68898201 | GAPDH        |
| stroke-5  | 23.8413868  | 24.05538177 | GAPDH        |
| stroke-5  | 24.12804222 | 24.05538177 | GAPDH        |
| stroke-5  | 24.1967144  | 24.05538177 | GAPDH        |
| stroke-6  | 24.98008919 | 24.82170296 | GAPDH        |
| stroke-6  | 24.84412193 | 24.82170296 | GAPDH        |
| stroke-6  | 24.64089775 | 24.82170296 | GAPDH        |
| stroke-7  | 23.23210526 | 23.64855385 | GAPDH        |
| stroke-7  | 23.74567032 | 23.64855385 | GAPDH        |
| stroke-7  | 23.96788406 | 23.64855385 | GAPDH        |
| stroke-8  | 23.71293068 | 23.82270813 | GAPDH        |
| stroke-8  | 23.80846214 | 23.82270813 | GAPDH        |
| stroke-8  | 23.94673538 | 23.82270813 | GAPDH        |
| control-1 | 32.56254959 | 31.86647987 | circ-0002465 |
| control-1 | 31.12167168 | 31.86647987 | circ-0002465 |
| control-1 | 31.91522026 | 31.86647987 | circ-0002465 |
| control-2 | 31.7302475  | 31.79043579 | circ-0002465 |
| control-2 | 31.4820919  | 31.79043579 | circ-0002465 |
| control-2 | 32.15896606 | 31.79043579 | circ-0002465 |
| control-3 | 30.06734467 | 29.73313904 | circ-0002465 |
| control-3 | 29.22234917 | 29.73313904 | circ-0002465 |
| control-3 | 29.90972328 | 29.73313904 | circ-0002465 |
| control-4 | 27.47392845 | 27.44553947 | circ-0002465 |
| control-4 | 27.34608078 | 27.44553947 | circ-0002465 |
| control-4 | 27.51660728 | 27.44553947 | circ-0002465 |
| control-5 | 30.56390572 | 30.46040535 | circ-0002465 |
| control-5 | 30.57001686 | 30.46040535 | circ-0002465 |
| control-5 | 30.24729919 | 30.46040535 | circ-0002465 |
| control-6 | 29.00938034 | 29.14421844 | circ-0002465 |
| control-6 | 29.16273117 | 29.14421844 | circ-0002465 |
| control-6 | 29.26054382 | 29.14421844 | circ-0002465 |
| control-7 | 29.80199623 | 29.8035717  | circ-0002465 |
| control-7 | 30.09585953 | 29.8035717  | circ-0002465 |
| control-7 | 29.51285934 | 29.8035717  | circ-0002465 |
| control-8 | 29.44866753 | 29.22708893 | circ-0002465 |
| control-8 | 29.07068253 | 29.22708893 | circ-0002465 |
| control-8 | 29.16191483 | 29.22708893 | circ-0002465 |
| stroke-1  | 28.58267593 | 28.66102028 | circ-0002465 |
| stroke-1  | 28.76257706 | 28.66102028 | circ-0002465 |
| stroke-1  | 28.63781166 | 28.66102028 | circ-0002465 |
| stroke-2  | 31.43391991 | 31.13836479 | circ-0002465 |
| stroke-2  | 31.16127396 | 31.13836479 | circ-0002465 |
| stroke-2  | 30.81989861 | 31.13836479 | circ-0002465 |
| stroke-3  | 27.09321976 | 27.08148766 | circ-0002465 |
| stroke-3  | 27.10632515 | 27.08148766 | circ-0002465 |
| stroke-3  | 27.04491425 | 27.08148766 | circ-0002465 |
| stroke-4  | 28.97231674 | 28.90931129 | circ-0002465 |
| stroke-4  | 28.94058609 | 28.90931129 | circ-0002465 |
| stroke-4  | 28.81503868 | 28.90931129 | circ-0002465 |
| stroke-5  | 28.9219265  | 28.73053741 | circ-0002465 |

|            |             |             |              |
|------------|-------------|-------------|--------------|
| stroke-5   | 28.53737259 | 28.73053741 | circ-0002465 |
| stroke-5   | 28.73231506 | 28.73053741 | circ-0002465 |
| stroke-6   | 29.31085014 | 29.22802734 | circ-0002465 |
| stroke-6   | 29.4238472  | 29.22802734 | circ-0002465 |
| stroke-6   | 28.94938087 | 29.22802734 | circ-0002465 |
| stroke-7   | 28.36186028 | 28.46089363 | circ-0002465 |
| stroke-7   | 28.50704002 | 28.46089363 | circ-0002465 |
| stroke-7   | 28.51378059 | 28.46089363 | circ-0002465 |
| stroke-8   | 28.05480576 | 27.00875282 | circ-0002465 |
| stroke-8   | 28.20303917 | 27.00875282 | circ-0002465 |
| stroke-8   | 24.76842117 | 27.00875282 | circ-0002465 |
| control-9  | 28.24897766 | 28.61803246 | GAPDH        |
| control-9  | 28.63478661 | 28.61803246 | GAPDH        |
| control-9  | 28.9703331  | 28.61803246 | GAPDH        |
| control-10 | 28.25745773 | 28.01657677 | GAPDH        |
| control-10 | 27.79316902 | 28.01657677 | GAPDH        |
| control-10 | 27.99910164 | 28.01657677 | GAPDH        |
| control-11 | 24.97808266 | 25.19816017 | GAPDH        |
| control-11 | 25.34111404 | 25.19816017 | GAPDH        |
| control-11 | 25.27528572 | 25.19816017 | GAPDH        |
| control-12 | 24.94738579 | 24.6295166  | GAPDH        |
| control-12 | 24.21150589 | 24.6295166  | GAPDH        |
| control-12 | 24.72965622 | 24.6295166  | GAPDH        |
| control-13 | 29.87628746 | 29.13039398 | GAPDH        |
| control-13 | 28.92920303 | 29.13039398 | GAPDH        |
| control-13 | 28.58568764 | 29.13039398 | GAPDH        |
| control-14 | 23.95876884 | 24.14717293 | GAPDH        |
| control-14 | 23.99143791 | 24.14717293 | GAPDH        |
| control-14 | 24.49131012 | 24.14717293 | GAPDH        |
| control-15 | 24.61626053 | 25.06131935 | GAPDH        |
| control-15 | 25.21447182 | 25.06131935 | GAPDH        |
| control-15 | 25.35322189 | 25.06131935 | GAPDH        |
| control-16 | 25.26622963 | 25.04005241 | GAPDH        |
| control-16 | 24.3350544  | 25.04005241 | GAPDH        |
| control-16 | 25.51887131 | 25.04005241 | GAPDH        |
| stroke-9   | 23.60490608 | 22.87086487 | GAPDH        |
| stroke-9   | 22.39182663 | 22.87086487 | GAPDH        |
| stroke-9   | 22.6158638  | 22.87086487 | GAPDH        |
| stroke-10  | 23.67581177 | 24.35485649 | GAPDH        |
| stroke-10  | 25.41589355 | 24.35485649 | GAPDH        |
| stroke-10  | 23.97286415 | 24.35485649 | GAPDH        |
| stroke-11  | 23.23627853 | 23.74555969 | GAPDH        |
| stroke-11  | 24.85750389 | 23.74555969 | GAPDH        |
| stroke-11  | 23.14290237 | 23.74555969 | GAPDH        |
| stroke-12  | 23.24978828 | 23.20983696 | GAPDH        |
| stroke-12  | 23.83935356 | 23.20983696 | GAPDH        |
| stroke-12  | 22.54037094 | 23.20983696 | GAPDH        |
| stroke-13  | 24.32772064 | 24.08715248 | GAPDH        |
| stroke-13  | 23.33868027 | 24.08715248 | GAPDH        |
| stroke-13  | 24.59505844 | 24.08715248 | GAPDH        |
| stroke-14  | 22.90438843 | 22.98325539 | GAPDH        |
| stroke-14  | 23.27542686 | 22.98325539 | GAPDH        |
| stroke-14  | 22.76995659 | 22.98325539 | GAPDH        |
| stroke-15  | 22.63058853 | 23.31741905 | GAPDH        |
| stroke-15  | 24.12521553 | 23.31741905 | GAPDH        |
| stroke-15  | 23.19645119 | 23.31741905 | GAPDH        |
| stroke-16  | 25.02811432 | 25.08237267 | GAPDH        |
| stroke-16  | 25.11139297 | 25.08237267 | GAPDH        |
| stroke-16  | 25.10761261 | 25.08237267 | GAPDH        |
| control-9  | 31.45966911 | 31.48971558 | circ-0002465 |
| control-9  | 31.14132309 | 31.48971558 | circ-0002465 |
| control-9  | 31.86815071 | 31.48971558 | circ-0002465 |
| control-10 | 30.9251442  | 31.16489601 | circ-0002465 |
| control-10 | 31.57998657 | 31.16489601 | circ-0002465 |
| control-10 | 30.98956108 | 31.16489601 | circ-0002465 |

|            |             |             |              |
|------------|-------------|-------------|--------------|
| control-11 | 29.98975182 | 30.38703728 | circ-0002465 |
| control-11 | 30.20396042 | 30.38703728 | circ-0002465 |
| control-11 | 30.96739578 | 30.38703728 | circ-0002465 |
| control-12 | 28.88368988 | 28.81193542 | circ-0002465 |
| control-12 | 28.80916595 | 28.81193542 | circ-0002465 |
| control-12 | 28.74294662 | 28.81193542 | circ-0002465 |
| control-13 | 32.39952469 | 31.89770508 | circ-0002465 |
| control-13 | 31.95591927 | 31.89770508 | circ-0002465 |
| control-13 | 31.337677   | 31.89770508 | circ-0002465 |
| control-14 | 29.39094734 | 29.10651588 | circ-0002465 |
| control-14 | 28.59114075 | 29.10651588 | circ-0002465 |
| control-14 | 29.33746338 | 29.10651588 | circ-0002465 |
| control-15 | 29.78352356 | 29.67912483 | circ-0002465 |
| control-15 | 29.53899002 | 29.67912483 | circ-0002465 |
| control-15 | 29.71486473 | 29.67912483 | circ-0002465 |
| control-16 | 30.26912308 | 30.44482422 | circ-0002465 |
| control-16 | 30.65041161 | 30.44482422 | circ-0002465 |
| control-16 | 30.4149437  | 30.44482422 | circ-0002465 |
| stroke-9   | 27.9244175  | 26.85712242 | circ-0002465 |
| stroke-9   | 26.1763382  | 26.85712242 | circ-0002465 |
| stroke-9   | 26.47060776 | 26.85712242 | circ-0002465 |
| stroke-10  | 29.37658501 | 28.92365074 | circ-0002465 |
| stroke-10  | 29.45667648 | 28.92365074 | circ-0002465 |
| stroke-10  | 27.93769073 | 28.92365074 | circ-0002465 |
| stroke-11  | 30.81083679 | 30.54960632 | circ-0002465 |
| stroke-11  | 30.84845161 | 30.54960632 | circ-0002465 |
| stroke-11  | 29.98952866 | 30.54960632 | circ-0002465 |
| stroke-12  | 28.30636978 | 29.03059959 | circ-0002465 |
| stroke-12  | 29.76253128 | 29.03059959 | circ-0002465 |
| stroke-12  | 29.02289581 | 29.03059959 | circ-0002465 |
| stroke-13  | 29.00582695 | 29.04254723 | circ-0002465 |
| stroke-13  | 29.1603241  | 29.04254723 | circ-0002465 |
| stroke-13  | 28.96149063 | 29.04254723 | circ-0002465 |
| stroke-14  | 27.57000542 | 27.57513237 | circ-0002465 |
| stroke-14  | 27.51561546 | 27.57513237 | circ-0002465 |
| stroke-14  | 27.63977242 | 27.57513237 | circ-0002465 |
| stroke-15  | 28.3933754  | 28.52927208 | circ-0002465 |
| stroke-15  | 28.94805527 | 28.52927208 | circ-0002465 |
| stroke-15  | 28.24637985 | 28.52927208 | circ-0002465 |
| stroke-16  | 29.96845055 | 30.08955574 | circ-0002465 |
| stroke-16  | 29.92323112 | 30.08955574 | circ-0002465 |
| stroke-16  | 30.37698936 | 30.08955574 | circ-0002465 |
| control-17 | 28.94908714 | 29.19761086 | GAPDH        |
| control-17 | 29.33703041 | 29.19761086 | GAPDH        |
| control-17 | 29.30671883 | 29.19761086 | GAPDH        |
| control-18 | 27.77310371 | 27.81768799 | GAPDH        |
| control-18 | 28.18780518 | 27.81768799 | GAPDH        |
| control-18 | 27.49215698 | 27.81768799 | GAPDH        |
| control-19 | 25.48110962 | 25.3298645  | GAPDH        |
| control-19 | 25.56259155 | 25.3298645  | GAPDH        |
| control-19 | 24.94589424 | 25.3298645  | GAPDH        |
| control-20 | 24.25027466 | 24.46928406 | GAPDH        |
| control-20 | 24.35326004 | 24.46928406 | GAPDH        |
| control-20 | 24.80431747 | 24.46928406 | GAPDH        |
| control-21 | 28.83850479 | 29.44898033 | GAPDH        |
| control-21 | 29.55249214 | 29.44898033 | GAPDH        |
| control-21 | 29.95594215 | 29.44898033 | GAPDH        |
| control-22 | 24.11787415 | 23.97958374 | GAPDH        |
| control-22 | 24.5291481  | 23.97958374 | GAPDH        |
| control-22 | 23.29173279 | 23.97958374 | GAPDH        |
| control-23 | 25.42292595 | 25.70676994 | GAPDH        |
| control-23 | 25.8006916  | 25.70676994 | GAPDH        |
| control-23 | 25.89668846 | 25.70676994 | GAPDH        |
| control-24 | 24.67227364 | 25.03015327 | GAPDH        |
| control-24 | 25.13502121 | 25.03015327 | GAPDH        |

|            |             |             |              |
|------------|-------------|-------------|--------------|
| control-24 | 25.28316689 | 25.03015327 | GAPDH        |
| stroke-17  | 23.73663902 | 23.6374054  | GAPDH        |
| stroke-17  | 23.37400818 | 23.6374054  | GAPDH        |
| stroke-17  | 23.80156708 | 23.6374054  | GAPDH        |
| stroke-18  | 25.80944824 | 25.36976051 | GAPDH        |
| stroke-18  | 25.16739082 | 25.36976051 | GAPDH        |
| stroke-18  | 25.13244247 | 25.36976051 | GAPDH        |
| stroke-19  | 25.1457386  | 25.50319862 | GAPDH        |
| stroke-19  | 25.46788025 | 25.50319862 | GAPDH        |
| stroke-19  | 25.89597893 | 25.50319862 | GAPDH        |
| stroke-20  | 23.80775452 | 23.75936317 | GAPDH        |
| stroke-20  | 24.3048172  | 23.75936317 | GAPDH        |
| stroke-20  | 23.1655159  | 23.75936317 | GAPDH        |
| stroke-21  | 24.44375801 | 24.54026031 | GAPDH        |
| stroke-21  | 24.70052719 | 24.54026031 | GAPDH        |
| stroke-21  | 24.47649956 | 24.54026031 | GAPDH        |
| stroke-22  | 23.68344688 | 22.18631554 | GAPDH        |
| stroke-22  | 21.7127037  | 22.18631554 | GAPDH        |
| stroke-22  | 21.16279602 | 22.18631554 | GAPDH        |
| stroke-23  | 23.90446663 | 23.97942352 | GAPDH        |
| stroke-23  | 23.16567993 | 23.97942352 | GAPDH        |
| stroke-23  | 24.8681221  | 23.97942352 | GAPDH        |
| stroke-24  | 24.87950325 | 25.03767967 | GAPDH        |
| stroke-24  | 25.12272453 | 25.03767967 | GAPDH        |
| stroke-24  | 25.11081123 | 25.03767967 | GAPDH        |
| control-17 | 33.19500732 | 33.03007126 | circ-0002465 |
| control-17 | 31.63611603 | 33.03007126 | circ-0002465 |
| control-17 | 34.25908279 | 33.03007126 | circ-0002465 |
| control-18 | 31.93916893 | 31.77598    | circ-0002465 |
| control-18 | 31.96018028 | 31.77598    | circ-0002465 |
| control-18 | 31.42859459 | 31.77598    | circ-0002465 |
| control-19 | 28.21405602 | 28.97886086 | circ-0002465 |
| control-19 | 29.88322258 | 28.97886086 | circ-0002465 |
| control-19 | 28.83930206 | 28.97886086 | circ-0002465 |
| control-20 | 29.51506805 | 29.45559692 | circ-0002465 |
| control-20 | 28.98643494 | 29.45559692 | circ-0002465 |
| control-20 | 29.86528397 | 29.45559692 | circ-0002465 |
| control-21 | 33.74800873 | 34.29346848 | circ-0002465 |
| control-21 | 34.00082779 | 34.29346848 | circ-0002465 |
| control-21 | 35.13157272 | 34.29346848 | circ-0002465 |
| control-22 | 28.24772644 | 28.91924095 | circ-0002465 |
| control-22 | 29.47133446 | 28.91924095 | circ-0002465 |
| control-22 | 29.03866386 | 28.91924095 | circ-0002465 |
| control-23 | 29.12859344 | 29.40195656 | circ-0002465 |
| control-23 | 29.25438118 | 29.40195656 | circ-0002465 |
| control-23 | 29.82289314 | 29.40195656 | circ-0002465 |
| control-24 | 28.22966957 | 28.29116631 | circ-0002465 |
| control-24 | 27.88504982 | 28.29116631 | circ-0002465 |
| control-24 | 28.75877953 | 28.29116631 | circ-0002465 |
| stroke-17  | 29.08116531 | 28.89151573 | circ-0002465 |
| stroke-17  | 28.8964901  | 28.89151573 | circ-0002465 |
| stroke-17  | 28.69688988 | 28.89151573 | circ-0002465 |
| stroke-18  | 30.37239456 | 31.37583351 | circ-0002465 |
| stroke-18  | 31.32005882 | 31.37583351 | circ-0002465 |
| stroke-18  | 32.43505478 | 31.37583351 | circ-0002465 |
| stroke-19  | 29.32694054 | 30.13388062 | circ-0002465 |
| stroke-19  | 30.83299637 | 30.13388062 | circ-0002465 |
| stroke-19  | 30.24170113 | 30.13388062 | circ-0002465 |
| stroke-20  | 29.62601471 | 28.71315193 | circ-0002465 |
| stroke-20  | 28.10028458 | 28.71315193 | circ-0002465 |
| stroke-20  | 28.41316032 | 28.71315193 | circ-0002465 |
| stroke-21  | 28.2462368  | 28.50326538 | circ-0002465 |
| stroke-21  | 28.33555412 | 28.50326538 | circ-0002465 |
| stroke-21  | 28.92800522 | 28.50326538 | circ-0002465 |
| stroke-22  | 25.73388672 | 26.64194489 | circ-0002465 |

|            |             |             |              |
|------------|-------------|-------------|--------------|
| stroke-22  | 26.6782608  | 26.64194489 | circ-0002465 |
| stroke-22  | 27.51368523 | 26.64194489 | circ-0002465 |
| stroke-23  | 28.60551071 | 28.1728611  | circ-0002465 |
| stroke-23  | 28.55725288 | 28.1728611  | circ-0002465 |
| stroke-23  | 27.35581779 | 28.1728611  | circ-0002465 |
| stroke-24  | 29.12100983 | 29.1842289  | circ-0002465 |
| stroke-24  | 29.37849236 | 29.1842289  | circ-0002465 |
| stroke-24  | 29.05319023 | 29.1842289  | circ-0002465 |
| control-25 | 25.30481911 | 25.44786835 | GAPDH        |
| control-25 | 25.43247986 | 25.44786835 | GAPDH        |
| control-25 | 25.60630417 | 25.44786835 | GAPDH        |
| control-26 | 23.60297394 | 23.56755066 | GAPDH        |
| control-26 | 23.43074608 | 23.56755066 | GAPDH        |
| control-26 | 23.66893196 | 23.56755066 | GAPDH        |
| control-27 | 24.52764893 | 24.51243019 | GAPDH        |
| control-27 | 24.28105354 | 24.51243019 | GAPDH        |
| control-27 | 24.72859192 | 24.51243019 | GAPDH        |
| control-28 | 25.04073906 | 24.99892426 | GAPDH        |
| control-28 | 24.93611336 | 24.99892426 | GAPDH        |
| control-28 | 25.01992226 | 24.99892426 | GAPDH        |
| control-29 | 24.27246666 | 24.5294342  | GAPDH        |
| control-29 | 24.70700073 | 24.5294342  | GAPDH        |
| control-29 | 24.60883522 | 24.5294342  | GAPDH        |
| control-30 | 25.35090446 | 25.15704536 | GAPDH        |
| control-30 | 25.16349602 | 25.15704536 | GAPDH        |
| control-30 | 24.95673752 | 25.15704536 | GAPDH        |
| control-31 | 23.88335037 | 24.22380638 | GAPDH        |
| control-31 | 24.38490105 | 24.22380638 | GAPDH        |
| control-31 | 24.40316772 | 24.22380638 | GAPDH        |
| control-32 | 24.8608532  | 24.94484138 | GAPDH        |
| control-32 | 24.97536469 | 24.94484138 | GAPDH        |
| control-32 | 24.99830437 | 24.94484138 | GAPDH        |
| stroke-25  | 23.70881462 | 24.02713585 | GAPDH        |
| stroke-25  | 24.1415081  | 24.02713585 | GAPDH        |
| stroke-25  | 24.23108101 | 24.02713585 | GAPDH        |
| stroke-26  | 22.9226265  | 22.45311928 | GAPDH        |
| stroke-26  | 22.34535599 | 22.45311928 | GAPDH        |
| stroke-26  | 22.09137726 | 22.45311928 | GAPDH        |
| stroke-27  | 25.49575806 | 25.71344566 | GAPDH        |
| stroke-27  | 25.8449688  | 25.71344566 | GAPDH        |
| stroke-27  | 25.79960442 | 25.71344566 | GAPDH        |
| stroke-28  | 22.50871658 | 22.60425758 | GAPDH        |
| stroke-28  | 22.95963287 | 22.60425758 | GAPDH        |
| stroke-28  | 22.34441948 | 22.60425758 | GAPDH        |
| stroke-29  | 24.73519897 | 25.11142921 | GAPDH        |
| stroke-29  | 24.81212425 | 25.11142921 | GAPDH        |
| stroke-29  | 25.78696632 | 25.11142921 | GAPDH        |
| stroke-30  | 23.04039192 | 22.93328857 | GAPDH        |
| stroke-30  | 23.05605698 | 22.93328857 | GAPDH        |
| stroke-30  | 22.70341873 | 22.93328857 | GAPDH        |
| stroke-31  | 21.96428108 | 22.10832405 | GAPDH        |
| stroke-31  | 22.1443882  | 22.10832405 | GAPDH        |
| stroke-31  | 22.21630669 | 22.10832405 | GAPDH        |
| stroke-32  | 20.96019173 | 22.18644142 | GAPDH        |
| stroke-32  | 22.619627   | 22.18644142 | GAPDH        |
| stroke-32  | 22.97950935 | 22.18644142 | GAPDH        |
| control-25 | 27.86724091 | 26.90261078 | circ-0002465 |
| control-25 | 26.38318634 | 26.90261078 | circ-0002465 |
| control-25 | 26.45740318 | 26.90261078 | circ-0002465 |
| control-26 | 24.45399284 | 24.4001236  | circ-0002465 |
| control-26 | 24.22079277 | 24.4001236  | circ-0002465 |
| control-26 | 24.52558517 | 24.4001236  | circ-0002465 |
| control-27 | 26.99706841 | 27.32739449 | circ-0002465 |
| control-27 | 27.20311165 | 27.32739449 | circ-0002465 |
| control-27 | 27.7820015  | 27.32739449 | circ-0002465 |

|            |             |             |              |
|------------|-------------|-------------|--------------|
| control-28 | 27.32508659 | 26.9041748  | circ-0002465 |
| control-28 | 26.89035225 | 26.9041748  | circ-0002465 |
| control-28 | 26.49708176 | 26.9041748  | circ-0002465 |
| control-29 | 27.77741814 | 27.0975666  | circ-0002465 |
| control-29 | 26.73068619 | 27.0975666  | circ-0002465 |
| control-29 | 26.7845974  | 27.0975666  | circ-0002465 |
| control-30 | 27.13654709 | 27.03691673 | circ-0002465 |
| control-30 | 27.13302231 | 27.03691673 | circ-0002465 |
| control-30 | 26.84117317 | 27.03691673 | circ-0002465 |
| control-31 | 26.87272644 | 26.93076515 | circ-0002465 |
| control-31 | 26.98042297 | 26.93076515 | circ-0002465 |
| control-31 | 26.93914795 | 26.93076515 | circ-0002465 |
| control-32 | 26.52950859 | 26.41366005 | circ-0002465 |
| control-32 | 26.51651955 | 26.41366005 | circ-0002465 |
| control-32 | 26.1949501  | 26.41366005 | circ-0002465 |
| stroke-25  | 28.66191673 | 28.31859398 | circ-0002465 |
| stroke-25  | 27.89312553 | 28.31859398 | circ-0002465 |
| stroke-25  | 28.40073395 | 28.31859398 | circ-0002465 |
| stroke-26  | 26.37397194 | 26.60219574 | circ-0002465 |
| stroke-26  | 26.68183708 | 26.60219574 | circ-0002465 |
| stroke-26  | 26.75078201 | 26.60219574 | circ-0002465 |
| stroke-27  | 34.16732025 | 32.4129982  | circ-0002465 |
| stroke-27  | 36.09153748 | 32.4129982  | circ-0002465 |
| stroke-27  | 26.9801445  | 32.4129982  | circ-0002465 |
| stroke-28  | 25.57251358 | 25.5241642  | circ-0002465 |
| stroke-28  | 25.36157036 | 25.5241642  | circ-0002465 |
| stroke-28  | 25.63841248 | 25.5241642  | circ-0002465 |
| stroke-29  | 26.71012306 | 26.70905113 | circ-0002465 |
| stroke-29  | 26.66895485 | 26.70905113 | circ-0002465 |
| stroke-29  | 26.74807358 | 26.70905113 | circ-0002465 |
| stroke-30  | 27.10251427 | 26.88416481 | circ-0002465 |
| stroke-30  | 27.01667786 | 26.88416481 | circ-0002465 |
| stroke-30  | 26.53330612 | 26.88416481 | circ-0002465 |
| stroke-31  | 24.62226295 | 24.26831818 | circ-0002465 |
| stroke-31  | 23.29580879 | 24.26831818 | circ-0002465 |
| stroke-31  | 24.88688087 | 24.26831818 | circ-0002465 |
| stroke-32  | 24.11989403 | 24.8059864  | circ-0002465 |
| stroke-32  | 25.12437057 | 24.8059864  | circ-0002465 |
| stroke-32  | 25.17369652 | 24.8059864  | circ-0002465 |

| sample    | $\Delta CT$ |             | $\Delta\Delta CT$ | RQ          |
|-----------|-------------|-------------|-------------------|-------------|
| control-1 | 3.345715284 | 6.804044247 | 3.458328962       | 10.99159588 |
| control-1 | 3.345715284 | 6.804044247 | 3.458328962       | 10.99159588 |
| control-1 | 3.345715284 | 6.804044247 | 3.458328962       | 10.99159588 |
| control-2 | 3.206092119 | 6.804044247 | 3.597952127       | 12.10853254 |
| control-2 | 3.206092119 | 6.804044247 | 3.597952127       | 12.10853254 |
| control-2 | 3.206092119 | 6.804044247 | 3.597952127       | 12.10853254 |
| control-3 | 5.074839115 | 6.804044247 | 1.729205132       | 3.315450996 |
| control-3 | 5.074839115 | 6.804044247 | 1.729205132       | 3.315450996 |
| control-3 | 5.074839115 | 6.804044247 | 1.729205132       | 3.315450996 |
| control-4 | 2.541051865 | 6.804044247 | 4.262992382       | 19.19944074 |
| control-4 | 2.541051865 | 6.804044247 | 4.262992382       | 19.19944074 |
| control-4 | 2.541051865 | 6.804044247 | 4.262992382       | 19.19944074 |
| control-5 | 4.468437672 | 6.804044247 | 2.335606575       | 5.047631444 |
| control-5 | 4.468437672 | 6.804044247 | 2.335606575       | 5.047631444 |
| control-5 | 4.468437672 | 6.804044247 | 2.335606575       | 5.047631444 |
| control-6 | 4.215999603 | 6.804044247 | 2.588044643       | 6.012831973 |
| control-6 | 4.215999603 | 6.804044247 | 2.588044643       | 6.012831973 |
| control-6 | 4.215999603 | 6.804044247 | 2.588044643       | 6.012831973 |
| control-7 | 4.532814503 | 6.804044247 | 2.271229744       | 4.827344355 |
| control-7 | 4.532814503 | 6.804044247 | 2.271229744       | 4.827344355 |
| control-7 | 4.532814503 | 6.804044247 | 2.271229744       | 4.827344355 |
| control-8 | 4.489276409 | 6.804044247 | 2.314767838       | 4.975245918 |

|            |             |             |             |             |
|------------|-------------|-------------|-------------|-------------|
| control-8  | 4.489276409 | 6.804044247 | 2.314767838 | 4.975245918 |
| control-8  | 4.489276409 | 6.804044247 | 2.314767838 | 4.975245918 |
| stroke-1   | 4.592529774 | 6.804044247 | 2.211514473 | 4.631612232 |
| stroke-1   | 4.592529774 | 6.804044247 | 2.211514473 | 4.631612232 |
| stroke-1   | 4.592529774 | 6.804044247 | 2.211514473 | 4.631612232 |
| stroke-2   | 5.783895493 | 6.804044247 | 1.020148754 | 2.028128066 |
| stroke-2   | 5.783895493 | 6.804044247 | 1.020148754 | 2.028128066 |
| stroke-2   | 5.783895493 | 6.804044247 | 1.020148754 | 2.028128066 |
| stroke-3   | 3.046279907 | 6.804044247 | 3.757764339 | 13.52694683 |
| stroke-3   | 3.046279907 | 6.804044247 | 3.757764339 | 13.52694683 |
| stroke-3   | 3.046279907 | 6.804044247 | 3.757764339 | 13.52694683 |
| stroke-4   | 5.220332623 | 6.804044247 | 1.583711624 | 2.997400003 |
| stroke-4   | 5.220332623 | 6.804044247 | 1.583711624 | 2.997400003 |
| stroke-4   | 5.220332623 | 6.804044247 | 1.583711624 | 2.997400003 |
| stroke-5   | 4.67515707  | 6.804044247 | 2.128887177 | 4.373799771 |
| stroke-5   | 4.67515707  | 6.804044247 | 2.128887177 | 4.373799771 |
| stroke-5   | 4.67515707  | 6.804044247 | 2.128887177 | 4.373799771 |
| stroke-6   | 4.406322956 | 6.804044247 | 2.397721291 | 5.269701673 |
| stroke-6   | 4.406322956 | 6.804044247 | 2.397721291 | 5.269701673 |
| stroke-6   | 4.406322956 | 6.804044247 | 2.397721291 | 5.269701673 |
| stroke-7   | 4.81234026  | 6.804044247 | 1.991703987 | 3.977064575 |
| stroke-7   | 4.81234026  | 6.804044247 | 1.991703987 | 3.977064575 |
| stroke-7   | 4.81234026  | 6.804044247 | 1.991703987 | 3.977064575 |
| stroke-8   | 3.186045885 | 6.804044247 | 3.617998362 | 12.27795482 |
| stroke-8   | 3.186045885 | 6.804044247 | 3.617998362 | 12.27795482 |
| stroke-8   | 3.186045885 | 6.804044247 | 3.617998362 | 12.27795482 |
| control9   | 2.871681929 | 6.804044247 | 3.932362318 | 15.26718652 |
| control9   | 2.871681929 | 6.804044247 | 3.932362318 | 15.26718652 |
| control9   | 2.871681929 | 6.804044247 | 3.932362318 | 15.26718652 |
| control 10 | 3.148321152 | 6.804044247 | 3.655723095 | 12.60324293 |
| control 10 | 3.148321152 | 6.804044247 | 3.655723095 | 12.60324293 |
| control 10 | 3.148321152 | 6.804044247 | 3.655723095 | 12.60324293 |
| control11  | 5.188875198 | 6.804044247 | 1.615169048 | 3.063474937 |
| control11  | 5.188875198 | 6.804044247 | 1.615169048 | 3.063474937 |
| control11  | 5.188875198 | 6.804044247 | 1.615169048 | 3.063474937 |
| control 12 | 4.182418346 | 6.804044247 | 2.6216259   | 6.154432791 |
| control 12 | 4.182418346 | 6.804044247 | 2.6216259   | 6.154432791 |
| control 12 | 4.182418346 | 6.804044247 | 2.6216259   | 6.154432791 |
| control 13 | 2.767314196 | 6.804044247 | 4.036730051 | 16.41257901 |
| control 13 | 2.767314196 | 6.804044247 | 4.036730051 | 16.41257901 |
| control 13 | 2.767314196 | 6.804044247 | 4.036730051 | 16.41257901 |
| control 14 | 4.959344864 | 6.804044247 | 1.844699383 | 3.591780987 |
| control 14 | 4.959344864 | 6.804044247 | 1.844699383 | 3.591780987 |
| control 14 | 4.959344864 | 6.804044247 | 1.844699383 | 3.591780987 |
| control 15 | 4.617807865 | 6.804044247 | 2.186236382 | 4.551166546 |
| control 15 | 4.617807865 | 6.804044247 | 2.186236382 | 4.551166546 |
| control 15 | 4.617807865 | 6.804044247 | 2.186236382 | 4.551166546 |
| control 16 | 5.404774189 | 6.804044247 | 1.399270058 | 2.63768093  |
| control 16 | 5.404774189 | 6.804044247 | 1.399270058 | 2.63768093  |
| control 16 | 5.404774189 | 6.804044247 | 1.399270058 | 2.63768093  |
| stroke-9   | 3.986255646 | 6.804044247 | 2.817788601 | 7.050808028 |
| stroke-9   | 3.986255646 | 6.804044247 | 2.817788601 | 7.050808028 |
| stroke-9   | 3.986255646 | 6.804044247 | 2.817788601 | 7.050808028 |
| stroke-10  | 4.56879425  | 6.804044247 | 2.235249996 | 4.708442777 |
| stroke-10  | 4.56879425  | 6.804044247 | 2.235249996 | 4.708442777 |
| stroke-10  | 4.56879425  | 6.804044247 | 2.235249996 | 4.708442777 |
| stroke-11  | 6.804044247 | 6.804044247 | 0           | 1           |
| stroke-11  | 6.804044247 | 6.804044247 | 0           | 1           |
| stroke-11  | 6.804044247 | 6.804044247 | 0           | 1           |
| stroke-12  | 5.820761204 | 6.804044247 | 0.983283043 | 1.976959125 |
| stroke-12  | 5.820761204 | 6.804044247 | 0.983283043 | 1.976959125 |
| stroke-12  | 5.820761204 | 6.804044247 | 0.983283043 | 1.976959125 |
| stroke-13  | 4.955394268 | 6.804044247 | 1.848649979 | 3.601629999 |
| stroke-13  | 4.955394268 | 6.804044247 | 1.848649979 | 3.601629999 |
| stroke-13  | 4.955394268 | 6.804044247 | 1.848649979 | 3.601629999 |

|            |             |             |             |             |
|------------|-------------|-------------|-------------|-------------|
| stroke-14  | 4.591873646 | 6.804044247 | 2.212170601 | 4.633719137 |
| stroke-14  | 4.591873646 | 6.804044247 | 2.212170601 | 4.633719137 |
| stroke-14  | 4.591873646 | 6.804044247 | 2.212170601 | 4.633719137 |
| stroke-15  | 5.211851597 | 6.804044247 | 1.59219265  | 3.015072409 |
| stroke-15  | 5.211851597 | 6.804044247 | 1.59219265  | 3.015072409 |
| stroke-15  | 5.211851597 | 6.804044247 | 1.59219265  | 3.015072409 |
| stroke-16  | 5.007183552 | 6.804044247 | 1.796860695 | 3.474633217 |
| stroke-16  | 5.007183552 | 6.804044247 | 1.796860695 | 3.474633217 |
| stroke-16  | 5.007183552 | 6.804044247 | 1.796860695 | 3.474633217 |
| control-17 | 3.832456589 | 6.804044247 | 2.971587658 | 7.843989791 |
| control-17 | 3.832456589 | 6.804044247 | 2.971587658 | 7.843989791 |
| control-17 | 3.832456589 | 6.804044247 | 2.971587658 | 7.843989791 |
| control-18 | 3.958292723 | 6.804044247 | 2.845751524 | 7.188802775 |
| control-18 | 3.958292723 | 6.804044247 | 2.845751524 | 7.188802775 |
| control-18 | 3.958292723 | 6.804044247 | 2.845751524 | 7.188802775 |
| control-19 | 3.648995161 | 6.804044247 | 3.155049086 | 8.907676011 |
| control-19 | 3.648995161 | 6.804044247 | 3.155049086 | 8.907676011 |
| control-19 | 3.648995161 | 6.804044247 | 3.155049086 | 8.907676011 |
| control-20 | 4.986311436 | 6.804044247 | 1.817732811 | 3.525267687 |
| control-20 | 4.986311436 | 6.804044247 | 1.817732811 | 3.525267687 |
| control-20 | 4.986311436 | 6.804044247 | 1.817732811 | 3.525267687 |
| control-21 | 4.844490051 | 6.804044247 | 1.959554195 | 3.889417742 |
| control-21 | 4.844490051 | 6.804044247 | 1.959554195 | 3.889417742 |
| control-21 | 4.844490051 | 6.804044247 | 1.959554195 | 3.889417742 |
| control-22 | 4.939656734 | 6.804044247 | 1.864387512 | 3.641133184 |
| control-22 | 4.939656734 | 6.804044247 | 1.864387512 | 3.641133184 |
| control-22 | 4.939656734 | 6.804044247 | 1.864387512 | 3.641133184 |
| control-23 | 3.69518733  | 6.804044247 | 3.108856916 | 8.626987804 |
| control-23 | 3.69518733  | 6.804044247 | 3.108856916 | 8.626987804 |
| control-23 | 3.69518733  | 6.804044247 | 3.108856916 | 8.626987804 |
| control-24 | 3.261012316 | 6.804044247 | 3.543031931 | 11.65625089 |
| control-24 | 3.261012316 | 6.804044247 | 3.543031931 | 11.65625089 |
| control-24 | 3.261012316 | 6.804044247 | 3.543031931 | 11.65625089 |
| stroke-17  | 5.254110336 | 6.804044247 | 1.54993391  | 2.928037256 |
| stroke-17  | 5.254110336 | 6.804044247 | 1.54993391  | 2.928037256 |
| stroke-17  | 5.254110336 | 6.804044247 | 1.54993391  | 2.928037256 |
| stroke-18  | 6.006075382 | 6.804044247 | 0.797968864 | 1.738651597 |
| stroke-18  | 6.006075382 | 6.804044247 | 0.797968864 | 1.738651597 |
| stroke-18  | 6.006075382 | 6.804044247 | 0.797968864 | 1.738651597 |
| stroke-19  | 4.630680084 | 6.804044247 | 2.173364162 | 4.510740098 |
| stroke-19  | 4.630680084 | 6.804044247 | 2.173364162 | 4.510740098 |
| stroke-19  | 4.630680084 | 6.804044247 | 2.173364162 | 4.510740098 |
| stroke-20  | 4.953790665 | 6.804044247 | 1.850253582 | 3.605635556 |
| stroke-20  | 4.953790665 | 6.804044247 | 1.850253582 | 3.605635556 |
| stroke-20  | 4.953790665 | 6.804044247 | 1.850253582 | 3.605635556 |
| stroke-21  | 3.963003874 | 6.804044247 | 2.841040373 | 7.165365876 |
| stroke-21  | 3.963003874 | 6.804044247 | 2.841040373 | 7.165365876 |
| stroke-21  | 3.963003874 | 6.804044247 | 2.841040373 | 7.165365876 |
| stroke-22  | 4.455628872 | 6.804044247 | 2.348415375 | 5.092645783 |
| stroke-22  | 4.455628872 | 6.804044247 | 2.348415375 | 5.092645783 |
| stroke-22  | 4.455628872 | 6.804044247 | 2.348415375 | 5.092645783 |
| stroke-23  | 4.193437576 | 6.804044247 | 2.61060667  | 6.107604616 |
| stroke-23  | 4.193437576 | 6.804044247 | 2.61060667  | 6.107604616 |
| stroke-23  | 4.193437576 | 6.804044247 | 2.61060667  | 6.107604616 |
| stroke-24  | 4.146551132 | 6.804044247 | 2.657493114 | 6.309357568 |
| stroke-24  | 4.146551132 | 6.804044247 | 2.657493114 | 6.309357568 |
| stroke-24  | 4.146551132 | 6.804044247 | 2.657493114 | 6.309357568 |
| control-25 | 1.454742432 | 6.804044247 | 5.349301815 | 40.7662067  |
| control-25 | 1.454742432 | 6.804044247 | 5.349301815 | 40.7662067  |
| control-25 | 1.454742432 | 6.804044247 | 5.349301815 | 40.7662067  |
| control-26 | 0.832572937 | 6.804044247 | 5.97147131  | 62.74685781 |
| control-26 | 0.832572937 | 6.804044247 | 5.97147131  | 62.74685781 |
| control-26 | 0.832572937 | 6.804044247 | 5.97147131  | 62.74685781 |
| control-27 | 2.814962387 | 6.804044247 | 3.98908186  | 15.87937098 |
| control-27 | 2.814962387 | 6.804044247 | 3.98908186  | 15.87937098 |

|            |             |             |             |             |
|------------|-------------|-------------|-------------|-------------|
| control-27 | 2.814962387 | 6.804044247 | 3.98908186  | 15.87937098 |
| control-28 | 1.905248642 | 6.804044247 | 4.898795605 | 29.83214077 |
| control-28 | 1.905248642 | 6.804044247 | 4.898795605 | 29.83214077 |
| control-28 | 1.905248642 | 6.804044247 | 4.898795605 | 29.83214077 |
| control-29 | 2.568133116 | 6.804044247 | 4.235911131 | 18.84240392 |
| control-29 | 2.568133116 | 6.804044247 | 4.235911131 | 18.84240392 |
| control-29 | 2.568133116 | 6.804044247 | 4.235911131 | 18.84240392 |
| control-30 | 1.87986815  | 6.804044247 | 4.924176097 | 30.36160383 |
| control-30 | 1.87986815  | 6.804044247 | 4.924176097 | 30.36160383 |
| control-30 | 1.87986815  | 6.804044247 | 4.924176097 | 30.36160383 |
| control-31 | 2.706959486 | 6.804044247 | 4.097084761 | 17.11375884 |
| control-31 | 2.706959486 | 6.804044247 | 4.097084761 | 17.11375884 |
| control-31 | 2.706959486 | 6.804044247 | 4.097084761 | 17.11375884 |
| control-32 | 1.468818665 | 6.804044247 | 5.335225582 | 40.37038897 |
| control-32 | 1.468818665 | 6.804044247 | 5.335225582 | 40.37038897 |
| control-32 | 1.468818665 | 6.804044247 | 5.335225582 | 40.37038897 |
| stroke-25  | 4.291457653 | 6.804044247 | 2.512586594 | 5.706422605 |
| stroke-25  | 4.291457653 | 6.804044247 | 2.512586594 | 5.706422605 |
| stroke-25  | 4.291457653 | 6.804044247 | 2.512586594 | 5.706422605 |
| stroke-26  | 4.149076939 | 6.804044247 | 2.654967308 | 6.298321089 |
| stroke-26  | 4.149076939 | 6.804044247 | 2.654967308 | 6.298321089 |
| stroke-26  | 4.149076939 | 6.804044247 | 2.654967308 | 6.298321089 |
| stroke-27  | 6.699556828 | 6.804044247 | 0.104487419 | 1.075112342 |
| stroke-27  | 6.699556828 | 6.804044247 | 0.104487419 | 1.075112342 |
| stroke-27  | 6.699556828 | 6.804044247 | 0.104487419 | 1.075112342 |
| stroke-28  | 2.919909239 | 6.804044247 | 3.884135008 | 14.76526156 |
| stroke-28  | 2.919909239 | 6.804044247 | 3.884135008 | 14.76526156 |
| stroke-28  | 2.919909239 | 6.804044247 | 3.884135008 | 14.76526156 |
| stroke-29  | 1.597620606 | 6.804044247 | 5.20642364  | 36.92237984 |
| stroke-29  | 1.597620606 | 6.804044247 | 5.20642364  | 36.92237984 |
| stroke-29  | 1.597620606 | 6.804044247 | 5.20642364  | 36.92237984 |
| stroke-30  | 3.950876951 | 6.804044247 | 2.853167295 | 7.225849945 |
| stroke-30  | 3.950876951 | 6.804044247 | 2.853167295 | 7.225849945 |
| stroke-30  | 3.950876951 | 6.804044247 | 2.853167295 | 7.225849945 |
| stroke-31  | 2.159992218 | 6.804044247 | 4.644052029 | 25.00339386 |
| stroke-31  | 2.159992218 | 6.804044247 | 4.644052029 | 25.00339386 |
| stroke-31  | 2.159992218 | 6.804044247 | 4.644052029 | 25.00339386 |
| stroke-32  | 2.619544268 | 6.804044247 | 4.184499979 | 18.18276855 |
| stroke-32  | 2.619544268 | 6.804044247 | 4.184499979 | 18.18276855 |
| stroke-32  | 2.619544268 | 6.804044247 | 4.184499979 | 18.18276855 |

| sample     | RQ          | sample    | RQ          |
|------------|-------------|-----------|-------------|
| control-1  | 10.99159588 | stroke-1  | 4.631612232 |
| control-2  | 12.10853254 | stroke-2  | 2.028128066 |
| control-3  | 3.315450996 | stroke-3  | 13.52694683 |
| control-4  | 19.19944074 | stroke-4  | 2.997400003 |
| control-5  | 5.047631444 | stroke-5  | 4.373799771 |
| control-6  | 6.012831973 | stroke-6  | 5.269701673 |
| control-7  | 4.827344355 | stroke-7  | 3.977064575 |
| control-8  | 4.975245918 | stroke-8  | 12.27795482 |
| control-9  | 15.26718652 | stroke-9  | 7.050808028 |
| control-10 | 12.60324293 | stroke-10 | 4.708442777 |
| control-11 | 3.063474937 | stroke-11 | 1           |
| control-12 | 6.154432791 | stroke-12 | 1.976959125 |
| control-13 | 16.41257901 | stroke-13 | 3.601629999 |
| control-14 | 3.591780987 | stroke-14 | 4.633719137 |
| control-15 | 4.551166546 | stroke-15 | 3.015072409 |
| control-16 | 2.63768093  | stroke-16 | 3.474633217 |
| control-17 | 7.843989791 | stroke-17 | 2.928037256 |
| control-18 | 7.188802775 | stroke-18 | 1.738651597 |
| control-19 | 8.907676011 | stroke-19 | 4.510740098 |
| control-20 | 3.525267687 | stroke-20 | 3.605635556 |
| control-21 | 3.889417742 | stroke-21 | 7.165365876 |

|            |             |           |             |
|------------|-------------|-----------|-------------|
| control-22 | 3.641133184 | stroke-22 | 5.092645783 |
| control-23 | 8.626987804 | stroke-23 | 6.107604616 |
| control-24 | 11.65625089 | stroke-24 | 6.309357568 |
| control-25 | 40.7662067  | stroke-25 | 5.706422605 |
| control-26 | 62.74685781 | stroke-26 | 6.298321089 |
| control-27 | 15.87937098 | stroke-27 | 1.075112342 |
| control-28 | 29.83214077 | stroke-28 | 14.76526156 |
| control-29 | 18.84240392 | stroke-29 | 36.92237984 |
| control-30 | 30.36160383 | stroke-30 | 7.225849945 |
| control-31 | 17.11375884 | stroke-31 | 25.00339386 |
| control-32 | 40.37038897 | stroke-32 | 18.18276855 |

raw Ct data-circRNA-005548

| sample    | Raw Ct       | Ct Mean     |              |
|-----------|--------------|-------------|--------------|
| control-1 | 25.54924202  | 25.5304184  | GAPDH        |
| control-1 | 25.21582222  | 25.5304184  | GAPDH        |
| control-1 | 25.82618904  | 25.5304184  | GAPDH        |
| control-2 | 26.18410683  | 26.18205833 | GAPDH        |
| control-2 | 26.32764816  | 26.18205833 | GAPDH        |
| control-2 | 26.03442192  | 26.18205833 | GAPDH        |
| control-3 | 25.60534668  | 25.69304848 | GAPDH        |
| control-3 | 25.82950401  | 25.69304848 | GAPDH        |
| control-3 | 25.64429855  | 25.69304848 | GAPDH        |
| control-4 | 26.16055679  | 25.89408112 | GAPDH        |
| control-4 | 25.5130291   | 25.89408112 | GAPDH        |
| control-4 | 26.00865746  | 25.89408112 | GAPDH        |
| control-5 | 26.62539101  | 26.80245972 | GAPDH        |
| control-5 | 26.93436241  | 26.80245972 | GAPDH        |
| control-5 | 26.84762764  | 26.80245972 | GAPDH        |
| control-6 | 25.94897652  | 25.77236938 | GAPDH        |
| control-6 | 25.78363991  | 25.77236938 | GAPDH        |
| control-6 | 25.58449554  | 25.77236938 | GAPDH        |
| control-7 | 25.91959572  | 25.63115883 | GAPDH        |
| control-7 | 26.07379532  | 25.63115883 | GAPDH        |
| control-7 | 24.90008545  | 25.63115883 | GAPDH        |
| control-8 | 27.01070786  | 26.91640282 | GAPDH        |
| control-8 | 26.8848629   | 26.91640282 | GAPDH        |
| control-8 | 26.8536377   | 26.91640282 | GAPDH        |
| stroke-1  | 23.47739601  | 24.01311684 | GAPDH        |
| stroke-1  | 24.05852127  | 24.01311684 | GAPDH        |
| stroke-1  | 24.50343513  | 24.01311684 | GAPDH        |
| stroke-2  | 28.49221039  | 28.04417419 | GAPDH        |
| stroke-2  | 27.84469986  | 28.04417419 | GAPDH        |
| stroke-2  | 27.79561424  | 28.04417419 | GAPDH        |
| stroke-3  | 24.66034317  | 24.91215515 | GAPDH        |
| stroke-3  | 24.92931557  | 24.91215515 | GAPDH        |
| stroke-3  | 25.14680099  | 24.91215515 | GAPDH        |
| stroke-4  | 26.82505226  | 28.24936676 | GAPDH        |
| stroke-4  | 26.71202469  | 28.24936676 | GAPDH        |
| stroke-4  | 31.21102142  | 28.24936676 | GAPDH        |
| stroke-5  | 24.5884552   | 24.8166256  | GAPDH        |
| stroke-5  | 25.039217    | 24.8166256  | GAPDH        |
| stroke-5  | 24.82220078  | 24.8166256  | GAPDH        |
| stroke-6  | 35.46171188  | 35.68018341 | GAPDH        |
| stroke-6  | 35.89865112  | 35.68018341 | GAPDH        |
| stroke-6  | Undetermined | 35.68018341 | GAPDH        |
| stroke-7  | 22.39485168  | 22.81052589 | GAPDH        |
| stroke-7  | 22.87345886  | 22.81052589 | GAPDH        |
| stroke-7  | 23.16327095  | 22.81052589 | GAPDH        |
| stroke-8  | 23.62879181  | 24.84118652 | GAPDH        |
| stroke-8  | 23.25596237  | 24.84118652 | GAPDH        |
| stroke-8  | 27.63880348  | 24.84118652 | GAPDH        |
| control-1 | 30.13471222  | 29.7931118  | circ-0005548 |
| control-1 | 29.37664986  | 29.7931118  | circ-0005548 |

|            |             |             |              |
|------------|-------------|-------------|--------------|
| control-1  | 29.86797333 | 29.7931118  | circ-0005548 |
| control-2  | 29.92319489 | 29.46327209 | circ-0005548 |
| control-2  | 29.48360252 | 29.46327209 | circ-0005548 |
| control-2  | 28.98301697 | 29.46327209 | circ-0005548 |
| control-3  | 29.43703079 | 29.39609337 | circ-0005548 |
| control-3  | 29.71819496 | 29.39609337 | circ-0005548 |
| control-3  | 29.03305244 | 29.39609337 | circ-0005548 |
| control-4  | 28.53248405 | 28.74155426 | circ-0005548 |
| control-4  | 28.88143539 | 28.74155426 | circ-0005548 |
| control-4  | 28.81074333 | 28.74155426 | circ-0005548 |
| control-5  | 29.82089424 | 30.12084389 | circ-0005548 |
| control-5  | 30.30127335 | 30.12084389 | circ-0005548 |
| control-5  | 30.24036407 | 30.12084389 | circ-0005548 |
| control-6  | 28.93020439 | 28.93260002 | circ-0005548 |
| control-6  | 28.92459488 | 28.93260002 | circ-0005548 |
| control-6  | 28.94299889 | 28.93260002 | circ-0005548 |
| control-7  | 29.14531326 | 29.3142643  | circ-0005548 |
| control-7  | 29.33281326 | 29.3142643  | circ-0005548 |
| control-7  | 29.46466637 | 29.3142643  | circ-0005548 |
| control-8  | 30.54811668 | 30.06637001 | circ-0005548 |
| control-8  | 29.89681435 | 30.06637001 | circ-0005548 |
| control-8  | 29.75418091 | 30.06637001 | circ-0005548 |
| stroke-1   | 28.84966278 | 28.8271656  | circ-0005548 |
| stroke-1   | 29.40960693 | 28.8271656  | circ-0005548 |
| stroke-1   | 28.222229   | 28.8271656  | circ-0005548 |
| stroke-2   | 30.83957863 | 31.3448391  | circ-0005548 |
| stroke-2   | 31.21593285 | 31.3448391  | circ-0005548 |
| stroke-2   | 31.97900391 | 31.3448391  | circ-0005548 |
| stroke-3   | 28.89603233 | 29.23703957 | circ-0005548 |
| stroke-3   | 29.41209984 | 29.23703957 | circ-0005548 |
| stroke-3   | 29.40299034 | 29.23703957 | circ-0005548 |
| stroke-4   | 29.9642334  | 30.0290451  | circ-0005548 |
| stroke-4   | 29.97315979 | 30.0290451  | circ-0005548 |
| stroke-4   | 30.14974403 | 30.0290451  | circ-0005548 |
| stroke-5   | 29.09393501 | 29.22374535 | circ-0005548 |
| stroke-5   | 29.73144913 | 29.22374535 | circ-0005548 |
| stroke-5   | 28.8458519  | 29.22374535 | circ-0005548 |
| stroke-6   | 28.86117172 | 28.70638466 | circ-0005548 |
| stroke-6   | 28.98764992 | 28.70638466 | circ-0005548 |
| stroke-6   | 28.27033806 | 28.70638466 | circ-0005548 |
| stroke-7   | 28.2237339  | 28.06319237 | circ-0005548 |
| stroke-7   | 27.77008247 | 28.06319237 | circ-0005548 |
| stroke-7   | 28.19575691 | 28.06319237 | circ-0005548 |
| stroke-8   | 28.37052155 | 28.6648407  | circ-0005548 |
| stroke-8   | 28.76832771 | 28.6648407  | circ-0005548 |
| stroke-8   | 28.85567474 | 28.6648407  | circ-0005548 |
| control9   | 18.49805832 | 18.60410137 | GAPDH        |
| control9   | 18.71014023 | 18.60410137 | GAPDH        |
| control9   | 18.60410557 | 18.60410137 | GAPDH        |
| control 10 | 20.03706932 | 20.55056953 | GAPDH        |
| control 10 | 20.79405975 | 20.55056953 | GAPDH        |
| control 10 | 20.82057762 | 20.55056953 | GAPDH        |
| control11  | 20.23067474 | 19.85377502 | GAPDH        |
| control11  | 19.47781372 | 19.85377502 | GAPDH        |
| control11  | 19.85283852 | 19.85377502 | GAPDH        |
| control 12 | 18.5678978  | 19.01976585 | GAPDH        |
| control 12 | 19.01865768 | 19.01976585 | GAPDH        |
| control 12 | 19.47274017 | 19.01976585 | GAPDH        |
| control 13 | 18.53126717 | 18.68808746 | GAPDH        |
| control 13 | 19.43749428 | 18.68808746 | GAPDH        |
| control 13 | 18.09549904 | 18.68808746 | GAPDH        |
| control 14 | 20.79653358 | 20.88736534 | GAPDH        |
| control 14 | 20.72556114 | 20.88736534 | GAPDH        |
| control 14 | 21.13999748 | 20.88736534 | GAPDH        |
| control 15 | 19.49267006 | 19.57484627 | GAPDH        |

|            |             |             |              |
|------------|-------------|-------------|--------------|
| control 15 | 19.41773605 | 19.57484627 | GAPDH        |
| control 15 | 19.81413841 | 19.57484627 | GAPDH        |
| control 16 | 18.50798607 | 19.14769745 | GAPDH        |
| control 16 | 19.35250473 | 19.14769745 | GAPDH        |
| control 16 | 19.58259773 | 19.14769745 | GAPDH        |
| stroke-9   | 25.51529503 | 24.94852448 | GAPDH        |
| stroke-9   | 24.22061348 | 24.94852448 | GAPDH        |
| stroke-9   | 25.10966301 | 24.94852448 | GAPDH        |
| stroke-10  | 24.22356224 | 24.27387238 | GAPDH        |
| stroke-10  | 24.11852646 | 24.27387238 | GAPDH        |
| stroke-10  | 24.47952843 | 24.27387238 | GAPDH        |
| stroke-11  | 21.25199699 | 21.2925396  | GAPDH        |
| stroke-11  | 21.21507645 | 21.2925396  | GAPDH        |
| stroke-11  | 21.41053963 | 21.2925396  | GAPDH        |
| stroke-12  | 21.31844139 | 21.29785156 | GAPDH        |
| stroke-12  | 21.33186531 | 21.29785156 | GAPDH        |
| stroke-12  | 21.24324799 | 21.29785156 | GAPDH        |
| stroke-13  | 21.75457382 | 21.79486084 | GAPDH        |
| stroke-13  | 21.78793907 | 21.79486084 | GAPDH        |
| stroke-13  | 21.84206963 | 21.79486084 | GAPDH        |
| stroke-14  | 20.01085663 | 19.99152946 | GAPDH        |
| stroke-14  | 19.27136803 | 19.99152946 | GAPDH        |
| stroke-14  | 20.69235992 | 19.99152946 | GAPDH        |
| stroke-15  | 20.33838272 | 20.65740776 | GAPDH        |
| stroke-15  | 21.03596497 | 20.65740776 | GAPDH        |
| stroke-15  | 20.5978775  | 20.65740776 | GAPDH        |
| stroke-16  | 21.27140236 | 21.15710258 | GAPDH        |
| stroke-16  | 20.84852409 | 21.15710258 | GAPDH        |
| stroke-16  | 21.3513813  | 21.15710258 | GAPDH        |
| control9   | 28.27529716 | 27.79139137 | circ-0005548 |
| control9   | 27.6286869  | 27.79139137 | circ-0005548 |
| control9   | 27.47019196 | 27.79139137 | circ-0005548 |
| control 10 | 29.32610321 | 29.172472   | circ-0005548 |
| control 10 | 28.98474884 | 29.172472   | circ-0005548 |
| control 10 | 29.20656586 | 29.172472   | circ-0005548 |
| control11  | 27.27981758 | 27.5242939  | circ-0005548 |
| control11  | 27.74784279 | 27.5242939  | circ-0005548 |
| control11  | 27.54522133 | 27.5242939  | circ-0005548 |
| control 12 | 27.03682899 | 27.23122406 | circ-0005548 |
| control 12 | 27.07709694 | 27.23122406 | circ-0005548 |
| control 12 | 27.57974434 | 27.23122406 | circ-0005548 |
| control 13 | 28.36922264 | 28.32983208 | circ-0005548 |
| control 13 | 27.95604706 | 28.32983208 | circ-0005548 |
| control 13 | 28.66422272 | 28.32983208 | circ-0005548 |
| control 14 | 27.96492386 | 27.70201111 | circ-0005548 |
| control 14 | 27.1071949  | 27.70201111 | circ-0005548 |
| control 14 | 28.03391838 | 27.70201111 | circ-0005548 |
| control 15 | 26.80350304 | 27.21355438 | circ-0005548 |
| control 15 | 27.17761612 | 27.21355438 | circ-0005548 |
| control 15 | 27.65954399 | 27.21355438 | circ-0005548 |
| control 16 | 27.34659576 | 27.57818604 | circ-0005548 |
| control 16 | 27.83520508 | 27.57818604 | circ-0005548 |
| control 16 | 27.55275345 | 27.57818604 | circ-0005548 |
| stroke-9   | 31.32762527 | 30.80535316 | circ-0005548 |
| stroke-9   | 30.64169312 | 30.80535316 | circ-0005548 |
| stroke-9   | 30.4467392  | 30.80535316 | circ-0005548 |
| stroke-10  | 27.89973068 | 28.98496437 | circ-0005548 |
| stroke-10  | 28.12163162 | 28.98496437 | circ-0005548 |
| stroke-10  | 30.9335289  | 28.98496437 | circ-0005548 |
| stroke-11  | 28.32009697 | 28.09488869 | circ-0005548 |
| stroke-11  | 28.06675529 | 28.09488869 | circ-0005548 |
| stroke-11  | 27.89781189 | 28.09488869 | circ-0005548 |
| stroke-12  | 28.87808609 | 28.9653492  | circ-0005548 |
| stroke-12  | 28.75458908 | 28.9653492  | circ-0005548 |
| stroke-12  | 29.26337433 | 28.9653492  | circ-0005548 |

|            |             |             |              |
|------------|-------------|-------------|--------------|
| stroke-13  | 30.20879745 | 30.18146706 | circ-0005548 |
| stroke-13  | 30.82528305 | 30.18146706 | circ-0005548 |
| stroke-13  | 29.51032257 | 30.18146706 | circ-0005548 |
| stroke-14  | 28.57320976 | 28.7130127  | circ-0005548 |
| stroke-14  | 28.71076202 | 28.7130127  | circ-0005548 |
| stroke-14  | 28.85506821 | 28.7130127  | circ-0005548 |
| stroke-15  | 28.57791138 | 28.82722282 | circ-0005548 |
| stroke-15  | 28.75793839 | 28.82722282 | circ-0005548 |
| stroke-15  | 29.1458149  | 28.82722282 | circ-0005548 |
| stroke-16  | 28.82444763 | 28.85632324 | circ-0005548 |
| stroke-16  | 28.92103195 | 28.85632324 | circ-0005548 |
| stroke-16  | 28.82348824 | 28.85632324 | circ-0005548 |
| control-17 | 25.84146309 | 25.73897362 | GAPDH        |
| control-17 | 25.44108582 | 25.73897362 | GAPDH        |
| control-17 | 25.93436813 | 25.73897362 | GAPDH        |
| control-18 | 26.14860535 | 25.95986938 | GAPDH        |
| control-18 | 25.83952904 | 25.95986938 | GAPDH        |
| control-18 | 25.89147568 | 25.95986938 | GAPDH        |
| control-19 | 25.49755478 | 25.56768799 | GAPDH        |
| control-19 | 25.57378006 | 25.56768799 | GAPDH        |
| control-19 | 25.63172913 | 25.56768799 | GAPDH        |
| control-20 | 25.14019203 | 25.3269825  | GAPDH        |
| control-20 | 25.29609299 | 25.3269825  | GAPDH        |
| control-20 | 25.54466438 | 25.3269825  | GAPDH        |
| control-21 | 26.88145828 | 26.79045105 | GAPDH        |
| control-21 | 26.85717964 | 26.79045105 | GAPDH        |
| control-21 | 26.63271904 | 26.79045105 | GAPDH        |
| control-22 | 25.9525528  | 25.74632072 | GAPDH        |
| control-22 | 25.5992794  | 25.74632072 | GAPDH        |
| control-22 | 25.68712997 | 25.74632072 | GAPDH        |
| control-23 | 25.78086853 | 25.92199516 | GAPDH        |
| control-23 | 25.96206093 | 25.92199516 | GAPDH        |
| control-23 | 26.02305412 | 25.92199516 | GAPDH        |
| control-24 | 26.70739365 | 26.71579933 | GAPDH        |
| control-24 | 26.65486145 | 26.71579933 | GAPDH        |
| control-24 | 26.78514671 | 26.71579933 | GAPDH        |
| stroke-17  | 24.64425087 | 24.57648659 | GAPDH        |
| stroke-17  | 24.61152267 | 24.57648659 | GAPDH        |
| stroke-17  | 24.47368813 | 24.57648659 | GAPDH        |
| stroke-18  | 28.17127419 | 28.12898254 | GAPDH        |
| stroke-18  | 28.19966698 | 28.12898254 | GAPDH        |
| stroke-18  | 28.01600647 | 28.12898254 | GAPDH        |
| stroke-19  | 24.8534584  | 24.96452332 | GAPDH        |
| stroke-19  | 24.90655327 | 24.96452332 | GAPDH        |
| stroke-19  | 25.13355446 | 24.96452332 | GAPDH        |
| stroke-20  | 26.54661369 | 27.98045921 | GAPDH        |
| stroke-20  | 26.804636   | 27.98045921 | GAPDH        |
| stroke-20  | 30.59012794 | 27.98045921 | GAPDH        |
| stroke-21  | 24.88801956 | 24.81388855 | GAPDH        |
| stroke-21  | 24.85343933 | 24.81388855 | GAPDH        |
| stroke-21  | 24.70020866 | 24.81388855 | GAPDH        |
| stroke-22  | 23.66060257 | 23.50028038 | GAPDH        |
| stroke-22  | 23.86288452 | 23.50028038 | GAPDH        |
| stroke-22  | 22.97735405 | 23.50028038 | GAPDH        |
| stroke-23  | 23.52408409 | 23.7984848  | GAPDH        |
| stroke-23  | 23.82956886 | 23.7984848  | GAPDH        |
| stroke-23  | 24.04180145 | 23.7984848  | GAPDH        |
| stroke-24  | 25.91849899 | 26.92940331 | GAPDH        |
| stroke-24  | 25.98884392 | 26.92940331 | GAPDH        |
| stroke-24  | 28.88086128 | 26.92940331 | GAPDH        |
| control-17 | 29.31820107 | 29.43020439 | circ-0005548 |
| control-17 | 29.2917366  | 29.43020439 | circ-0005548 |
| control-17 | 29.6806736  | 29.43020439 | circ-0005548 |
| control-18 | 29.96067429 | 29.96424294 | circ-0005548 |
| control-18 | 30.00048256 | 29.96424294 | circ-0005548 |

|            |             |             |              |
|------------|-------------|-------------|--------------|
| control-18 | 29.93156815 | 29.96424294 | circ-0005548 |
| control-19 | 29.35986519 | 29.45892143 | circ-0005548 |
| control-19 | 29.30387115 | 29.45892143 | circ-0005548 |
| control-19 | 29.71302605 | 29.45892143 | circ-0005548 |
| control-20 | 28.83373451 | 28.74543953 | circ-0005548 |
| control-20 | 28.76586723 | 28.74543953 | circ-0005548 |
| control-20 | 28.63671875 | 28.74543953 | circ-0005548 |
| control-21 | 30.94665146 | 30.76081848 | circ-0005548 |
| control-21 | 31.01482582 | 30.76081848 | circ-0005548 |
| control-21 | 30.32098389 | 30.76081848 | circ-0005548 |
| control-22 | 28.89760208 | 28.75770569 | circ-0005548 |
| control-22 | 28.74171448 | 28.75770569 | circ-0005548 |
| control-22 | 28.63380432 | 28.75770569 | circ-0005548 |
| control-23 | 28.95204544 | 28.93157005 | circ-0005548 |
| control-23 | 28.90785789 | 28.93157005 | circ-0005548 |
| control-23 | 28.93480301 | 28.93157005 | circ-0005548 |
| control-24 | 29.60251045 | 29.23786926 | circ-0005548 |
| control-24 | 29.57151604 | 29.23786926 | circ-0005548 |
| control-24 | 28.53958321 | 29.23786926 | circ-0005548 |
| stroke-17  | 29.64040184 | 29.0573349  | circ-0005548 |
| stroke-17  | 29.05752373 | 29.0573349  | circ-0005548 |
| stroke-17  | 28.47407913 | 29.0573349  | circ-0005548 |
| stroke-18  | 30.98116875 | 31.19766235 | circ-0005548 |
| stroke-18  | 30.97106171 | 31.19766235 | circ-0005548 |
| stroke-18  | 31.6407547  | 31.19766235 | circ-0005548 |
| stroke-19  | 29.54527283 | 29.63822746 | circ-0005548 |
| stroke-19  | 29.52233887 | 29.63822746 | circ-0005548 |
| stroke-19  | 29.84707069 | 29.63822746 | circ-0005548 |
| stroke-20  | 29.7865181  | 29.72163391 | circ-0005548 |
| stroke-20  | 29.68669128 | 29.72163391 | circ-0005548 |
| stroke-20  | 29.69169807 | 29.72163391 | circ-0005548 |
| stroke-21  | 29.87291718 | 29.92972755 | circ-0005548 |
| stroke-21  | 29.87873459 | 29.92972755 | circ-0005548 |
| stroke-21  | 30.0375309  | 29.92972755 | circ-0005548 |
| stroke-22  | 29.8132782  | 29.37895203 | circ-0005548 |
| stroke-22  | 29.19760895 | 29.37895203 | circ-0005548 |
| stroke-22  | 29.12596703 | 29.37895203 | circ-0005548 |
| stroke-23  | 29.4093132  | 29.35191345 | circ-0005548 |
| stroke-23  | 29.0681057  | 29.35191345 | circ-0005548 |
| stroke-23  | 29.57831573 | 29.35191345 | circ-0005548 |
| stroke-24  | 28.61583138 | 28.6761322  | circ-0005548 |
| stroke-24  | 28.5135498  | 28.6761322  | circ-0005548 |
| stroke-24  | 28.89901733 | 28.6761322  | circ-0005548 |
| control-25 | 24.67868423 | 25.00511932 | GAPDH        |
| control-25 | 25.12644196 | 25.00511932 | GAPDH        |
| control-25 | 25.21023178 | 25.00511932 | GAPDH        |
| control-26 | 22.17980957 | 22.68137932 | GAPDH        |
| control-26 | 23.07166672 | 22.68137932 | GAPDH        |
| control-26 | 22.79266167 | 22.68137932 | GAPDH        |
| control-27 | 23.39224625 | 24.72233009 | GAPDH        |
| control-27 | 25.39827919 | 24.72233009 | GAPDH        |
| control-27 | 25.37647057 | 24.72233009 | GAPDH        |
| control-28 | 24.03521538 | 24.23166084 | GAPDH        |
| control-28 | 23.88560486 | 24.23166084 | GAPDH        |
| control-28 | 24.77416039 | 24.23166084 | GAPDH        |
| control-29 | 23.53442383 | 23.73780823 | GAPDH        |
| control-29 | 23.91172791 | 23.73780823 | GAPDH        |
| control-29 | 23.76727295 | 23.73780823 | GAPDH        |
| control-30 | 25.26303864 | 24.47930336 | GAPDH        |
| control-30 | 23.9221344  | 24.47930336 | GAPDH        |
| control-30 | 24.25274086 | 24.47930336 | GAPDH        |
| control-31 | 22.96356583 | 23.54529762 | GAPDH        |
| control-31 | 23.40715981 | 23.54529762 | GAPDH        |
| control-31 | 24.26517105 | 23.54529762 | GAPDH        |
| control-32 | 24.89213753 | 25.24001312 | GAPDH        |

|            |             |             |              |
|------------|-------------|-------------|--------------|
| control-32 | 25.58073616 | 25.24001312 | GAPDH        |
| control-32 | 25.24716949 | 25.24001312 | GAPDH        |
| stroke-25  | 24.10925293 | 24.26269722 | GAPDH        |
| stroke-25  | 24.95045662 | 24.26269722 | GAPDH        |
| stroke-25  | 23.72838593 | 24.26269722 | GAPDH        |
| stroke-26  | 22.71949768 | 22.87644386 | GAPDH        |
| stroke-26  | 22.84646416 | 22.87644386 | GAPDH        |
| stroke-26  | 23.06337547 | 22.87644386 | GAPDH        |
| stroke-27  | 24.76853752 | 25.5241909  | GAPDH        |
| stroke-27  | 25.82514572 | 25.5241909  | GAPDH        |
| stroke-27  | 25.97888756 | 25.5241909  | GAPDH        |
| stroke-28  | 21.53846169 | 21.51788521 | GAPDH        |
| stroke-28  | 21.19041252 | 21.51788521 | GAPDH        |
| stroke-28  | 21.82478523 | 21.51788521 | GAPDH        |
| stroke-29  | 25.44576836 | 25.83963013 | GAPDH        |
| stroke-29  | 26.39275169 | 25.83963013 | GAPDH        |
| stroke-29  | 25.68036652 | 25.83963013 | GAPDH        |
| stroke-30  | 22.82670784 | 22.95581818 | GAPDH        |
| stroke-30  | 22.99809837 | 22.95581818 | GAPDH        |
| stroke-30  | 23.04265022 | 22.95581818 | GAPDH        |
| stroke-31  | 23.24854279 | 22.61452293 | GAPDH        |
| stroke-31  | 21.68766785 | 22.61452293 | GAPDH        |
| stroke-31  | 22.90736008 | 22.61452293 | GAPDH        |
| stroke-32  | 22.25065231 | 23.17136574 | GAPDH        |
| stroke-32  | 24.14462852 | 23.17136574 | GAPDH        |
| stroke-32  | 23.11882019 | 23.17136574 | GAPDH        |
| control-25 | 28.18592072 | 28.40953827 | circ-0005548 |
| control-25 | 28.50474358 | 28.40953827 | circ-0005548 |
| control-25 | 28.53794861 | 28.40953827 | circ-0005548 |
| control-26 | 26.01140404 | 25.95163918 | circ-0005548 |
| control-26 | 25.89340782 | 25.95163918 | circ-0005548 |
| control-26 | 25.95010376 | 25.95163918 | circ-0005548 |
| control-27 | 27.56446838 | 25.48612976 | circ-0005548 |
| control-27 | 22.93903923 | 25.48612976 | circ-0005548 |
| control-27 | 25.95488358 | 25.48612976 | circ-0005548 |
| control-28 | 28.63087654 | 28.22242737 | circ-0005548 |
| control-28 | 28.14642715 | 28.22242737 | circ-0005548 |
| control-28 | 27.88998222 | 28.22242737 | circ-0005548 |
| control-29 | 27.48137474 | 26.4030056  | circ-0005548 |
| control-29 | 26.96049309 | 26.4030056  | circ-0005548 |
| control-29 | 24.76714897 | 26.4030056  | circ-0005548 |
| control-30 | 27.20843506 | 27.48822021 | circ-0005548 |
| control-30 | 27.90198898 | 27.48822021 | circ-0005548 |
| control-30 | 27.35423279 | 27.48822021 | circ-0005548 |
| control-31 | 28.00518608 | 27.95604134 | circ-0005548 |
| control-31 | 28.03863907 | 27.95604134 | circ-0005548 |
| control-31 | 27.82429886 | 27.95604134 | circ-0005548 |
| control-32 | 28.23088646 | 27.546278   | circ-0005548 |
| control-32 | 28.51524544 | 27.546278   | circ-0005548 |
| control-32 | 25.89269638 | 27.546278   | circ-0005548 |
| stroke-25  | 22.77723312 | 27.37389183 | circ-0005548 |
| stroke-25  | 29.82105255 | 27.37389183 | circ-0005548 |
| stroke-25  | 29.52338982 | 27.37389183 | circ-0005548 |
| stroke-26  | 27.66707993 | 27.66615868 | circ-0005548 |
| stroke-26  | 27.9228363  | 27.66615868 | circ-0005548 |
| stroke-26  | 27.40856171 | 27.66615868 | circ-0005548 |
| stroke-27  | 23.18893623 | 24.71518135 | circ-0005548 |
| stroke-27  | 22.33311462 | 24.71518135 | circ-0005548 |
| stroke-27  | 28.62349701 | 24.71518135 | circ-0005548 |
| stroke-28  | 26.18709373 | 26.12702179 | circ-0005548 |
| stroke-28  | 25.86688995 | 26.12702179 | circ-0005548 |
| stroke-28  | 26.32708168 | 26.12702179 | circ-0005548 |
| stroke-29  | 29.07029724 | 27.15695763 | circ-0005548 |
| stroke-29  | 29.14267731 | 27.15695763 | circ-0005548 |
| stroke-29  | 23.25790024 | 27.15695763 | circ-0005548 |

|           |             |             |              |
|-----------|-------------|-------------|--------------|
| stroke-30 | 27.14013481 | 24.42239189 | circ-0005548 |
| stroke-30 | 23.75274277 | 24.42239189 | circ-0005548 |
| stroke-30 | 22.37429237 | 24.42239189 | circ-0005548 |
| stroke-31 | 22.36986351 | 23.99481964 | circ-0005548 |
| stroke-31 | 23.54318619 | 23.99481964 | circ-0005548 |
| stroke-31 | 26.07140541 | 23.99481964 | circ-0005548 |
| stroke-32 | 26.64640617 | 26.95273399 | circ-0005548 |
| stroke-32 | 27.1030674  | 26.95273399 | circ-0005548 |
| stroke-32 | 27.10872459 | 26.95273399 | circ-0005548 |

| sample     | $\Delta CT$ |            | $\Delta\Delta CT$ | RQ          |
|------------|-------------|------------|-------------------|-------------|
| control-1  | 4.262693882 | 9.64174366 | 5.379049778       | 41.61552054 |
| control-1  | 4.262693882 | 9.64174366 | 5.379049778       | 41.61552054 |
| control-1  | 4.262693882 | 9.64174366 | 5.379049778       | 41.61552054 |
| control-2  | 3.281212568 | 9.64174366 | 6.360531092       | 82.1695005  |
| control-2  | 3.281212568 | 9.64174366 | 6.360531092       | 82.1695005  |
| control-2  | 3.281212568 | 9.64174366 | 6.360531092       | 82.1695005  |
| control-3  | 3.703042984 | 9.64174366 | 5.938700676       | 61.33763668 |
| control-3  | 3.703042984 | 9.64174366 | 5.938700676       | 61.33763668 |
| control-3  | 3.703042984 | 9.64174366 | 5.938700676       | 61.33763668 |
| control-4  | 2.847473145 | 9.64174366 | 6.794270515       | 110.9888174 |
| control-4  | 2.847473145 | 9.64174366 | 6.794270515       | 110.9888174 |
| control-4  | 2.847473145 | 9.64174366 | 6.794270515       | 110.9888174 |
| control-5  | 3.318383455 | 9.64174366 | 6.323360205       | 80.07945246 |
| control-5  | 3.318383455 | 9.64174366 | 6.323360205       | 80.07945246 |
| control-5  | 3.318383455 | 9.64174366 | 6.323360205       | 80.07945246 |
| control-6  | 3.160228729 | 9.64174366 | 6.481514931       | 89.3573769  |
| control-6  | 3.160228729 | 9.64174366 | 6.481514931       | 89.3573769  |
| control-6  | 3.160228729 | 9.64174366 | 6.481514931       | 89.3573769  |
| control-7  | 3.683105469 | 9.64174366 | 5.958638191       | 62.19118455 |
| control-7  | 3.683105469 | 9.64174366 | 5.958638191       | 62.19118455 |
| control-7  | 3.683105469 | 9.64174366 | 5.958638191       | 62.19118455 |
| control-8  | 3.149967909 | 9.64174366 | 6.491775751       | 89.99517508 |
| control-8  | 3.149967909 | 9.64174366 | 6.491775751       | 89.99517508 |
| control-8  | 3.149967909 | 9.64174366 | 6.491775751       | 89.99517508 |
| stroke-1   | 3.72        | 9.64174366 | 5.92174366        | 60.62091235 |
| stroke-1   | 3.72        | 9.64174366 | 5.92174366        | 60.62091235 |
| stroke-1   | 3.72        | 9.64174366 | 5.92174366        | 60.62091235 |
| stroke-2   | 3.30066371  | 9.64174366 | 6.34107995        | 81.06908475 |
| stroke-2   | 3.30066371  | 9.64174366 | 6.34107995        | 81.06908475 |
| stroke-2   | 3.30066371  | 9.64174366 | 6.34107995        | 81.06908475 |
| stroke-3   | 4.324887753 | 9.64174366 | 5.316855907       | 39.85961603 |
| stroke-3   | 4.324887753 | 9.64174366 | 5.316855907       | 39.85961603 |
| stroke-3   | 4.324887753 | 9.64174366 | 5.316855907       | 39.85961603 |
| stroke-4   | 1.779679656 | 9.64174366 | 7.862064004       | 232.6575192 |
| stroke-4   | 1.779679656 | 9.64174366 | 7.862064004       | 232.6575192 |
| stroke-4   | 1.779679656 | 9.64174366 | 7.862064004       | 232.6575192 |
| stroke-5   | 4.407121181 | 9.64174366 | 5.234622478       | 37.65116182 |
| stroke-5   | 4.407121181 | 9.64174366 | 5.234622478       | 37.65116182 |
| stroke-5   | 4.407121181 | 9.64174366 | 5.234622478       | 37.65116182 |
| stroke-6   | 1           | 9.64174366 | 8.64174366        | 399.414711  |
| stroke-6   | 1           | 9.64174366 | 8.64174366        | 399.414711  |
| stroke-6   | 1           | 9.64174366 | 8.64174366        | 399.414711  |
| stroke-7   | 5.252664089 | 9.64174366 | 4.389079571       | 20.95292238 |
| stroke-7   | 5.252664089 | 9.64174366 | 4.389079571       | 20.95292238 |
| stroke-7   | 5.252664089 | 9.64174366 | 4.389079571       | 20.95292238 |
| stroke-8   | 3.823655367 | 9.64174366 | 5.818088293       | 56.4181828  |
| stroke-8   | 3.823655367 | 9.64174366 | 5.818088293       | 56.4181828  |
| stroke-8   | 3.823655367 | 9.64174366 | 5.818088293       | 56.4181828  |
| control9   | 9.18729     | 14         | 4.81271           | 28.10412513 |
| control9   | 9.18729     | 14         | 4.81271           | 28.10412513 |
| control9   | 9.18729     | 14         | 4.81271           | 28.10412513 |
| control 10 | 8.621903419 | 14         | 5.378096581       | 41.588034   |

|            |             |            |             |             |
|------------|-------------|------------|-------------|-------------|
| control 10 | 8.621903419 | 14         | 5.378096581 | 41.588034   |
| control 10 | 8.621903419 | 14         | 5.378096581 | 41.588034   |
| control11  | 7.670518398 | 14         | 6.329481602 | 80.41995377 |
| control11  | 7.670518398 | 14         | 6.329481602 | 80.41995377 |
| control11  | 7.670518398 | 14         | 6.329481602 | 80.41995377 |
| control 12 | 8.211458206 | 14         | 5.788541794 | 55.27448579 |
| control 12 | 8.211458206 | 14         | 5.788541794 | 55.27448579 |
| control 12 | 8.211458206 | 14         | 5.788541794 | 55.27448579 |
| control 13 | 9.64174366  | 14         | 4.35825634  | 20.51001071 |
| control 13 | 9.64174366  | 14         | 4.35825634  | 20.51001071 |
| control 13 | 9.64174366  | 14         | 4.35825634  | 20.51001071 |
| control 14 | 6.814648151 | 14         | 7.185351849 | 145.5480649 |
| control 14 | 6.814648151 | 14         | 7.185351849 | 145.5480649 |
| control 14 | 6.814648151 | 14         | 7.185351849 | 145.5480649 |
| control 15 | 7.638706207 | 14         | 6.361293793 | 82.21295205 |
| control 15 | 7.638706207 | 14         | 6.361293793 | 82.21295205 |
| control 15 | 7.638706207 | 14         | 6.361293793 | 82.21295205 |
| control 16 | 8.430488586 | 14         | 5.569511414 | 47.48866891 |
| control 16 | 8.430488586 | 14         | 5.569511414 | 47.48866891 |
| control 16 | 8.430488586 | 14         | 5.569511414 | 47.48866891 |
| stroke-9   | 5.85682869  | 14         | 8.14317131  | 282.7084726 |
| stroke-9   | 5.85682869  | 14         | 8.14317131  | 282.7084726 |
| stroke-9   | 5.85682869  | 14         | 8.14317131  | 282.7084726 |
| stroke-10  | 4.711091518 | 14         | 9.288908482 | 625.5183866 |
| stroke-10  | 4.711091518 | 14         | 9.288908482 | 625.5183866 |
| stroke-10  | 4.711091518 | 14         | 9.288908482 | 625.5183866 |
| stroke-11  | 6.802350521 | 14         | 7.197649479 | 146.7940293 |
| stroke-11  | 6.802350521 | 14         | 7.197649479 | 146.7940293 |
| stroke-11  | 6.802350521 | 14         | 7.197649479 | 146.7940293 |
| stroke-12  | 7.667498112 | 14         | 6.332501888 | 80.58848955 |
| stroke-12  | 7.667498112 | 14         | 6.332501888 | 80.58848955 |
| stroke-12  | 7.667498112 | 14         | 6.332501888 | 80.58848955 |
| stroke-13  | 8.38660717  | 14         | 5.61339283  | 48.95528906 |
| stroke-13  | 8.38660717  | 14         | 5.61339283  | 48.95528906 |
| stroke-13  | 8.38660717  | 14         | 5.61339283  | 48.95528906 |
| stroke-14  | 8.721485138 | 14         | 5.278514862 | 38.81425958 |
| stroke-14  | 8.721485138 | 14         | 5.278514862 | 38.81425958 |
| stroke-14  | 8.721485138 | 14         | 5.278514862 | 38.81425958 |
| stroke-15  | 8.169813156 | 14         | 5.830186844 | 56.89329939 |
| stroke-15  | 8.169813156 | 14         | 5.830186844 | 56.89329939 |
| stroke-15  | 8.169813156 | 14         | 5.830186844 | 56.89329939 |
| stroke-16  | 7.699220181 | 14         | 6.300779819 | 78.83584405 |
| stroke-16  | 7.699220181 | 14         | 6.300779819 | 78.83584405 |
| stroke-16  | 7.699220181 | 14         | 6.300779819 | 78.83584405 |
| control-17 | 3.691231489 | 9.64174366 | 5.950512171 | 61.84187562 |
| control-17 | 3.691231489 | 9.64174366 | 5.950512171 | 61.84187562 |
| control-17 | 3.691231489 | 9.64174366 | 5.950512171 | 61.84187562 |
| control-18 | 4.004371643 | 9.64174366 | 5.637372017 | 49.77577995 |
| control-18 | 4.004371643 | 9.64174366 | 5.637372017 | 49.77577995 |
| control-18 | 4.004371643 | 9.64174366 | 5.637372017 | 49.77577995 |
| control-19 | 3.891232729 | 9.64174366 | 5.750510931 | 53.83643339 |
| control-19 | 3.891232729 | 9.64174366 | 5.750510931 | 53.83643339 |
| control-19 | 3.891232729 | 9.64174366 | 5.750510931 | 53.83643339 |
| control-20 | 3.418457031 | 9.64174366 | 6.223286629 | 74.71296071 |
| control-20 | 3.418457031 | 9.64174366 | 6.223286629 | 74.71296071 |
| control-20 | 3.418457031 | 9.64174366 | 6.223286629 | 74.71296071 |
| control-21 | 3.970368147 | 9.64174366 | 5.671375513 | 50.96290152 |
| control-21 | 3.970368147 | 9.64174366 | 5.671375513 | 50.96290152 |
| control-21 | 3.970368147 | 9.64174366 | 5.671375513 | 50.96290152 |
| control-22 | 3.011386156 | 9.64174366 | 6.630357504 | 99.06870605 |
| control-22 | 3.011386156 | 9.64174366 | 6.630357504 | 99.06870605 |
| control-22 | 3.011386156 | 9.64174366 | 6.630357504 | 99.06870605 |
| control-23 | 3.009574175 | 9.64174366 | 6.632169485 | 99.19321151 |
| control-23 | 3.009574175 | 9.64174366 | 6.632169485 | 99.19321151 |
| control-23 | 3.009574175 | 9.64174366 | 6.632169485 | 99.19321151 |

|            |              |            |             |             |
|------------|--------------|------------|-------------|-------------|
| control-24 | 2.522069216  | 9.64174366 | 7.119674444 | 139.0706764 |
| control-24 | 2.522069216  | 9.64174366 | 7.119674444 | 139.0706764 |
| control-24 | 2.522069216  | 9.64174366 | 7.119674444 | 139.0706764 |
| stroke-17  | 4.480847836  | 9.64174366 | 5.160895824 | 35.77539583 |
| stroke-17  | 4.480847836  | 9.64174366 | 5.160895824 | 35.77539583 |
| stroke-17  | 4.480847836  | 9.64174366 | 5.160895824 | 35.77539583 |
| stroke-18  | 3.068679094  | 9.64174366 | 6.573064566 | 95.21154175 |
| stroke-18  | 3.068679094  | 9.64174366 | 6.573064566 | 95.21154175 |
| stroke-18  | 3.068679094  | 9.64174366 | 6.573064566 | 95.21154175 |
| stroke-19  | 4.673705578  | 9.64174366 | 4.968038082 | 31.29885732 |
| stroke-19  | 4.673705578  | 9.64174366 | 4.968038082 | 31.29885732 |
| stroke-19  | 4.673705578  | 9.64174366 | 4.968038082 | 31.29885732 |
| stroke-20  | 1.741176605  | 9.64174366 | 7.900567055 | 238.9503474 |
| stroke-20  | 1.741176605  | 9.64174366 | 7.900567055 | 238.9503474 |
| stroke-20  | 1.741176605  | 9.64174366 | 7.900567055 | 238.9503474 |
| stroke-21  | 5.115838528  | 9.64174366 | 4.525905132 | 23.03738617 |
| stroke-21  | 5.115838528  | 9.64174366 | 4.525905132 | 23.03738617 |
| stroke-21  | 5.115838528  | 9.64174366 | 4.525905132 | 23.03738617 |
| stroke-22  | 5.878671169  | 9.64174366 | 3.763072491 | 13.5768086  |
| stroke-22  | 5.878671169  | 9.64174366 | 3.763072491 | 13.5768086  |
| stroke-22  | 5.878671169  | 9.64174366 | 3.763072491 | 13.5768086  |
| stroke-23  | 5.553426743  | 9.64174366 | 4.088316917 | 17.01006699 |
| stroke-23  | 5.553426743  | 9.64174366 | 4.088316917 | 17.01006699 |
| stroke-23  | 5.553426743  | 9.64174366 | 4.088316917 | 17.01006699 |
| stroke-24  | 1.7467314    | 9.64174366 | 7.895012259 | 238.032088  |
| stroke-24  | 1.7467314    | 9.64174366 | 7.895012259 | 238.032088  |
| stroke-24  | 1.7467314    | 9.64174366 | 7.895012259 | 238.032088  |
| control-25 | 3.40441823   | 9.64174366 | 6.23732543  | 75.44353804 |
| control-25 | 3.40441823   | 9.64174366 | 6.23732543  | 75.44353804 |
| control-25 | 3.40441823   | 9.64174366 | 6.23732543  | 75.44353804 |
| control-26 | 3.270259142  | 9.64174366 | 6.371484518 | 82.79573328 |
| control-26 | 3.270259142  | 9.64174366 | 6.371484518 | 82.79573328 |
| control-26 | 3.270259142  | 9.64174366 | 6.371484518 | 82.79573328 |
| control-27 | 2.84         | 9.64174366 | 6.80174366  | 111.5652298 |
| control-27 | 2.84         | 9.64174366 | 6.80174366  | 111.5652298 |
| control-27 | 2.84         | 9.64174366 | 6.80174366  | 111.5652298 |
| control-28 | 3.990768433  | 9.64174366 | 5.650975227 | 50.24733679 |
| control-28 | 3.990768433  | 9.64174366 | 5.650975227 | 50.24733679 |
| control-28 | 3.990768433  | 9.64174366 | 5.650975227 | 50.24733679 |
| control-29 | 3.75         | 9.64174366 | 5.89174366  | 59.37335202 |
| control-29 | 3.75         | 9.64174366 | 5.89174366  | 59.37335202 |
| control-29 | 3.75         | 9.64174366 | 5.89174366  | 59.37335202 |
| control-30 | 3.008914232  | 9.64174366 | 6.632829428 | 99.23859657 |
| control-30 | 3.008914232  | 9.64174366 | 6.632829428 | 99.23859657 |
| control-30 | 3.008914232  | 9.64174366 | 6.632829428 | 99.23859657 |
| control-31 | 4.410742283  | 9.64174366 | 5.231001377 | 37.55677755 |
| control-31 | 4.410742283  | 9.64174366 | 5.231001377 | 37.55677755 |
| control-31 | 4.410742283  | 9.64174366 | 5.231001377 | 37.55677755 |
| control-32 | 3.27         | 9.64174366 | 6.37174366  | 82.81060668 |
| control-32 | 3.27         | 9.64174366 | 6.37174366  | 82.81060668 |
| control-32 | 3.27         | 9.64174366 | 6.37174366  | 82.81060668 |
| stroke-25  | 3.111193419  | 9.64174366 | 6.530550241 | 92.44672081 |
| stroke-25  | 3.111193419  | 9.64174366 | 6.530550241 | 92.44672081 |
| stroke-25  | 3.111193419  | 9.64174366 | 6.530550241 | 92.44672081 |
| stroke-26  | 4.789713383  | 9.64174366 | 4.852030277 | 28.88062938 |
| stroke-26  | 4.789713383  | 9.64174366 | 4.852030277 | 28.88062938 |
| stroke-26  | 4.789713383  | 9.64174366 | 4.852030277 | 28.88062938 |
| stroke-27  | -0.809007645 | 9.64174366 | 10.4507513  | 1399.553871 |
| stroke-27  | -0.809007645 | 9.64174366 | 10.4507513  | 1399.553871 |
| stroke-27  | -0.809007645 | 9.64174366 | 10.4507513  | 1399.553871 |
| stroke-28  | 4.609135151  | 9.64174366 | 5.032608509 | 32.73151577 |
| stroke-28  | 4.609135151  | 9.64174366 | 5.032608509 | 32.73151577 |
| stroke-28  | 4.609135151  | 9.64174366 | 5.032608509 | 32.73151577 |
| stroke-29  | 1.317329407  | 9.64174366 | 8.324414253 | 320.551923  |
| stroke-29  | 1.317329407  | 9.64174366 | 8.324414253 | 320.551923  |

|           |             |            |             |             |
|-----------|-------------|------------|-------------|-------------|
| stroke-29 | 1.317329407 | 9.64174366 | 8.324414253 | 320.551923  |
| stroke-30 | 1.466571212 | 9.64174366 | 8.175172448 | 289.0494362 |
| stroke-30 | 1.466571212 | 9.64174366 | 8.175172448 | 289.0494362 |
| stroke-30 | 1.466571212 | 9.64174366 | 8.175172448 | 289.0494362 |
| stroke-31 | 1.3802948   | 9.64174366 | 8.26144886  | 306.8625676 |
| stroke-31 | 1.3802948   | 9.64174366 | 8.26144886  | 306.8625676 |
| stroke-31 | 1.3802948   | 9.64174366 | 8.26144886  | 306.8625676 |
| stroke-32 | 3.781365633 | 9.64174366 | 5.860378027 | 58.09644686 |
| stroke-32 | 3.781365633 | 9.64174366 | 5.860378027 | 58.09644686 |
| stroke-32 | 3.781365633 | 9.64174366 | 5.860378027 | 58.09644686 |

| sample     | RQ          | sample    | RQ          |
|------------|-------------|-----------|-------------|
| control-1  | 41.61552054 | stroke-1  | 60.62091235 |
| control-2  | 82.1695005  | stroke-2  | 81.06908475 |
| control-3  | 61.33763668 | stroke-3  | 39.85961603 |
| control-4  | 110.9888174 | stroke-4  | 232.6575192 |
| control-5  | 80.07945246 | stroke-5  | 37.65116182 |
| control-6  | 89.3573769  | stroke-6  | 399.414711  |
| control-7  | 62.19118455 | stroke-7  | 20.95292238 |
| control-8  | 89.99517508 | stroke-8  | 56.4181828  |
| control-9  | 28.10412513 | stroke-9  | 282.7084726 |
| control-10 | 41.588034   | stroke-10 | 625.5183866 |
| control-11 | 80.41995377 | stroke-11 | 146.7940293 |
| control-12 | 55.27448579 | stroke-12 | 80.58848955 |
| control-13 | 20.51001071 | stroke-13 | 48.95528906 |
| control-14 | 145.5480649 | stroke-14 | 38.81425958 |
| control-15 | 82.21295205 | stroke-15 | 56.89329939 |
| control-16 | 47.48866891 | stroke-16 | 78.83584405 |
| control-17 | 61.84187562 | stroke-17 | 35.77539583 |
| control-18 | 49.77577995 | stroke-18 | 95.21154175 |
| control-19 | 53.83643339 | stroke-19 | 31.29885732 |
| control-20 | 74.71296071 | stroke-20 | 238.9503474 |
| control-21 | 50.96290152 | stroke-21 | 23.03738617 |
| control-22 | 99.06870605 | stroke-22 | 13.5768086  |
| control-23 | 99.19321151 | stroke-23 | 17.01006699 |
| control-24 | 139.0706764 | stroke-24 | 238.032088  |
| control-25 | 75.44353804 | stroke-25 | 92.44672081 |
| control-26 | 82.79573328 | stroke-26 | 28.88062938 |
| control-27 | 111.5652298 | stroke-27 | 1399.553871 |
| control-28 | 50.24733679 | stroke-28 | 32.73151577 |
| control-29 | 59.37335202 | stroke-29 | 320.551923  |
| control-30 | 99.23859657 | stroke-30 | 289.0494362 |
| control-31 | 37.55677755 | stroke-31 | 306.8625676 |
| control-32 | 82.81060668 | stroke-32 | 58.09644686 |

Characteristic of AIS patients and healthy controls ( PCR)

| healthy controls | age | Gender | stroke patients | age | Gender |
|------------------|-----|--------|-----------------|-----|--------|
| 1                | 75  | female | 1               | 73  | female |
| 2                | 60  | male   | 2               | 51  | male   |
| 3                | 71  | male   | 3               | 61  | male   |
| 4                | 69  | male   | 4               | 60  | male   |
| 5                | 69  | male   | 5               | 52  | male   |
| 6                | 73  | male   | 6               | 51  | female |
| 7                | 63  | male   | 7               | 75  | female |
| 8                | 62  | male   | 8               | 64  | male   |
| 9                | 64  | male   | 9               | 61  | female |
| 10               | 54  | female | 10              | 67  | male   |
| 11               | 63  | male   | 11              | 52  | male   |
| 12               | 53  | male   | 12              | 59  | female |
| 13               | 62  | male   | 13              | 59  | male   |
| 14               | 63  | male   | 14              | 71  | female |
| 15               | 66  | male   | 15              | 72  | female |
| 16               | 64  | male   | 16              | 74  | female |

|    |    |        |    |    |        |
|----|----|--------|----|----|--------|
| 17 | 81 | female | 17 | 69 | male   |
| 18 | 60 | female | 18 | 76 | male   |
| 19 | 69 | male   | 19 | 60 | male   |
| 20 | 58 | male   | 20 | 76 | female |
| 21 | 63 | female | 21 | 63 | male   |
| 22 | 64 | female | 22 | 77 | female |
| 23 | 73 | female | 23 | 64 | male   |
| 24 | 58 | female | 24 | 61 | male   |
| 25 | 62 | female | 25 | 52 | male   |
| 26 | 55 | female | 26 | 67 | male   |
| 27 | 58 | female | 27 | 71 | female |
| 28 | 63 | female | 28 | 72 | female |
| 29 | 64 | female | 29 | 66 | male   |
| 30 | 58 | female | 30 | 61 | male   |
| 31 | 62 | female | 31 | 72 | male   |
| 32 | 61 | male   | 32 | 59 | female |

RNA-seq

| sample    | RIN values |
|-----------|------------|
| control_1 | 9.4        |
| control_2 | 7.7        |
| control_3 | 9.2        |
| stroke_1  | 8.3        |
| stroke_2  | 9          |
| stroke_3  | 9          |

miR-337-3p interaction with hsa\_circ\_0000607(vps13c)

| miRNAid      | miRNAname      | geneID           | geneName        | geneType | chromosome | start    |
|--------------|----------------|------------------|-----------------|----------|------------|----------|
| MIMAT0000754 | hsa-miR-337-3p | NM_015378        | VPS13D          | circRNA  | chr1       | 12428567 |
| MIMAT0000754 | hsa-miR-337-3p | NM_015378        | VPS13D          | circRNA  | chr1       | 12569392 |
| MIMAT0000754 | hsa-miR-337-3p | NM_012231        | PRDM2           | circRNA  | chr1       | 14095789 |
| MIMAT0000754 | hsa-miR-337-3p | NM_015207        | OTUD3           | circRNA  | chr1       | 20235114 |
| MIMAT0000754 | hsa-miR-337-3p | NM_016287        | HP1BP3          | circRNA  | chr1       | 21071278 |
| MIMAT0000754 | hsa-miR-337-3p | NM_020362        | PITHD1          | circRNA  | chr1       | 24114243 |
| MIMAT0000754 | hsa-miR-337-3p | NM_001166006     | EPB41           | circRNA  | chr1       | 29391851 |
| MIMAT0000754 | hsa-miR-337-3p | NM_001166006     | EPB41           | circRNA  | chr1       | 29422908 |
| MIMAT0000754 | hsa-miR-337-3p | NM_001020658     | PUM1            | circRNA  | chr1       | 31405807 |
| MIMAT0000754 | hsa-miR-337-3p | hsa_circ_0000046 | hsa_circ_001242 | circRNA  | chr1       | 31995101 |
| MIMAT0000754 | hsa-miR-337-3p | NM_152493        | ZNF362          | circRNA  | chr1       | 33765691 |
| MIMAT0000754 | hsa-miR-337-3p | NM_024772        | ZMYM1           | circRNA  | chr1       | 35565808 |
| MIMAT0000754 | hsa-miR-337-3p | NM_005066        | SFPQ            | circRNA  | chr1       | 35649503 |
| MIMAT0000754 | hsa-miR-337-3p | NM_005119        | THRAP3          | circRNA  | chr1       | 36701961 |
| MIMAT0000754 | hsa-miR-337-3p | NM_005857        | ZMPSTE24        | circRNA  | chr1       | 40758958 |
| MIMAT0000754 | hsa-miR-337-3p | NM_001172218     | SCMH1           | circRNA  | chr1       | 41657155 |
| MIMAT0000754 | hsa-miR-337-3p | NM_024664        | PPCS            | circRNA  | chr1       | 42925599 |
| MIMAT0000754 | hsa-miR-337-3p | NM_002482        | NASP            | circRNA  | chr1       | 46083420 |
| MIMAT0000754 | hsa-miR-337-3p | NM_021639        | GPBP1L1         | circRNA  | chr1       | 46093352 |
| MIMAT0000754 | hsa-miR-337-3p | NM_001004339     | ZYG11A          | circRNA  | chr1       | 53329653 |
| MIMAT0000754 | hsa-miR-337-3p | NM_017526        | LEPROT          | circRNA  | chr1       | 65898430 |
| MIMAT0000754 | hsa-miR-337-3p | NM_017526        | LEPROT          | circRNA  | chr1       | 65898909 |
| MIMAT0000754 | hsa-miR-337-3p | NM_006417        | IFI44           | circRNA  | chr1       | 79121047 |
| MIMAT0000754 | hsa-miR-337-3p | NM_001162536     | RBMXL1          | circRNA  | chr1       | 89446400 |
| MIMAT0000754 | hsa-miR-337-3p | NM_001938        | DR1             | circRNA  | chr1       | 93827442 |
| MIMAT0000754 | hsa-miR-337-3p | NM_015976        | SNX7            | circRNA  | chr1       | 99150588 |
| MIMAT0000754 | hsa-miR-337-3p | NM_000028        | AGL             | circRNA  | chr1       | 1E+08    |
| MIMAT0000754 | hsa-miR-337-3p | NM_001918        | DBT             | circRNA  | chr1       | 1.01E+08 |
| MIMAT0000754 | hsa-miR-337-3p | NM_017619        | RNPC3           | circRNA  | chr1       | 1.04E+08 |
| MIMAT0000754 | hsa-miR-337-3p | NM_001010935     | RAP1A           | circRNA  | chr1       | 1.12E+08 |
| MIMAT0000754 | hsa-miR-337-3p | NM_017744        | ST7L            | circRNA  | chr1       | 1.13E+08 |
| MIMAT0000754 | hsa-miR-337-3p | NM_138727        | ST7L            | circRNA  | chr1       | 1.13E+08 |
| MIMAT0000754 | hsa-miR-337-3p | hsa_circ_0000107 | hsa_circ_002024 | circRNA  | chr1       | 1.13E+08 |
| MIMAT0000754 | hsa-miR-337-3p | hsa_circ_0000108 | hsa_circ_001020 | circRNA  | chr1       | 1.13E+08 |
| MIMAT0000754 | hsa-miR-337-3p | NM_018364        | RSBN1           | circRNA  | chr1       | 1.14E+08 |

|              |                |                  |                 |         |      |          |
|--------------|----------------|------------------|-----------------|---------|------|----------|
| MIMAT0000754 | hsa-miR-337-3p | NM_198459        | DENND2C         | circRNA | chr1 | 1.15E+08 |
| MIMAT0000754 | hsa-miR-337-3p | NM_002524        | NRAS            | circRNA | chr1 | 1.15E+08 |
| MIMAT0000754 | hsa-miR-337-3p | NM_006699        | MAN1A2          | circRNA | chr1 | 1.18E+08 |
| MIMAT0000754 | hsa-miR-337-3p | hsa_circ_0000116 | hsa_circ_002089 | circRNA | chr1 | 1.18E+08 |
| MIMAT0000754 | hsa-miR-337-3p | hsa_circ_0000117 | hsa_circ_001812 | circRNA | chr1 | 1.18E+08 |
| MIMAT0000754 | hsa-miR-337-3p | hsa_circ_0000118 | hsa_circ_002173 | circRNA | chr1 | 1.18E+08 |
| MIMAT0000754 | hsa-miR-337-3p | hsa_circ_0000119 | hsa_circ_002057 | circRNA | chr1 | 1.18E+08 |
| MIMAT0000754 | hsa-miR-337-3p | hsa_circ_0000120 | hsa_circ_001022 | circRNA | chr1 | 1.18E+08 |
| MIMAT0000754 | hsa-miR-337-3p | NM_017686        | GDAP2           | circRNA | chr1 | 1.18E+08 |
| MIMAT0000754 | hsa-miR-337-3p | NM_001037675     | NBPF9           | circRNA | chr1 | 1.45E+08 |
| MIMAT0000754 | hsa-miR-337-3p | NM_001039703     | NBPF10          | circRNA | chr1 | 1.45E+08 |
| MIMAT0000754 | hsa-miR-337-3p | NM_004892        | SEC22B          | circRNA | chr1 | 1.45E+08 |
| MIMAT0000754 | hsa-miR-337-3p | NM_001039703     | NBPF10          | circRNA | chr1 | 1.46E+08 |
| MIMAT0000754 | hsa-miR-337-3p | NM_001039703     | NBPF10          | circRNA | chr1 | 1.46E+08 |
| MIMAT0000754 | hsa-miR-337-3p | NM_014455        | RNF115          | circRNA | chr1 | 1.46E+08 |
| MIMAT0000754 | hsa-miR-337-3p | hsa_circ_0000125 | hsa_circ_001024 | circRNA | chr1 | 1.46E+08 |
| MIMAT0000754 | hsa-miR-337-3p | NM_001039703     | NBPF10          | circRNA | chr1 | 1.46E+08 |
| MIMAT0000754 | hsa-miR-337-3p | NM_001097616     | GPR89C          | circRNA | chr1 | 1.46E+08 |
| MIMAT0000754 | hsa-miR-337-3p | NM_004326        | BCL9            | circRNA | chr1 | 1.46E+08 |
| MIMAT0000754 | hsa-miR-337-3p | NM_005399        | PRKAB2          | circRNA | chr1 | 1.47E+08 |
| MIMAT0000754 | hsa-miR-337-3p | NM_001097616     | GPR89C          | circRNA | chr1 | 1.47E+08 |
| MIMAT0000754 | hsa-miR-337-3p | NM_004284        | CHD1L           | circRNA | chr1 | 1.47E+08 |
| MIMAT0000754 | hsa-miR-337-3p | NM_004326        | BCL9            | circRNA | chr1 | 1.47E+08 |
| MIMAT0000754 | hsa-miR-337-3p | NM_030920        | ANP32E          | circRNA | chr1 | 1.5E+08  |
| MIMAT0000754 | hsa-miR-337-3p | NM_021960        | MCL1            | circRNA | chr1 | 1.51E+08 |
| MIMAT0000754 | hsa-miR-337-3p | NM_020127        | TUFT1           | circRNA | chr1 | 1.52E+08 |
| MIMAT0000754 | hsa-miR-337-3p | NM_020672        | S100A14         | circRNA | chr1 | 1.54E+08 |
| MIMAT0000754 | hsa-miR-337-3p | NM_001098616     | C1orf43         | circRNA | chr1 | 1.54E+08 |
| MIMAT0000754 | hsa-miR-337-3p | NM_014847        | UBAP2L          | circRNA | chr1 | 1.54E+08 |
| MIMAT0000754 | hsa-miR-337-3p | NM_018489        | ASH1L           | circRNA | chr1 | 1.55E+08 |
| MIMAT0000754 | hsa-miR-337-3p | NM_014949        | KIAA0907        | circRNA | chr1 | 1.56E+08 |
| MIMAT0000754 | hsa-miR-337-3p | NM_016406        | UFC1            | circRNA | chr1 | 1.61E+08 |
| MIMAT0000754 | hsa-miR-337-3p | NM_199344        | SFT2D2          | circRNA | chr1 | 1.68E+08 |
| MIMAT0000754 | hsa-miR-337-3p | NM_022457        | RFWD2           | circRNA | chr1 | 1.76E+08 |
| MIMAT0000754 | hsa-miR-337-3p | NM_014810        | CEP350          | circRNA | chr1 | 1.8E+08  |
| MIMAT0000754 | hsa-miR-337-3p | NM_005819        | STX6            | circRNA | chr1 | 1.81E+08 |
| MIMAT0000754 | hsa-miR-337-3p | NR_023349        | TSEN15          | circRNA | chr1 | 1.84E+08 |
| MIMAT0000754 | hsa-miR-337-3p | NM_024529        | CDC73           | circRNA | chr1 | 1.93E+08 |
| MIMAT0000754 | hsa-miR-337-3p | NM_024529        | CDC73           | circRNA | chr1 | 1.93E+08 |
| MIMAT0000754 | hsa-miR-337-3p | NM_024529        | CDC73           | circRNA | chr1 | 1.93E+08 |
| MIMAT0000754 | hsa-miR-337-3p | NM_001195215     | DENND1B         | circRNA | chr1 | 1.97E+08 |
| MIMAT0000754 | hsa-miR-337-3p | NM_006618        | KDM5B           | circRNA | chr1 | 2.03E+08 |
| MIMAT0000754 | hsa-miR-337-3p | NM_006763        | BTG2            | circRNA | chr1 | 2.03E+08 |
| MIMAT0000754 | hsa-miR-337-3p | NM_002393        | MDM4            | circRNA | chr1 | 2.05E+08 |
| MIMAT0000754 | hsa-miR-337-3p | NM_015375        | DSTYK           | circRNA | chr1 | 2.05E+08 |
| MIMAT0000754 | hsa-miR-337-3p | NM_015375        | DSTYK           | circRNA | chr1 | 2.05E+08 |
| MIMAT0000754 | hsa-miR-337-3p | NM_014002        | IKBKE           | circRNA | chr1 | 2.07E+08 |
| MIMAT0000754 | hsa-miR-337-3p | NM_018566        | YOD1            | circRNA | chr1 | 2.07E+08 |
| MIMAT0000754 | hsa-miR-337-3p | NM_014053        | FLVCR1          | circRNA | chr1 | 2.13E+08 |
| MIMAT0000754 | hsa-miR-337-3p | NM_012424        | RPS6KC1         | circRNA | chr1 | 2.13E+08 |
| MIMAT0000754 | hsa-miR-337-3p | NM_005401        | PTPN14          | circRNA | chr1 | 2.15E+08 |
| MIMAT0000754 | hsa-miR-337-3p | NM_018060        | IARS2           | circRNA | chr1 | 2.2E+08  |
| MIMAT0000754 | hsa-miR-337-3p | TCONS_12_000018  | TCONS_12_000018 | circRNA | chr1 | 2.23E+08 |
| MIMAT0000754 | hsa-miR-337-3p | TCONS_12_000018  | TCONS_12_000018 | circRNA | chr1 | 2.23E+08 |
| MIMAT0000754 | hsa-miR-337-3p | TCONS_12_000018  | TCONS_12_000018 | circRNA | chr1 | 2.24E+08 |
| MIMAT0000754 | hsa-miR-337-3p | NM_015176        | FBXO28          | circRNA | chr1 | 2.24E+08 |
| MIMAT0000754 | hsa-miR-337-3p | NR_033184        | ZNF678          | circRNA | chr1 | 2.28E+08 |
| MIMAT0000754 | hsa-miR-337-3p | NM_014236        | GNPAT           | circRNA | chr1 | 2.31E+08 |
| MIMAT0000754 | hsa-miR-337-3p | NM_014765        | TOMM20          | circRNA | chr1 | 2.35E+08 |
| MIMAT0000754 | hsa-miR-337-3p | NM_005465        | AKT3            | circRNA | chr1 | 2.44E+08 |
| MIMAT0000754 | hsa-miR-337-3p | NM_001167740     | SMYD3           | circRNA | chr1 | 2.46E+08 |
| MIMAT0000754 | hsa-miR-337-3p | NM_134421        | HPCAL1          | circRNA | chr2 | 10531492 |
| MIMAT0000754 | hsa-miR-337-3p | NM_024894        | NOL10           | circRNA | chr2 | 10742957 |
| MIMAT0000754 | hsa-miR-337-3p | NM_015317        | PUM2            | circRNA | chr2 | 20530798 |
| MIMAT0000754 | hsa-miR-337-3p | NM_147223        | NCOA1           | circRNA | chr2 | 24756119 |

|              |                |                  |                 |         |      |          |
|--------------|----------------|------------------|-----------------|---------|------|----------|
| MIMAT0000754 | hsa-miR-337-3p | NM_007266        | GPN1            | circRNA | chr2 | 27873601 |
| MIMAT0000754 | hsa-miR-337-3p | NM_015955        | MEMO1           | circRNA | chr2 | 32145899 |
| MIMAT0000754 | hsa-miR-337-3p | NM_016441        | CRIM1           | circRNA | chr2 | 36776902 |
| MIMAT0000754 | hsa-miR-337-3p | NM_016441        | CRIM1           | circRNA | chr2 | 36778005 |
| MIMAT0000754 | hsa-miR-337-3p | NM_020744        | MTA3            | circRNA | chr2 | 42938893 |
| MIMAT0000754 | hsa-miR-337-3p | NM_001033557     | PPM1B           | circRNA | chr2 | 44428793 |
| MIMAT0000754 | hsa-miR-337-3p | NM_177968        | PPM1B           | circRNA | chr2 | 44428793 |
| MIMAT0000754 | hsa-miR-337-3p | NM_005400        | PRKCE           | circRNA | chr2 | 45914837 |
| MIMAT0000754 | hsa-miR-337-3p | NM_014614        | PSME4           | circRNA | chr2 | 54161771 |
| MIMAT0000754 | hsa-miR-337-3p | NM_006759        | UGP2            | circRNA | chr2 | 64112850 |
| MIMAT0000754 | hsa-miR-337-3p | NM_014755        | SERTAD2         | circRNA | chr2 | 64862824 |
| MIMAT0000754 | hsa-miR-337-3p | NM_181784        | SPRED2          | circRNA | chr2 | 65540089 |
| MIMAT0000754 | hsa-miR-337-3p | NM_017880        | C2orf42         | circRNA | chr2 | 70392693 |
| MIMAT0000754 | hsa-miR-337-3p | NM_022173        | TIA1            | circRNA | chr2 | 70436699 |
| MIMAT0000754 | hsa-miR-337-3p | NM_016297        | PCYOX1          | circRNA | chr2 | 70507694 |
| MIMAT0000754 | hsa-miR-337-3p | NM_144993        | TET3            | circRNA | chr2 | 74331455 |
| MIMAT0000754 | hsa-miR-337-3p | NM_015425        | POLR1A          | circRNA | chr2 | 86292586 |
| MIMAT0000754 | hsa-miR-337-3p | NM_144706        | C2orf15         | circRNA | chr2 | 99802262 |
| MIMAT0000754 | hsa-miR-337-3p | NM_002518        | NPAS2           | circRNA | chr2 | 1.01E+08 |
| MIMAT0000754 | hsa-miR-337-3p | NM_006267        | RANBP2          | circRNA | chr2 | 1.09E+08 |
| MIMAT0000754 | hsa-miR-337-3p | NM_182588        | RGPD4           | circRNA | chr2 | 1.09E+08 |
| MIMAT0000754 | hsa-miR-337-3p | NM_006267        | RANBP2          | circRNA | chr2 | 1.09E+08 |
| MIMAT0000754 | hsa-miR-337-3p | NM_182588        | RGPD4           | circRNA | chr2 | 1.09E+08 |
| MIMAT0000754 | hsa-miR-337-3p | NM_006267        | RANBP2          | circRNA | chr2 | 1.09E+08 |
| MIMAT0000754 | hsa-miR-337-3p | NM_182588        | RGPD4           | circRNA | chr2 | 1.09E+08 |
| MIMAT0000754 | hsa-miR-337-3p | NM_006267        | RANBP2          | circRNA | chr2 | 1.09E+08 |
| MIMAT0000754 | hsa-miR-337-3p | NM_182588        | RGPD4           | circRNA | chr2 | 1.09E+08 |
| MIMAT0000754 | hsa-miR-337-3p | NM_006267        | RANBP2          | circRNA | chr2 | 1.09E+08 |
| MIMAT0000754 | hsa-miR-337-3p | NM_182588        | RGPD4           | circRNA | chr2 | 1.09E+08 |
| MIMAT0000754 | hsa-miR-337-3p | NM_006267        | RANBP2          | circRNA | chr2 | 1.09E+08 |
| MIMAT0000754 | hsa-miR-337-3p | NM_182588        | RGPD4           | circRNA | chr2 | 1.09E+08 |
| MIMAT0000754 | hsa-miR-337-3p | NM_022336        | EDAR            | circRNA | chr2 | 1.1E+08  |
| MIMAT0000754 | hsa-miR-337-3p | NM_001037866     | RGPD6           | circRNA | chr2 | 1.13E+08 |
| MIMAT0000754 | hsa-miR-337-3p | NM_001164463     | RGPD8           | circRNA | chr2 | 1.13E+08 |
| MIMAT0000754 | hsa-miR-337-3p | NM_022662        | ANAPC1          | circRNA | chr2 | 1.13E+08 |
| MIMAT0000754 | hsa-miR-337-3p | NM_001037866     | RGPD6           | circRNA | chr2 | 1.13E+08 |
| MIMAT0000754 | hsa-miR-337-3p | NM_001164463     | RGPD8           | circRNA | chr2 | 1.13E+08 |
| MIMAT0000754 | hsa-miR-337-3p | NM_001037866     | RGPD6           | circRNA | chr2 | 1.13E+08 |
| MIMAT0000754 | hsa-miR-337-3p | NM_001164463     | RGPD8           | circRNA | chr2 | 1.13E+08 |
| MIMAT0000754 | hsa-miR-337-3p | NM_001037866     | RGPD6           | circRNA | chr2 | 1.13E+08 |
| MIMAT0000754 | hsa-miR-337-3p | NM_001164463     | RGPD8           | circRNA | chr2 | 1.13E+08 |
| MIMAT0000754 | hsa-miR-337-3p | NM_022662        | ANAPC1          | circRNA | chr2 | 1.13E+08 |
| MIMAT0000754 | hsa-miR-337-3p | NM_019014        | POLR1B          | circRNA | chr2 | 1.13E+08 |
| MIMAT0000754 | hsa-miR-337-3p | NM_025181        | SLC35F5         | circRNA | chr2 | 1.14E+08 |
| MIMAT0000754 | hsa-miR-337-3p | NM_025181        | SLC35F5         | circRNA | chr2 | 1.15E+08 |
| MIMAT0000754 | hsa-miR-337-3p | NM_001006622     | WDR33           | circRNA | chr2 | 1.29E+08 |
| MIMAT0000754 | hsa-miR-337-3p | NM_001006622     | WDR33           | circRNA | chr2 | 1.29E+08 |
| MIMAT0000754 | hsa-miR-337-3p | NM_001006623     | WDR33           | circRNA | chr2 | 1.29E+08 |
| MIMAT0000754 | hsa-miR-337-3p | NM_018383        | WDR33           | circRNA | chr2 | 1.29E+08 |
| MIMAT0000754 | hsa-miR-337-3p | NM_014607        | UBXN4           | circRNA | chr2 | 1.37E+08 |
| MIMAT0000754 | hsa-miR-337-3p | NM_015702        | MMADHC          | circRNA | chr2 | 1.5E+08  |
| MIMAT0000754 | hsa-miR-337-3p | NM_003628        | PKP4            | circRNA | chr2 | 1.59E+08 |
| MIMAT0000754 | hsa-miR-337-3p | NM_022826        | 43897           | circRNA | chr2 | 1.61E+08 |
| MIMAT0000754 | hsa-miR-337-3p | NM_004482        | GALNT3          | circRNA | chr2 | 1.67E+08 |
| MIMAT0000754 | hsa-miR-337-3p | NM_024843        | CYBRD1          | circRNA | chr2 | 1.72E+08 |
| MIMAT0000754 | hsa-miR-337-3p | NM_002610        | PDK1            | circRNA | chr2 | 1.73E+08 |
| MIMAT0000754 | hsa-miR-337-3p | NM_002610        | PDK1            | circRNA | chr2 | 1.73E+08 |
| MIMAT0000754 | hsa-miR-337-3p | NM_133378        | TTN             | circRNA | chr2 | 1.79E+08 |
| MIMAT0000754 | hsa-miR-337-3p | NM_014905        | GLS             | circRNA | chr2 | 1.92E+08 |
| MIMAT0000754 | hsa-miR-337-3p | NM_015049        | TRAK2           | circRNA | chr2 | 2.02E+08 |
| MIMAT0000754 | hsa-miR-337-3p | NM_199229        | RPE             | circRNA | chr2 | 2.11E+08 |
| MIMAT0000754 | hsa-miR-337-3p | NM_001105537     | ZNF142          | circRNA | chr2 | 2.2E+08  |
| MIMAT0000754 | hsa-miR-337-3p | NM_004438        | EPHA4           | circRNA | chr2 | 2.22E+08 |
| MIMAT0000754 | hsa-miR-337-3p | NM_004504        | AGFG1           | circRNA | chr2 | 2.28E+08 |
| MIMAT0000754 | hsa-miR-337-3p | NM_138402        | SP140L          | circRNA | chr2 | 2.31E+08 |
| MIMAT0000754 | hsa-miR-337-3p | hsa_circ_0001105 | hsa_circ_001735 | circRNA | chr2 | 2.31E+08 |
| MIMAT0000754 | hsa-miR-337-3p | hsa_circ_0001106 | hsa_circ_001283 | circRNA | chr2 | 2.31E+08 |

|              |                |                  |                  |         |      |          |
|--------------|----------------|------------------|------------------|---------|------|----------|
| MIMAT0000754 | hsa-miR-337-3p | NM_182760        | SUMF1            | circRNA | chr3 | 4195095  |
| MIMAT0000754 | hsa-miR-337-3p | NM_182760        | SUMF1            | circRNA | chr3 | 4237517  |
| MIMAT0000754 | hsa-miR-337-3p | NM_001099952     | ITPR1            | circRNA | chr3 | 4722246  |
| MIMAT0000754 | hsa-miR-337-3p | NM_001168272     | ITPR1            | circRNA | chr3 | 4722246  |
| MIMAT0000754 | hsa-miR-337-3p | NM_003670        | BHLHE40          | circRNA | chr3 | 5025563  |
| MIMAT0000754 | hsa-miR-337-3p | NM_001080517     | SETD5            | circRNA | chr3 | 9478257  |
| MIMAT0000754 | hsa-miR-337-3p | NM_001145395     | TSEN2            | circRNA | chr3 | 12581058 |
| MIMAT0000754 | hsa-miR-337-3p | NM_033083        | EAF1             | circRNA | chr3 | 15482575 |
| MIMAT0000754 | hsa-miR-337-3p | NM_000060        | BTD              | circRNA | chr3 | 15670710 |
| MIMAT0000754 | hsa-miR-337-3p | NM_003615        | SLC4A7           | circRNA | chr3 | 27422857 |
| MIMAT0000754 | hsa-miR-337-3p | NM_182523        | CMC1             | circRNA | chr3 | 28296636 |
| MIMAT0000754 | hsa-miR-337-3p | NM_006371        | CRTAP            | circRNA | chr3 | 33171471 |
| MIMAT0000754 | hsa-miR-337-3p | NM_003149        | STAC             | circRNA | chr3 | 36588697 |
| MIMAT0000754 | hsa-miR-337-3p | NR_024024        | ACAA1            | circRNA | chr3 | 38164361 |
| MIMAT0000754 | hsa-miR-337-3p | NM_003420        | ZNF35            | circRNA | chr3 | 44692518 |
| MIMAT0000754 | hsa-miR-337-3p | NM_014966        | DHX30            | circRNA | chr3 | 47890982 |
| MIMAT0000754 | hsa-miR-337-3p | NM_001789        | CDC25A           | circRNA | chr3 | 48199589 |
| MIMAT0000754 | hsa-miR-337-3p | NM_001789        | CDC25A           | circRNA | chr3 | 48209347 |
| MIMAT0000754 | hsa-miR-337-3p | NM_004947        | DOCK3            | circRNA | chr3 | 51420219 |
| MIMAT0000754 | hsa-miR-337-3p | NM_000720        | CACNA1D          | circRNA | chr3 | 53699768 |
| MIMAT0000754 | hsa-miR-337-3p | NM_003392        | WNT5A            | circRNA | chr3 | 55501357 |
| MIMAT0000754 | hsa-miR-337-3p | NM_003392        | WNT5A            | circRNA | chr3 | 55513540 |
| MIMAT0000754 | hsa-miR-337-3p | NM_002841        | PTPRG            | circRNA | chr3 | 61594800 |
| MIMAT0000754 | hsa-miR-337-3p | NM_016206        | VGLL3            | circRNA | chr3 | 86991921 |
| MIMAT0000754 | hsa-miR-337-3p | NM_032359        | C3orf26          | circRNA | chr3 | 99575290 |
| MIMAT0000754 | hsa-miR-337-3p | NM_032359        | C3orf26          | circRNA | chr3 | 99625227 |
| MIMAT0000754 | hsa-miR-337-3p | NR_033437        | UMPS             | circRNA | chr3 | 1.24E+08 |
| MIMAT0000754 | hsa-miR-337-3p | NM_020733        | HEG1             | circRNA | chr3 | 1.25E+08 |
| MIMAT0000754 | hsa-miR-337-3p | NM_024628        | SLC12A8          | circRNA | chr3 | 1.25E+08 |
| MIMAT0000754 | hsa-miR-337-3p | NM_013336        | SEC61A1          | circRNA | chr3 | 1.28E+08 |
| MIMAT0000754 | hsa-miR-337-3p | NM_006506        | RASA2            | circRNA | chr3 | 1.41E+08 |
| MIMAT0000754 | hsa-miR-337-3p | NM_006506        | RASA2            | circRNA | chr3 | 1.41E+08 |
| MIMAT0000754 | hsa-miR-337-3p | NM_001080415     | U2SURP           | circRNA | chr3 | 1.43E+08 |
| MIMAT0000754 | hsa-miR-337-3p | NM_016094        | COMMD2           | circRNA | chr3 | 1.49E+08 |
| MIMAT0000754 | hsa-miR-337-3p | NM_024947        | PHC3             | circRNA | chr3 | 1.7E+08  |
| MIMAT0000754 | hsa-miR-337-3p | NM_005414        | SKIL             | circRNA | chr3 | 1.7E+08  |
| MIMAT0000754 | hsa-miR-337-3p | NM_024665        | TBL1XR1          | circRNA | chr3 | 1.77E+08 |
| MIMAT0000754 | hsa-miR-337-3p | NM_024665        | TBL1XR1          | circRNA | chr3 | 1.77E+08 |
| MIMAT0000754 | hsa-miR-337-3p | NM_022470        | ZMAT3            | circRNA | chr3 | 1.79E+08 |
| MIMAT0000754 | hsa-miR-337-3p | NM_152240        | ZMAT3            | circRNA | chr3 | 1.79E+08 |
| MIMAT0000754 | hsa-miR-337-3p | NM_021629        | GNB4             | circRNA | chr3 | 1.79E+08 |
| MIMAT0000754 | hsa-miR-337-3p | NM_004423        | DVL3             | circRNA | chr3 | 1.84E+08 |
| MIMAT0000754 | hsa-miR-337-3p | NM_004593        | TRA2B            | circRNA | chr3 | 1.86E+08 |
| MIMAT0000754 | hsa-miR-337-3p | NM_016306        | DNAJB11          | circRNA | chr3 | 1.86E+08 |
| MIMAT0000754 | hsa-miR-337-3p | NM_173216        | ST6GAL1          | circRNA | chr3 | 1.87E+08 |
| MIMAT0000754 | hsa-miR-337-3p | hsa_circ_0068511 | hsa_circ_0068511 | circRNA | chr3 | 1.89E+08 |
| MIMAT0000754 | hsa-miR-337-3p | hsa_circ_0068512 | hsa_circ_0068512 | circRNA | chr3 | 1.89E+08 |
| MIMAT0000754 | hsa-miR-337-3p | NM_012287        | ACAP2            | circRNA | chr3 | 1.95E+08 |
| MIMAT0000754 | hsa-miR-337-3p | NM_001145642     | KIAA0226         | circRNA | chr3 | 1.97E+08 |
| MIMAT0000754 | hsa-miR-337-3p | NM_005255        | GAK              | circRNA | chr4 | 905518   |
| MIMAT0000754 | hsa-miR-337-3p | NM_004249        | RAB28            | circRNA | chr4 | 13481087 |
| MIMAT0000754 | hsa-miR-337-3p | NM_001358        | DHX15            | circRNA | chr4 | 24571905 |
| MIMAT0000754 | hsa-miR-337-3p | NM_001085400     | RELL1            | circRNA | chr4 | 37612911 |
| MIMAT0000754 | hsa-miR-337-3p | NM_001085400     | RELL1            | circRNA | chr4 | 37613179 |
| MIMAT0000754 | hsa-miR-337-3p | NM_001204747     | RFC1             | circRNA | chr4 | 39289991 |
| MIMAT0000754 | hsa-miR-337-3p | NM_018177        | N4BP2            | circRNA | chr4 | 40158921 |
| MIMAT0000754 | hsa-miR-337-3p | NM_003215        | TEC              | circRNA | chr4 | 48138775 |
| MIMAT0000754 | hsa-miR-337-3p | NM_015030        | FRYL             | circRNA | chr4 | 48507580 |
| MIMAT0000754 | hsa-miR-337-3p | NM_001134937     | FIP1L1           | circRNA | chr4 | 54249993 |
| MIMAT0000754 | hsa-miR-337-3p | NM_030917        | FIP1L1           | circRNA | chr4 | 54249993 |
| MIMAT0000754 | hsa-miR-337-3p | hsa_circ_0001411 | hsa_circ_002121  | circRNA | chr4 | 54249993 |
| MIMAT0000754 | hsa-miR-337-3p | NM_004898        | CLOCK            | circRNA | chr4 | 56325336 |
| MIMAT0000754 | hsa-miR-337-3p | NM_000938        | POLR2B           | circRNA | chr4 | 57860888 |
| MIMAT0000754 | hsa-miR-337-3p | NM_032217        | ANKRD17          | circRNA | chr4 | 74038015 |
| MIMAT0000754 | hsa-miR-337-3p | NM_025074        | FRAS1            | circRNA | chr4 | 79464873 |

|              |                |                  |                 |         |      |          |
|--------------|----------------|------------------|-----------------|---------|------|----------|
| MIMAT0000754 | hsa-miR-337-3p | NM_031370        | HNRNPD          | circRNA | chr4 | 83280776 |
| MIMAT0000754 | hsa-miR-337-3p | hsa_circ_0001420 | hsa_circ_001161 | circRNA | chr4 | 83280776 |
| MIMAT0000754 | hsa-miR-337-3p | NM_022154        | SLC39A8         | circRNA | chr4 | 1.03E+08 |
| MIMAT0000754 | hsa-miR-337-3p | NM_001127208     | TET2            | circRNA | chr4 | 1.06E+08 |
| MIMAT0000754 | hsa-miR-337-3p | NM_001031720     | GSTCD           | circRNA | chr4 | 1.07E+08 |
| MIMAT0000754 | hsa-miR-337-3p | NM_024751        | GSTCD           | circRNA | chr4 | 1.07E+08 |
| MIMAT0000754 | hsa-miR-337-3p | NM_001100389     | TMEM192         | circRNA | chr4 | 1.66E+08 |
| MIMAT0000754 | hsa-miR-337-3p | NM_004346        | CASP3           | circRNA | chr4 | 1.86E+08 |
| MIMAT0000754 | hsa-miR-337-3p | NM_007030        | TPPP            | circRNA | chr5 | 661182   |
| MIMAT0000754 | hsa-miR-337-3p | NM_015325        | KIAA0947        | circRNA | chr5 | 5461512  |
| MIMAT0000754 | hsa-miR-337-3p | NM_001040446     | MTMR12          | circRNA | chr5 | 32271981 |
| MIMAT0000754 | hsa-miR-337-3p | NM_006713        | SUB1            | circRNA | chr5 | 32603318 |
| MIMAT0000754 | hsa-miR-337-3p | NM_023073        | C5orf42         | circRNA | chr5 | 37183050 |
| MIMAT0000754 | hsa-miR-337-3p | NM_023073        | C5orf42         | circRNA | chr5 | 37226947 |
| MIMAT0000754 | hsa-miR-337-3p | NM_012382        | TTC33           | circRNA | chr5 | 40714290 |
| MIMAT0000754 | hsa-miR-337-3p | NM_002184        | IL6ST           | circRNA | chr5 | 55259205 |
| MIMAT0000754 | hsa-miR-337-3p | NM_001253699     | ERBB2IP         | circRNA | chr5 | 65321360 |
| MIMAT0000754 | hsa-miR-337-3p | NM_139168        | SREK1           | circRNA | chr5 | 65474680 |
| MIMAT0000754 | hsa-miR-337-3p | NM_001098728     | GTF2H2C         | circRNA | chr5 | 69707200 |
| MIMAT0000754 | hsa-miR-337-3p | NM_017411        | SMN2            | circRNA | chr5 | 69707200 |
| MIMAT0000754 | hsa-miR-337-3p | NR_033417        | GTF2H2B         | circRNA | chr5 | 69707200 |
| MIMAT0000754 | hsa-miR-337-3p | TCONS_12_000234  | TCONS_12_000234 | circRNA | chr5 | 69707200 |
| MIMAT0000754 | hsa-miR-337-3p | NM_005909        | MAP1B           | circRNA | chr5 | 71502072 |
| MIMAT0000754 | hsa-miR-337-3p | NM_138782        | FCHO2           | circRNA | chr5 | 72311487 |
| MIMAT0000754 | hsa-miR-337-3p | NM_138782        | FCHO2           | circRNA | chr5 | 72384586 |
| MIMAT0000754 | hsa-miR-337-3p | NM_015566        | FAM169A         | circRNA | chr5 | 74149210 |
| MIMAT0000754 | hsa-miR-337-3p | NM_004272        | HOMER1          | circRNA | chr5 | 78752707 |
| MIMAT0000754 | hsa-miR-337-3p | NM_014639        | TTC37           | circRNA | chr5 | 94859435 |
| MIMAT0000754 | hsa-miR-337-3p | NM_012081        | ELL2            | circRNA | chr5 | 95221427 |
| MIMAT0000754 | hsa-miR-337-3p | NM_012081        | ELL2            | circRNA | chr5 | 95264457 |
| MIMAT0000754 | hsa-miR-337-3p | NM_001012761     | RGMB            | circRNA | chr5 | 98131527 |
| MIMAT0000754 | hsa-miR-337-3p | NM_015216        | PPIP5K2         | circRNA | chr5 | 1.03E+08 |
| MIMAT0000754 | hsa-miR-337-3p | NM_152624        | DCP2            | circRNA | chr5 | 1.12E+08 |
| MIMAT0000754 | hsa-miR-337-3p | NM_016144        | COMMD10         | circRNA | chr5 | 1.16E+08 |
| MIMAT0000754 | hsa-miR-337-3p | NM_014350        | TNFAIP8         | circRNA | chr5 | 1.19E+08 |
| MIMAT0000754 | hsa-miR-337-3p | NM_133372        | FNIP1           | circRNA | chr5 | 1.31E+08 |
| MIMAT0000754 | hsa-miR-337-3p | NM_014423        | AFF4            | circRNA | chr5 | 1.32E+08 |
| MIMAT0000754 | hsa-miR-337-3p | NM_001135586     | C5orf24         | circRNA | chr5 | 1.34E+08 |
| MIMAT0000754 | hsa-miR-337-3p | TCONS_00010097   | TCONS_00010097  | circRNA | chr5 | 1.35E+08 |
| MIMAT0000754 | hsa-miR-337-3p | TCONS_00010097   | TCONS_00010097  | circRNA | chr5 | 1.35E+08 |
| MIMAT0000754 | hsa-miR-337-3p | NM_001001419     | SMAD5           | circRNA | chr5 | 1.36E+08 |
| MIMAT0000754 | hsa-miR-337-3p | NM_001001419     | SMAD5           | circRNA | chr5 | 1.36E+08 |
| MIMAT0000754 | hsa-miR-337-3p | NM_181838        | UBE2D2          | circRNA | chr5 | 1.39E+08 |
| MIMAT0000754 | hsa-miR-337-3p | NM_017872        | THG1L           | circRNA | chr5 | 1.57E+08 |
| MIMAT0000754 | hsa-miR-337-3p | NM_022897        | RANBP17         | circRNA | chr5 | 1.7E+08  |
| MIMAT0000754 | hsa-miR-337-3p | NM_022897        | RANBP17         | circRNA | chr5 | 1.71E+08 |
| MIMAT0000754 | hsa-miR-337-3p | NM_005520        | HNRNPH1         | circRNA | chr5 | 1.79E+08 |
| MIMAT0000754 | hsa-miR-337-3p | NM_005520        | HNRNPH1         | circRNA | chr5 | 1.79E+08 |
| MIMAT0000754 | hsa-miR-337-3p | NM_001195291     | SERPINB6        | circRNA | chr6 | 2949240  |
| MIMAT0000754 | hsa-miR-337-3p | NM_016495        | TBC1D7          | circRNA | chr6 | 13300671 |
| MIMAT0000754 | hsa-miR-337-3p | NM_000332        | ATXN1           | circRNA | chr6 | 16303848 |
| MIMAT0000754 | hsa-miR-337-3p | NM_016255        | FAM8A1          | circRNA | chr6 | 17611364 |
| MIMAT0000754 | hsa-miR-337-3p | NM_001080480     | MBOAT1          | circRNA | chr6 | 20101988 |
| MIMAT0000754 | hsa-miR-337-3p | NM_007271        | STK38           | circRNA | chr6 | 36475306 |
| MIMAT0000754 | hsa-miR-337-3p | NM_152734        | C6orf89         | circRNA | chr6 | 36895184 |
| MIMAT0000754 | hsa-miR-337-3p | NM_001243186     | PIM1            | circRNA | chr6 | 37143010 |
| MIMAT0000754 | hsa-miR-337-3p | NM_002648        | PIM1            | circRNA | chr6 | 37143010 |
| MIMAT0000754 | hsa-miR-337-3p | NM_018322        | C6orf64         | circRNA | chr6 | 39073124 |
| MIMAT0000754 | hsa-miR-337-3p | NM_001184801     | UBR2            | circRNA | chr6 | 42594458 |
| MIMAT0000754 | hsa-miR-337-3p | NM_015349        | KIAA0240        | circRNA | chr6 | 42773139 |
| MIMAT0000754 | hsa-miR-337-3p | NM_001498        | GCLC            | circRNA | chr6 | 53372391 |
| MIMAT0000754 | hsa-miR-337-3p | NM_001123226     | MTO1            | circRNA | chr6 | 74183192 |
| MIMAT0000754 | hsa-miR-337-3p | NM_133645        | MTO1            | circRNA | chr6 | 74183192 |
| MIMAT0000754 | hsa-miR-337-3p | NM_004370        | COL12A1         | circRNA | chr6 | 75847193 |
| MIMAT0000754 | hsa-miR-337-3p | NM_004370        | COL12A1         | circRNA | chr6 | 75901937 |

|              |                |                  |                  |         |      |          |
|--------------|----------------|------------------|------------------|---------|------|----------|
| MIMAT0000754 | hsa-miR-337-3p | NM_001010844     | IRAK1BP1         | circRNA | chr6 | 79608151 |
| MIMAT0000754 | hsa-miR-337-3p | NM_031469        | SH3BGRL2         | circRNA | chr6 | 80409990 |
| MIMAT0000754 | hsa-miR-337-3p | NM_031469        | SH3BGRL2         | circRNA | chr6 | 80411146 |
| MIMAT0000754 | hsa-miR-337-3p | NM_015525        | IBTK             | circRNA | chr6 | 82912273 |
| MIMAT0000754 | hsa-miR-337-3p | NM_015021        | ZNF292           | circRNA | chr6 | 87920953 |
| MIMAT0000754 | hsa-miR-337-3p | NM_016021        | UBE2J1           | circRNA | chr6 | 90036727 |
| MIMAT0000754 | hsa-miR-337-3p | NM_198468        | MMS22L           | circRNA | chr6 | 97720606 |
| MIMAT0000754 | hsa-miR-337-3p | NM_001004317     | LIN28B           | circRNA | chr6 | 1.06E+08 |
| MIMAT0000754 | hsa-miR-337-3p | NM_006016        | CD164            | circRNA | chr6 | 1.1E+08  |
| MIMAT0000754 | hsa-miR-337-3p | NM_002912        | REV3L            | circRNA | chr6 | 1.12E+08 |
| MIMAT0000754 | hsa-miR-337-3p | NM_002912        | REV3L            | circRNA | chr6 | 1.12E+08 |
| MIMAT0000754 | hsa-miR-337-3p | NM_002912        | REV3L            | circRNA | chr6 | 1.12E+08 |
| MIMAT0000754 | hsa-miR-337-3p | NM_020399        | GOPC             | circRNA | chr6 | 1.18E+08 |
| MIMAT0000754 | hsa-miR-337-3p | NM_020755        | SERINC1          | circRNA | chr6 | 1.23E+08 |
| MIMAT0000754 | hsa-miR-337-3p | NM_001135648     | PTPRK            | circRNA | chr6 | 1.28E+08 |
| MIMAT0000754 | hsa-miR-337-3p | NM_004830        | MED23            | circRNA | chr6 | 1.32E+08 |
| MIMAT0000754 | hsa-miR-337-3p | NM_006620        | HBS1L            | circRNA | chr6 | 1.35E+08 |
| MIMAT0000754 | hsa-miR-337-3p | hsa_circ_0078031 | hsa_circ_0078031 | circRNA | chr6 | 1.42E+08 |
| MIMAT0000754 | hsa-miR-337-3p | NM_005389        | PCMT1            | circRNA | chr6 | 1.5E+08  |
| MIMAT0000754 | hsa-miR-337-3p | NM_020861        | ZBTB2            | circRNA | chr6 | 1.52E+08 |
| MIMAT0000754 | hsa-miR-337-3p | NM_012454        | TIAM2            | circRNA | chr6 | 1.55E+08 |
| MIMAT0000754 | hsa-miR-337-3p | NM_020245        | TULP4            | circRNA | chr6 | 1.59E+08 |
| MIMAT0000754 | hsa-miR-337-3p | NM_020823        | TMEM181          | circRNA | chr6 | 1.59E+08 |
| MIMAT0000754 | hsa-miR-337-3p | NM_014161        | MRPL18           | circRNA | chr6 | 1.6E+08  |
| MIMAT0000754 | hsa-miR-337-3p | NM_182552        | WDR27            | circRNA | chr6 | 1.7E+08  |
| MIMAT0000754 | hsa-miR-337-3p | TCONS_12_000256  | TCONS_12_000256  | circRNA | chr7 | 5105439  |
| MIMAT0000754 | hsa-miR-337-3p | TCONS_12_000256  | TCONS_12_000256  | circRNA | chr7 | 5238973  |
| MIMAT0000754 | hsa-miR-337-3p | NM_004227        | CYTH3            | circRNA | chr7 | 6204048  |
| MIMAT0000754 | hsa-miR-337-3p | NM_016265        | ZNF12            | circRNA | chr7 | 6728704  |
| MIMAT0000754 | hsa-miR-337-3p | NM_015132        | SNX13            | circRNA | chr7 | 17922232 |
| MIMAT0000754 | hsa-miR-337-3p | NM_182762        | MACC1            | circRNA | chr7 | 20179389 |
| MIMAT0000754 | hsa-miR-337-3p | NM_182762        | MACC1            | circRNA | chr7 | 20179405 |
| MIMAT0000754 | hsa-miR-337-3p | NM_015060        | AVL9             | circRNA | chr7 | 32794003 |
| MIMAT0000754 | hsa-miR-337-3p | NM_015060        | AVL9             | circRNA | chr7 | 32874474 |
| MIMAT0000754 | hsa-miR-337-3p | hsa_circ_0007400 | hsa_circ_0007400 | circRNA | chr7 | 32874474 |
| MIMAT0000754 | hsa-miR-337-3p | NM_004760        | STK17A           | circRNA | chr7 | 43670240 |
| MIMAT0000754 | hsa-miR-337-3p | NM_015332        | NUDCD3           | circRNA | chr7 | 44446731 |
| MIMAT0000754 | hsa-miR-337-3p | NM_022748        | TNS3             | circRNA | chr7 | 47578465 |
| MIMAT0000754 | hsa-miR-337-3p | NM_001042762     | FIGNL1           | circRNA | chr7 | 50511957 |
| MIMAT0000754 | hsa-miR-337-3p | NM_178558        | ZNF680           | circRNA | chr7 | 63980584 |
| MIMAT0000754 | hsa-miR-337-3p | NM_016220        | ZNF107           | circRNA | chr7 | 64146284 |
| MIMAT0000754 | hsa-miR-337-3p | NM_016220        | ZNF107           | circRNA | chr7 | 64151692 |
| MIMAT0000754 | hsa-miR-337-3p | NM_152626        | ZNF92            | circRNA | chr7 | 64820428 |
| MIMAT0000754 | hsa-miR-337-3p | NR_027393        | INTS4L1          | circRNA | chr7 | 64820428 |
| MIMAT0000754 | hsa-miR-337-3p | NR_033416        | CCT6P3           | circRNA | chr7 | 64820428 |
| MIMAT0000754 | hsa-miR-337-3p | TCONS_12_000273  | TCONS_12_000273  | circRNA | chr7 | 66038150 |
| MIMAT0000754 | hsa-miR-337-3p | NM_153033        | KCTD7            | circRNA | chr7 | 66222538 |
| MIMAT0000754 | hsa-miR-337-3p | NM_003388        | CLIP2            | circRNA | chr7 | 72687131 |
| MIMAT0000754 | hsa-miR-337-3p | NM_032999        | GTF2I            | circRNA | chr7 | 72687131 |
| MIMAT0000754 | hsa-miR-337-3p | NR_040582        | STAG3L3          | circRNA | chr7 | 72935100 |
| MIMAT0000754 | hsa-miR-337-3p | NM_003388        | CLIP2            | circRNA | chr7 | 73217299 |
| MIMAT0000754 | hsa-miR-337-3p | NM_032999        | GTF2I            | circRNA | chr7 | 73217299 |
| MIMAT0000754 | hsa-miR-337-3p | NM_003388        | CLIP2            | circRNA | chr7 | 73217388 |
| MIMAT0000754 | hsa-miR-337-3p | NM_032999        | GTF2I            | circRNA | chr7 | 73217388 |
| MIMAT0000754 | hsa-miR-337-3p | NM_001099415     | POM121C          | circRNA | chr7 | 75651104 |
| MIMAT0000754 | hsa-miR-337-3p | NM_005338        | HIP1             | circRNA | chr7 | 75651104 |
| MIMAT0000754 | hsa-miR-337-3p | NM_198467        | RSBN1L           | circRNA | chr7 | 77402546 |
| MIMAT0000754 | hsa-miR-337-3p | NM_021723        | ADAM22           | circRNA | chr7 | 87826276 |
| MIMAT0000754 | hsa-miR-337-3p | NM_012395        | CDK14            | circRNA | chr7 | 90837069 |
| MIMAT0000754 | hsa-miR-337-3p | NM_017667        | CCDC132          | circRNA | chr7 | 92921078 |
| MIMAT0000754 | hsa-miR-337-3p | NM_000089        | COL1A2           | circRNA | chr7 | 94057713 |
| MIMAT0000754 | hsa-miR-337-3p | NM_014916        | LMTK2            | circRNA | chr7 | 97835521 |
| MIMAT0000754 | hsa-miR-337-3p | NM_003439        | ZKSCAN1          | circRNA | chr7 | 99631114 |
| MIMAT0000754 | hsa-miR-337-3p | NM_003302        | TRIP6            | circRNA | chr7 | 1E+08    |
| MIMAT0000754 | hsa-miR-337-3p | NM_000602        | SERPINE1         | circRNA | chr7 | 1.01E+08 |

|              |                |                  |                  |         |       |          |
|--------------|----------------|------------------|------------------|---------|-------|----------|
| MIMAT0000754 | hsa-miR-337-3p | NR_024199        | CBLL1            | circRNA | chr7  | 1.07E+08 |
| MIMAT0000754 | hsa-miR-337-3p | NM_001127500     | MET              | circRNA | chr7  | 1.16E+08 |
| MIMAT0000754 | hsa-miR-337-3p | NM_003941        | WASL             | circRNA | chr7  | 1.23E+08 |
| MIMAT0000754 | hsa-miR-337-3p | NM_176814        | ZNF800           | circRNA | chr7  | 1.27E+08 |
| MIMAT0000754 | hsa-miR-337-3p | NM_001199672     | CALU             | circRNA | chr7  | 1.28E+08 |
| MIMAT0000754 | hsa-miR-337-3p | hsa_circ_0001748 | hsa_circ_002039  | circRNA | chr7  | 1.33E+08 |
| MIMAT0000754 | hsa-miR-337-3p | NM_016019        | LUC7L2           | circRNA | chr7  | 1.39E+08 |
| MIMAT0000754 | hsa-miR-337-3p | TCONS_12_000269  | TCONS_12_000269  | circRNA | chr7  | 1.5E+08  |
| MIMAT0000754 | hsa-miR-337-3p | NM_020728        | ESYT2            | circRNA | chr7  | 1.59E+08 |
| MIMAT0000754 | hsa-miR-337-3p | NM_182643        | DLC1             | circRNA | chr8  | 12942317 |
| MIMAT0000754 | hsa-miR-337-3p | NM_016353        | ZDHHC2           | circRNA | chr8  | 17079776 |
| MIMAT0000754 | hsa-miR-337-3p | NM_016353        | ZDHHC2           | circRNA | chr8  | 17080023 |
| MIMAT0000754 | hsa-miR-337-3p | NM_001722        | POLR3D           | circRNA | chr8  | 22108425 |
| MIMAT0000754 | hsa-miR-337-3p | NM_004331        | BNIP3L           | circRNA | chr8  | 26268545 |
| MIMAT0000754 | hsa-miR-337-3p | NM_032664        | FUT10            | circRNA | chr8  | 33246884 |
| MIMAT0000754 | hsa-miR-337-3p | NM_004874        | BAG4             | circRNA | chr8  | 38069640 |
| MIMAT0000754 | hsa-miR-337-3p | NM_001134296     | AP3M2            | circRNA | chr8  | 42026844 |
| MIMAT0000754 | hsa-miR-337-3p | NM_024831        | TGS1             | circRNA | chr8  | 56737949 |
| MIMAT0000754 | hsa-miR-337-3p | NM_024790        | CSPP1            | circRNA | chr8  | 68002369 |
| MIMAT0000754 | hsa-miR-337-3p | NM_006421        | ARFGEF1          | circRNA | chr8  | 68150683 |
| MIMAT0000754 | hsa-miR-337-3p | NM_024721        | ZFHX4            | circRNA | chr8  | 77776945 |
| MIMAT0000754 | hsa-miR-337-3p | NM_001205263     | RAD54B           | circRNA | chr8  | 95403887 |
| MIMAT0000754 | hsa-miR-337-3p | NM_017890        | VPS13B           | circRNA | chr8  | 1E+08    |
| MIMAT0000754 | hsa-miR-337-3p | NR_027427        | TATDN1           | circRNA | chr8  | 1.26E+08 |
| MIMAT0000754 | hsa-miR-337-3p | TCONS_00015354   | TCONS_00015354   | circRNA | chr8  | 1.29E+08 |
| MIMAT0000754 | hsa-miR-337-3p | NM_001247996     | ASAP1            | circRNA | chr8  | 1.31E+08 |
| MIMAT0000754 | hsa-miR-337-3p | NM_001247996     | ASAP1            | circRNA | chr8  | 1.31E+08 |
| MIMAT0000754 | hsa-miR-337-3p | NM_001247996     | ASAP1            | circRNA | chr8  | 1.31E+08 |
| MIMAT0000754 | hsa-miR-337-3p | NM_001247996     | ASAP1            | circRNA | chr8  | 1.31E+08 |
| MIMAT0000754 | hsa-miR-337-3p | NM_001247996     | ASAP1            | circRNA | chr8  | 1.31E+08 |
| MIMAT0000754 | hsa-miR-337-3p | NM_001247996     | ASAP1            | circRNA | chr8  | 1.31E+08 |
| MIMAT0000754 | hsa-miR-337-3p | NM_012154        | EIF2C2           | circRNA | chr8  | 1.42E+08 |
| MIMAT0000754 | hsa-miR-337-3p | NM_001199649     | PTK2             | circRNA | chr8  | 1.42E+08 |
| MIMAT0000754 | hsa-miR-337-3p | NM_001199649     | PTK2             | circRNA | chr8  | 1.42E+08 |
| MIMAT0000754 | hsa-miR-337-3p | NM_153186        | KANK1            | circRNA | chr9  | 548582   |
| MIMAT0000754 | hsa-miR-337-3p | TCONS_12_000291  | TCONS_12_000291  | circRNA | chr9  | 2495206  |
| MIMAT0000754 | hsa-miR-337-3p | NM_001042413     | GLIS3            | circRNA | chr9  | 4266478  |
| MIMAT0000754 | hsa-miR-337-3p | NM_004170        | SLC1A1           | circRNA | chr9  | 4587218  |
| MIMAT0000754 | hsa-miR-337-3p | NM_016282        | AK3              | circRNA | chr9  | 4711432  |
| MIMAT0000754 | hsa-miR-337-3p | NM_004972        | JAK2             | circRNA | chr9  | 5127436  |
| MIMAT0000754 | hsa-miR-337-3p | NM_033222        | PSIP1            | circRNA | chr9  | 15464778 |
| MIMAT0000754 | hsa-miR-337-3p | NM_017645        | HAUS6            | circRNA | chr9  | 19087108 |
| MIMAT0000754 | hsa-miR-337-3p | NM_001539        | DNAJA1           | circRNA | chr9  | 33026547 |
| MIMAT0000754 | hsa-miR-337-3p | hsa_circ_0001859 | hsa_circ_001783  | circRNA | chr9  | 37089261 |
| MIMAT0000754 | hsa-miR-337-3p | NM_032226        | ZCCHC7           | circRNA | chr9  | 37130284 |
| MIMAT0000754 | hsa-miR-337-3p | NM_032226        | ZCCHC7           | circRNA | chr9  | 37176752 |
| MIMAT0000754 | hsa-miR-337-3p | NM_032226        | ZCCHC7           | circRNA | chr9  | 37192166 |
| MIMAT0000754 | hsa-miR-337-3p | NM_015110        | SMC5             | circRNA | chr9  | 72968363 |
| MIMAT0000754 | hsa-miR-337-3p | NM_001025780     | FAM108B1         | circRNA | chr9  | 74480417 |
| MIMAT0000754 | hsa-miR-337-3p | NM_033305        | VPS13A           | circRNA | chr9  | 79835236 |
| MIMAT0000754 | hsa-miR-337-3p | NM_152573        | RASEF            | circRNA | chr9  | 85672211 |
| MIMAT0000754 | hsa-miR-337-3p | hsa_circ_0008720 | hsa_circ_0008720 | circRNA | chr9  | 98747807 |
| MIMAT0000754 | hsa-miR-337-3p | NM_015469        | NIPSNAP3A        | circRNA | chr9  | 1.08E+08 |
| MIMAT0000754 | hsa-miR-337-3p | hsa_circ_0001878 | hsa_circ_001203  | circRNA | chr9  | 1.08E+08 |
| MIMAT0000754 | hsa-miR-337-3p | hsa_circ_0001879 | hsa_circ_001867  | circRNA | chr9  | 1.08E+08 |
| MIMAT0000754 | hsa-miR-337-3p | NM_080546        | SLC44A1          | circRNA | chr9  | 1.08E+08 |
| MIMAT0000754 | hsa-miR-337-3p | NM_032012        | C9orf5           | circRNA | chr9  | 1.12E+08 |
| MIMAT0000754 | hsa-miR-337-3p | NM_001735        | C5               | circRNA | chr9  | 1.24E+08 |
| MIMAT0000754 | hsa-miR-337-3p | NM_018201        | TBC1D13          | circRNA | chr9  | 1.32E+08 |
| MIMAT0000754 | hsa-miR-337-3p | NM_014506        | TOR1B            | circRNA | chr9  | 1.33E+08 |
| MIMAT0000754 | hsa-miR-337-3p | NM_013318        | PRRC2B           | circRNA | chr9  | 1.34E+08 |
| MIMAT0000754 | hsa-miR-337-3p | NM_033161        | SURF4            | circRNA | chr9  | 1.36E+08 |
| MIMAT0000754 | hsa-miR-337-3p | NM_020385        | REXO4            | circRNA | chr9  | 1.36E+08 |
| MIMAT0000754 | hsa-miR-337-3p | NM_001494        | GDI2             | circRNA | chr10 | 5842666  |
| MIMAT0000754 | hsa-miR-337-3p | NM_004808        | NMT2             | circRNA | chr10 | 15151760 |

|              |                |                  |                  |         |       |          |
|--------------|----------------|------------------|------------------|---------|-------|----------|
| MIMAT0000754 | hsa-miR-337-3p | hsa_circ_0017904 | hsa_circ_0017904 | circRNA | chr10 | 17882673 |
| MIMAT0000754 | hsa-miR-337-3p | NM_005028        | PIP4K2A          | circRNA | chr10 | 22825255 |
| MIMAT0000754 | hsa-miR-337-3p | NM_005028        | PIP4K2A          | circRNA | chr10 | 22862253 |
| MIMAT0000754 | hsa-miR-337-3p | NM_014915        | ANKRD26          | circRNA | chr10 | 27352932 |
| MIMAT0000754 | hsa-miR-337-3p | NM_001128128     | ZEB1             | circRNA | chr10 | 31661701 |
| MIMAT0000754 | hsa-miR-337-3p | hsa_circ_0000227 | hsa_circ_001214  | circRNA | chr10 | 31661701 |
| MIMAT0000754 | hsa-miR-337-3p | NM_004521        | KIF5B            | circRNA | chr10 | 32299535 |
| MIMAT0000754 | hsa-miR-337-3p | NM_004521        | KIF5B            | circRNA | chr10 | 32300131 |
| MIMAT0000754 | hsa-miR-337-3p | NM_004521        | KIF5B            | circRNA | chr10 | 32322844 |
| MIMAT0000754 | hsa-miR-337-3p | NM_025209        | EPC1             | circRNA | chr10 | 32573715 |
| MIMAT0000754 | hsa-miR-337-3p | NM_145012        | CCNY             | circRNA | chr10 | 35860375 |
| MIMAT0000754 | hsa-miR-337-3p | NM_145011        | ZNF25            | circRNA | chr10 | 38240304 |
| MIMAT0000754 | hsa-miR-337-3p | NM_006955        | ZNF33B           | circRNA | chr10 | 43087885 |
| MIMAT0000754 | hsa-miR-337-3p | NM_007021        | C10orf10         | circRNA | chr10 | 45472498 |
| MIMAT0000754 | hsa-miR-337-3p | TCONS_12_000030  | TCONS_12_000030  | circRNA | chr10 | 48514675 |
| MIMAT0000754 | hsa-miR-337-3p | TCONS_12_000039  | TCONS_12_000039  | circRNA | chr10 | 48514675 |
| MIMAT0000754 | hsa-miR-337-3p | NM_147156        | SGMS1            | circRNA | chr10 | 52103537 |
| MIMAT0000754 | hsa-miR-337-3p | NM_147156        | SGMS1            | circRNA | chr10 | 52193268 |
| MIMAT0000754 | hsa-miR-337-3p | NM_032776        | JMJD1C           | circRNA | chr10 | 64943297 |
| MIMAT0000754 | hsa-miR-337-3p | NM_032776        | JMJD1C           | circRNA | chr10 | 65164938 |
| MIMAT0000754 | hsa-miR-337-3p | NM_004728        | DDX21            | circRNA | chr10 | 70743666 |
| MIMAT0000754 | hsa-miR-337-3p | NM_001142648     | SAR1A            | circRNA | chr10 | 71910093 |
| MIMAT0000754 | hsa-miR-337-3p | NM_001142595     | P4HA1            | circRNA | chr10 | 74834614 |
| MIMAT0000754 | hsa-miR-337-3p | NM_001142596     | P4HA1            | circRNA | chr10 | 74834614 |
| MIMAT0000754 | hsa-miR-337-3p | NM_001123        | ADK              | circRNA | chr10 | 75993327 |
| MIMAT0000754 | hsa-miR-337-3p | hsa_circ_0000249 | hsa_circ_001838  | circRNA | chr10 | 76214325 |
| MIMAT0000754 | hsa-miR-337-3p | hsa_circ_0000249 | hsa_circ_001838  | circRNA | chr10 | 76273892 |
| MIMAT0000754 | hsa-miR-337-3p | NM_032373        | PCGF5            | circRNA | chr10 | 93040192 |
| MIMAT0000754 | hsa-miR-337-3p | NM_032373        | PCGF5            | circRNA | chr10 | 93040626 |
| MIMAT0000754 | hsa-miR-337-3p | NM_003972        | BTAF1            | circRNA | chr10 | 93771127 |
| MIMAT0000754 | hsa-miR-337-3p | NM_014912        | CPEB3            | circRNA | chr10 | 93809755 |
| MIMAT0000754 | hsa-miR-337-3p | NM_014803        | ZNF518A          | circRNA | chr10 | 97919599 |
| MIMAT0000754 | hsa-miR-337-3p | NM_002629        | PGAM1            | circRNA | chr10 | 99192943 |
| MIMAT0000754 | hsa-miR-337-3p | NM_017902        | HIF1AN           | circRNA | chr10 | 1.02E+08 |
| MIMAT0000754 | hsa-miR-337-3p | NM_007373        | SHOC2            | circRNA | chr10 | 1.13E+08 |
| MIMAT0000754 | hsa-miR-337-3p | NM_001244949     | GPAM             | circRNA | chr10 | 1.14E+08 |
| MIMAT0000754 | hsa-miR-337-3p | NM_145206        | VTI1A            | circRNA | chr10 | 1.15E+08 |
| MIMAT0000754 | hsa-miR-337-3p | NM_153810        | C10orf46         | circRNA | chr10 | 1.2E+08  |
| MIMAT0000754 | hsa-miR-337-3p | NM_001033925     | TIAL1            | circRNA | chr10 | 1.21E+08 |
| MIMAT0000754 | hsa-miR-337-3p | NM_001033925     | TIAL1            | circRNA | chr10 | 1.21E+08 |
| MIMAT0000754 | hsa-miR-337-3p | NM_032182        | FAM175B          | circRNA | chr10 | 1.27E+08 |
| MIMAT0000754 | hsa-miR-337-3p | NM_021961        | TEAD1            | circRNA | chr11 | 12963554 |
| MIMAT0000754 | hsa-miR-337-3p | NM_021961        | TEAD1            | circRNA | chr11 | 12965974 |
| MIMAT0000754 | hsa-miR-337-3p | NM_001033506     | CSTF3            | circRNA | chr11 | 33163414 |
| MIMAT0000754 | hsa-miR-337-3p | NR_024625        | API5             | circRNA | chr11 | 43364575 |
| MIMAT0000754 | hsa-miR-337-3p | NM_016142        | HSD17B12         | circRNA | chr11 | 43861574 |
| MIMAT0000754 | hsa-miR-337-3p | NM_014342        | MTCH2            | circRNA | chr11 | 47639306 |
| MIMAT0000754 | hsa-miR-337-3p | NM_015231        | NUP160           | circRNA | chr11 | 47861931 |
| MIMAT0000754 | hsa-miR-337-3p | NR_026593        | TMX2             | circRNA | chr11 | 57505326 |
| MIMAT0000754 | hsa-miR-337-3p | NM_024811        | CPSF7            | circRNA | chr11 | 61188000 |
| MIMAT0000754 | hsa-miR-337-3p | NM_006185        | NUMA1            | circRNA | chr11 | 71773197 |
| MIMAT0000754 | hsa-miR-337-3p | NM_173582        | PGM2L1           | circRNA | chr11 | 74043813 |
| MIMAT0000754 | hsa-miR-337-3p | NM_018367        | ACER3            | circRNA | chr11 | 76621983 |
| MIMAT0000754 | hsa-miR-337-3p | NM_007166        | PICALM           | circRNA | chr11 | 85669912 |
| MIMAT0000754 | hsa-miR-337-3p | NM_144664        | FAM76B           | circRNA | chr11 | 95504013 |
| MIMAT0000754 | hsa-miR-337-3p | NM_144664        | FAM76B           | circRNA | chr11 | 95504126 |
| MIMAT0000754 | hsa-miR-337-3p | hsa_circ_0000353 | hsa_circ_001720  | circRNA | chr11 | 1.02E+08 |
| MIMAT0000754 | hsa-miR-337-3p | NM_001077691     | ALG9             | circRNA | chr11 | 1.12E+08 |
| MIMAT0000754 | hsa-miR-337-3p | NM_024740        | ALG9             | circRNA | chr11 | 1.12E+08 |
| MIMAT0000754 | hsa-miR-337-3p | NM_001197104     | MLL              | circRNA | chr11 | 1.18E+08 |
| MIMAT0000754 | hsa-miR-337-3p | NM_003105        | SORL1            | circRNA | chr11 | 1.22E+08 |
| MIMAT0000754 | hsa-miR-337-3p | NM_032873        | UBASH3B          | circRNA | chr11 | 1.23E+08 |
| MIMAT0000754 | hsa-miR-337-3p | NM_004879        | EI24             | circRNA | chr11 | 1.25E+08 |
| MIMAT0000754 | hsa-miR-337-3p | NM_001243597     | CDON             | circRNA | chr11 | 1.26E+08 |
| MIMAT0000754 | hsa-miR-337-3p | NM_001039661     | TIRAP            | circRNA | chr11 | 1.26E+08 |

|              |                |                  |                  |         |       |          |
|--------------|----------------|------------------|------------------|---------|-------|----------|
| MIMAT0000754 | hsa-miR-337-3p | NM_006931        | SLC2A3           | circRNA | chr12 | 8073680  |
| MIMAT0000754 | hsa-miR-337-3p | NM_020734        | RIMKLB           | circRNA | chr12 | 8927785  |
| MIMAT0000754 | hsa-miR-337-3p | NM_030640        | DUSP16           | circRNA | chr12 | 12628688 |
| MIMAT0000754 | hsa-miR-337-3p | NM_177444        | PPFIBP1          | circRNA | chr12 | 27461356 |
| MIMAT0000754 | hsa-miR-337-3p | NM_177444        | PPFIBP1          | circRNA | chr12 | 27475531 |
| MIMAT0000754 | hsa-miR-337-3p | NM_018318        | CCDC91           | circRNA | chr12 | 28393821 |
| MIMAT0000754 | hsa-miR-337-3p | hsa_circ_0000386 | hsa_circ_002027  | circRNA | chr12 | 28393821 |
| MIMAT0000754 | hsa-miR-337-3p | NM_018318        | CCDC91           | circRNA | chr12 | 28702847 |
| MIMAT0000754 | hsa-miR-337-3p | NM_153634        | CPNE8            | circRNA | chr12 | 39047326 |
| MIMAT0000754 | hsa-miR-337-3p | NM_030674        | SLC38A1          | circRNA | chr12 | 46590894 |
| MIMAT0000754 | hsa-miR-337-3p | NM_001126103     | RACGAP1          | circRNA | chr12 | 50388096 |
| MIMAT0000754 | hsa-miR-337-3p | NM_138473        | SP1              | circRNA | chr12 | 53806478 |
| MIMAT0000754 | hsa-miR-337-3p | NM_138473        | SP1              | circRNA | chr12 | 53808374 |
| MIMAT0000754 | hsa-miR-337-3p | NM_018457        | PRR13            | circRNA | chr12 | 53847641 |
| MIMAT0000754 | hsa-miR-337-3p | NM_001127322     | CBX5             | circRNA | chr12 | 54632245 |
| MIMAT0000754 | hsa-miR-337-3p | NM_001127322     | CBX5             | circRNA | chr12 | 54632874 |
| MIMAT0000754 | hsa-miR-337-3p | NM_001029        | RPS26            | circRNA | chr12 | 56435882 |
| MIMAT0000754 | hsa-miR-337-3p | hsa_circ_0027246 | hsa_circ_0027246 | circRNA | chr12 | 57800287 |
| MIMAT0000754 | hsa-miR-337-3p | hsa_circ_0027246 | hsa_circ_0027246 | circRNA | chr12 | 57810167 |
| MIMAT0000754 | hsa-miR-337-3p | hsa_circ_0027246 | hsa_circ_0027246 | circRNA | chr12 | 57814776 |
| MIMAT0000754 | hsa-miR-337-3p | NM_031435        | THAP2            | circRNA | chr12 | 72074247 |
| MIMAT0000754 | hsa-miR-337-3p | NM_020841        | OSBPL8           | circRNA | chr12 | 76746129 |
| MIMAT0000754 | hsa-miR-337-3p | NM_014903        | NAV3             | circRNA | chr12 | 78582443 |
| MIMAT0000754 | hsa-miR-337-3p | NM_001135805     | SYT1             | circRNA | chr12 | 79843292 |
| MIMAT0000754 | hsa-miR-337-3p | NM_003297        | NR2C1            | circRNA | chr12 | 95415490 |
| MIMAT0000754 | hsa-miR-337-3p | NM_013320        | HCFC2            | circRNA | chr12 | 1.04E+08 |
| MIMAT0000754 | hsa-miR-337-3p | NM_013320        | HCFC2            | circRNA | chr12 | 1.04E+08 |
| MIMAT0000754 | hsa-miR-337-3p | NM_032148        | SLC41A2          | circRNA | chr12 | 1.05E+08 |
| MIMAT0000754 | hsa-miR-337-3p | NM_015335        | MED13L           | circRNA | chr12 | 1.16E+08 |
| MIMAT0000754 | hsa-miR-337-3p | NM_015335        | MED13L           | circRNA | chr12 | 1.17E+08 |
| MIMAT0000754 | hsa-miR-337-3p | NM_014730        | MLEC             | circRNA | chr12 | 1.21E+08 |
| MIMAT0000754 | hsa-miR-337-3p | NM_014730        | MLEC             | circRNA | chr12 | 1.21E+08 |
| MIMAT0000754 | hsa-miR-337-3p | NM_001170543     | PGAM5            | circRNA | chr12 | 1.33E+08 |
| MIMAT0000754 | hsa-miR-337-3p | NM_015114        | ANKLE2           | circRNA | chr12 | 1.33E+08 |
| MIMAT0000754 | hsa-miR-337-3p | TCONS_12_000070  | TCONS_12_000070  | circRNA | chr13 | 19870554 |
| MIMAT0000754 | hsa-miR-337-3p | TCONS_12_000070  | TCONS_12_000070  | circRNA | chr13 | 20138594 |
| MIMAT0000754 | hsa-miR-337-3p | TCONS_12_000070  | TCONS_12_000070  | circRNA | chr13 | 20264023 |
| MIMAT0000754 | hsa-miR-337-3p | NM_014572        | LATS2            | circRNA | chr13 | 21620315 |
| MIMAT0000754 | hsa-miR-337-3p | NM_153251        | ZDHHC20          | circRNA | chr13 | 22025232 |
| MIMAT0000754 | hsa-miR-337-3p | NM_014089        | NUPL1            | circRNA | chr13 | 25916446 |
| MIMAT0000754 | hsa-miR-337-3p | NM_175854        | PAN3             | circRNA | chr13 | 28743740 |
| MIMAT0000754 | hsa-miR-337-3p | NM_014887        | N4BP2L2          | circRNA | chr13 | 33083760 |
| MIMAT0000754 | hsa-miR-337-3p | NM_014887        | N4BP2L2          | circRNA | chr13 | 33110789 |
| MIMAT0000754 | hsa-miR-337-3p | NM_015087        | SPG20            | circRNA | chr13 | 36909357 |
| MIMAT0000754 | hsa-miR-337-3p | NM_005780        | LHFP             | circRNA | chr13 | 39917215 |
| MIMAT0000754 | hsa-miR-337-3p | NM_178009        | DGKH             | circRNA | chr13 | 42694693 |
| MIMAT0000754 | hsa-miR-337-3p | NM_015070        | ZC3H13           | circRNA | chr13 | 46543861 |
| MIMAT0000754 | hsa-miR-337-3p | NM_000321        | RB1              | circRNA | chr13 | 48951086 |
| MIMAT0000754 | hsa-miR-337-3p | NM_000321        | RB1              | circRNA | chr13 | 49055146 |
| MIMAT0000754 | hsa-miR-337-3p | NM_012141        | INTS6            | circRNA | chr13 | 51952481 |
| MIMAT0000754 | hsa-miR-337-3p | NM_019080        | NDFIP2           | circRNA | chr13 | 80127815 |
| MIMAT0000754 | hsa-miR-337-3p | NM_001130048     | DOCK9            | circRNA | chr13 | 99446716 |
| MIMAT0000754 | hsa-miR-337-3p | NM_007192        | SUPT16H          | circRNA | chr14 | 21826138 |
| MIMAT0000754 | hsa-miR-337-3p | hsa_circ_0000522 | hsa_circ_000586  | circRNA | chr14 | 21826138 |
| MIMAT0000754 | hsa-miR-337-3p | NM_032846        | RAB2B            | circRNA | chr14 | 21930543 |
| MIMAT0000754 | hsa-miR-337-3p | NM_014828        | TOX4             | circRNA | chr14 | 21956749 |
| MIMAT0000754 | hsa-miR-337-3p | NM_024328        | THTPA            | circRNA | chr14 | 24028295 |
| MIMAT0000754 | hsa-miR-337-3p | NM_001030055     | ARHGAP5          | circRNA | chr14 | 32561496 |
| MIMAT0000754 | hsa-miR-337-3p | NM_013448        | BAZ1A            | circRNA | chr14 | 35270356 |
| MIMAT0000754 | hsa-miR-337-3p | NM_017658        | KLHL28           | circRNA | chr14 | 45394939 |
| MIMAT0000754 | hsa-miR-337-3p | NM_004713        | NEMF             | circRNA | chr14 | 50064239 |
| MIMAT0000754 | hsa-miR-337-3p | NM_002408        | MGAT2            | circRNA | chr14 | 50090394 |
| MIMAT0000754 | hsa-miR-337-3p | NM_001130701     | STYX             | circRNA | chr14 | 53241579 |
| MIMAT0000754 | hsa-miR-337-3p | NM_145251        | STYX             | circRNA | chr14 | 53241579 |
| MIMAT0000754 | hsa-miR-337-3p | TCONS_12_000077  | TCONS_12_000077  | circRNA | chr14 | 53630284 |

|              |                |                  |                  |         |       |          |
|--------------|----------------|------------------|------------------|---------|-------|----------|
| MIMAT0000754 | hsa-miR-337-3p | NM_005776        | CNIH             | circRNA | chr14 | 54894180 |
| MIMAT0000754 | hsa-miR-337-3p | NM_015589        | SAMD4A           | circRNA | chr14 | 55117052 |
| MIMAT0000754 | hsa-miR-337-3p | NM_015589        | SAMD4A           | circRNA | chr14 | 55133151 |
| MIMAT0000754 | hsa-miR-337-3p | NM_182926        | KTN1             | circRNA | chr14 | 56078737 |
| MIMAT0000754 | hsa-miR-337-3p | NM_001244189     | KIAA0586         | circRNA | chr14 | 58956882 |
| MIMAT0000754 | hsa-miR-337-3p | NM_017420        | SIX4             | circRNA | chr14 | 61180775 |
| MIMAT0000754 | hsa-miR-337-3p | NM_003082        | SNAPC1           | circRNA | chr14 | 62235354 |
| MIMAT0000754 | hsa-miR-337-3p | NM_182914        | SYNE2            | circRNA | chr14 | 64516416 |
| MIMAT0000754 | hsa-miR-337-3p | NM_021979        | HSPA2            | circRNA | chr14 | 65009801 |
| MIMAT0000754 | hsa-miR-337-3p | NM_016026        | RDH11            | circRNA | chr14 | 68143769 |
| MIMAT0000754 | hsa-miR-337-3p | NM_018373        | SYNJ2BP          | circRNA | chr14 | 70839821 |
| MIMAT0000754 | hsa-miR-337-3p | NM_014982        | PCNX             | circRNA | chr14 | 71577946 |
| MIMAT0000754 | hsa-miR-337-3p | hsa_circ_0002722 | hsa_circ_0002722 | circRNA | chr14 | 71868873 |
| MIMAT0000754 | hsa-miR-337-3p | hsa_circ_0000552 | hsa_circ_000594  | circRNA | chr14 | 71911112 |
| MIMAT0000754 | hsa-miR-337-3p | hsa_circ_0006783 | hsa_circ_0006783 | circRNA | chr14 | 71911112 |
| MIMAT0000754 | hsa-miR-337-3p | NM_000153        | GALC             | circRNA | chr14 | 88411907 |
| MIMAT0000754 | hsa-miR-337-3p | NM_018319        | TDPI             | circRNA | chr14 | 90489002 |
| MIMAT0000754 | hsa-miR-337-3p | NM_001002860     | BTBD7            | circRNA | chr14 | 93705735 |
| MIMAT0000754 | hsa-miR-337-3p | NM_003384        | VRK1             | circRNA | chr14 | 97326976 |
| MIMAT0000754 | hsa-miR-337-3p | hsa_circ_0000566 | hsa_circ_002156  | circRNA | chr14 | 97326976 |
| MIMAT0000754 | hsa-miR-337-3p | NM_005552        | KLC1             | circRNA | chr14 | 1.04E+08 |
| MIMAT0000754 | hsa-miR-337-3p | NM_032374        | APOPT1           | circRNA | chr14 | 1.04E+08 |
| MIMAT0000754 | hsa-miR-337-3p | NM_003257        | TJP1             | circRNA | chr15 | 30100883 |
| MIMAT0000754 | hsa-miR-337-3p | NM_181077        | GOLGA8A          | circRNA | chr15 | 34677305 |
| MIMAT0000754 | hsa-miR-337-3p | NM_014106        | ZNF770           | circRNA | chr15 | 35270895 |
| MIMAT0000754 | hsa-miR-337-3p | NM_170589        | CASC5            | circRNA | chr15 | 40947121 |
| MIMAT0000754 | hsa-miR-337-3p | NM_018145        | FAM82A2          | circRNA | chr15 | 41028396 |
| MIMAT0000754 | hsa-miR-337-3p | NM_007236        | CHP              | circRNA | chr15 | 41573862 |
| MIMAT0000754 | hsa-miR-337-3p | NM_015289        | VPS39            | circRNA | chr15 | 42492108 |
| MIMAT0000754 | hsa-miR-337-3p | NM_001159280     | ADAL             | circRNA | chr15 | 43645986 |
| MIMAT0000754 | hsa-miR-337-3p | NM_138423        | CASC4            | circRNA | chr15 | 44620921 |
| MIMAT0000754 | hsa-miR-337-3p | hsa_circ_0000595 | hsa_circ_000851  | circRNA | chr15 | 44620921 |
| MIMAT0000754 | hsa-miR-337-3p | NM_017672        | TRPM7            | circRNA | chr15 | 50906415 |
| MIMAT0000754 | hsa-miR-337-3p | NM_002748        | MAPK6            | circRNA | chr15 | 52358056 |
| MIMAT0000754 | hsa-miR-337-3p | NM_017610        | RNF111           | circRNA | chr15 | 59350727 |
| MIMAT0000754 | hsa-miR-337-3p | NM_004998        | MYO1E            | circRNA | chr15 | 59428617 |
| MIMAT0000754 | hsa-miR-337-3p | NM_001018088     | VPS13C           | circRNA | chr15 | 62300896 |
| MIMAT0000754 | hsa-miR-337-3p | hsa_circ_0000607 | hsa_circ_001567  | circRNA | chr15 | 62300896 |
| MIMAT0000754 | hsa-miR-337-3p | NM_003922        | HERC1            | circRNA | chr15 | 63935736 |
| MIMAT0000754 | hsa-miR-337-3p | NM_022048        | CSNK1G1          | circRNA | chr15 | 64592717 |
| MIMAT0000754 | hsa-miR-337-3p | NM_024817        | THSD4            | circRNA | chr15 | 72074785 |
| MIMAT0000754 | hsa-miR-337-3p | NM_005724        | TSPAN3           | circRNA | chr15 | 77338561 |
| MIMAT0000754 | hsa-miR-337-3p | NM_024776        | PEAK1            | circRNA | chr15 | 77404519 |
| MIMAT0000754 | hsa-miR-337-3p | NM_016332        | SEPX1            | circRNA | chr16 | 1988323  |
| MIMAT0000754 | hsa-miR-337-3p | NM_000548        | TSC2             | circRNA | chr16 | 2110719  |
| MIMAT0000754 | hsa-miR-337-3p | NM_014287        | NOMO1            | circRNA | chr16 | 16176414 |
| MIMAT0000754 | hsa-miR-337-3p | NM_014287        | NOMO1            | circRNA | chr16 | 16234411 |
| MIMAT0000754 | hsa-miR-337-3p | NM_015092        | SMG1             | circRNA | chr16 | 18847255 |
| MIMAT0000754 | hsa-miR-337-3p | NM_003366        | UQCRC2           | circRNA | chr16 | 21976782 |
| MIMAT0000754 | hsa-miR-337-3p | hsa_circ_0038902 | hsa_circ_0038902 | circRNA | chr16 | 29467313 |
| MIMAT0000754 | hsa-miR-337-3p | NM_001031827     | BOLA2            | circRNA | chr16 | 29814971 |
| MIMAT0000754 | hsa-miR-337-3p | NR_002453        | LOC595101        | circRNA | chr16 | 29814971 |
| MIMAT0000754 | hsa-miR-337-3p | TCONS_12_000104  | TCONS_12_000104  | circRNA | chr16 | 29814971 |
| MIMAT0000754 | hsa-miR-337-3p | NM_003414        | ZNF267           | circRNA | chr16 | 31926048 |
| MIMAT0000754 | hsa-miR-337-3p | NM_015247        | CYLD             | circRNA | chr16 | 50783732 |
| MIMAT0000754 | hsa-miR-337-3p | NM_016284        | CNOT1            | circRNA | chr16 | 58590859 |
| MIMAT0000754 | hsa-miR-337-3p | NM_206999        | CNOT1            | circRNA | chr16 | 58590859 |
| MIMAT0000754 | hsa-miR-337-3p | NM_001018159     | NAE1             | circRNA | chr16 | 66839894 |
| MIMAT0000754 | hsa-miR-337-3p | NM_020786        | PDP2             | circRNA | chr16 | 66921056 |
| MIMAT0000754 | hsa-miR-337-3p | NM_001076785     | SLC7A6           | circRNA | chr16 | 68331372 |
| MIMAT0000754 | hsa-miR-337-3p | NM_001076785     | SLC7A6           | circRNA | chr16 | 68335551 |
| MIMAT0000754 | hsa-miR-337-3p | NM_015020        | PHLPP2           | circRNA | chr16 | 71679313 |
| MIMAT0000754 | hsa-miR-337-3p | NM_015020        | PHLPP2           | circRNA | chr16 | 71681786 |
| MIMAT0000754 | hsa-miR-337-3p | NR_027264        | GLG1             | circRNA | chr16 | 74481873 |
| MIMAT0000754 | hsa-miR-337-3p | NM_005153        | USP10            | circRNA | chr16 | 84753229 |

|              |                |                  |                  |         |       |          |
|--------------|----------------|------------------|------------------|---------|-------|----------|
| MIMAT0000754 | hsa-miR-337-3p | NM_022818        | MAP1LC3B         | circRNA | chr16 | 87438299 |
| MIMAT0000754 | hsa-miR-337-3p | NM_001080779     | MYO1C            | circRNA | chr17 | 1368696  |
| MIMAT0000754 | hsa-miR-337-3p | NM_002532        | NUP88            | circRNA | chr17 | 5319918  |
| MIMAT0000754 | hsa-miR-337-3p | hsa_circ_0000739 | hsa_circ_001080  | circRNA | chr17 | 5319918  |
| MIMAT0000754 | hsa-miR-337-3p | NM_020787        | ZNF624           | circRNA | chr17 | 16525167 |
| MIMAT0000754 | hsa-miR-337-3p | NM_014964        | EPN2             | circRNA | chr17 | 19238423 |
| MIMAT0000754 | hsa-miR-337-3p | NM_024857        | ATAD5            | circRNA | chr17 | 29041619 |
| MIMAT0000754 | hsa-miR-337-3p | NR_015341        | LRRC37BP1        | circRNA | chr17 | 29041619 |
| MIMAT0000754 | hsa-miR-337-3p | NM_024857        | ATAD5            | circRNA | chr17 | 29098493 |
| MIMAT0000754 | hsa-miR-337-3p | NR_015341        | LRRC37BP1        | circRNA | chr17 | 29098493 |
| MIMAT0000754 | hsa-miR-337-3p | NM_015355        | SUZ12            | circRNA | chr17 | 29109364 |
| MIMAT0000754 | hsa-miR-337-3p | NM_024857        | ATAD5            | circRNA | chr17 | 29109364 |
| MIMAT0000754 | hsa-miR-337-3p | NR_015341        | LRRC37BP1        | circRNA | chr17 | 29109364 |
| MIMAT0000754 | hsa-miR-337-3p | NM_015355        | SUZ12            | circRNA | chr17 | 29192769 |
| MIMAT0000754 | hsa-miR-337-3p | NM_024857        | ATAD5            | circRNA | chr17 | 29192769 |
| MIMAT0000754 | hsa-miR-337-3p | NR_015341        | LRRC37BP1        | circRNA | chr17 | 29192769 |
| MIMAT0000754 | hsa-miR-337-3p | hsa_circ_0000756 | hsa_circ_001390  | circRNA | chr17 | 29192769 |
| MIMAT0000754 | hsa-miR-337-3p | NM_015355        | SUZ12            | circRNA | chr17 | 29431769 |
| MIMAT0000754 | hsa-miR-337-3p | NM_015355        | SUZ12            | circRNA | chr17 | 29547060 |
| MIMAT0000754 | hsa-miR-337-3p | NM_015355        | SUZ12            | circRNA | chr17 | 29584909 |
| MIMAT0000754 | hsa-miR-337-3p | NM_015355        | SUZ12            | circRNA | chr17 | 29606765 |
| MIMAT0000754 | hsa-miR-337-3p | NM_015355        | SUZ12            | circRNA | chr17 | 29896033 |
| MIMAT0000754 | hsa-miR-337-3p | NM_001012241     | MSL1             | circRNA | chr17 | 38290856 |
| MIMAT0000754 | hsa-miR-337-3p | NM_001012241     | MSL1             | circRNA | chr17 | 38291729 |
| MIMAT0000754 | hsa-miR-337-3p | NM_139276        | STAT3            | circRNA | chr17 | 40465347 |
| MIMAT0000754 | hsa-miR-337-3p | NM_005533        | IFI35            | circRNA | chr17 | 41166371 |
| MIMAT0000754 | hsa-miR-337-3p | NM_007300        | BRCA1            | circRNA | chr17 | 41246095 |
| MIMAT0000754 | hsa-miR-337-3p | NM_031858        | NBR1             | circRNA | chr17 | 41363026 |
| MIMAT0000754 | hsa-miR-337-3p | NM_030753        | WNT3             | circRNA | chr17 | 44196441 |
| MIMAT0000754 | hsa-miR-337-3p | hsa_circ_0044187 | hsa_circ_0044187 | circRNA | chr17 | 44196441 |
| MIMAT0000754 | hsa-miR-337-3p | hsa_circ_0044189 | hsa_circ_0044189 | circRNA | chr17 | 44196441 |
| MIMAT0000754 | hsa-miR-337-3p | hsa_circ_0044190 | hsa_circ_0044190 | circRNA | chr17 | 44196441 |
| MIMAT0000754 | hsa-miR-337-3p | hsa_circ_0044191 | hsa_circ_0044191 | circRNA | chr17 | 44196441 |
| MIMAT0000754 | hsa-miR-337-3p | NM_030753        | WNT3             | circRNA | chr17 | 44242213 |
| MIMAT0000754 | hsa-miR-337-3p | hsa_circ_0044187 | hsa_circ_0044187 | circRNA | chr17 | 44242213 |
| MIMAT0000754 | hsa-miR-337-3p | hsa_circ_0044189 | hsa_circ_0044189 | circRNA | chr17 | 44242213 |
| MIMAT0000754 | hsa-miR-337-3p | hsa_circ_0044190 | hsa_circ_0044190 | circRNA | chr17 | 44242213 |
| MIMAT0000754 | hsa-miR-337-3p | hsa_circ_0044191 | hsa_circ_0044191 | circRNA | chr17 | 44242213 |
| MIMAT0000754 | hsa-miR-337-3p | NM_001145365     | ZNF652           | circRNA | chr17 | 47367911 |
| MIMAT0000754 | hsa-miR-337-3p | NM_001145365     | ZNF652           | circRNA | chr17 | 47374256 |
| MIMAT0000754 | hsa-miR-337-3p | NM_030802        | FAM117A          | circRNA | chr17 | 47788294 |
| MIMAT0000754 | hsa-miR-337-3p | NM_001130527     | SPAG9            | circRNA | chr17 | 49059925 |
| MIMAT0000754 | hsa-miR-337-3p | NM_001130528     | SPAG9            | circRNA | chr17 | 49059925 |
| MIMAT0000754 | hsa-miR-337-3p | NM_001251971     | SPAG9            | circRNA | chr17 | 49059925 |
| MIMAT0000754 | hsa-miR-337-3p | hsa_circ_0000785 | hsa_circ_001488  | circRNA | chr17 | 49059925 |
| MIMAT0000754 | hsa-miR-337-3p | NM_005121        | MED13            | circRNA | chr17 | 60062071 |
| MIMAT0000754 | hsa-miR-337-3p | NM_006852        | TLK2             | circRNA | chr17 | 60651314 |
| MIMAT0000754 | hsa-miR-337-3p | NM_025185        | TANC2            | circRNA | chr17 | 61500186 |
| MIMAT0000754 | hsa-miR-337-3p | NM_020198        | CCDC47           | circRNA | chr17 | 61845317 |
| MIMAT0000754 | hsa-miR-337-3p | NM_002737        | PRKCA            | circRNA | chr17 | 64510268 |
| MIMAT0000754 | hsa-miR-337-3p | NM_002737        | PRKCA            | circRNA | chr17 | 64605133 |
| MIMAT0000754 | hsa-miR-337-3p | NM_015462        | NOL11            | circRNA | chr17 | 65717495 |
| MIMAT0000754 | hsa-miR-337-3p | NM_004459        | BPTF             | circRNA | chr17 | 65907252 |
| MIMAT0000754 | hsa-miR-337-3p | NM_182641        | BPTF             | circRNA | chr17 | 65907252 |
| MIMAT0000754 | hsa-miR-337-3p | NM_182641        | BPTF             | circRNA | chr17 | 65959986 |
| MIMAT0000754 | hsa-miR-337-3p | NM_020761        | RPTOR            | circRNA | chr17 | 78705484 |
| MIMAT0000754 | hsa-miR-337-3p | NM_016538        | SIRT7            | circRNA | chr17 | 79873001 |
| MIMAT0000754 | hsa-miR-337-3p | NM_001012716     | C18orf56         | circRNA | chr18 | 649915   |
| MIMAT0000754 | hsa-miR-337-3p | NM_006868        | RAB31            | circRNA | chr18 | 9740256  |
| MIMAT0000754 | hsa-miR-337-3p | NM_006868        | RAB31            | circRNA | chr18 | 9765872  |
| MIMAT0000754 | hsa-miR-337-3p | NM_001243425     | TTC39C           | circRNA | chr18 | 21658146 |
| MIMAT0000754 | hsa-miR-337-3p | NM_018439        | IMPACT           | circRNA | chr18 | 22030808 |
| MIMAT0000754 | hsa-miR-337-3p | hsa_circ_0000840 | hsa_circ_000637  | circRNA | chr18 | 22030808 |
| MIMAT0000754 | hsa-miR-337-3p | NM_016097        | IER3IP1          | circRNA | chr18 | 44681447 |
| MIMAT0000754 | hsa-miR-337-3p | NM_021127        | PMAIP1           | circRNA | chr18 | 57570659 |

|              |                |                  |                 |         |       |          |
|--------------|----------------|------------------|-----------------|---------|-------|----------|
| MIMAT0000754 | hsa-miR-337-3p | NM_005483        | CHAF1A          | circRNA | chr19 | 4443140  |
| MIMAT0000754 | hsa-miR-337-3p | NM_001145160     | TPM4            | circRNA | chr19 | 16212566 |
| MIMAT0000754 | hsa-miR-337-3p | NM_003290        | TPM4            | circRNA | chr19 | 16212566 |
| MIMAT0000754 | hsa-miR-337-3p | NM_031218        | ZNF93           | circRNA | chr19 | 20026155 |
| MIMAT0000754 | hsa-miR-337-3p | NM_001159293     | ZNF737          | circRNA | chr19 | 20736553 |
| MIMAT0000754 | hsa-miR-337-3p | NM_001076675     | ZNF626          | circRNA | chr19 | 20829123 |
| MIMAT0000754 | hsa-miR-337-3p | NR_027130        | ZNF738          | circRNA | chr19 | 21558108 |
| MIMAT0000754 | hsa-miR-337-3p | NM_001076678     | ZNF493          | circRNA | chr19 | 21587998 |
| MIMAT0000754 | hsa-miR-337-3p | NM_145326        | ZNF493          | circRNA | chr19 | 21587998 |
| MIMAT0000754 | hsa-miR-337-3p | NM_173531        | ZNF100          | circRNA | chr19 | 21927781 |
| MIMAT0000754 | hsa-miR-337-3p | NM_003423        | ZNF43           | circRNA | chr19 | 22001935 |
| MIMAT0000754 | hsa-miR-337-3p | NM_001098626     | ZNF98           | circRNA | chr19 | 22586226 |
| MIMAT0000754 | hsa-miR-337-3p | NM_020855        | ZNF492          | circRNA | chr19 | 22836176 |
| MIMAT0000754 | hsa-miR-337-3p | TCONS_12_000133  | TCONS_12_000133 | circRNA | chr19 | 23332220 |
| MIMAT0000754 | hsa-miR-337-3p | NR_045208        | LOC100130342    | circRNA | chr19 | 35150383 |
| MIMAT0000754 | hsa-miR-337-3p | NM_001003962     | CAPNS1          | circRNA | chr19 | 36640762 |
| MIMAT0000754 | hsa-miR-337-3p | NM_001749        | CAPNS1          | circRNA | chr19 | 36640762 |
| MIMAT0000754 | hsa-miR-337-3p | hsa_circ_0000934 | hsa_circ_002015 | circRNA | chr19 | 40585626 |
| MIMAT0000754 | hsa-miR-337-3p | NM_001199324     | ZNF615          | circRNA | chr19 | 52495826 |
| MIMAT0000754 | hsa-miR-337-3p | NM_178523        | ZNF616          | circRNA | chr19 | 52627190 |
| MIMAT0000754 | hsa-miR-337-3p | NM_144684        | ZNF480          | circRNA | chr19 | 52825546 |
| MIMAT0000754 | hsa-miR-337-3p | NM_032423        | ZNF528          | circRNA | chr19 | 52909251 |
| MIMAT0000754 | hsa-miR-337-3p | NM_001105553     | ZNF83           | circRNA | chr19 | 53122203 |
| MIMAT0000754 | hsa-miR-337-3p | NM_001242531     | ZNF83           | circRNA | chr19 | 53122203 |
| MIMAT0000754 | hsa-miR-337-3p | NR_036599        | ZNF28           | circRNA | chr19 | 53311274 |
| MIMAT0000754 | hsa-miR-337-3p | NM_199132        | ZNF468          | circRNA | chr19 | 53352354 |
| MIMAT0000754 | hsa-miR-337-3p | NM_207333        | ZNF320          | circRNA | chr19 | 53391394 |
| MIMAT0000754 | hsa-miR-337-3p | NM_001008401     | ZNF761          | circRNA | chr19 | 53952856 |
| MIMAT0000754 | hsa-miR-337-3p | NM_001172773     | ZNF548          | circRNA | chr19 | 57911770 |
| MIMAT0000754 | hsa-miR-337-3p | NM_138347        | ZNF551          | circRNA | chr19 | 58212766 |
| MIMAT0000754 | hsa-miR-337-3p | NM_014480        | ZNF544          | circRNA | chr19 | 58771045 |
| MIMAT0000754 | hsa-miR-337-3p | NM_177559        | CSNK2A1         | circRNA | chr20 | 464094   |
| MIMAT0000754 | hsa-miR-337-3p | NM_181527        | NAA20           | circRNA | chr20 | 20013224 |
| MIMAT0000754 | hsa-miR-337-3p | NM_000099        | CST3            | circRNA | chr20 | 23614136 |
| MIMAT0000754 | hsa-miR-337-3p | NM_016436        | PHF20           | circRNA | chr20 | 34537017 |
| MIMAT0000754 | hsa-miR-337-3p | NM_002895        | RBL1            | circRNA | chr20 | 35649084 |
| MIMAT0000754 | hsa-miR-337-3p | NM_181802        | UBE2C           | circRNA | chr20 | 44445468 |
| MIMAT0000754 | hsa-miR-337-3p | NM_001316        | CSE1L           | circRNA | chr20 | 47707476 |
| MIMAT0000754 | hsa-miR-337-3p | hsa_circ_0001168 | hsa_circ_000906 | circRNA | chr20 | 47707476 |
| MIMAT0000754 | hsa-miR-337-3p | NM_018683        | RNF114          | circRNA | chr20 | 48569717 |
| MIMAT0000754 | hsa-miR-337-3p | NM_017843        | BCAS4           | circRNA | chr20 | 49493054 |
| MIMAT0000754 | hsa-miR-337-3p | NM_015339        | ADNP            | circRNA | chr20 | 49507235 |
| MIMAT0000754 | hsa-miR-337-3p | NM_020673        | RAB22A          | circRNA | chr20 | 56935245 |
| MIMAT0000754 | hsa-miR-337-3p | NM_003185        | TAF4            | circRNA | chr20 | 60549897 |
| MIMAT0000754 | hsa-miR-337-3p | NM_033081        | DIDO1           | circRNA | chr20 | 61541149 |
| MIMAT0000754 | hsa-miR-337-3p | NM_080796        | DIDO1           | circRNA | chr20 | 61541149 |
| MIMAT0000754 | hsa-miR-337-3p | NM_006948        | HSPA13          | circRNA | chr21 | 15744100 |
| MIMAT0000754 | hsa-miR-337-3p | NM_003489        | NRIP1           | circRNA | chr21 | 16365587 |
| MIMAT0000754 | hsa-miR-337-3p | TCONS_12_000171  | TCONS_12_000171 | circRNA | chr21 | 16365587 |
| MIMAT0000754 | hsa-miR-337-3p | NM_004540        | NCAM2           | circRNA | chr21 | 22652514 |
| MIMAT0000754 | hsa-miR-337-3p | NM_000484        | APP             | circRNA | chr21 | 27253407 |
| MIMAT0000754 | hsa-miR-337-3p | NM_206866        | BACH1           | circRNA | chr21 | 30718930 |
| MIMAT0000754 | hsa-miR-337-3p | NM_000628        | IL10RB          | circRNA | chr21 | 34648901 |
| MIMAT0000754 | hsa-miR-337-3p | NM_001136005     | GART            | circRNA | chr21 | 34897118 |
| MIMAT0000754 | hsa-miR-337-3p | NM_175085        | GART            | circRNA | chr21 | 34897118 |
| MIMAT0000754 | hsa-miR-337-3p | NM_138927        | SON             | circRNA | chr21 | 34924409 |
| MIMAT0000754 | hsa-miR-337-3p | NM_006933        | SLC5A3          | circRNA | chr21 | 35470995 |
| MIMAT0000754 | hsa-miR-337-3p | NM_032476        | MRPS6           | circRNA | chr21 | 35478811 |
| MIMAT0000754 | hsa-miR-337-3p | NM_032476        | MRPS6           | circRNA | chr21 | 35497725 |
| MIMAT0000754 | hsa-miR-337-3p | NM_033656        | BRWD1           | circRNA | chr21 | 40567166 |
| MIMAT0000754 | hsa-miR-337-3p | NM_015241        | MICAL3          | circRNA | chr22 | 18482571 |
| MIMAT0000754 | hsa-miR-337-3p | NM_014941        | MORC2           | circRNA | chr22 | 31363517 |
| MIMAT0000754 | hsa-miR-337-3p | NM_019843        | EIF4ENIF1       | circRNA | chr22 | 31835494 |
| MIMAT0000754 | hsa-miR-337-3p | NR_027780        | HMGXB4          | circRNA | chr22 | 35691457 |
| MIMAT0000754 | hsa-miR-337-3p | NM_022098        | XPNPEP3         | circRNA | chr22 | 41350640 |

|              |                |                  |                  |         |       |          |
|--------------|----------------|------------------|------------------|---------|-------|----------|
| MIMAT0000754 | hsa-miR-337-3p | NM_025204        | TRABD            | circRNA | chr22 | 50637221 |
| MIMAT0000754 | hsa-miR-337-3p | NM_001130923     | RABL2B           | circRNA | chr22 | 51208410 |
| MIMAT0000754 | hsa-miR-337-3p | hsa_circ_0089761 | hsa_circ_0089761 | circRNA | chrM  | 12851    |
| MIMAT0000754 | hsa-miR-337-3p | hsa_circ_0089763 | hsa_circ_0089763 | circRNA | chrM  | 12851    |
| MIMAT0000754 | hsa-miR-337-3p | NM_001039091     | PRPS2            | circRNA | chrX  | 12841776 |
| MIMAT0000754 | hsa-miR-337-3p | NM_004586        | RPS6KA3          | circRNA | chrX  | 20171447 |
| MIMAT0000754 | hsa-miR-337-3p | NM_004586        | RPS6KA3          | circRNA | chrX  | 20173186 |
| MIMAT0000754 | hsa-miR-337-3p | NM_000444        | PHEX             | circRNA | chrX  | 22237158 |
| MIMAT0000754 | hsa-miR-337-3p | NM_005765        | ATP6AP2          | circRNA | chrX  | 40464957 |
| MIMAT0000754 | hsa-miR-337-3p | NM_004229        | MED14            | circRNA | chrX  | 40534526 |
| MIMAT0000754 | hsa-miR-337-3p | NM_014735        | PHF16            | circRNA | chrX  | 46845132 |
| MIMAT0000754 | hsa-miR-337-3p | NM_018486        | HDAC8            | circRNA | chrX  | 71787827 |
| MIMAT0000754 | hsa-miR-337-3p | TCONS_00016926   | TCONS_00016926   | circRNA | chrX  | 73042378 |
| MIMAT0000754 | hsa-miR-337-3p | NM_003022        | SH3BGRL          | circRNA | chrX  | 80488944 |
| MIMAT0000754 | hsa-miR-337-3p | NM_001113490     | AMOT             | circRNA | chrX  | 1.12E+08 |
| MIMAT0000754 | hsa-miR-337-3p | TCONS_00017083   | TCONS_00017083   | circRNA | chrX  | 1.15E+08 |
| MIMAT0000754 | hsa-miR-337-3p | NM_001560        | IL13RA1          | circRNA | chrX  | 1.18E+08 |
| MIMAT0000754 | hsa-miR-337-3p | NM_013995        | LAMP2            | circRNA | chrX  | 1.2E+08  |
| MIMAT0000754 | hsa-miR-337-3p | NM_001167        | XIAP             | circRNA | chrX  | 1.23E+08 |
| MIMAT0000754 | hsa-miR-337-3p | NM_021183        | RAP2C            | circRNA | chrX  | 1.31E+08 |
| MIMAT0000754 | hsa-miR-337-3p | NM_173470        | MMGT1            | circRNA | chrX  | 1.35E+08 |
| MIMAT0000754 | hsa-miR-337-3p | NM_001164803     | RBMX             | circRNA | chrX  | 1.36E+08 |
| MIMAT0000754 | hsa-miR-337-3p | NM_000252        | MTM1             | circRNA | chrX  | 1.5E+08  |
| MIMAT0000754 | hsa-miR-337-3p | NM_024332        | BRCC3            | circRNA | chrX  | 1.54E+08 |
| MIMAT0000754 | hsa-miR-337-3p | NM_003372        | VBPI             | circRNA | chrX  | 1.54E+08 |

miR-337-3p was predicted to target Bcl2

| miRNAid      | miRNAname      | geneID          | geneName | geneType       | chromosome | narrowStart |
|--------------|----------------|-----------------|----------|----------------|------------|-------------|
| MIMAT0000062 | hsa-let-7a-5p  | ENSG00000171791 | BCL2     | protein_coding | chr18      | 60792463    |
| MIMAT0000063 | hsa-let-7b-5p  | ENSG00000171791 | BCL2     | protein_coding | chr18      | 60792463    |
| MIMAT0000064 | hsa-let-7c-5p  | ENSG00000171791 | BCL2     | protein_coding | chr18      | 60792463    |
| MIMAT0000065 | hsa-let-7d-5p  | ENSG00000171791 | BCL2     | protein_coding | chr18      | 60792463    |
| MIMAT0000066 | hsa-let-7e-5p  | ENSG00000171791 | BCL2     | protein_coding | chr18      | 60792463    |
| MIMAT0000067 | hsa-let-7f-5p  | ENSG00000171791 | BCL2     | protein_coding | chr18      | 60792463    |
| MIMAT0000068 | hsa-miR-15a-5p | ENSG00000171791 | BCL2     | protein_coding | chr18      | 60793253    |
| MIMAT0000068 | hsa-miR-15a-5p | ENSG00000171791 | BCL2     | protein_coding | chr18      | 60793323    |
| MIMAT0000068 | hsa-miR-15a-5p | ENSG00000171791 | BCL2     | protein_coding | chr18      | 60794055    |
| MIMAT0000068 | hsa-miR-15a-5p | ENSG00000171791 | BCL2     | protein_coding | chr18      | 60795399    |
| MIMAT0000069 | hsa-miR-16-5p  | ENSG00000171791 | BCL2     | protein_coding | chr18      | 60793253    |
| MIMAT0000069 | hsa-miR-16-5p  | ENSG00000171791 | BCL2     | protein_coding | chr18      | 60793323    |
| MIMAT0000069 | hsa-miR-16-5p  | ENSG00000171791 | BCL2     | protein_coding | chr18      | 60794055    |
| MIMAT0000069 | hsa-miR-16-5p  | ENSG00000171791 | BCL2     | protein_coding | chr18      | 60795399    |
| MIMAT0000070 | hsa-miR-17-5p  | ENSG00000171791 | BCL2     | protein_coding | chr18      | 60790674    |
| MIMAT0000070 | hsa-miR-17-5p  | ENSG00000171791 | BCL2     | protein_coding | chr18      | 60792739    |
| MIMAT0000075 | hsa-miR-20a-5p | ENSG00000171791 | BCL2     | protein_coding | chr18      | 60790674    |
| MIMAT0000075 | hsa-miR-20a-5p | ENSG00000171791 | BCL2     | protein_coding | chr18      | 60792739    |
| MIMAT0000076 | hsa-miR-21-5p  | ENSG00000171791 | BCL2     | protein_coding | chr18      | 60795133    |
| MIMAT0000076 | hsa-miR-21-5p  | ENSG00000171791 | BCL2     | protein_coding | chr18      | 60985831    |
| MIMAT0000077 | hsa-miR-22-3p  | ENSG00000171791 | BCL2     | protein_coding | chr18      | 60791624    |
| MIMAT0000078 | hsa-miR-23a-3p | ENSG00000171791 | BCL2     | protein_coding | chr18      | 60791441    |
| MIMAT0000078 | hsa-miR-23a-3p | ENSG00000171791 | BCL2     | protein_coding | chr18      | 60792191    |
| MIMAT0000078 | hsa-miR-23a-3p | ENSG00000171791 | BCL2     | protein_coding | chr18      | 60792428    |
| MIMAT0000081 | hsa-miR-25-3p  | ENSG00000171791 | BCL2     | protein_coding | chr18      | 60791607    |
| MIMAT0000084 | hsa-miR-27a-3p | ENSG00000171791 | BCL2     | protein_coding | chr18      | 60794487    |
| MIMAT0000084 | hsa-miR-27a-3p | ENSG00000171791 | BCL2     | protein_coding | chr18      | 60795343    |
| MIMAT0000087 | hsa-miR-30a-5p | ENSG00000171791 | BCL2     | protein_coding | chr18      | 60793366    |
| MIMAT0000090 | hsa-miR-32-5p  | ENSG00000171791 | BCL2     | protein_coding | chr18      | 60791607    |
| MIMAT0000092 | hsa-miR-92a-3p | ENSG00000171791 | BCL2     | protein_coding | chr18      | 60791607    |
| MIMAT0000093 | hsa-miR-93-5p  | ENSG00000171791 | BCL2     | protein_coding | chr18      | 60790674    |
| MIMAT0000093 | hsa-miR-93-5p  | ENSG00000171791 | BCL2     | protein_coding | chr18      | 60792739    |
| MIMAT0000095 | hsa-miR-96-5p  | ENSG00000171791 | BCL2     | protein_coding | chr18      | 60793313    |
| MIMAT0000095 | hsa-miR-96-5p  | ENSG00000171791 | BCL2     | protein_coding | chr18      | 60795542    |
| MIMAT0000095 | hsa-miR-96-5p  | ENSG00000171791 | BCL2     | protein_coding | chr18      | 60795648    |

|              |                 |                 |      |                |       |          |
|--------------|-----------------|-----------------|------|----------------|-------|----------|
| MIMAT0000096 | hsa-miR-98-5p   | ENSG00000171791 | BCL2 | protein_coding | chr18 | 60792463 |
| MIMAT0000099 | hsa-miR-101-3p  | ENSG00000171791 | BCL2 | protein_coding | chr18 | 60791290 |
| MIMAT0000101 | hsa-miR-103a-3p | ENSG00000171791 | BCL2 | protein_coding | chr18 | 60793324 |
| MIMAT0000103 | hsa-miR-106a-5p | ENSG00000171791 | BCL2 | protein_coding | chr18 | 60790674 |
| MIMAT0000103 | hsa-miR-106a-5p | ENSG00000171791 | BCL2 | protein_coding | chr18 | 60792739 |
| MIMAT0000104 | hsa-miR-107     | ENSG00000171791 | BCL2 | protein_coding | chr18 | 60793324 |
| MIMAT0000222 | hsa-miR-192-5p  | ENSG00000171791 | BCL2 | protein_coding | chr18 | 60793137 |
| MIMAT0000226 | hsa-miR-196a-5p | ENSG00000171791 | BCL2 | protein_coding | chr18 | 60793888 |
| MIMAT0000227 | hsa-miR-197-3p  | ENSG00000171791 | BCL2 | protein_coding | chr18 | 60794577 |
| MIMAT0000231 | hsa-miR-199a-5p | ENSG00000171791 | BCL2 | protein_coding | chr18 | 60791185 |
| MIMAT0000231 | hsa-miR-199a-5p | ENSG00000171791 | BCL2 | protein_coding | chr18 | 60791327 |
| MIMAT0000231 | hsa-miR-199a-5p | ENSG00000171791 | BCL2 | protein_coding | chr18 | 60793865 |
| MIMAT0000241 | hsa-miR-208a-3p | ENSG00000171791 | BCL2 | protein_coding | chr18 | 60791401 |
| MIMAT0000242 | hsa-miR-129-5p  | ENSG00000171791 | BCL2 | protein_coding | chr18 | 60794328 |
| MIMAT0000244 | hsa-miR-30c-5p  | ENSG00000171791 | BCL2 | protein_coding | chr18 | 60793366 |
| MIMAT0000245 | hsa-miR-30d-5p  | ENSG00000171791 | BCL2 | protein_coding | chr18 | 60793366 |
| MIMAT0000250 | hsa-miR-139-5p  | ENSG00000171791 | BCL2 | protein_coding | chr18 | 60791122 |
| MIMAT0000250 | hsa-miR-139-5p  | ENSG00000171791 | BCL2 | protein_coding | chr18 | 60794357 |
| MIMAT0000250 | hsa-miR-139-5p  | ENSG00000171791 | BCL2 | protein_coding | chr18 | 60794527 |
| MIMAT0000250 | hsa-miR-139-5p  | ENSG00000171791 | BCL2 | protein_coding | chr18 | 60794626 |
| MIMAT0000251 | hsa-miR-147a    | ENSG00000171791 | BCL2 | protein_coding | chr18 | 60795702 |
| MIMAT0000251 | hsa-miR-147a    | ENSG00000171791 | BCL2 | protein_coding | chr18 | 60795706 |
| MIMAT0000251 | hsa-miR-147a    | ENSG00000171791 | BCL2 | protein_coding | chr18 | 60795721 |
| MIMAT0000251 | hsa-miR-147a    | ENSG00000171791 | BCL2 | protein_coding | chr18 | 60795736 |
| MIMAT0000252 | hsa-miR-7-5p    | ENSG00000171791 | BCL2 | protein_coding | chr18 | 60794189 |
| MIMAT0000255 | hsa-miR-34a-5p  | ENSG00000171791 | BCL2 | protein_coding | chr18 | 60791270 |
| MIMAT0000255 | hsa-miR-34a-5p  | ENSG00000171791 | BCL2 | protein_coding | chr18 | 60795650 |
| MIMAT0000256 | hsa-miR-181a-5p | ENSG00000171791 | BCL2 | protein_coding | chr18 | 60792956 |
| MIMAT0000256 | hsa-miR-181a-5p | ENSG00000171791 | BCL2 | protein_coding | chr18 | 60794101 |
| MIMAT0000257 | hsa-miR-181b-5p | ENSG00000171791 | BCL2 | protein_coding | chr18 | 60792956 |
| MIMAT0000257 | hsa-miR-181b-5p | ENSG00000171791 | BCL2 | protein_coding | chr18 | 60794101 |
| MIMAT0000258 | hsa-miR-181c-5p | ENSG00000171791 | BCL2 | protein_coding | chr18 | 60792956 |
| MIMAT0000258 | hsa-miR-181c-5p | ENSG00000171791 | BCL2 | protein_coding | chr18 | 60794101 |
| MIMAT0000259 | hsa-miR-182-5p  | ENSG00000171791 | BCL2 | protein_coding | chr18 | 60793313 |
| MIMAT0000259 | hsa-miR-182-5p  | ENSG00000171791 | BCL2 | protein_coding | chr18 | 60795542 |
| MIMAT0000259 | hsa-miR-182-5p  | ENSG00000171791 | BCL2 | protein_coding | chr18 | 60795648 |
| MIMAT0000261 | hsa-miR-183-5p  | ENSG00000171791 | BCL2 | protein_coding | chr18 | 60790642 |
| MIMAT0000263 | hsa-miR-199b-5p | ENSG00000171791 | BCL2 | protein_coding | chr18 | 60791185 |
| MIMAT0000263 | hsa-miR-199b-5p | ENSG00000171791 | BCL2 | protein_coding | chr18 | 60791327 |
| MIMAT0000263 | hsa-miR-199b-5p | ENSG00000171791 | BCL2 | protein_coding | chr18 | 60793865 |
| MIMAT0000265 | hsa-miR-204-5p  | ENSG00000171791 | BCL2 | protein_coding | chr18 | 60795643 |
| MIMAT0000266 | hsa-miR-205-5p  | ENSG00000171791 | BCL2 | protein_coding | chr18 | 60794574 |
| MIMAT0000268 | hsa-miR-211-5p  | ENSG00000171791 | BCL2 | protein_coding | chr18 | 60795643 |
| MIMAT0000271 | hsa-miR-214-3p  | ENSG00000171791 | BCL2 | protein_coding | chr18 | 60795398 |
| MIMAT0000272 | hsa-miR-215-5p  | ENSG00000171791 | BCL2 | protein_coding | chr18 | 60793137 |
| MIMAT0000273 | hsa-miR-216a-5p | ENSG00000171791 | BCL2 | protein_coding | chr18 | 60793952 |
| MIMAT0000273 | hsa-miR-216a-5p | ENSG00000171791 | BCL2 | protein_coding | chr18 | 60795197 |
| MIMAT0000274 | hsa-miR-217     | ENSG00000171791 | BCL2 | protein_coding | chr18 | 60791551 |
| MIMAT0000275 | hsa-miR-218-5p  | ENSG00000171791 | BCL2 | protein_coding | chr18 | 60791202 |
| MIMAT0000275 | hsa-miR-218-5p  | ENSG00000171791 | BCL2 | protein_coding | chr18 | 60794523 |
| MIMAT0000276 | hsa-miR-219a-5p | ENSG00000171791 | BCL2 | protein_coding | chr18 | 60791348 |
| MIMAT0000278 | hsa-miR-221-3p  | ENSG00000171791 | BCL2 | protein_coding | chr18 | 60792386 |
| MIMAT0000278 | hsa-miR-221-3p  | ENSG00000171791 | BCL2 | protein_coding | chr18 | 60794526 |
| MIMAT0000279 | hsa-miR-222-3p  | ENSG00000171791 | BCL2 | protein_coding | chr18 | 60792386 |
| MIMAT0000279 | hsa-miR-222-3p  | ENSG00000171791 | BCL2 | protein_coding | chr18 | 60794526 |
| MIMAT0000281 | hsa-miR-224-5p  | ENSG00000171791 | BCL2 | protein_coding | chr18 | 60794461 |
| MIMAT0000318 | hsa-miR-200b-3p | ENSG00000171791 | BCL2 | protein_coding | chr18 | 60793032 |
| MIMAT0000318 | hsa-miR-200b-3p | ENSG00000171791 | BCL2 | protein_coding | chr18 | 60793165 |
| MIMAT0000318 | hsa-miR-200b-3p | ENSG00000171791 | BCL2 | protein_coding | chr18 | 60795143 |
| MIMAT0000414 | hsa-let-7g-5p   | ENSG00000171791 | BCL2 | protein_coding | chr18 | 60792463 |
| MIMAT0000415 | hsa-let-7i-5p   | ENSG00000171791 | BCL2 | protein_coding | chr18 | 60792463 |
| MIMAT0000417 | hsa-miR-15b-5p  | ENSG00000171791 | BCL2 | protein_coding | chr18 | 60793253 |
| MIMAT0000417 | hsa-miR-15b-5p  | ENSG00000171791 | BCL2 | protein_coding | chr18 | 60793323 |
| MIMAT0000417 | hsa-miR-15b-5p  | ENSG00000171791 | BCL2 | protein_coding | chr18 | 60794055 |
| MIMAT0000417 | hsa-miR-15b-5p  | ENSG00000171791 | BCL2 | protein_coding | chr18 | 60795399 |

|              |                 |                 |      |                |       |          |
|--------------|-----------------|-----------------|------|----------------|-------|----------|
| MIMAT0000418 | hsa-miR-23b-3p  | ENSG00000171791 | BCL2 | protein_coding | chr18 | 60791441 |
| MIMAT0000418 | hsa-miR-23b-3p  | ENSG00000171791 | BCL2 | protein_coding | chr18 | 60792191 |
| MIMAT0000418 | hsa-miR-23b-3p  | ENSG00000171791 | BCL2 | protein_coding | chr18 | 60792428 |
| MIMAT0000419 | hsa-miR-27b-3p  | ENSG00000171791 | BCL2 | protein_coding | chr18 | 60794487 |
| MIMAT0000419 | hsa-miR-27b-3p  | ENSG00000171791 | BCL2 | protein_coding | chr18 | 60795343 |
| MIMAT0000420 | hsa-miR-30b-5p  | ENSG00000171791 | BCL2 | protein_coding | chr18 | 60793366 |
| MIMAT0000423 | hsa-miR-125b-5p | ENSG00000171791 | BCL2 | protein_coding | chr18 | 60792304 |
| MIMAT0000423 | hsa-miR-125b-5p | ENSG00000171791 | BCL2 | protein_coding | chr18 | 60793433 |
| MIMAT0000425 | hsa-miR-130a-3p | ENSG00000171791 | BCL2 | protein_coding | chr18 | 60792741 |
| MIMAT0000425 | hsa-miR-130a-3p | ENSG00000171791 | BCL2 | protein_coding | chr18 | 60793021 |
| MIMAT0000431 | hsa-miR-140-5p  | ENSG00000171791 | BCL2 | protein_coding | chr18 | 60795551 |
| MIMAT0000432 | hsa-miR-141-3p  | ENSG00000171791 | BCL2 | protein_coding | chr18 | 60790864 |
| MIMAT0000435 | hsa-miR-143-3p  | ENSG00000171791 | BCL2 | protein_coding | chr18 | 60791332 |
| MIMAT0000435 | hsa-miR-143-3p  | ENSG00000171791 | BCL2 | protein_coding | chr18 | 60794034 |
| MIMAT0000436 | hsa-miR-144-3p  | ENSG00000171791 | BCL2 | protein_coding | chr18 | 60791290 |
| MIMAT0000437 | hsa-miR-145-5p  | ENSG00000171791 | BCL2 | protein_coding | chr18 | 60791326 |
| MIMAT0000439 | hsa-miR-153-3p  | ENSG00000171791 | BCL2 | protein_coding | chr18 | 60791336 |
| MIMAT0000439 | hsa-miR-153-3p  | ENSG00000171791 | BCL2 | protein_coding | chr18 | 60792743 |
| MIMAT0000439 | hsa-miR-153-3p  | ENSG00000171791 | BCL2 | protein_coding | chr18 | 60795794 |
| MIMAT0000439 | hsa-miR-153-3p  | ENSG00000171791 | BCL2 | protein_coding | chr18 | 60795827 |
| MIMAT0000440 | hsa-miR-191-5p  | ENSG00000171791 | BCL2 | protein_coding | chr18 | 60791619 |
| MIMAT0000441 | hsa-miR-9-5p    | ENSG00000171791 | BCL2 | protein_coding | chr18 | 60795646 |
| MIMAT0000442 | hsa-miR-9-3p    | ENSG00000171791 | BCL2 | protein_coding | chr18 | 60793250 |
| MIMAT0000442 | hsa-miR-9-3p    | ENSG00000171791 | BCL2 | protein_coding | chr18 | 60794052 |
| MIMAT0000442 | hsa-miR-9-3p    | ENSG00000171791 | BCL2 | protein_coding | chr18 | 60794469 |
| MIMAT0000443 | hsa-miR-125a-5p | ENSG00000171791 | BCL2 | protein_coding | chr18 | 60792304 |
| MIMAT0000443 | hsa-miR-125a-5p | ENSG00000171791 | BCL2 | protein_coding | chr18 | 60793433 |
| MIMAT0000445 | hsa-miR-126-3p  | ENSG00000171791 | BCL2 | protein_coding | chr18 | 60791667 |
| MIMAT0000447 | hsa-miR-134-5p  | ENSG00000171791 | BCL2 | protein_coding | chr18 | 60790650 |
| MIMAT0000447 | hsa-miR-134-5p  | ENSG00000171791 | BCL2 | protein_coding | chr18 | 60792532 |
| MIMAT0000448 | hsa-miR-136-5p  | ENSG00000171791 | BCL2 | protein_coding | chr18 | 60791305 |
| MIMAT0000448 | hsa-miR-136-5p  | ENSG00000171791 | BCL2 | protein_coding | chr18 | 60793297 |
| MIMAT0000450 | hsa-miR-149-5p  | ENSG00000171791 | BCL2 | protein_coding | chr18 | 60793455 |
| MIMAT0000451 | hsa-miR-150-5p  | ENSG00000171791 | BCL2 | protein_coding | chr18 | 60794659 |
| MIMAT0000451 | hsa-miR-150-5p  | ENSG00000171791 | BCL2 | protein_coding | chr18 | 60795242 |
| MIMAT0000455 | hsa-miR-185-5p  | ENSG00000171791 | BCL2 | protein_coding | chr18 | 60792479 |
| MIMAT0000456 | hsa-miR-186-5p  | ENSG00000171791 | BCL2 | protein_coding | chr18 | 60790974 |
| MIMAT0000456 | hsa-miR-186-5p  | ENSG00000171791 | BCL2 | protein_coding | chr18 | 60790990 |
| MIMAT0000456 | hsa-miR-186-5p  | ENSG00000171791 | BCL2 | protein_coding | chr18 | 60795359 |
| MIMAT0000461 | hsa-miR-195-5p  | ENSG00000171791 | BCL2 | protein_coding | chr18 | 60793253 |
| MIMAT0000461 | hsa-miR-195-5p  | ENSG00000171791 | BCL2 | protein_coding | chr18 | 60793323 |
| MIMAT0000461 | hsa-miR-195-5p  | ENSG00000171791 | BCL2 | protein_coding | chr18 | 60794055 |
| MIMAT0000461 | hsa-miR-195-5p  | ENSG00000171791 | BCL2 | protein_coding | chr18 | 60795399 |
| MIMAT0000510 | hsa-miR-320a    | ENSG00000171791 | BCL2 | protein_coding | chr18 | 60790847 |
| MIMAT0000510 | hsa-miR-320a    | ENSG00000171791 | BCL2 | protein_coding | chr18 | 60790978 |
| MIMAT0000510 | hsa-miR-320a    | ENSG00000171791 | BCL2 | protein_coding | chr18 | 60792280 |
| MIMAT0000510 | hsa-miR-320a    | ENSG00000171791 | BCL2 | protein_coding | chr18 | 60793850 |
| MIMAT0000617 | hsa-miR-200c-3p | ENSG00000171791 | BCL2 | protein_coding | chr18 | 60793032 |
| MIMAT0000617 | hsa-miR-200c-3p | ENSG00000171791 | BCL2 | protein_coding | chr18 | 60793165 |
| MIMAT0000617 | hsa-miR-200c-3p | ENSG00000171791 | BCL2 | protein_coding | chr18 | 60795143 |
| MIMAT0000646 | hsa-miR-155-5p  | ENSG00000171791 | BCL2 | protein_coding | chr18 | 60794133 |
| MIMAT0000646 | hsa-miR-155-5p  | ENSG00000171791 | BCL2 | protein_coding | chr18 | 60794141 |
| MIMAT0000646 | hsa-miR-155-5p  | ENSG00000171791 | BCL2 | protein_coding | chr18 | 60794277 |
| MIMAT0000680 | hsa-miR-106b-5p | ENSG00000171791 | BCL2 | protein_coding | chr18 | 60790674 |
| MIMAT0000680 | hsa-miR-106b-5p | ENSG00000171791 | BCL2 | protein_coding | chr18 | 60792739 |
| MIMAT0000682 | hsa-miR-200a-3p | ENSG00000171791 | BCL2 | protein_coding | chr18 | 60790864 |
| MIMAT0000684 | hsa-miR-302a-3p | ENSG00000171791 | BCL2 | protein_coding | chr18 | 60790675 |
| MIMAT0000684 | hsa-miR-302a-3p | ENSG00000171791 | BCL2 | protein_coding | chr18 | 60792740 |
| MIMAT0000684 | hsa-miR-302a-3p | ENSG00000171791 | BCL2 | protein_coding | chr18 | 60793020 |
| MIMAT0000686 | hsa-miR-34c-5p  | ENSG00000171791 | BCL2 | protein_coding | chr18 | 60791270 |
| MIMAT0000686 | hsa-miR-34c-5p  | ENSG00000171791 | BCL2 | protein_coding | chr18 | 60795650 |
| MIMAT0000688 | hsa-miR-301a-3p | ENSG00000171791 | BCL2 | protein_coding | chr18 | 60792741 |
| MIMAT0000688 | hsa-miR-301a-3p | ENSG00000171791 | BCL2 | protein_coding | chr18 | 60793021 |
| MIMAT0000690 | hsa-miR-296-5p  | ENSG00000171791 | BCL2 | protein_coding | chr18 | 60791065 |
| MIMAT0000690 | hsa-miR-296-5p  | ENSG00000171791 | BCL2 | protein_coding | chr18 | 60794600 |

|              |                 |                 |      |                |       |          |
|--------------|-----------------|-----------------|------|----------------|-------|----------|
| MIMAT0000691 | hsa-miR-130b-3p | ENSG00000171791 | BCL2 | protein_coding | chr18 | 60792741 |
| MIMAT0000691 | hsa-miR-130b-3p | ENSG00000171791 | BCL2 | protein_coding | chr18 | 60793021 |
| MIMAT0000692 | hsa-miR-30e-5p  | ENSG00000171791 | BCL2 | protein_coding | chr18 | 60793366 |
| MIMAT0000707 | hsa-miR-363-3p  | ENSG00000171791 | BCL2 | protein_coding | chr18 | 60791607 |
| MIMAT0000710 | hsa-miR-365a-3p | ENSG00000171791 | BCL2 | protein_coding | chr18 | 60794142 |
| MIMAT0000710 | hsa-miR-365a-3p | ENSG00000171791 | BCL2 | protein_coding | chr18 | 60794278 |
| MIMAT0000715 | hsa-miR-302b-3p | ENSG00000171791 | BCL2 | protein_coding | chr18 | 60790675 |
| MIMAT0000715 | hsa-miR-302b-3p | ENSG00000171791 | BCL2 | protein_coding | chr18 | 60792740 |
| MIMAT0000715 | hsa-miR-302b-3p | ENSG00000171791 | BCL2 | protein_coding | chr18 | 60793020 |
| MIMAT0000717 | hsa-miR-302c-3p | ENSG00000171791 | BCL2 | protein_coding | chr18 | 60790675 |
| MIMAT0000717 | hsa-miR-302c-3p | ENSG00000171791 | BCL2 | protein_coding | chr18 | 60792740 |
| MIMAT0000717 | hsa-miR-302c-3p | ENSG00000171791 | BCL2 | protein_coding | chr18 | 60793020 |
| MIMAT0000718 | hsa-miR-302d-3p | ENSG00000171791 | BCL2 | protein_coding | chr18 | 60790675 |
| MIMAT0000718 | hsa-miR-302d-3p | ENSG00000171791 | BCL2 | protein_coding | chr18 | 60792740 |
| MIMAT0000718 | hsa-miR-302d-3p | ENSG00000171791 | BCL2 | protein_coding | chr18 | 60793020 |
| MIMAT0000719 | hsa-miR-367-3p  | ENSG00000171791 | BCL2 | protein_coding | chr18 | 60791607 |
| MIMAT0000721 | hsa-miR-369-3p  | ENSG00000171791 | BCL2 | protein_coding | chr18 | 60790955 |
| MIMAT0000721 | hsa-miR-369-3p  | ENSG00000171791 | BCL2 | protein_coding | chr18 | 60791482 |
| MIMAT0000721 | hsa-miR-369-3p  | ENSG00000171791 | BCL2 | protein_coding | chr18 | 60793382 |
| MIMAT0000723 | hsa-miR-371a-3p | ENSG00000171791 | BCL2 | protein_coding | chr18 | 60790676 |
| MIMAT0000724 | hsa-miR-372-3p  | ENSG00000171791 | BCL2 | protein_coding | chr18 | 60790675 |
| MIMAT0000724 | hsa-miR-372-3p  | ENSG00000171791 | BCL2 | protein_coding | chr18 | 60792740 |
| MIMAT0000724 | hsa-miR-372-3p  | ENSG00000171791 | BCL2 | protein_coding | chr18 | 60793020 |
| MIMAT0000726 | hsa-miR-373-3p  | ENSG00000171791 | BCL2 | protein_coding | chr18 | 60790675 |
| MIMAT0000726 | hsa-miR-373-3p  | ENSG00000171791 | BCL2 | protein_coding | chr18 | 60792740 |
| MIMAT0000726 | hsa-miR-373-3p  | ENSG00000171791 | BCL2 | protein_coding | chr18 | 60793020 |
| MIMAT0000727 | hsa-miR-374a-5p | ENSG00000171791 | BCL2 | protein_coding | chr18 | 60790954 |
| MIMAT0000727 | hsa-miR-374a-5p | ENSG00000171791 | BCL2 | protein_coding | chr18 | 60792350 |
| MIMAT0000727 | hsa-miR-374a-5p | ENSG00000171791 | BCL2 | protein_coding | chr18 | 60794131 |
| MIMAT0000727 | hsa-miR-374a-5p | ENSG00000171791 | BCL2 | protein_coding | chr18 | 60985835 |
| MIMAT0000735 | hsa-miR-380-3p  | ENSG00000171791 | BCL2 | protein_coding | chr18 | 60793364 |
| MIMAT0000735 | hsa-miR-380-3p  | ENSG00000171791 | BCL2 | protein_coding | chr18 | 60793705 |
| MIMAT0000735 | hsa-miR-380-3p  | ENSG00000171791 | BCL2 | protein_coding | chr18 | 60794382 |
| MIMAT0000735 | hsa-miR-380-3p  | ENSG00000171791 | BCL2 | protein_coding | chr18 | 60795622 |
| MIMAT0000736 | hsa-miR-381-3p  | ENSG00000171791 | BCL2 | protein_coding | chr18 | 60790857 |
| MIMAT0000736 | hsa-miR-381-3p  | ENSG00000171791 | BCL2 | protein_coding | chr18 | 60794009 |
| MIMAT0000738 | hsa-miR-383-5p  | ENSG00000171791 | BCL2 | protein_coding | chr18 | 60792019 |
| MIMAT0000738 | hsa-miR-383-5p  | ENSG00000171791 | BCL2 | protein_coding | chr18 | 60795426 |
| MIMAT0000751 | hsa-miR-330-3p  | ENSG00000171791 | BCL2 | protein_coding | chr18 | 60793849 |
| MIMAT0000753 | hsa-miR-342-3p  | ENSG00000171791 | BCL2 | protein_coding | chr18 | 60790584 |
| MIMAT0000753 | hsa-miR-342-3p  | ENSG00000171791 | BCL2 | protein_coding | chr18 | 60793980 |
| MIMAT0000753 | hsa-miR-342-3p  | ENSG00000171791 | BCL2 | protein_coding | chr18 | 60794486 |
| MIMAT0000754 | hsa-miR-337-3p  | ENSG00000171791 | BCL2 | protein_coding | chr18 | 60795150 |
| MIMAT0000755 | hsa-miR-323a-3p | ENSG00000171791 | BCL2 | protein_coding | chr18 | 60792109 |
| MIMAT0000756 | hsa-miR-326     | ENSG00000171791 | BCL2 | protein_coding | chr18 | 60791650 |
| MIMAT0000760 | hsa-miR-331-3p  | ENSG00000171791 | BCL2 | protein_coding | chr18 | 60792572 |
| MIMAT0000761 | hsa-miR-324-5p  | ENSG00000171791 | BCL2 | protein_coding | chr18 | 60791323 |
| MIMAT0000762 | hsa-miR-324-3p  | ENSG00000171791 | BCL2 | protein_coding | chr18 | 60792569 |
| MIMAT0000763 | hsa-miR-338-3p  | ENSG00000171791 | BCL2 | protein_coding | chr18 | 60795397 |
| MIMAT0000765 | hsa-miR-335-5p  | ENSG00000171791 | BCL2 | protein_coding | chr18 | 60793053 |
| MIMAT0000765 | hsa-miR-335-5p  | ENSG00000171791 | BCL2 | protein_coding | chr18 | 60793941 |
| MIMAT0000772 | hsa-miR-345-5p  | ENSG00000171791 | BCL2 | protein_coding | chr18 | 60792038 |
| MIMAT0000772 | hsa-miR-345-5p  | ENSG00000171791 | BCL2 | protein_coding | chr18 | 60793293 |
| MIMAT0000773 | hsa-miR-346     | ENSG00000171791 | BCL2 | protein_coding | chr18 | 60795447 |
| MIMAT0001075 | hsa-miR-384     | ENSG00000171791 | BCL2 | protein_coding | chr18 | 60794204 |
| MIMAT0001075 | hsa-miR-384     | ENSG00000171791 | BCL2 | protein_coding | chr18 | 60795149 |
| MIMAT0001080 | hsa-miR-196b-5p | ENSG00000171791 | BCL2 | protein_coding | chr18 | 60793888 |
| MIMAT0001341 | hsa-miR-424-5p  | ENSG00000171791 | BCL2 | protein_coding | chr18 | 60793253 |
| MIMAT0001341 | hsa-miR-424-5p  | ENSG00000171791 | BCL2 | protein_coding | chr18 | 60793323 |
| MIMAT0001341 | hsa-miR-424-5p  | ENSG00000171791 | BCL2 | protein_coding | chr18 | 60794055 |
| MIMAT0001341 | hsa-miR-424-5p  | ENSG00000171791 | BCL2 | protein_coding | chr18 | 60795399 |
| MIMAT0001413 | hsa-miR-20b-5p  | ENSG00000171791 | BCL2 | protein_coding | chr18 | 60790674 |
| MIMAT0001413 | hsa-miR-20b-5p  | ENSG00000171791 | BCL2 | protein_coding | chr18 | 60792739 |
| MIMAT0001532 | hsa-miR-448     | ENSG00000171791 | BCL2 | protein_coding | chr18 | 60791336 |
| MIMAT0001532 | hsa-miR-448     | ENSG00000171791 | BCL2 | protein_coding | chr18 | 60792743 |



|              |                 |                 |      |                |       |          |
|--------------|-----------------|-----------------|------|----------------|-------|----------|
| MIMAT0002837 | hsa-miR-519b-3p | ENSG00000171791 | BCL2 | protein_coding | chr18 | 60792740 |
| MIMAT0002837 | hsa-miR-519b-3p | ENSG00000171791 | BCL2 | protein_coding | chr18 | 60793020 |
| MIMAT0002838 | hsa-miR-525-5p  | ENSG00000171791 | BCL2 | protein_coding | chr18 | 60791275 |
| MIMAT0002842 | hsa-miR-518f-3p | ENSG00000171791 | BCL2 | protein_coding | chr18 | 60795484 |
| MIMAT0002843 | hsa-miR-520b    | ENSG00000171791 | BCL2 | protein_coding | chr18 | 60790675 |
| MIMAT0002843 | hsa-miR-520b    | ENSG00000171791 | BCL2 | protein_coding | chr18 | 60792740 |
| MIMAT0002843 | hsa-miR-520b    | ENSG00000171791 | BCL2 | protein_coding | chr18 | 60793020 |
| MIMAT0002844 | hsa-miR-518b    | ENSG00000171791 | BCL2 | protein_coding | chr18 | 60795484 |
| MIMAT0002846 | hsa-miR-520c-3p | ENSG00000171791 | BCL2 | protein_coding | chr18 | 60790675 |
| MIMAT0002846 | hsa-miR-520c-3p | ENSG00000171791 | BCL2 | protein_coding | chr18 | 60792740 |
| MIMAT0002846 | hsa-miR-520c-3p | ENSG00000171791 | BCL2 | protein_coding | chr18 | 60793020 |
| MIMAT0002848 | hsa-miR-518c-3p | ENSG00000171791 | BCL2 | protein_coding | chr18 | 60795484 |
| MIMAT0002849 | hsa-miR-524-5p  | ENSG00000171791 | BCL2 | protein_coding | chr18 | 60790858 |
| MIMAT0002853 | hsa-miR-519d-3p | ENSG00000171791 | BCL2 | protein_coding | chr18 | 60790674 |
| MIMAT0002853 | hsa-miR-519d-3p | ENSG00000171791 | BCL2 | protein_coding | chr18 | 60792739 |
| MIMAT0002855 | hsa-miR-520d-5p | ENSG00000171791 | BCL2 | protein_coding | chr18 | 60790858 |
| MIMAT0002856 | hsa-miR-520d-3p | ENSG00000171791 | BCL2 | protein_coding | chr18 | 60790675 |
| MIMAT0002856 | hsa-miR-520d-3p | ENSG00000171791 | BCL2 | protein_coding | chr18 | 60792740 |
| MIMAT0002856 | hsa-miR-520d-3p | ENSG00000171791 | BCL2 | protein_coding | chr18 | 60793020 |
| MIMAT0002858 | hsa-miR-520g-3p | ENSG00000171791 | BCL2 | protein_coding | chr18 | 60790673 |
| MIMAT0002858 | hsa-miR-520g-3p | ENSG00000171791 | BCL2 | protein_coding | chr18 | 60794107 |
| MIMAT0002858 | hsa-miR-520g-3p | ENSG00000171791 | BCL2 | protein_coding | chr18 | 60794459 |
| MIMAT0002859 | hsa-miR-516b-5p | ENSG00000171791 | BCL2 | protein_coding | chr18 | 60791059 |
| MIMAT0002859 | hsa-miR-516b-5p | ENSG00000171791 | BCL2 | protein_coding | chr18 | 60791651 |
| MIMAT0002863 | hsa-miR-518a-3p | ENSG00000171791 | BCL2 | protein_coding | chr18 | 60795484 |
| MIMAT0002864 | hsa-miR-518d-3p | ENSG00000171791 | BCL2 | protein_coding | chr18 | 60795484 |
| MIMAT0002867 | hsa-miR-520h    | ENSG00000171791 | BCL2 | protein_coding | chr18 | 60790673 |
| MIMAT0002867 | hsa-miR-520h    | ENSG00000171791 | BCL2 | protein_coding | chr18 | 60794107 |
| MIMAT0002867 | hsa-miR-520h    | ENSG00000171791 | BCL2 | protein_coding | chr18 | 60794459 |
| MIMAT0002868 | hsa-miR-522-3p  | ENSG00000171791 | BCL2 | protein_coding | chr18 | 60792436 |
| MIMAT0002868 | hsa-miR-522-3p  | ENSG00000171791 | BCL2 | protein_coding | chr18 | 60794123 |
| MIMAT0002868 | hsa-miR-522-3p  | ENSG00000171791 | BCL2 | protein_coding | chr18 | 60794536 |
| MIMAT0002869 | hsa-miR-519a-3p | ENSG00000171791 | BCL2 | protein_coding | chr18 | 60790675 |
| MIMAT0002869 | hsa-miR-519a-3p | ENSG00000171791 | BCL2 | protein_coding | chr18 | 60792740 |
| MIMAT0002869 | hsa-miR-519a-3p | ENSG00000171791 | BCL2 | protein_coding | chr18 | 60793020 |
| MIMAT0002870 | hsa-miR-499a-5p | ENSG00000171791 | BCL2 | protein_coding | chr18 | 60791401 |
| MIMAT0002874 | hsa-miR-503-5p  | ENSG00000171791 | BCL2 | protein_coding | chr18 | 60793253 |
| MIMAT0002874 | hsa-miR-503-5p  | ENSG00000171791 | BCL2 | protein_coding | chr18 | 60793323 |
| MIMAT0002874 | hsa-miR-503-5p  | ENSG00000171791 | BCL2 | protein_coding | chr18 | 60794055 |
| MIMAT0002874 | hsa-miR-503-5p  | ENSG00000171791 | BCL2 | protein_coding | chr18 | 60795399 |
| MIMAT0002877 | hsa-miR-513a-5p | ENSG00000171791 | BCL2 | protein_coding | chr18 | 60794487 |
| MIMAT0002877 | hsa-miR-513a-5p | ENSG00000171791 | BCL2 | protein_coding | chr18 | 60795343 |
| MIMAT0002880 | hsa-miR-508-3p  | ENSG00000171791 | BCL2 | protein_coding | chr18 | 60791348 |
| MIMAT0002881 | hsa-miR-509-3p  | ENSG00000171791 | BCL2 | protein_coding | chr18 | 60793333 |
| MIMAT0002882 | hsa-miR-510-5p  | ENSG00000171791 | BCL2 | protein_coding | chr18 | 60791108 |
| MIMAT0002882 | hsa-miR-510-5p  | ENSG00000171791 | BCL2 | protein_coding | chr18 | 60793899 |
| MIMAT0002882 | hsa-miR-510-5p  | ENSG00000171791 | BCL2 | protein_coding | chr18 | 60795005 |
| MIMAT0002883 | hsa-miR-514a-3p | ENSG00000171791 | BCL2 | protein_coding | chr18 | 60793358 |
| MIMAT0003150 | hsa-miR-455-5p  | ENSG00000171791 | BCL2 | protein_coding | chr18 | 60794522 |
| MIMAT0003161 | hsa-miR-493-3p  | ENSG00000171791 | BCL2 | protein_coding | chr18 | 60790817 |
| MIMAT0003161 | hsa-miR-493-3p  | ENSG00000171791 | BCL2 | protein_coding | chr18 | 60790949 |
| MIMAT0003161 | hsa-miR-493-3p  | ENSG00000171791 | BCL2 | protein_coding | chr18 | 60791519 |
| MIMAT0003215 | hsa-miR-552-3p  | ENSG00000171791 | BCL2 | protein_coding | chr18 | 60794489 |
| MIMAT0003218 | hsa-miR-92b-3p  | ENSG00000171791 | BCL2 | protein_coding | chr18 | 60791607 |
| MIMAT0003220 | hsa-miR-556-5p  | ENSG00000171791 | BCL2 | protein_coding | chr18 | 60791051 |
| MIMAT0003241 | hsa-miR-576-5p  | ENSG00000171791 | BCL2 | protein_coding | chr18 | 60792967 |
| MIMAT0003241 | hsa-miR-576-5p  | ENSG00000171791 | BCL2 | protein_coding | chr18 | 60793247 |
| MIMAT0003241 | hsa-miR-576-5p  | ENSG00000171791 | BCL2 | protein_coding | chr18 | 60794180 |
| MIMAT0003242 | hsa-miR-577     | ENSG00000171791 | BCL2 | protein_coding | chr18 | 60793945 |
| MIMAT0003242 | hsa-miR-577     | ENSG00000171791 | BCL2 | protein_coding | chr18 | 60794119 |
| MIMAT0003242 | hsa-miR-577     | ENSG00000171791 | BCL2 | protein_coding | chr18 | 60794295 |
| MIMAT0003242 | hsa-miR-577     | ENSG00000171791 | BCL2 | protein_coding | chr18 | 60794368 |
| MIMAT0003244 | hsa-miR-579-3p  | ENSG00000171791 | BCL2 | protein_coding | chr18 | 60791692 |
| MIMAT0003244 | hsa-miR-579-3p  | ENSG00000171791 | BCL2 | protein_coding | chr18 | 60794464 |
| MIMAT0003247 | hsa-miR-582-5p  | ENSG00000171791 | BCL2 | protein_coding | chr18 | 60791123 |

|              |                 |                 |      |                |       |          |
|--------------|-----------------|-----------------|------|----------------|-------|----------|
| MIMAT0003247 | hsa-miR-582-5p  | ENSG00000171791 | BCL2 | protein_coding | chr18 | 60791289 |
| MIMAT0003247 | hsa-miR-582-5p  | ENSG00000171791 | BCL2 | protein_coding | chr18 | 60792163 |
| MIMAT0003247 | hsa-miR-582-5p  | ENSG00000171791 | BCL2 | protein_coding | chr18 | 60793039 |
| MIMAT0003247 | hsa-miR-582-5p  | ENSG00000171791 | BCL2 | protein_coding | chr18 | 60794358 |
| MIMAT0003247 | hsa-miR-582-5p  | ENSG00000171791 | BCL2 | protein_coding | chr18 | 60794627 |
| MIMAT0003255 | hsa-miR-588     | ENSG00000171791 | BCL2 | protein_coding | chr18 | 60790696 |
| MIMAT0003255 | hsa-miR-588     | ENSG00000171791 | BCL2 | protein_coding | chr18 | 60793862 |
| MIMAT0003255 | hsa-miR-588     | ENSG00000171791 | BCL2 | protein_coding | chr18 | 60794546 |
| MIMAT0003258 | hsa-miR-590-5p  | ENSG00000171791 | BCL2 | protein_coding | chr18 | 60795133 |
| MIMAT0003289 | hsa-miR-620     | ENSG00000171791 | BCL2 | protein_coding | chr18 | 60790704 |
| MIMAT0003289 | hsa-miR-620     | ENSG00000171791 | BCL2 | protein_coding | chr18 | 60792478 |
| MIMAT0003294 | hsa-miR-625-5p  | ENSG00000171791 | BCL2 | protein_coding | chr18 | 60987019 |
| MIMAT0003296 | hsa-miR-627-5p  | ENSG00000171791 | BCL2 | protein_coding | chr18 | 60795264 |
| MIMAT0003311 | hsa-miR-641     | ENSG00000171791 | BCL2 | protein_coding | chr18 | 60791373 |
| MIMAT0003311 | hsa-miR-641     | ENSG00000171791 | BCL2 | protein_coding | chr18 | 60792002 |
| MIMAT0003311 | hsa-miR-641     | ENSG00000171791 | BCL2 | protein_coding | chr18 | 60793198 |
| MIMAT0003311 | hsa-miR-641     | ENSG00000171791 | BCL2 | protein_coding | chr18 | 60795567 |
| MIMAT0003312 | hsa-miR-642a-5p | ENSG00000171791 | BCL2 | protein_coding | chr18 | 60794621 |
| MIMAT0003312 | hsa-miR-642a-5p | ENSG00000171791 | BCL2 | protein_coding | chr18 | 60795329 |
| MIMAT0003320 | hsa-miR-650     | ENSG00000171791 | BCL2 | protein_coding | chr18 | 60795299 |
| MIMAT0003321 | hsa-miR-651-5p  | ENSG00000171791 | BCL2 | protein_coding | chr18 | 60792213 |
| MIMAT0003321 | hsa-miR-651-5p  | ENSG00000171791 | BCL2 | protein_coding | chr18 | 60794439 |
| MIMAT0003327 | hsa-miR-449b-5p | ENSG00000171791 | BCL2 | protein_coding | chr18 | 60791270 |
| MIMAT0003327 | hsa-miR-449b-5p | ENSG00000171791 | BCL2 | protein_coding | chr18 | 60795650 |
| MIMAT0003328 | hsa-miR-653-5p  | ENSG00000171791 | BCL2 | protein_coding | chr18 | 60791234 |
| MIMAT0003330 | hsa-miR-654-5p  | ENSG00000171791 | BCL2 | protein_coding | chr18 | 60794492 |
| MIMAT0003331 | hsa-miR-655-3p  | ENSG00000171791 | BCL2 | protein_coding | chr18 | 60794113 |
| MIMAT0003332 | hsa-miR-656-3p  | ENSG00000171791 | BCL2 | protein_coding | chr18 | 60790613 |
| MIMAT0003332 | hsa-miR-656-3p  | ENSG00000171791 | BCL2 | protein_coding | chr18 | 60793215 |
| MIMAT0003332 | hsa-miR-656-3p  | ENSG00000171791 | BCL2 | protein_coding | chr18 | 60795797 |
| MIMAT0003338 | hsa-miR-660-5p  | ENSG00000171791 | BCL2 | protein_coding | chr18 | 60791573 |
| MIMAT0003389 | hsa-miR-542-3p  | ENSG00000171791 | BCL2 | protein_coding | chr18 | 60793868 |
| MIMAT0003389 | hsa-miR-542-3p  | ENSG00000171791 | BCL2 | protein_coding | chr18 | 60794362 |
| MIMAT0003393 | hsa-miR-425-5p  | ENSG00000171791 | BCL2 | protein_coding | chr18 | 60794414 |
| MIMAT0003879 | hsa-miR-758-3p  | ENSG00000171791 | BCL2 | protein_coding | chr18 | 60794446 |
| MIMAT0003881 | hsa-miR-668-3p  | ENSG00000171791 | BCL2 | protein_coding | chr18 | 60791008 |
| MIMAT0003881 | hsa-miR-668-3p  | ENSG00000171791 | BCL2 | protein_coding | chr18 | 60794227 |
| MIMAT0003885 | hsa-miR-454-3p  | ENSG00000171791 | BCL2 | protein_coding | chr18 | 60792741 |
| MIMAT0003885 | hsa-miR-454-3p  | ENSG00000171791 | BCL2 | protein_coding | chr18 | 60793021 |
| MIMAT0003948 | hsa-miR-770-5p  | ENSG00000171791 | BCL2 | protein_coding | chr18 | 60790907 |
| MIMAT0003948 | hsa-miR-770-5p  | ENSG00000171791 | BCL2 | protein_coding | chr18 | 60795017 |
| MIMAT0004185 | hsa-miR-802     | ENSG00000171791 | BCL2 | protein_coding | chr18 | 60790909 |
| MIMAT0004502 | hsa-miR-28-3p   | ENSG00000171791 | BCL2 | protein_coding | chr18 | 60790619 |
| MIMAT0004593 | hsa-miR-130a-5p | ENSG00000171791 | BCL2 | protein_coding | chr18 | 60791441 |
| MIMAT0004593 | hsa-miR-130a-5p | ENSG00000171791 | BCL2 | protein_coding | chr18 | 60792191 |
| MIMAT0004593 | hsa-miR-130a-5p | ENSG00000171791 | BCL2 | protein_coding | chr18 | 60792428 |
| MIMAT0004594 | hsa-miR-132-5p  | ENSG00000171791 | BCL2 | protein_coding | chr18 | 60794543 |
| MIMAT0004597 | hsa-miR-140-3p  | ENSG00000171791 | BCL2 | protein_coding | chr18 | 60791670 |
| MIMAT0004597 | hsa-miR-140-3p  | ENSG00000171791 | BCL2 | protein_coding | chr18 | 60792007 |
| MIMAT0004597 | hsa-miR-140-3p  | ENSG00000171791 | BCL2 | protein_coding | chr18 | 60794074 |
| MIMAT0004675 | hsa-miR-219a-2- | ENSG00000171791 | BCL2 | protein_coding | chr18 | 60793737 |
| MIMAT0004679 | hsa-miR-296-3p  | ENSG00000171791 | BCL2 | protein_coding | chr18 | 60987024 |
| MIMAT0004682 | hsa-miR-361-3p  | ENSG00000171791 | BCL2 | protein_coding | chr18 | 60794301 |
| MIMAT0004682 | hsa-miR-361-3p  | ENSG00000171791 | BCL2 | protein_coding | chr18 | 60795314 |
| MIMAT0004682 | hsa-miR-361-3p  | ENSG00000171791 | BCL2 | protein_coding | chr18 | 60795349 |
| MIMAT0004687 | hsa-miR-371a-5p | ENSG00000171791 | BCL2 | protein_coding | chr18 | 60790914 |
| MIMAT0004687 | hsa-miR-371a-5p | ENSG00000171791 | BCL2 | protein_coding | chr18 | 60793955 |
| MIMAT0004690 | hsa-miR-379-3p  | ENSG00000171791 | BCL2 | protein_coding | chr18 | 60793364 |
| MIMAT0004690 | hsa-miR-379-3p  | ENSG00000171791 | BCL2 | protein_coding | chr18 | 60793705 |
| MIMAT0004690 | hsa-miR-379-3p  | ENSG00000171791 | BCL2 | protein_coding | chr18 | 60794382 |
| MIMAT0004690 | hsa-miR-379-3p  | ENSG00000171791 | BCL2 | protein_coding | chr18 | 60795622 |
| MIMAT0004692 | hsa-miR-340-5p  | ENSG00000171791 | BCL2 | protein_coding | chr18 | 60791457 |
| MIMAT0004692 | hsa-miR-340-5p  | ENSG00000171791 | BCL2 | protein_coding | chr18 | 60792198 |
| MIMAT0004692 | hsa-miR-340-5p  | ENSG00000171791 | BCL2 | protein_coding | chr18 | 60792433 |
| MIMAT0004692 | hsa-miR-340-5p  | ENSG00000171791 | BCL2 | protein_coding | chr18 | 60795096 |

|              |                 |                 |      |                |       |          |
|--------------|-----------------|-----------------|------|----------------|-------|----------|
| MIMAT0004693 | hsa-miR-330-5p  | ENSG00000171791 | BCL2 | protein_coding | chr18 | 60791650 |
| MIMAT0004763 | hsa-miR-488-3p  | ENSG00000171791 | BCL2 | protein_coding | chr18 | 60792278 |
| MIMAT0004774 | hsa-miR-501-3p  | ENSG00000171791 | BCL2 | protein_coding | chr18 | 60793828 |
| MIMAT0004775 | hsa-miR-502-3p  | ENSG00000171791 | BCL2 | protein_coding | chr18 | 60793828 |
| MIMAT0004780 | hsa-miR-532-3p  | ENSG00000171791 | BCL2 | protein_coding | chr18 | 60794659 |
| MIMAT0004780 | hsa-miR-532-3p  | ENSG00000171791 | BCL2 | protein_coding | chr18 | 60795242 |
| MIMAT0004784 | hsa-miR-455-3p  | ENSG00000171791 | BCL2 | protein_coding | chr18 | 60791272 |
| MIMAT0004785 | hsa-miR-545-5p  | ENSG00000171791 | BCL2 | protein_coding | chr18 | 60790907 |
| MIMAT0004785 | hsa-miR-545-5p  | ENSG00000171791 | BCL2 | protein_coding | chr18 | 60795652 |
| MIMAT0004797 | hsa-miR-582-3p  | ENSG00000171791 | BCL2 | protein_coding | chr18 | 60790701 |
| MIMAT0004797 | hsa-miR-582-3p  | ENSG00000171791 | BCL2 | protein_coding | chr18 | 60794185 |
| MIMAT0004805 | hsa-miR-616-3p  | ENSG00000171791 | BCL2 | protein_coding | chr18 | 60791526 |
| MIMAT0004805 | hsa-miR-616-3p  | ENSG00000171791 | BCL2 | protein_coding | chr18 | 60794463 |
| MIMAT0004807 | hsa-miR-624-3p  | ENSG00000171791 | BCL2 | protein_coding | chr18 | 60790628 |
| MIMAT0004809 | hsa-miR-628-5p  | ENSG00000171791 | BCL2 | protein_coding | chr18 | 60791641 |
| MIMAT0004809 | hsa-miR-628-5p  | ENSG00000171791 | BCL2 | protein_coding | chr18 | 60794217 |
| MIMAT0004813 | hsa-miR-411-3p  | ENSG00000171791 | BCL2 | protein_coding | chr18 | 60793364 |
| MIMAT0004813 | hsa-miR-411-3p  | ENSG00000171791 | BCL2 | protein_coding | chr18 | 60793705 |
| MIMAT0004813 | hsa-miR-411-3p  | ENSG00000171791 | BCL2 | protein_coding | chr18 | 60794382 |
| MIMAT0004813 | hsa-miR-411-3p  | ENSG00000171791 | BCL2 | protein_coding | chr18 | 60795622 |
| MIMAT0004814 | hsa-miR-654-3p  | ENSG00000171791 | BCL2 | protein_coding | chr18 | 60791646 |
| MIMAT0004814 | hsa-miR-654-3p  | ENSG00000171791 | BCL2 | protein_coding | chr18 | 60794638 |
| MIMAT0004903 | hsa-miR-300     | ENSG00000171791 | BCL2 | protein_coding | chr18 | 60790857 |
| MIMAT0004903 | hsa-miR-300     | ENSG00000171791 | BCL2 | protein_coding | chr18 | 60794009 |
| MIMAT0004909 | hsa-miR-450b-5p | ENSG00000171791 | BCL2 | protein_coding | chr18 | 60791320 |
| MIMAT0004909 | hsa-miR-450b-5p | ENSG00000171791 | BCL2 | protein_coding | chr18 | 60792244 |
| MIMAT0004909 | hsa-miR-450b-5p | ENSG00000171791 | BCL2 | protein_coding | chr18 | 60795825 |
| MIMAT0004911 | hsa-miR-874-3p  | ENSG00000171791 | BCL2 | protein_coding | chr18 | 60792302 |
| MIMAT0004916 | hsa-miR-888-5p  | ENSG00000171791 | BCL2 | protein_coding | chr18 | 60790913 |
| MIMAT0004916 | hsa-miR-888-5p  | ENSG00000171791 | BCL2 | protein_coding | chr18 | 60792259 |
| MIMAT0004919 | hsa-miR-541-5p  | ENSG00000171791 | BCL2 | protein_coding | chr18 | 60987054 |
| MIMAT0004920 | hsa-miR-541-3p  | ENSG00000171791 | BCL2 | protein_coding | chr18 | 60794492 |
| MIMAT0004921 | hsa-miR-889-3p  | ENSG00000171791 | BCL2 | protein_coding | chr18 | 60793145 |
| MIMAT0004921 | hsa-miR-889-3p  | ENSG00000171791 | BCL2 | protein_coding | chr18 | 60793383 |
| MIMAT0004921 | hsa-miR-889-3p  | ENSG00000171791 | BCL2 | protein_coding | chr18 | 60795338 |
| MIMAT0004924 | hsa-miR-876-5p  | ENSG00000171791 | BCL2 | protein_coding | chr18 | 60791102 |
| MIMAT0004924 | hsa-miR-876-5p  | ENSG00000171791 | BCL2 | protein_coding | chr18 | 60794442 |
| MIMAT0004924 | hsa-miR-876-5p  | ENSG00000171791 | BCL2 | protein_coding | chr18 | 60795558 |
| MIMAT0004947 | hsa-miR-885-5p  | ENSG00000171791 | BCL2 | protein_coding | chr18 | 60790680 |
| MIMAT0004947 | hsa-miR-885-5p  | ENSG00000171791 | BCL2 | protein_coding | chr18 | 60791575 |
| MIMAT0004947 | hsa-miR-885-5p  | ENSG00000171791 | BCL2 | protein_coding | chr18 | 60793299 |
| MIMAT0004952 | hsa-miR-665     | ENSG00000171791 | BCL2 | protein_coding | chr18 | 60794284 |
| MIMAT0004953 | hsa-miR-873-5p  | ENSG00000171791 | BCL2 | protein_coding | chr18 | 60795320 |
| MIMAT0004954 | hsa-miR-543     | ENSG00000171791 | BCL2 | protein_coding | chr18 | 60791488 |
| MIMAT0004954 | hsa-miR-543     | ENSG00000171791 | BCL2 | protein_coding | chr18 | 60794086 |
| MIMAT0004955 | hsa-miR-374b-5p | ENSG00000171791 | BCL2 | protein_coding | chr18 | 60790954 |
| MIMAT0004955 | hsa-miR-374b-5p | ENSG00000171791 | BCL2 | protein_coding | chr18 | 60794131 |
| MIMAT0004958 | hsa-miR-301b-3p | ENSG00000171791 | BCL2 | protein_coding | chr18 | 60792741 |
| MIMAT0004958 | hsa-miR-301b-3p | ENSG00000171791 | BCL2 | protein_coding | chr18 | 60793021 |
| MIMAT0004959 | hsa-miR-216b-5p | ENSG00000171791 | BCL2 | protein_coding | chr18 | 60793952 |
| MIMAT0004959 | hsa-miR-216b-5p | ENSG00000171791 | BCL2 | protein_coding | chr18 | 60795197 |
| MIMAT0004960 | hsa-miR-208b-3p | ENSG00000171791 | BCL2 | protein_coding | chr18 | 60791401 |
| MIMAT0004985 | hsa-miR-942-5p  | ENSG00000171791 | BCL2 | protein_coding | chr18 | 60793917 |
| MIMAT0004985 | hsa-miR-942-5p  | ENSG00000171791 | BCL2 | protein_coding | chr18 | 60795383 |
| MIMAT0005788 | hsa-miR-513b-5p | ENSG00000171791 | BCL2 | protein_coding | chr18 | 60790608 |
| MIMAT0005788 | hsa-miR-513b-5p | ENSG00000171791 | BCL2 | protein_coding | chr18 | 60793798 |
| MIMAT0005788 | hsa-miR-513b-5p | ENSG00000171791 | BCL2 | protein_coding | chr18 | 60793981 |
| MIMAT0005789 | hsa-miR-513c-5p | ENSG00000171791 | BCL2 | protein_coding | chr18 | 60793954 |
| MIMAT0005792 | hsa-miR-320b    | ENSG00000171791 | BCL2 | protein_coding | chr18 | 60790847 |
| MIMAT0005792 | hsa-miR-320b    | ENSG00000171791 | BCL2 | protein_coding | chr18 | 60790978 |
| MIMAT0005792 | hsa-miR-320b    | ENSG00000171791 | BCL2 | protein_coding | chr18 | 60792280 |
| MIMAT0005792 | hsa-miR-320b    | ENSG00000171791 | BCL2 | protein_coding | chr18 | 60793850 |
| MIMAT0005793 | hsa-miR-320c    | ENSG00000171791 | BCL2 | protein_coding | chr18 | 60790847 |
| MIMAT0005793 | hsa-miR-320c    | ENSG00000171791 | BCL2 | protein_coding | chr18 | 60790978 |
| MIMAT0005793 | hsa-miR-320c    | ENSG00000171791 | BCL2 | protein_coding | chr18 | 60792280 |

|              |                 |                 |      |                |       |          |
|--------------|-----------------|-----------------|------|----------------|-------|----------|
| MIMAT0005793 | hsa-miR-320c    | ENSG00000171791 | BCL2 | protein_coding | chr18 | 60793850 |
| MIMAT0005795 | hsa-miR-1323    | ENSG00000171791 | BCL2 | protein_coding | chr18 | 60790916 |
| MIMAT0005795 | hsa-miR-1323    | ENSG00000171791 | BCL2 | protein_coding | chr18 | 60790963 |
| MIMAT0005795 | hsa-miR-1323    | ENSG00000171791 | BCL2 | protein_coding | chr18 | 60793202 |
| MIMAT0005796 | hsa-miR-1271-5p | ENSG00000171791 | BCL2 | protein_coding | chr18 | 60793313 |
| MIMAT0005796 | hsa-miR-1271-5p | ENSG00000171791 | BCL2 | protein_coding | chr18 | 60795542 |
| MIMAT0005796 | hsa-miR-1271-5p | ENSG00000171791 | BCL2 | protein_coding | chr18 | 60795648 |
| MIMAT0005797 | hsa-miR-1301-3p | ENSG00000171791 | BCL2 | protein_coding | chr18 | 60793023 |
| MIMAT0005797 | hsa-miR-1301-3p | ENSG00000171791 | BCL2 | protein_coding | chr18 | 60795762 |
| MIMAT0005798 | hsa-miR-1185-5p | ENSG00000171791 | BCL2 | protein_coding | chr18 | 60793262 |
| MIMAT0005800 | hsa-miR-1298-5p | ENSG00000171791 | BCL2 | protein_coding | chr18 | 60793407 |
| MIMAT0005800 | hsa-miR-1298-5p | ENSG00000171791 | BCL2 | protein_coding | chr18 | 60793423 |
| MIMAT0005824 | hsa-miR-1179    | ENSG00000171791 | BCL2 | protein_coding | chr18 | 60792405 |
| MIMAT0005824 | hsa-miR-1179    | ENSG00000171791 | BCL2 | protein_coding | chr18 | 60794079 |
| MIMAT0005877 | hsa-miR-1286    | ENSG00000171791 | BCL2 | protein_coding | chr18 | 60793316 |
| MIMAT0005885 | hsa-miR-1295a   | ENSG00000171791 | BCL2 | protein_coding | chr18 | 60793995 |
| MIMAT0005919 | hsa-miR-548o-3p | ENSG00000171791 | BCL2 | protein_coding | chr18 | 60790916 |
| MIMAT0005919 | hsa-miR-548o-3p | ENSG00000171791 | BCL2 | protein_coding | chr18 | 60790963 |
| MIMAT0005919 | hsa-miR-548o-3p | ENSG00000171791 | BCL2 | protein_coding | chr18 | 60793202 |
| MIMAT0005923 | hsa-miR-1269a   | ENSG00000171791 | BCL2 | protein_coding | chr18 | 60795306 |
| MIMAT0005924 | hsa-miR-1270    | ENSG00000171791 | BCL2 | protein_coding | chr18 | 60790704 |
| MIMAT0005924 | hsa-miR-1270    | ENSG00000171791 | BCL2 | protein_coding | chr18 | 60792478 |
| MIMAT0005930 | hsa-miR-1276    | ENSG00000171791 | BCL2 | protein_coding | chr18 | 60790806 |
| MIMAT0005930 | hsa-miR-1276    | ENSG00000171791 | BCL2 | protein_coding | chr18 | 60795276 |
| MIMAT0005931 | hsa-miR-302e    | ENSG00000171791 | BCL2 | protein_coding | chr18 | 60790675 |
| MIMAT0005931 | hsa-miR-302e    | ENSG00000171791 | BCL2 | protein_coding | chr18 | 60792740 |
| MIMAT0005931 | hsa-miR-302e    | ENSG00000171791 | BCL2 | protein_coding | chr18 | 60793020 |
| MIMAT0005951 | hsa-miR-1307-3p | ENSG00000171791 | BCL2 | protein_coding | chr18 | 60795118 |
| MIMAT0005952 | hsa-miR-1321    | ENSG00000171791 | BCL2 | protein_coding | chr18 | 60795297 |
| MIMAT0006764 | hsa-miR-320d    | ENSG00000171791 | BCL2 | protein_coding | chr18 | 60790847 |
| MIMAT0006764 | hsa-miR-320d    | ENSG00000171791 | BCL2 | protein_coding | chr18 | 60790978 |
| MIMAT0006764 | hsa-miR-320d    | ENSG00000171791 | BCL2 | protein_coding | chr18 | 60792280 |
| MIMAT0006764 | hsa-miR-320d    | ENSG00000171791 | BCL2 | protein_coding | chr18 | 60793850 |
| MIMAT0007885 | hsa-miR-1911-5p | ENSG00000171791 | BCL2 | protein_coding | chr18 | 60794097 |
| MIMAT0007888 | hsa-miR-1913    | ENSG00000171791 | BCL2 | protein_coding | chr18 | 60792569 |
| MIMAT0009198 | hsa-miR-224-3p  | ENSG00000171791 | BCL2 | protein_coding | chr18 | 60792435 |
| MIMAT0009198 | hsa-miR-224-3p  | ENSG00000171791 | BCL2 | protein_coding | chr18 | 60794122 |
| MIMAT0009198 | hsa-miR-224-3p  | ENSG00000171791 | BCL2 | protein_coding | chr18 | 60794535 |
| MIMAT0010357 | hsa-miR-670-5p  | ENSG00000171791 | BCL2 | protein_coding | chr18 | 60793432 |
| MIMAT0014980 | hsa-miR-3118    | ENSG00000171791 | BCL2 | protein_coding | chr18 | 60790649 |
| MIMAT0014980 | hsa-miR-3118    | ENSG00000171791 | BCL2 | protein_coding | chr18 | 60792531 |
| MIMAT0014983 | hsa-miR-3121-3p | ENSG00000171791 | BCL2 | protein_coding | chr18 | 60792231 |
| MIMAT0014983 | hsa-miR-3121-3p | ENSG00000171791 | BCL2 | protein_coding | chr18 | 60793984 |
| MIMAT0014983 | hsa-miR-3121-3p | ENSG00000171791 | BCL2 | protein_coding | chr18 | 60795655 |
| MIMAT0014990 | hsa-miR-3127-5p | ENSG00000171791 | BCL2 | protein_coding | chr18 | 60793901 |
| MIMAT0014990 | hsa-miR-3127-5p | ENSG00000171791 | BCL2 | protein_coding | chr18 | 60795068 |
| MIMAT0015008 | hsa-miR-3140-3p | ENSG00000171791 | BCL2 | protein_coding | chr18 | 60792945 |
| MIMAT0015008 | hsa-miR-3140-3p | ENSG00000171791 | BCL2 | protein_coding | chr18 | 60793927 |
| MIMAT0015008 | hsa-miR-3140-3p | ENSG00000171791 | BCL2 | protein_coding | chr18 | 60795111 |
| MIMAT0015016 | hsa-miR-3145-3p | ENSG00000171791 | BCL2 | protein_coding | chr18 | 60793337 |
| MIMAT0015016 | hsa-miR-3145-3p | ENSG00000171791 | BCL2 | protein_coding | chr18 | 60795088 |
| MIMAT0015016 | hsa-miR-3145-3p | ENSG00000171791 | BCL2 | protein_coding | chr18 | 60795636 |
| MIMAT0015037 | hsa-miR-3163    | ENSG00000171791 | BCL2 | protein_coding | chr18 | 60791457 |
| MIMAT0015037 | hsa-miR-3163    | ENSG00000171791 | BCL2 | protein_coding | chr18 | 60792415 |
| MIMAT0015037 | hsa-miR-3163    | ENSG00000171791 | BCL2 | protein_coding | chr18 | 60793376 |
| MIMAT0015037 | hsa-miR-3163    | ENSG00000171791 | BCL2 | protein_coding | chr18 | 60794345 |
| MIMAT0015038 | hsa-miR-3164    | ENSG00000171791 | BCL2 | protein_coding | chr18 | 60790650 |
| MIMAT0015038 | hsa-miR-3164    | ENSG00000171791 | BCL2 | protein_coding | chr18 | 60792532 |
| MIMAT0015042 | hsa-miR-3167    | ENSG00000171791 | BCL2 | protein_coding | chr18 | 60791101 |
| MIMAT0015042 | hsa-miR-3167    | ENSG00000171791 | BCL2 | protein_coding | chr18 | 60794441 |
| MIMAT0015042 | hsa-miR-3167    | ENSG00000171791 | BCL2 | protein_coding | chr18 | 60795557 |
| MIMAT0015069 | hsa-miR-3187-3p | ENSG00000171791 | BCL2 | protein_coding | chr18 | 60790696 |
| MIMAT0015069 | hsa-miR-3187-3p | ENSG00000171791 | BCL2 | protein_coding | chr18 | 60793862 |
| MIMAT0015069 | hsa-miR-3187-3p | ENSG00000171791 | BCL2 | protein_coding | chr18 | 60794546 |
| MIMAT0015078 | hsa-miR-3194-5p | ENSG00000171791 | BCL2 | protein_coding | chr18 | 60795411 |

|              |                 |                 |      |                |       |          |
|--------------|-----------------|-----------------|------|----------------|-------|----------|
| MIMAT0015085 | hsa-miR-3200-3p | ENSG00000171791 | BCL2 | protein_coding | chr18 | 60790930 |
| MIMAT0015085 | hsa-miR-3200-3p | ENSG00000171791 | BCL2 | protein_coding | chr18 | 60791026 |
| MIMAT0015085 | hsa-miR-3200-3p | ENSG00000171791 | BCL2 | protein_coding | chr18 | 60791227 |
| MIMAT0016870 | hsa-miR-4319    | ENSG00000171791 | BCL2 | protein_coding | chr18 | 60792304 |
| MIMAT0016870 | hsa-miR-4319    | ENSG00000171791 | BCL2 | protein_coding | chr18 | 60793433 |
| MIMAT0016894 | hsa-miR-4262    | ENSG00000171791 | BCL2 | protein_coding | chr18 | 60792955 |
| MIMAT0016894 | hsa-miR-4262    | ENSG00000171791 | BCL2 | protein_coding | chr18 | 60794100 |
| MIMAT0016895 | hsa-miR-2355-5p | ENSG00000171791 | BCL2 | protein_coding | chr18 | 60790984 |
| MIMAT0016895 | hsa-miR-2355-5p | ENSG00000171791 | BCL2 | protein_coding | chr18 | 60794255 |
| MIMAT0016895 | hsa-miR-2355-5p | ENSG00000171791 | BCL2 | protein_coding | chr18 | 60795387 |
| MIMAT0016895 | hsa-miR-2355-5p | ENSG00000171791 | BCL2 | protein_coding | chr18 | 60795418 |
| MIMAT0017950 | hsa-miR-2355-3p | ENSG00000171791 | BCL2 | protein_coding | chr18 | 60791350 |
| MIMAT0017950 | hsa-miR-2355-3p | ENSG00000171791 | BCL2 | protein_coding | chr18 | 60791366 |
| MIMAT0017989 | hsa-miR-3612    | ENSG00000171791 | BCL2 | protein_coding | chr18 | 60795299 |
| MIMAT0018000 | hsa-miR-23c     | ENSG00000171791 | BCL2 | protein_coding | chr18 | 60791441 |
| MIMAT0018000 | hsa-miR-23c     | ENSG00000171791 | BCL2 | protein_coding | chr18 | 60792191 |
| MIMAT0018000 | hsa-miR-23c     | ENSG00000171791 | BCL2 | protein_coding | chr18 | 60792428 |
| MIMAT0018003 | hsa-miR-3622a-5 | ENSG00000171791 | BCL2 | protein_coding | chr18 | 60794904 |
| MIMAT0018003 | hsa-miR-3622a-5 | ENSG00000171791 | BCL2 | protein_coding | chr18 | 60795503 |
| MIMAT0018119 | hsa-miR-3690    | ENSG00000171791 | BCL2 | protein_coding | chr18 | 60792270 |
| MIMAT0018119 | hsa-miR-3690    | ENSG00000171791 | BCL2 | protein_coding | chr18 | 60794316 |
| MIMAT0018192 | hsa-miR-3918    | ENSG00000171791 | BCL2 | protein_coding | chr18 | 60793902 |
| MIMAT0018192 | hsa-miR-3918    | ENSG00000171791 | BCL2 | protein_coding | chr18 | 60794605 |
| MIMAT0018192 | hsa-miR-3918    | ENSG00000171791 | BCL2 | protein_coding | chr18 | 60795069 |
| MIMAT0018192 | hsa-miR-3918    | ENSG00000171791 | BCL2 | protein_coding | chr18 | 60795353 |
| MIMAT0018443 | hsa-miR-374c-5p | ENSG00000171791 | BCL2 | protein_coding | chr18 | 60794112 |
| MIMAT0018937 | hsa-miR-378g    | ENSG00000171791 | BCL2 | protein_coding | chr18 | 60792376 |
| MIMAT0018937 | hsa-miR-378g    | ENSG00000171791 | BCL2 | protein_coding | chr18 | 60793060 |
| MIMAT0018943 | hsa-miR-4428    | ENSG00000171791 | BCL2 | protein_coding | chr18 | 60987008 |
| MIMAT0019064 | hsa-miR-4525    | ENSG00000171791 | BCL2 | protein_coding | chr18 | 60987010 |
| MIMAT0019214 | hsa-miR-3173-5p | ENSG00000171791 | BCL2 | protein_coding | chr18 | 60792303 |
| MIMAT0019694 | hsa-miR-4637    | ENSG00000171791 | BCL2 | protein_coding | chr18 | 60792113 |
| MIMAT0019699 | hsa-miR-4640-5p | ENSG00000171791 | BCL2 | protein_coding | chr18 | 60792378 |
| MIMAT0019699 | hsa-miR-4640-5p | ENSG00000171791 | BCL2 | protein_coding | chr18 | 60793049 |
| MIMAT0019699 | hsa-miR-4640-5p | ENSG00000171791 | BCL2 | protein_coding | chr18 | 60794495 |
| MIMAT0019761 | hsa-miR-4677-3p | ENSG00000171791 | BCL2 | protein_coding | chr18 | 60792530 |
| MIMAT0019761 | hsa-miR-4677-3p | ENSG00000171791 | BCL2 | protein_coding | chr18 | 60793171 |
| MIMAT0019798 | hsa-miR-4701-5p | ENSG00000171791 | BCL2 | protein_coding | chr18 | 60790696 |
| MIMAT0019798 | hsa-miR-4701-5p | ENSG00000171791 | BCL2 | protein_coding | chr18 | 60793862 |
| MIMAT0019798 | hsa-miR-4701-5p | ENSG00000171791 | BCL2 | protein_coding | chr18 | 60794546 |
| MIMAT0019845 | hsa-miR-4726-5p | ENSG00000171791 | BCL2 | protein_coding | chr18 | 60792378 |
| MIMAT0019845 | hsa-miR-4726-5p | ENSG00000171791 | BCL2 | protein_coding | chr18 | 60793049 |
| MIMAT0019845 | hsa-miR-4726-5p | ENSG00000171791 | BCL2 | protein_coding | chr18 | 60794495 |
| MIMAT0019853 | hsa-miR-4731-5p | ENSG00000171791 | BCL2 | protein_coding | chr18 | 60793059 |
| MIMAT0019868 | hsa-miR-4739    | ENSG00000171791 | BCL2 | protein_coding | chr18 | 60795297 |
| MIMAT0019899 | hsa-miR-4756-5p | ENSG00000171791 | BCL2 | protein_coding | chr18 | 60795297 |
| MIMAT0019909 | hsa-miR-4761-3p | ENSG00000171791 | BCL2 | protein_coding | chr18 | 60795162 |
| MIMAT0019909 | hsa-miR-4761-3p | ENSG00000171791 | BCL2 | protein_coding | chr18 | 60795354 |
| MIMAT0019924 | hsa-miR-4770    | ENSG00000171791 | BCL2 | protein_coding | chr18 | 60791332 |
| MIMAT0019924 | hsa-miR-4770    | ENSG00000171791 | BCL2 | protein_coding | chr18 | 60794034 |
| MIMAT0020541 | hsa-miR-5047    | ENSG00000171791 | BCL2 | protein_coding | chr18 | 60793023 |
| MIMAT0020541 | hsa-miR-5047    | ENSG00000171791 | BCL2 | protein_coding | chr18 | 60795762 |
| MIMAT0021043 | hsa-miR-5010-5p | ENSG00000171791 | BCL2 | protein_coding | chr18 | 60987010 |
| MIMAT0022270 | hsa-miR-5579-3p | ENSG00000171791 | BCL2 | protein_coding | chr18 | 60795132 |
| MIMAT0022287 | hsa-miR-5586-5p | ENSG00000171791 | BCL2 | protein_coding | chr18 | 60791325 |
| MIMAT0022287 | hsa-miR-5586-5p | ENSG00000171791 | BCL2 | protein_coding | chr18 | 60791586 |
| MIMAT0022287 | hsa-miR-5586-5p | ENSG00000171791 | BCL2 | protein_coding | chr18 | 60793873 |
| MIMAT0022287 | hsa-miR-5586-5p | ENSG00000171791 | BCL2 | protein_coding | chr18 | 60795514 |
| MIMAT0022479 | hsa-miR-5688    | ENSG00000171791 | BCL2 | protein_coding | chr18 | 60790670 |
| MIMAT0022479 | hsa-miR-5688    | ENSG00000171791 | BCL2 | protein_coding | chr18 | 60790843 |
| MIMAT0022479 | hsa-miR-5688    | ENSG00000171791 | BCL2 | protein_coding | chr18 | 60790894 |
| MIMAT0022479 | hsa-miR-5688    | ENSG00000171791 | BCL2 | protein_coding | chr18 | 60790919 |
| MIMAT0022479 | hsa-miR-5688    | ENSG00000171791 | BCL2 | protein_coding | chr18 | 60790961 |
| MIMAT0022479 | hsa-miR-5688    | ENSG00000171791 | BCL2 | protein_coding | chr18 | 60792420 |
| MIMAT0022479 | hsa-miR-5688    | ENSG00000171791 | BCL2 | protein_coding | chr18 | 60793193 |

|              |                 |                 |      |                |       |          |
|--------------|-----------------|-----------------|------|----------------|-------|----------|
| MIMAT0022479 | hsa-miR-5688    | ENSG00000171791 | BCL2 | protein_coding | chr18 | 60793847 |
| MIMAT0022479 | hsa-miR-5688    | ENSG00000171791 | BCL2 | protein_coding | chr18 | 60794020 |
| MIMAT0022697 | hsa-miR-382-3p  | ENSG00000171791 | BCL2 | protein_coding | chr18 | 60793406 |
| MIMAT0022698 | hsa-miR-345-3p  | ENSG00000171791 | BCL2 | protein_coding | chr18 | 60792304 |
| MIMAT0022698 | hsa-miR-345-3p  | ENSG00000171791 | BCL2 | protein_coding | chr18 | 60793433 |
| MIMAT0022717 | hsa-miR-873-3p  | ENSG00000171791 | BCL2 | protein_coding | chr18 | 60790706 |
| MIMAT0022717 | hsa-miR-873-3p  | ENSG00000171791 | BCL2 | protein_coding | chr18 | 60793896 |
| MIMAT0022724 | hsa-miR-1277-5p | ENSG00000171791 | BCL2 | protein_coding | chr18 | 60793145 |
| MIMAT0022724 | hsa-miR-1277-5p | ENSG00000171791 | BCL2 | protein_coding | chr18 | 60795048 |
| MIMAT0022736 | hsa-miR-642b-5p | ENSG00000171791 | BCL2 | protein_coding | chr18 | 60791190 |
| MIMAT0022736 | hsa-miR-642b-5p | ENSG00000171791 | BCL2 | protein_coding | chr18 | 60793430 |
| MIMAT0022736 | hsa-miR-642b-5p | ENSG00000171791 | BCL2 | protein_coding | chr18 | 60794253 |
| MIMAT0022736 | hsa-miR-642b-5p | ENSG00000171791 | BCL2 | protein_coding | chr18 | 60794566 |
| MIMAT0022736 | hsa-miR-642b-5p | ENSG00000171791 | BCL2 | protein_coding | chr18 | 60795226 |
| MIMAT0022834 | hsa-miR-365b-3p | ENSG00000171791 | BCL2 | protein_coding | chr18 | 60794141 |
| MIMAT0022834 | hsa-miR-365b-3p | ENSG00000171791 | BCL2 | protein_coding | chr18 | 60794278 |
| MIMAT0023713 | hsa-miR-6088    | ENSG00000171791 | BCL2 | protein_coding | chr18 | 60791332 |
| MIMAT0023713 | hsa-miR-6088    | ENSG00000171791 | BCL2 | protein_coding | chr18 | 60794034 |
| MIMAT0027571 | hsa-miR-6835-3p | ENSG00000171791 | BCL2 | protein_coding | chr18 | 60793250 |
| MIMAT0027578 | hsa-miR-6838-5p | ENSG00000171791 | BCL2 | protein_coding | chr18 | 60793322 |
